# Supplementary material for: Earnings Management and Investment Efficiency: The Moderating Roles of Institutional and State Ownership in Vietnam
Source: Research Square preprint supplement (doi:10.21203/rs.3.rs-8472373/v1), 2026-01-22
Supplement: Supplementary file 1 [file 903963edd8975674891e4dce.xlsx]

## Sheet: Data_raw 2020_2025
Year	MACK	INDUS	MANGOW	INSTOW	STATOW	REM	aREM	ROA	ROE	Tobin's Q	Invest	Salesgrowth	CFOt	CFOt-1	LEVt-1	FSIZEt-1	aAEM	AEM	TA	REV	PPE	ROA	CFO	FSIZE	LEV	TANG	LIQ	BIG4	GROWTH
2020	AAV	Bất động sản	0.4342	0.39	0	0.0455762	0.0455762	0.0224	0.0369	1.48519	0.00738567	-0.380163	-0.041529	-0.041529	0.354979	27.1214	0.001	-0.001	0.063929	-0.380163	0.0632132	0.0224	-0.041529	27.1214	0.354979	0.0619521	2.17918	0	-0.408816
2021	AAV	Bất động sản	0.3299	0.4242	0	0.5661	0.5661	0.0315	0.0445	0.482355	0.0164288	-0.380163	-0.614845	-0.041529	0.354979	27.1214	0.069	-0.069	0.646345	0.294959	0.0384014	0.0315	-0.15526	27.623	0.186696	0.023255	4.9602	0	0.547455
2022	AAV	Bất động sản	0.2381	0.4198	0	0.014756	0.014756	0.0015	0.002	0.499795	0.0115617	0.294959	-0.0301933	-0.614845	0.186696	27.623	0.002	0.002	0.0316933	-0.00442395	0.0217218	0.0015	-0.00940265	27.7076	0.250582	0.0199588	3.41682	0	-0.00876213
2023	AAV	Bất động sản	0.2357	0.2917	0	0.00283892	0.00283892	-0.017	-0.0225	0.74415	0	-0.00442395	0.0280835	-0.0301933	0.250582	27.7076	0.197	-0.197	-0.0450835	-0.392128	0.0180735	-0.017	0.00731785	27.5456	0.150531	0.0212528	7.6543	0	-0.852731
2024	AAV	Bất động sản	0.2917	0.2917	0	-0.234393	0.234393	-0.0169	-0.0203	0.71882	0.019644	-0.392128	0.230193	0.0280835	0.150531	27.5456	0.004	-0.004	-0.247093	-0.0377152	0.0286034	-0.0169	0.0528958	27.5627	0.179592	0.0281181	4.96961	0	-0.473605
2020	ADC	Dịch vụ viễn thông	0.1819	0.5477	0.374	-1.67383	1.67383	0.0929	0.204	1.18996	0.0179023	0.0146268	0.0625752	0.0625752	0.537172	25.6458	0.046	0.046	0.0234248	0.0146268	0.169083	0.0929	0.0625752	25.6458	0.537172	0.158775	1.36329	0	0.00497853
2021	ADC	Dịch vụ viễn thông	0.1819	0.6276	0.374	-0.987315	0.987315	0.0739	0.1593	1.01062	0.00114425	0.0146268	-0.157153	0.0625752	0.537172	25.6458	0.284	-0.284	0.244953	-0.593367	0.154457	0.0739	-0.0405234	25.6918	0.534868	0.147507	1.46553	0	-0.214011
2022	ADC	Dịch vụ viễn thông	0.1819	0.633	0.3794	-1.49049	1.49049	0.086	0.1888	0.999998	0.00145157	-0.593367	0.0333826	-0.157153	0.534868	25.6918	0.024	0.024	0.0494174	0.633493	0.135222	0.086	0.00853774	25.8106	0.552971	0.120077	1.42797	0	0.304391
2023	ADC	Dịch vụ viễn thông	0.1819	0.633	0.3794	-1.60072	1.60072	0.0878	0.1892	1.03392	0.00398867	0.633493	0.175929	0.0333826	0.552971	25.8106	0.078	0.078	-0.160729	0.254681	0.112087	0.0878	0.0465913	25.8124	0.51905	0.111885	1.58176	0	0.105649
2024	ADC	Dịch vụ viễn thông	0.1819	0.6021	0.3794	-1.55903	1.55903	0.0828	0.1732	1.00203	0.00726669	0.254681	0.181581	0.175929	0.51905	25.8124	0.214	-0.214	-0.163081	-0.119375	0.106219	0.0828	0.0454362	25.8873	0.524323	0.0985516	1.61791	0	-0.0448691
2020	ALT	Nguyên vật liệu	0.2197	0.6413	0.1325	-0.292327	0.292327	0.0152	0.0191	0.693439	0.159783	-0.0372527	0.172235	0.172235	0.26927	26.4017	0.002	-0.002	-0.163035	-0.0372527	0.152651	0.0152	0.172235	26.4017	0.26927	0.127913	2.1498	0	-0.0453006
2021	ALT	Nguyên vật liệu	0.2197	0.6407	0.1325	-0.254836	0.254836	0.0185	0.0245	0.564165	0.0887274	-0.0372527	0.0968772	0.172235	0.26927	26.4017	0.022	-0.022	-0.0158772	0.104421	0.208908	0.0185	0.0263548	26.3457	0.222704	0.220934	2.64965	0	0.158729
2022	ALT	Nguyên vật liệu	0.2213	0.5961	0.1325	-0.0542749	0.0542749	0.032	0.0434	0.566718	0.0324555	0.104421	-0.0301545	0.0968772	0.222704	26.3457	0.285	0.285	0.108254	0.139389	0.192619	0.032	-0.00732771	26.4672	0.29792	0.170583	2.21543	0	0.172905
2023	ALT	Nguyên vật liệu	0.2607	0.6849	0.1325	-0.260872	0.260872	0.022	0.0319	0.549823	0.0811578	0.139389	0.0820169	-0.0301545	0.29792	26.4672	0.032	-0.032	-0.00321695	0.135172	0.19573	0.022	0.0217483	26.5124	0.325018	0.187081	1.76477	0	0.161423
2024	ALT	Nguyên vật liệu	0.313	0.6069	0.1325	-0.19714	0.19714	0.0092	0.0145	0.590661	0.0663112	0.135172	0.0592739	0.0820169	0.325018	26.5124	0.079	0.079	0.0247261	0.339979	0.199697	0.0092	0.0151533	26.6043	0.400067	0.18217	1.62434	0	0.365736
2020	AMC	Nguyên vật liệu	0.4502	0.4	0.4	-1.37655	1.37655	0.081	0.1534	1.22152	0.056916	0.155284	0.194505	0.194505	0.477264	25.2848	0.05	0.050	-0.130305	0.155284	0.400759	0.081	0.194505	25.2848	0.477264	0.387217	1.12901	0	0.103204
2021	AMC	Nguyên vật liệu	0.4502	0.4	0.4	-1.24177	1.24177	0.0781	0.141	1.16099	0.00614101	0.155284	0.0495662	0.194505	0.477264	25.2848	0.583	0.583	-0.0186662	0.0445452	0.318429	0.0781	0.0126045	25.1718	0.411024	0.356521	1.33137	0	0.0277742
2022	AMC	Nguyên vật liệu	0.3485	0.4	0.4	-1.62426	1.62426	0.0788	0.126	1.00252	0.00575948	0.0445452	0.243146	0.0495662	0.411024	25.1718	0.049	-0.049	-0.236246	0.0861694	0.288381	0.0788	0.0573559	25.0391	0.332605	0.329318	1.67806	0	0.04669
2023	AMC	Nguyên vật liệu	0.1674	0.4	0.4	-1.20571	1.20571	0.084	0.1272	0.924989	0.0465461	0.0861694	0.0699715	0.243146	0.332605	25.0391	0.107	-0.107	-0.0756715	-0.244524	0.295477	0.084	0.0163336	25.0846	0.346711	0.282331	1.70717	0	-0.110847
2024	AMC	Nguyên vật liệu	0.1674	0.8348	0.4	-1.17713	1.17713	0.0686	0.1189	0.928668	0.0247493	-0.244524	0.00460616	0.0699715	0.346711	25.0846	0.302	-0.302	0.0144938	0.164969	0.247382	0.0686	0.00117774	25.349	0.481941	0.189911	1.50832	0	0.0880231
2020	AMV	Chăm sóc sức khỏe	0.1429	0.143	0	-0.125807	0.125807	0.0944	0.1127	0.538935	0.0333576	-0.373174	0.108367	0.108367	0.110014	27.5481	0.454	0.454	-0.131567	-0.373174	0.068227	0.0944	0.108367	27.5481	0.110014	0.0646333	5.41484	0	-0.667648
2021	AMV	Chăm sóc sức khỏe	0.0559	0.0559	0	0.764533	0.764533	0.0642	0.0821	0.414818	0.109889	-0.373174	-0.576838	0.108367	0.110014	27.5481	0.496	0.496	0.566838	0.0634795	0.169757	0.0642	-0.14811	28.0563	0.206405	0.102125	6.39955	0	0.360721
2022	AMV	Chăm sóc sức khỏe	0	0.0533	0	0.139429	0.139429	0.0309	0.0397	0.417823	-0.00965775	0.0634795	-0.230961	-0.576838	0.206405	28.0563	0.024	-0.024	0.240761	0.0421111	0.113046	0.0309	-0.0721035	28.3251	0.162411	0.0863993	7.85635	0	0.292322
2023	AMV	Chăm sóc sức khỏe	0	0.0533	0	0.0910194	0.0910194	0.0069	0.0086	0.243038	-0.073823	0.0421111	-0.0688633	-0.230961	0.162411	28.3251	0.204	0.204	0.0811633	-0.044095	0.0872499	0.0069	-0.0195159	28.3105	0.143359	0.0885322	10.2075	0	-0.309904
2024	AMV	Chăm sóc sức khỏe	0	0	0	-0.495535	0.495535	-0.0057	-0.0067	0.245234	0.0090393	-0.044095	0.342085	-0.0688633	0.143359	28.3105	0.311	-0.311	-0.322285	0.0576732	0.146734	-0.0057	0.0848973	28.3017	0.144674	0.148031	6.09824	0	0.578849
2020	API	Bất động sản	0	0.5043	0	0.181963	0.181963	0.0191	0.1002	1.57282	0.000283715	0.0156703	-0.0268655	-0.0268655	0.817243	28.709	0.014	-0.014	0.0434655	0.0156703	0.0271352	0.0191	-0.0268655	28.709	0.817243	0.0226484	1.20358	0	0.08511
2021	API	Bất động sản	0.2058	0.6672	0	-0.155739	0.155739	0.0696	0.2931	0.821503	3.20202e-05	0.0156703	-0.0730407	-0.0268655	0.817243	28.709	0.017	-0.017	0.0992407	0.230707	0.0418377	0.0696	-0.0199059	28.6784	0.703495	0.0431378	1.1528	0	1.38352
2022	API	Bất động sản	0.2196	0.5512	0	-0.186694	0.186694	0.045	0.1343	0.790439	-0.0533939	0.230707	-0.0389124	-0.0730407	0.703495	28.6784	0.172	-0.172	0.0601124	-0.135225	0.0641299	0.045	-0.00957927	28.561	0.611279	0.0721201	1.64844	0	-0.32997
2023	API	Bất động sản	0.2104	0.4921	0	-0.0702776	0.0702776	-0.0232	-0.0597	0.901557	2.17018e-05	-0.135225	-0.0242106	-0.0389124	0.611279	28.561	0.031	-0.031	0.0418106	-0.232571	0.0754803	-0.0232	-0.00569772	28.4578	0.592583	0.0836819	1.38577	0	-0.75315
2024	API	Bất động sản	0.0092	0.4921	0	-0.0678722	0.0678722	-0.01	-0.0242	0.883167	-0.011372	-0.232571	0.00335738	-0.0242106	0.592583	28.4578	0.005	-0.005	0.0176426	0.00717191	0.00740886	-0.01	0.000796094	28.4056	0.580871	0.0078063	1.53101	0	0.0848652
2020	ARM	Công nghiệp	0.2757	0.7771	0.4131	0.239987	0.239987	0.0098	0.0444	1.61533	-0.0020648	-0.691324	-0.299395	-0.299395	0.811977	25.9893	0.611	0.611	0.316795	-0.691324	0.0304231	0.0098	-0.299395	25.9893	0.811977	0.0252478	1.16927	0	-0.382591
2021	ARM	Công nghiệp	0.2757	0.8288	0.4131	-0.316969	0.316969	0.0123	0.0531	1.99388	0.00721397	-0.691324	0.204917	-0.299395	0.811977	25.9893	0.452	0.452	-0.263617	0.0628607	0.0313141	0.0123	0.0559917	25.51	0.696557	0.0505684	1.32584	0	0.0678951
2022	ARM	Công nghiệp	0.2757	0.84	0.41	-0.394943	0.394943	0.0198	0.0658	1.2768	0.0402249	0.0628607	0.153775	0.204917	0.696557	25.51	0.334	0.334	-0.155575	-0.0922955	0.075058	0.0198	0.0294039	25.5062	0.701186	0.0753464	1.3107	0	-0.0578059
2023	ARM	Công nghiệp	0.2757	0.84	0.41	0.147395	0.147395	0.0263	0.1069	1.26227	0.0147971	-0.0922955	-0.404486	0.153775	0.701186	25.5062	0.148	0.148	0.666186	0.199904	0.0664003	0.0263	-0.100928	25.9031	0.789394	0.0446491	1.20647	0	0.132375
2024	ARM	Công nghiệp	0.2757	0.8428	0.4131	-0.447622	0.447622	0.0273	0.1256	1.22936	0.0132846	0.199904	0.300661	-0.404486	0.789394	25.9031	0.212	-0.212	-0.166261	0.706977	0.0367067	0.0273	0.0898879	25.8724	0.77606	0.0378508	1.41831	0	0.614834
2020	BBS	Nguyên vật liệu	0.25	0.5927	0.3429	-0.142909	0.142909	0.0166	0.0636	0.924384	0.0189569	0.0855588	0.0554486	0.0554486	0.723708	26.6783	0.16	0.160	0.127651	0.0855588	0.327367	0.0166	0.0554486	26.6783	0.723708	0.363849	0.927233	0	0.0808625
2021	BBS	Nguyên vật liệu	0.3231	0.6659	0.3429	-0.083957	0.083957	0.0262	0.094	0.879522	0.00329653	0.0855588	0.0821207	0.0554486	0.723708	26.6783	0.281	-0.281	-0.00362071	0.0858181	0.293894	0.0262	0.0194466	26.701	0.719853	0.287289	0.999695	0	0.0675157
2022	BBS	Nguyên vật liệu	0.2326	0.7417	0.3429	-0.0659086	0.0659086	0.0212	0.0712	0.865971	0.0628101	0.0858181	0.0704895	0.0821207	0.719853	26.701	0.015	-0.015	0.0038105	-0.189913	0.283213	0.0212	0.0178227	26.5625	0.682571	0.325304	1.00062	0	-0.143179
2023	BBS	Nguyên vật liệu	0.2425	0.8271	0.3429	-0.152713	0.152713	0.0176	0.0523	0.844338	0.00168457	-0.189913	0.129429	0.0704895	0.682571	26.5625	0.244	0.244	-0.0686288	-0.270148	0.241561	0.0176	0.030119	26.4249	0.641904	0.277192	1.12602	0	-0.206946
2024	BBS	Nguyên vật liệu	0.243	0.5755	0.3429	-0.159906	0.159906	0.021	0.0576	0.839928	0.0313379	-0.270148	0.0935214	0.129429	0.641904	26.4249	0.049	0.049	-0.0475214	-0.000382331	0.231277	0.021	0.0217745	26.3976	0.62984	0.237669	1.21036	0	-0.00032184
2020	BCC	Nguyên vật liệu	0.0006	0.7315	0.7315	-0.198552	0.198552	0.035	0.0732	1.02174	0.00954661	0.10417	0.0964485	0.0964485	0.487454	29.0488	0.079	0.079	0.0102515	0.10417	0.756579	0.035	0.0964485	29.0488	0.487454	0.831926	0.272013	1	0.12358
2021	BCC	Nguyên vật liệu	0.7318	0.7315	0.7315	-0.199482	0.199482	0.0211	0.0395	0.796722	0.021714	0.10417	0.10239	0.0964485	0.487454	29.0488	0.24	0.240	-0.0174899	0.00756279	0.766837	0.0211	0.0243833	28.9859	0.453448	0.81658	0.316692	0	0.00726198
2022	BCC	Nguyên vật liệu	0.0003	0.7315	0.7315	-0.0573168	0.0573168	0.0174	0.0323	0.767722	0.0498732	0.00756279	0.0459574	0.10239	0.453448	28.9859	0.048	0.048	0.111543	-0.0288242	0.811723	0.0174	0.0111284	29.0418	0.482179	0.767606	0.423879	1	-0.0258043
2023	BCC	Nguyên vật liệu	0.6099	0.7315	0.7315	-0.0638523	0.0638523	-0.0587	-0.1146	0.761215	0.0275088	-0.0288242	0.00699489	0.0459574	0.482179	29.0418	0.13	-0.130	0.131805	-0.277361	0.708167	-0.0587	0.00179757	28.9276	0.511878	0.793857	0.336299	1	-0.269527
2024	BCC	Nguyên vật liệu	0	0.7315	0.7315	-0.106951	0.106951	-0.0018	-0.0035	0.742889	0.0374326	-0.277361	0.0554166	0.00699489	0.511878	28.9276	0.125	-0.125	0.0720834	0.111196	0.710362	-0.0018	0.0130638	28.8584	0.47931	0.761227	0.417104	1	0.131959
2020	BCF	Tiêu dùng thiết yếu	0.4606	0.5397	0	-0.711239	0.711239	0.2617	0.3729	2.20316	0.0280495	0.193311	0.220432	0.220432	0.302345	26.699	0.117	0.117	-0.174032	0.193311	0.180235	0.2617	0.220432	26.699	0.302345	0.144973	2.66495	0	0.115432
2021	BCF	Tiêu dùng thiết yếu	0.4239	0.4801	0	-0.463702	0.463702	0.1344	0.1863	2.58907	0.0629462	0.193311	0.164055	0.220432	0.302345	26.699	0.045	0.045	-0.124455	-0.203048	0.113591	0.1344	0.0454608	26.731	0.255446	0.110015	3.11977	0	-0.135137
2022	BCF	Tiêu dùng thiết yếu	0.5906	0.4977	0	-0.712837	0.712837	0.2519	0.3371	2.2508	0.067794	-0.203048	0.200205	0.164055	0.255446	26.731	0.003	0.003	-0.175405	0.45793	0.185934	0.2519	0.0508518	26.8371	0.250083	0.167212	3.1812	0	0.363849
2023	BCF	Tiêu dùng thiết yếu	0.5957	0.548	0	-0.470733	0.470733	0.136	0.1833	3.04848	0.136619	0.45793	0.176929	0.200205	0.250083	26.8371	0.074	0.074	-0.157629	-0.228949	0.146501	0.136	0.0465772	26.9	0.265516	0.137575	2.71682	0	-0.148314
2024	BCF	Tiêu dùng thiết yếu	0.6076	0.5182	0.5182	-0.700903	0.700903	0.1831	0.2757	2.51158	0.0539219	-0.228949	0.269324	0.176929	0.265516	26.9	0.13	0.130	-0.263724	0.347987	0.146866	0.1831	0.0694466	27.1951	0.388563	0.109338	2.44657	0	0.281857
2020	BDB	Dịch vụ viễn thông	0.0146	0.4017	0.4017	-0.183473	0.183473	0.0785	0.1028	1.11723	0	0.689547	0.189877	0.189877	0.238141	23.6031	0.055	0.055	-0.106277	0.689547	0.245666	0.0785	0.189877	23.6031	0.238141	0.233852	3.21918	0	0.232242
2021	BDB	Dịch vụ viễn thông	0.0146	0.4017	0.4017	0.688527	0.688527	0.0743	0.1138	0.967324	0	0.689547	-0.193225	0.189877	0.238141	23.6031	0.071	-0.071	0.270225	0.195938	0.215643	0.0743	-0.0494964	23.923	0.425338	0.156612	1.95364	0	0.0562604
2022	BDB	Dịch vụ viễn thông	0.0146	0.4017	0.4017	0.298036	0.298036	0.0608	0.0989	0.829046	0.0295364	0.195938	-0.162846	-0.193225	0.425338	23.923	0.146	-0.146	0.252046	0.37964	0.174193	0.0608	-0.0471675	23.7843	0.33836	0.200099	2.34496	0	0.142101
2023	BDB	Dịch vụ viễn thông	0.0129	0.5018	0.4017	0.136596	0.136596	0.046	0.0677	0.753585	0	0.37964	0.0370156	-0.162846	0.33836	23.7843	0.043	0.043	0.0476844	-0.485819	0.189604	0.046	0.0086134	23.702	0.300978	0.205883	2.58674	0	-0.138606
2024	BDB	Dịch vụ viễn thông	0.0006	0.761	0.4017	0.470121	0.470121	0.0301	0.0501	0.82165	0.0124199	-0.485819	0.0439424	0.0370156	0.300978	23.702	0.04	0.040	0.0172576	0.233868	0.19547	0.0301	0.0105334	23.9644	0.473531	0.150344	1.78036	0	0.0713348
2020	BED	Dịch vụ viễn thông	0.7857	0.8926	0	-0.465166	0.465166	0.1461	0.181	2.8261	0	-0.236123	0.164092	0.164092	0.196034	24.6835	0.13	0.130	-0.147192	-0.236123	0.372942	0.1461	0.164092	24.6835	0.196034	0.359667	2.79062	0	-0.13466
2021	BED	Dịch vụ viễn thông	0.7857	0.8926	0	-0.253084	0.253084	0.1067	0.1335	2.55589	-0.00968171	-0.236123	0.0442416	0.164092	0.196034	24.6835	0.028	-0.028	-0.0724416	-0.0582819	0.309337	0.1067	0.0112608	24.6536	0.205221	0.318743	2.74539	0	-0.039828
2022	BED	Dịch vụ viễn thông	0.7857	0.8926	0	-0.437684	0.437684	0.0849	0.1069	2.0345	0	-0.0582819	0.0594627	0.0442416	0.205221	24.6536	0.107	-0.107	-0.120663	0.21426	0.308743	0.0849	0.0146431	24.6203	0.207255	0.319193	2.84609	0	0.147992
2023	BED	Dịch vụ viễn thông	0.7857	0.8926	0	-0.668565	0.668565	0.1575	0.1975	1.91899	0.00125105	0.21426	0.228008	0.0594627	0.207255	24.6203	0.107	0.107	-0.100108	-0.0442592	0.34272	0.1575	0.0560534	24.7067	0.198415	0.314332	3.25904	0	-0.0257577
2024	BED	Dịch vụ viễn thông	0.7857	0.8927	0	-0.427886	0.427886	0.1388	0.1731	1.90058	-0.082513	-0.0442592	0.104799	0.228008	0.198415	24.7067	0.264	0.264	-0.0168988	-0.054694	0.308883	0.1388	0.0273317	24.717	0.197656	0.305713	3.47681	0	-0.0356226
2020	BNA	Tiêu dùng thiết yếu	0.3754	0.6075	0	-0.402312	0.402312	0.1275	0.2409	1.53786	0.16442	1.8678	0.129034	0.129034	0.495564	26.4749	0.173	-0.173	-0.00353436	1.8678	0.709904	0.1275	0.129034	26.4749	0.495564	0.416571	0.883192	0	1.36892
2021	BNA	Tiêu dùng thiết yếu	0.3745	0.5487	0	0.428113	0.428113	0.1416	0.246	0.746755	0.363134	1.8678	-0.485086	0.129034	0.495564	26.4749	0.065	-0.065	0.513386	1.28544	0.450318	0.1416	-0.15285	27.0818	0.355356	0.245421	2.10999	0	0.677737
2022	BNA	Tiêu dùng thiết yếu	0	0.3606	0	0.477243	0.477243	0.0929	0.1715	0.850846	0.019362	1.28544	-0.33179	-0.485086	0.355356	27.0818	0.075	0.075	0.34369	0.0234991	0.238128	0.0929	-0.107376	27.5032	0.50994	0.156248	1.63741	0	0.0135501
2023	BNA	Tiêu dùng thiết yếu	0.3606	0.3606	0	-0.0474435	0.0474435	0.0464	0.1014	0.776432	-0.0139731	0.0234991	-0.0569328	-0.33179	0.50994	27.5032	0.014	-0.014	0.0700328	0.474614	0.113229	0.0464	-0.0171883	27.6979	0.549617	0.093198	1.63067	0	0.411513
2024	BNA	Tiêu dùng thiết yếu	0.2985	0.3606	0	-0.0215441	0.0215441	0.0396	0.1042	0.863763	0.0298551	0.474614	-0.0924624	-0.0569328	0.549617	27.6979	0.011	0.011	0.103262	0.274477	0.289728	0.0396	-0.0253587	28.1117	0.666666	0.191542	1.31311	0	0.20484
2020	BPC	Nguyên vật liệu	0.0059	0.49	0.49	-0.174441	0.174441	0.0248	0.0545	0.765225	0.00363618	-0.146027	0.0910856	0.0910856	0.527137	26.0506	0.054	-0.054	-0.0666856	-0.146027	0.0175913	0.0248	0.0910856	26.0506	0.527137	0.0191071	1.86079	0	-0.11581
2021	BPC	Nguyên vật liệu	0.0101	0.5426	0.49	-0.135817	0.135817	0.0193	0.0388	0.670332	0.00270665	-0.146027	0.126764	0.0910856	0.527137	26.0506	0.003	-0.003	-0.103964	0.0713126	0.0163875	0.0193	0.0303821	25.9338	0.47327	0.018418	2.07404	0	0.0588891
2022	BPC	Nguyên vật liệu	0.0074	0.5944	0.49	-0.0321376	0.0321376	0.0056	0.0115	0.73049	0.00320036	0.0713126	-0.0391509	0.126764	0.47327	25.9338	0.217	-0.217	0.0462509	-0.00201939	0.0130812	0.0056	-0.00921671	26.0567	0.54704	0.0115688	1.80687	0	-0.00140122
2023	BPC	Nguyên vật liệu	0.0058	0.6518	0.49	-0.0888626	0.0888626	0.0057	0.012	0.699303	0	-0.00201939	0.00888529	-0.0391509	0.54704	26.0567	0.018	-0.018	0.00451471	-0.173883	0.00724306	0.0057	0.00235761	25.9546	0.498174	0.00802125	1.99123	0	-0.13662
2024	BPC	Nguyên vật liệu	0.0058	0.6792	0.49	-0.204926	0.204926	0.006	0.0117	0.68444	0.00193117	-0.173883	0.0823246	0.00888529	0.498174	25.9546	0.058	0.058	-0.0523246	0.220649	0.00801818	0.006	0.0195319	25.9058	0.473255	0.00841907	2.09523	0	0.181316
2020	BST	Dịch vụ viễn thông	0.1199	0.4557	0.4	-0.104444	0.104444	0.0836	0.1088	1.22749	0.498215	0.254054	0.0286301	0.0286301	0.228861	23.6294	0.086	-0.086	-0.00863007	0.254054	0.0345236	0.0836	0.0286301	23.6294	0.228861	0.0344481	4.06126	0	0.0813007
2021	BST	Dịch vụ viễn thông	0.0854	0.556	0.4	0.0898786	0.0898786	0.077	0.1068	1.0655	0	0.254054	-0.055916	0.0286301	0.228861	23.6294	0.55	0.550	0.051516	0.385338	0.0280558	0.077	-0.0139943	23.7748	0.321711	0.0242573	2.94864	0	0.114292
2022	BST	Dịch vụ viễn thông	0.0923	0.556	0.4	-1.22859	1.22859	0.0892	0.1412	1.17301	0.00198832	0.385338	0.50431	-0.055916	0.321711	23.7748	0.196	0.196	-0.45191	1.52857	0.0215299	0.0892	0.135232	23.9485	0.407928	0.0180967	2.33613	0	0.470589
2023	BST	Dịch vụ viễn thông	0.0789	0.5571	0.4	-0.182319	0.182319	0.0847	0.1464	1.01596	0	1.52857	0.0175805	0.50431	0.407928	23.9485	0.045	0.045	0.0514195	-0.0295565	0.0165067	0.0847	0.00477592	24.0342	0.4341	0.0151509	2.20754	0	-0.00736137
2024	BST	Dịch vụ viễn thông	0.0798	0.5571	0.4	0.346135	0.346135	0.0612	0.105	1.03595	0.0557484	-0.0295565	-0.135702	0.0175805	0.4341	24.0342	0.353	-0.353	0.169602	-0.600127	0.0471251	0.0612	-0.0353783	23.9628	0.398087	0.0506135	2.31323	0	-0.164051
2020	BTS	Nguyên vật liệu	0	0.9051	0.7951	-0.127419	0.127419	0.0051	0.0123	0.98079	0.0228779	-0.054085	0.0587766	0.0587766	0.571701	28.8134	0.072	0.072	0.00982335	-0.054085	0.709901	0.0051	0.0587766	28.8134	0.571701	0.763549	0.320172	1	-0.0583278
2021	BTS	Nguyên vật liệu	0	0.905	0.795	-0.159602	0.159602	0.0158	0.0352	0.822142	0.0174412	-0.054085	0.0853883	0.0587766	0.571701	28.8134	0.065	-0.065	0.0458117	-0.025668	0.713726	0.0158	0.0205698	28.753	0.528419	0.758146	0.360399	0	-0.0273307
2022	BTS	Nguyên vật liệu	0	0.902	0.795	-0.0296135	0.0296135	0.0169	0.0377	0.773011	0.0353059	-0.025668	0.0285566	0.0853883	0.528419	28.753	0.017	0.017	0.0169434	0.0473006	0.709938	0.0169	0.0069237	28.8324	0.572316	0.655767	0.526576	1	0.048746
2023	BTS	Nguyên vật liệu	0	0.9022	0.7951	-0.0242939	0.0242939	-0.0282	-0.0716	0.814095	0.0950192	0.0473006	0.0376648	0.0285566	0.572316	28.8324	0.002	0.002	0.0076352	-0.165969	0.605548	-0.0282	0.0097897	28.8834	0.63751	0.575427	0.453308	1	-0.176563
2024	BTS	Nguyên vật liệu	0	0.9023	0.7952	-0.0671144	0.0671144	-0.0612	-0.1729	0.851025	0.0350192	-0.165969	0.0416531	0.0376648	0.63751	28.8834	0.145	-0.145	0.0109469	0.0103797	0.633625	-0.0612	0.0106789	28.7606	0.655357	0.716424	0.372634	1	0.014112
2020	BTW	Dịch vụ tiện ích	0.0001	0.8824	0.5315	-0.850291	0.850291	0.1279	0.1813	1.41503	0.0485079	-0.0488702	0.169065	0.169065	0.262614	26.376	0.056	-0.056	-0.0276651	-0.0488702	0.554301	0.1279	0.169065	26.376	0.262614	0.537914	1.93338	0	-0.0289186
2021	BTW	Dịch vụ tiện ích	0.0001	0.8824	0.5315	-0.775432	0.775432	0.0879	0.1193	1.16037	0.0787049	-0.0488702	0.174364	0.169065	0.262614	26.376	0.088	-0.088	-0.0451644	-0.225639	0.575453	0.0879	0.0442451	26.4152	0.263723	0.55336	1.98473	0	-0.141685
2022	BTW	Dịch vụ tiện ích	0.0512	0.5315	0.5315	-1.23795	1.23795	0.1204	0.176	1.17593	0.158355	-0.225639	0.470699	0.174364	0.263723	26.4152	0.046	-0.046	-0.341399	0.266703	0.609762	0.1204	0.119978	26.671	0.357002	0.472128	1.56413	0	0.202905
2023	BTW	Dịch vụ tiện ích	0.0512	0.6315	0.5315	-0.833182	0.833182	0.116	0.1779	1.42743	0.109129	0.266703	0.0916738	0.470699	0.357002	26.671	0.106	-0.106	-0.100374	0.159468	0.48716	0.116	0.0258341	26.6351	0.337816	0.50498	1.52816	0	0.13026
2024	BTW	Dịch vụ tiện ích	0	0.8866	0.5315	-1.00542	1.00542	0.1255	0.186	1.31185	0.0942988	0.159468	0.159698	0.0916738	0.337816	26.6351	0.013	0.013	-0.146798	0.085707	0.531778	0.1255	0.0392074	26.6653	0.313633	0.51597	1.5684	0	0.0597546
2020	BXH	Nguyên vật liệu	0.0302	0.8096	0.4899	-0.17886	0.17886	0.0283	0.069	0.9417	0.00288809	-0.171716	0.0675927	0.0675927	0.59647	25.6928	0.018	0.018	-0.0468927	-0.171716	0.0425744	0.0283	0.0675927	25.6928	0.59647	0.0409603	1.60786	0	-0.104458
2021	BXH	Nguyên vật liệu	0.0302	0.8096	0.4899	-0.209183	0.209183	0.0119	0.0286	0.821187	0.015861	-0.171716	0.106214	0.0675927	0.59647	25.6928	0.068	0.068	-0.194014	0.177873	0.0445904	0.0119	0.0270665	25.5887	0.570434	0.0494809	1.66195	0	0.125586
2022	BXH	Nguyên vật liệu	0.0277	0.8096	0.4899	-0.288114	0.288114	0.0131	0.0279	0.986722	-0.000946025	0.177873	0.0653167	0.106214	0.570434	25.5887	0.022	0.022	-0.172917	-0.11284	0.0362015	0.0131	0.0154803	25.4079	0.485963	0.0433771	1.96705	0	-0.063785
2023	BXH	Nguyên vật liệu	0.029	0.6703	0.4899	-0.178458	0.178458	0.0108	0.0217	0.91117	0.00677648	-0.11284	-0.00713661	0.0653167	0.485963	25.4079	0.019	-0.019	0.203137	0.0215274	0.0385594	0.0108	-0.00162328	25.4589	0.514644	0.03664	1.85272	0	0.0108477
2024	BXH	Nguyên vật liệu	0.029	0.4899	0.4899	-0.255633	0.255633	0.0054	0.0104	0.905946	0.00592823	0.0215274	0.128008	-0.00713661	0.514644	25.4589	0.035	-0.035	-0.111608	-0.412722	0.0262025	0.0054	0.0328187	25.3049	0.440294	0.0305666	2.1859	0	-0.216518
2020	C69	Tiêu dùng không thiết yếu	0.3033	0.2339	0	0.212322	0.212322	0.032	0.0546	1.34131	0.198728	-0.173566	-0.222425	-0.222425	0.313804	26.851	0.291	0.291	0.249725	-0.173566	0.103338	0.032	-0.222425	26.851	0.313804	0.077864	2.47862	0	-0.154778
2021	C69	Tiêu dùng không thiết yếu	0.2054	0.393	0	0.675259	0.675259	0.0244	0.0353	0.607313	0.31781	-0.173566	-0.245626	-0.222425	0.313804	26.851	0.342	-0.342	0.258926	0.023347	0.0846909	0.0244	-0.0700392	27.5243	0.213442	0.043194	5.30643	0	0.0326912
2022	C69	Tiêu dùng không thiết yếu	0.2114	0.3255	0	0.25043	0.25043	0.0228	0.0406	0.737818	0.0155803	0.023347	-0.152654	-0.245626	0.213442	27.5243	0.213	-0.213	0.168754	0.789714	0.0496637	0.0228	-0.0505472	27.9434	0.443668	0.0326612	2.20189	0	2.09948
2023	C69	Tiêu dùng không thiết yếu	0.1939	0.3255	0	-0.0528491	0.0528491	0.0071	0.0147	0.673477	0.0138025	0.789714	0.0498044	-0.152654	0.443668	27.9434	0.641	0.641	-0.0340044	0.147515	0.0256446	0.0071	0.0150226	27.9139	0.375406	0.0264122	2.52657	0	0.192396
2024	C69	Tiêu dùng không thiết yếu	0.1635	0.217	0	-0.00302628	0.00302628	0.0134	0.0202	0.629174	0.0399051	0.147515	0.104232	0.0498044	0.375406	27.9139	0.191	-0.191	0.0447679	-0.0749861	0.0259834	0.0134	0.0256738	27.8063	0.286875	0.0289347	3.09383	0	-0.0796365
2020	CAG	Công nghiệp	0.0387	0.8035	0.5298	-0.144783	0.144783	0.03	0.0312	1.77402	0.0221463	-0.0818846	0.0897242	0.0897242	0.0392218	25.7571	0.047	-0.047	0.0616758	-0.0818846	0.479569	0.03	0.0897242	25.7571	0.0392218	0.476757	11.8515	0	-0.179475
2021	CAG	Công nghiệp	0.0014	0.713	0.5298	-0.101039	0.101039	0.0343	0.0359	0.799677	0.00211362	-0.0818846	0.0495739	0.0897242	0.0392218	25.7571	0.044	-0.044	0.0761261	-0.0246645	0.432143	0.0343	0.0124299	25.7701	0.045488	0.426577	13.6465	0	-0.0662729
2022	CAG	Công nghiệp	0.0016	0.6409	0.5298	-0.127542	0.127542	0.0401	0.0421	0.671619	0.0178347	-0.0246645	0.0417578	0.0495739	0.045488	25.7701	0.05	-0.050	-0.0384578	0.139167	0.399255	0.0401	0.0105071	25.7825	0.0494284	0.394325	12.0237	0	0.405705
2023	CAG	Công nghiệp	0.0016	0.8799	0.5298	-0.0421535	0.0421535	0.02	0.0209	0.760483	0.00345118	0.139167	0.0282545	0.0417578	0.0494284	25.7825	0.004	0.004	-0.00405453	-0.101052	0.351964	0.02	0.00710751	25.7476	0.0344769	0.364488	20.8266	0	-0.212188
2024	CAG	Công nghiệp	0.0016	0.7712	0.5298	0.0273376	0.0273376	-0.0044	-0.0046	0.769091	0.014755	-0.101052	-0.00477992	0.0282545	0.0344769	25.7476	0.105	0.105	-0.00702008	-0.136197	0.322788	-0.0044	-0.00117409	25.7213	0.0330601	0.331387	24.7165	0	-0.350539
2020	CAN	Tiêu dùng thiết yếu	0.1774	0.2841	0	-0.412632	0.412632	0.0524	0.1451	1.35953	0.0589027	0.54361	-0.0239344	-0.0239344	0.67384	26.7082	0.175	0.175	0.105034	0.54361	0.188587	0.0524	-0.0239344	26.7082	0.67384	0.139229	1.2621	1	0.277451
2021	CAN	Tiêu dùng thiết yếu	0.0272	0.6412	0.2775	-0.492992	0.492992	0.069	0.2121	1.15768	0.0145904	0.54361	-0.0639765	-0.0239344	0.67384	26.7082	0.051	0.051	0.147377	0.326449	0.147772	0.069	-0.0184023	26.8431	0.675046	0.129127	1.29099	1	0.176666
2022	CAN	Tiêu dùng thiết yếu	0.0276	0.6983	0.2775	-0.0945114	0.0945114	0.0339	0.1084	1.39238	0.00530856	0.326449	-0.137971	-0.0639765	0.675046	26.8431	0.081	0.081	0.215871	-0.127525	0.114266	0.0339	-0.0368154	26.9178	0.698608	0.106039	1.28451	1	-0.0671206
2023	CAN	Tiêu dùng thiết yếu	0.0272	0.7085	0.2775	-0.642499	0.642499	0.027	0.0806	1.29348	0.00230189	-0.127525	0.121601	-0.137971	0.698608	26.9178	0.052	0.052	-0.0423013	-0.131608	0.0935439	0.027	0.0315355	26.7218	0.623251	0.113798	1.43463	0	-0.0800138
2024	CAN	Tiêu dùng thiết yếu	0.0033	0.3448	0.2775	-1.11076	1.11076	0.0062	0.0143	1.43275	0.0141007	-0.131608	0.331172	0.121601	0.623251	26.7218	0.12	0.120	-0.253272	-0.148372	0.101428	0.0062	0.0747053	26.3816	0.490859	0.14254	1.78317	0	-0.0806002
2020	CCR	Công nghiệp	0.0031	0.9517	0.809	-0.23728	0.23728	0.0686	0.0855	2.05932	0.0103459	-0.0595947	0.0905909	0.0905909	0.130403	26.4998	0.016	0.016	-0.0286909	-0.0595947	0.816718	0.0686	0.0905909	26.4998	0.130403	0.911344	1.05762	0	-0.134203
2021	CCR	Công nghiệp	0.1461	0.9436	0.8009	-0.458136	0.458136	0.1312	0.1485	1.00514	0.0163228	-0.0595947	0.172599	0.0905909	0.130403	26.4998	0.175	-0.175	-0.103199	0.175199	0.858314	0.1312	0.0407869	26.5122	0.0751042	0.847708	2.34889	0	0.408377
2022	CCR	Công nghiệp	0.1461	0.9436	0.8009	-0.161465	0.161465	0.0455	0.0504	0.983257	0.0763064	0.175199	0.0564022	0.172599	0.0751042	26.5122	0.044	0.044	0.0168978	-0.131828	0.813765	0.0455	0.0141882	26.4522	0.0912142	0.864145	2.45346	0	-0.220911
2023	CCR	Công nghiệp	0.1457	0.9517	0.809	-0.203876	0.203876	0.0453	0.0508	1.17202	0.00373642	-0.131828	0.0793491	0.0564022	0.0912142	26.4522	0.096	-0.096	-0.0607491	-0.0271992	0.863883	0.0453	0.0192416	26.4519	0.0964486	0.864155	2.11586	0	-0.0550922
2024	CCR	Công nghiệp	0.1456	0.9517	0.809	-0.312449	0.312449	0.0526	0.0586	1.16542	0.0384788	-0.0271992	0.13804	0.0793491	0.0964486	26.4519	0.059	-0.059	-0.11954	0.110629	0.842579	0.0526	0.0345046	26.475	0.10874	0.823314	1.98652	0	0.237071
2020	CDN	Công nghiệp	0.0013	0.9529	0.75	-0.349982	0.349982	0.1238	0.1517	1.79428	0.0404911	0.0485099	0.169339	0.169339	0.182781	28.1734	0.076	0.076	-0.150639	0.0485099	0.583731	0.1238	0.169339	28.1734	0.182781	0.564102	4.996	0	0.0978902
2021	CDN	Công nghiệp	0.0005	0.9529	0.75	-0.422255	0.422255	0.1383	0.1681	1.71501	0.0492696	0.0485099	0.193303	0.169339	0.182781	28.1734	0.048	-0.048	-0.140603	0.101441	0.529894	0.1383	0.0491523	28.213	0.171555	0.50934	4.71913	0	0.192939
2022	CDN	Công nghiệp	0	0.9529	0.75	-0.457792	0.457792	0.1414	0.1774	1.52776	0.15203	0.101441	0.178457	0.193303	0.171555	28.213	0.172	-0.172	-0.0892573	0.065651	0.576235	0.1414	0.0454967	28.3534	0.229809	0.500729	3.85906	0	0.108895
2023	CDN	Công nghiệp	0.9539	0.9526	0.75	-0.392462	0.392462	0.1292	0.168	1.7248	0.0938119	0.065651	0.157254	0.178457	0.229809	28.3534	0.166	-0.166	-0.0958538	0.0189105	0.478204	0.1292	0.0420697	28.4205	0.232349	0.447181	4.67967	0	0.032552
2024	CDN	Công nghiệp	0.794	0.9529	0.75	-0.4482	0.4482	0.1293	0.1712	1.62415	0.076179	0.0189105	0.195197	0.157254	0.232349	28.4205	0.166	-0.166	-0.181597	0.0986704	0.654073	0.1293	0.0504352	28.5313	0.255958	0.585508	3.74497	0	0.175906
2020	CEO	Bất động sản	0.2837	0.42	0	-0.106578	0.106578	-0.0087	-0.0228	2.5281	0.056882	-0.401403	0.0351676	0.0351676	0.535329	29.6377	0.379	0.379	0.0784324	-0.401403	0.167472	-0.0087	0.0351676	29.6377	0.535329	0.18096	1.1919	0	-0.709051
2021	CEO	Bất động sản	0.2828	0.274	0	-0.00895917	0.00895917	0.0129	0.0315	1.21776	-0.0530563	-0.401403	-0.022475	0.0351676	0.535329	29.6377	0.271	-0.271	0.119875	-0.0567369	0.194154	0.0129	-0.00540123	29.5841	0.498677	0.204845	1.16946	0	-0.318789
2022	CEO	Bất động sản	0.2782	0.274	0	-0.112219	0.112219	0.0395	0.089	1.26052	-0.017721	-0.0567369	0.0647693	-0.022475	0.498677	29.5841	0.155	0.155	0.0198307	0.233642	0.198229	0.0395	0.0157585	29.5855	0.473244	0.197936	1.5091	0	1.82653
2023	CEO	Bất động sản	0.1391	0.2716	0	-0.0796878	0.0796878	0.0183	0.0327	1.08542	0.0419623	0.233642	-0.00422851	0.0647693	0.473244	29.5855	0.032	0.032	0.0734285	-0.163661	0.193115	0.0183	-0.00105791	29.8744	0.337278	0.144669	2.32715	0	-0.453325
2024	CEO	Bất động sản	0.1949	0.2716	0	-0.0208932	0.0208932	0.0207	0.0303	1.09166	0.0473231	-0.163661	-0.0082055	-0.00422851	0.337278	29.8744	0.04	-0.040	0.111606	-0.00907562	0.229075	0.0207	-0.00234559	29.8235	0.295312	0.241024	2.53872	0	-0.0613836
2020	CIA	Công nghiệp	0.0486	0.5431	0	0.109107	0.109107	-0.0878	-0.1145	0.88375	0.0143565	-0.409008	-0.0656004	-0.0656004	0.222339	26.7352	0.141	0.141	0.1318	-0.409008	0.283394	-0.0878	-0.0656004	26.7352	0.222339	0.325764	2.75398	0	-0.656022
2021	CIA	Công nghiệp	0.0521	0.4882	0	0.139905	0.139905	-0.1076	-0.1437	0.835582	0.000274601	-0.409008	-0.0729964	-0.0656004	0.222339	26.7352	0.034	-0.034	0.136296	-0.14464	0.277133	-0.1076	-0.0169798	26.5271	0.223312	0.341227	2.56508	0	-0.586718
2022	CIA	Công nghiệp	0.0511	0.5431	0	0.0565464	0.0565464	0.196	0.2282	0.718165	-0.206766	-0.14464	-0.123832	-0.0729964	0.223312	26.5271	0.023	-0.023	0.181932	0.194687	0.0243769	0.196	-0.0277492	26.5428	0.0393679	0.0239969	23.278	0	1.55195
2023	CIA	Công nghiệp	0.0488	0.5431	0	-0.0207071	0.0207071	0.0164	0.0172	0.614882	0.00463067	0.194687	-0.0498067	-0.123832	0.0393679	26.5428	0.073	-0.073	0.110107	-0.0352714	0.0183232	0.0164	-0.0125495	26.5522	0.0409822	0.0181519	21.2041	0	-0.111922
2024	CIA	Công nghiệp	0.0091	0.5963	0	-0.1189	0.1189	0.0131	0.0138	0.605987	-0.00358148	-0.0352714	-0.0319223	-0.0498067	0.0409822	26.5522	0.044	-0.044	0.0942223	0.0848217	0.0136786	0.0131	-0.00801808	26.577	0.0544902	0.0133441	15.8792	0	0.305935
2020	CKV	Dịch vụ viễn thông	0.0295	0.666	0.49	-0.218199	0.218199	0.0026	0.0052	1.01221	0.0440231	0.220089	0.124343	0.124343	0.470359	25.7887	0.098	0.098	-0.0133434	0.220089	0.231856	0.0026	0.124343	25.7887	0.470359	0.275811	1.32354	0	0.105777
2021	CKV	Dịch vụ viễn thông	0.0288	0.666	0.49	-0.127601	0.127601	0.0273	0.0542	0.982378	0.0148288	0.220089	0.109646	0.124343	0.470359	25.7887	0.014	0.014	-0.0466463	0.30546	0.21853	0.0273	0.0250382	25.8614	0.521297	0.203209	1.28757	0	0.111606
2022	CKV	Dịch vụ viễn thông	0.0162	0.6065	0.49	0.0688455	0.0688455	0.0133	0.0265	0.813469	0.00899807	0.30546	-0.113632	0.109646	0.521297	25.8614	0.153	0.153	0.183932	0.429497	0.175674	0.0133	-0.0294399	25.7629	0.472485	0.193875	1.40278	0	0.151814
2023	CKV	Dịch vụ viễn thông	0.0162	0.6077	0.49	-0.197123	0.197123	0.0161	0.0308	0.812239	-0.00933088	0.429497	0.120784	-0.113632	0.472485	25.7629	0.13	0.130	-0.069384	1.65191	0.175194	0.0161	0.0287088	25.7471	0.479175	0.17797	1.41009	0	0.459345
2024	CKV	Dịch vụ viễn thông	0.009	0.7039	0.49	0.313508	0.313508	0.0158	0.0355	0.874491	0.0165213	1.65191	-0.129275	0.120784	0.479175	25.7471	0.122	0.122	0.167375	0.644101	0.19561	0.0158	-0.0320647	26.0164	0.61235	0.149437	1.32731	0	0.120815
2020	CLH	Nguyên vật liệu	0.011	0.5138	0.5138	-0.424468	0.424468	0.149	0.2522	1.42162	0.0503154	0.0751106	0.220079	0.220079	0.38313	26.4475	0.02	0.020	-0.213379	0.0751106	0.680098	0.149	0.220079	26.4475	0.38313	0.686878	0.828962	0	0.0336807
2021	CLH	Nguyên vật liệu	0.0117	0.5138	0.5138	-0.703741	0.703741	0.1776	0.2774	1.46077	0.0309303	0.0751106	0.412011	0.220079	0.38313	26.4475	0.089	-0.089	-0.395411	0.0681614	0.545651	0.1776	0.102492	26.4518	0.336951	0.543324	1.24745	0	0.0292769
2022	CLH	Nguyên vật liệu	0.0064	0.5138	0.5138	-0.572974	0.572974	0.1788	0.2752	1.34063	0.0144748	0.0681614	0.293102	0.412011	0.336951	26.4518	0.032	-0.032	-0.274002	0.253714	0.406407	0.1788	0.073432	26.4892	0.363308	0.391494	1.62711	0	0.10633
2023	CLH	Nguyên vật liệu	0.0004	0.5138	0.5138	-0.244561	0.244561	0.1514	0.2356	1.20987	0.00430654	0.253714	0.103616	0.293102	0.363308	26.4892	0.078	-0.078	-0.0770162	-0.478076	0.295768	0.1514	0.0263882	26.4381	0.351418	0.311271	1.88694	0	-0.188
2024	CLH	Nguyên vật liệu	0.0013	0.6374	0.5138	-0.592159	0.592159	0.1257	0.1948	1.19255	0.024336	-0.478076	0.257509	0.103616	0.351418	26.4381	0.142	-0.142	-0.230409	0.00658493	0.296595	0.1257	0.0627332	26.4667	0.358275	0.288242	1.8881	0	0.00303018
2020	CMC	Công nghiệp	0.4418	0.6371	0	0.341833	0.341833	0.0033	0.0071	0.973885	-0.00743525	0.188696	-0.221971	-0.221971	0.582788	25.6645	0.349	0.349	0.222571	0.188696	0.00631046	0.0033	-0.221971	25.6645	0.582788	0.00511505	1.18197	0	0.418469
2021	CMC	Công nghiệp	0.4418	0.6373	0	0.0472309	0.0472309	0.0242	0.056	0.729738	0	0.188696	0.0452817	-0.221971	0.582788	25.6645	0.418	0.418	-0.0437817	-0.255973	0.00201517	0.0242	0.0125048	25.6458	0.550414	0.00205331	1.20799	0	-0.493726
2022	CMC	Công nghiệp	0.4418	0.5252	0	0.446717	0.446717	-0.0118	-0.0288	0.782615	0.0253536	-0.255973	-0.218321	0.0452817	0.550414	25.6458	0.175	0.175	0.219021	0.0915294	0.0581004	-0.0118	-0.0540686	25.789	0.621466	0.0503468	1.10419	0	0.342234
2023	CMC	Công nghiệp	0.4418	0.5866	0	-0.0706924	0.0706924	0.0046	0.0116	0.772706	0.00362243	0.0915294	0.0842216	-0.218321	0.621466	25.789	0.104	0.104	-0.0839216	0.00904604	0.0486246	0.0046	0.0225608	25.7112	0.58607	0.0525606	1.13285	0	0.0290803
2024	CMC	Công nghiệp	0.4418	0.7209	0	0.207483	0.207483	0.001	0.0024	0.77806	0.00713155	0.00904604	-0.136611	0.0842216	0.58607	25.7112	0.05	0.050	0.139111	0.190304	0.0464896	0.001	-0.0328244	25.7925	0.617465	0.0428604	1.14852	0	0.549965
2020	CPC	Nguyên vật liệu	0.1759	0.4967	0	-0.556671	0.556671	0.0811	0.1274	1.13656	0.00479349	-0.597418	0.269375	0.269375	0.361994	25.5735	0.032	0.032	-0.0593754	-0.597418	0.0902032	0.0811	0.269375	25.5735	0.361994	0.0896883	2.43775	0	-0.283488
2021	CPC	Nguyên vật liệu	0.1721	0.4967	0	-0.806935	0.806935	0.0834	0.1262	0.846099	0.0312089	-0.597418	0.438011	0.269375	0.361994	25.5735	0.01	-0.010	-0.209311	-0.0127581	0.0899658	0.0834	0.109816	25.524	0.315276	0.0945379	2.76745	0	-0.00849774
2022	CPC	Nguyên vật liệu	0.1225	0.4967	0	-0.132763	0.132763	0.0779	0.1148	0.917547	0.050474	-0.0127581	-0.00243991	0.438011	0.315276	25.524	0.004	0.004	0.23474	-0.01315	0.120099	0.0779	-0.000594861	25.5415	0.326424	0.118007	2.62188	0	-0.00840665
2023	CPC	Nguyên vật liệu	0.1225	0.4967	0	-0.764065	0.764065	0.0793	0.1209	0.9398	0.0249023	-0.01315	0.267451	-0.00243991	0.326424	25.5415	0.091	0.091	-0.0617506	0.00612636	0.118663	0.0793	0.06745	25.6188	0.360435	0.109842	2.40674	0	0.00401971
2024	CPC	Nguyên vật liệu	0.1225	0.5226	0	-0.327274	0.327274	0.0779	0.1164	0.895875	0.0231364	0.00612636	0.00955345	0.267451	0.360435	25.6188	0.081	0.081	0.0505466	0.0049764	0.121832	0.0779	0.00248057	25.5373	0.299686	0.132177	2.81152	0	0.00351329
2020	CTB	Công nghiệp	0.173	0.4342	0	-0.433116	0.433116	0.0629	0.1502	1.25706	0.0478646	-0.233207	0.138942	0.138942	0.594336	27.0575	0.058	-0.058	-0.0360419	-0.233207	0.159113	0.0629	0.138942	27.0575	0.594336	0.145441	1.48035	0	-0.20627
2021	CTB	Công nghiệp	0.1583	0.4342	0	0.296433	0.296433	0.0398	0.1115	1.01852	0.0206519	-0.233207	0.0444507	0.138942	0.594336	27.0575	0.267	0.267	0.0102493	0.26269	0.148494	0.0398	0.0116116	27.3134	0.680225	0.114963	2.02226	0	0.320245
2022	CTB	Công nghiệp	0.1134	0.4342	0	-0.208664	0.208664	0.0619	0.2024	0.997615	0.00829271	0.26269	-0.148122	0.0444507	0.680225	27.3134	0.238	0.238	0.166022	0.564173	0.103717	0.0619	-0.0417436	27.5041	0.705623	0.0857128	1.10277	0	0.672895
2023	CTB	Công nghiệp	0.1134	0	0	-0.555798	0.555798	0.0694	0.1862	0.980351	0.011974	0.564173	0.266096	-0.148122	0.705623	27.5041	0.062	0.062	-0.262396	-0.0336633	0.0758671	0.0694	0.0728466	27.0899	0.507955	0.114802	1.27567	0	-0.029042
2024	CTB	Công nghiệp	0.1325	0	0	-0.174508	0.174508	0.0733	0.1602	0.945162	0.0228456	-0.0336633	0.0423523	0.266096	0.507955	27.0899	0.021	0.021	0.0305477	-0.526637	0.201602	0.0733	0.00842596	27.2874	0.570964	0.165457	1.49709	0	-0.309232
2020	CTT	Công nghiệp	0.0081	0.486	0.4098	0.0183781	0.0183781	0.0186	0.1608	1.006	0.0368137	-0.0172321	0.0212016	0.0212016	0.886735	27.0285	0.018	-0.018	0.00309836	-0.0172321	0.348917	0.0186	0.0212016	27.0285	0.886735	0.31627	0.773748	0	-0.00569763
2021	CTT	Công nghiệp	0.0081	0.486	0.4098	-0.202753	0.202753	0.0185	0.1603	1.0022	0.0247045	-0.0172321	0.0584417	0.0212016	0.886735	27.0285	0.034	-0.034	-0.0116417	1.05404	0.288323	0.0185	0.0153275	27.0283	0.882047	0.288377	0.807109	0	0.386688
2022	CTT	Công nghiệp	0.0081	0.5719	0.4098	-0.018035	0.018035	0.0175	0.1641	1.02404	0.0275467	1.05404	0.0271927	0.0584417	0.882047	27.0283	0.095	-0.095	0.0167073	0.34909	0.250401	0.0175	0.00679753	27.227	0.903013	0.205296	0.882258	0	0.0923376
2023	CTT	Công nghiệp	0.0129	0.5724	0.4098	-0.034922	0.034922	0.0178	0.1835	1.00566	0.0315142	0.34909	0.225844	0.0271927	0.903013	27.227	0.023	0.023	-0.193244	0.0246763	0.192103	0.0178	0.0620495	27.2545	0.90299	0.186877	0.905973	0	0.00728819
2024	CTT	Công nghiệp	0.0108	0.5814	0.4098	-0.215504	0.215504	0.0187	0.1969	1.00252	0.0247074	0.0246763	0.0985106	0.225844	0.90299	27.2545	0.095	0.095	-0.0553106	0.0230963	0.142838	0.0187	0.0249673	27.3265	0.906975	0.13292	0.942969	0	0.00696156
2020	D11	Bất động sản	0.4131	0.5831	0.2	0.312207	0.312207	0.0527	0.2862	1.08826	0	-0.325475	-0.211901	-0.211901	0.802195	27.2045	0.082	-0.082	0.274301	-0.325475	0.00702672	0.0527	-0.211901	27.2045	0.802195	0.00691782	1.35642	0	-0.526345
2021	D11	Bất động sản	0.3125	0.4366	0.2	-0.423028	0.423028	0.0892	0.3075	0.747642	0	-0.325475	-0.0133477	-0.211901	0.802195	27.2045	0.086	0.086	0.0655477	0.16894	0.0065026	0.0892	-0.00336298	26.6251	0.545199	0.0116064	1.4264	0	0.585878
2022	D11	Bất động sản	0.2791	0.4366	0.2	-0.243485	0.243485	0.0614	0.1248	0.717285	0	0.16894	0.0787339	-0.0133477	0.545199	26.6251	0.068	0.068	-0.0146339	-0.450053	0.0108652	0.0614	0.014136	26.5667	0.46848	0.0115187	1.74401	0	-0.551391
2023	D11	Bất động sản	0.2725	0.4366	0.2	-0.0662486	0.0662486	0.0136	0.0257	0.660275	0	-0.450053	0.0691796	0.0787339	0.46848	26.5667	0.121	-0.121	0.0373204	-0.287083	0.010733	0.0136	0.01679	26.5841	0.469877	0.0105486	1.74738	0	-0.739557
2024	D11	Bất động sản	0.3043	0.4366	0.2	0.0101078	0.0101078	0.0109	0.0208	0.684648	0.0334258	-0.287083	-0.051619	0.0691796	0.469877	26.5841	0.153	-0.153	0.155419	0.203467	0.0101586	0.0109	-0.0130166	26.622	0.481352	0.00978064	1.73692	0	2.04772
2020	DAD	Dịch vụ viễn thông	0.0108	0.6607	0.4454	-0.921374	0.921374	0.1233	0.163	1.36709	-0.0443177	0.173428	0.209942	0.209942	0.233696	25.4579	0.056	0.056	-0.219542	0.173428	0.171606	0.1233	0.209942	25.4579	0.233696	0.168621	3.2852	0	0.112798
2021	DAD	Dịch vụ viễn thông	0.0108	0.7014	0.4454	-0.765435	0.765435	0.1136	0.1549	0.966899	0.00682046	0.173428	0.0555071	0.209942	0.233696	25.4579	0.055	-0.055	0.0495929	0.617524	0.162473	0.1136	0.0139985	25.5877	0.295611	0.142685	2.71288	0	0.367317
2022	DAD	Dịch vụ viễn thông	0.0108	0.4454	0.4454	-0.964517	0.964517	0.0974	0.1557	0.99728	0.0206672	0.617524	0.239971	0.0555071	0.295611	25.5877	0.098	-0.098	-0.139771	0.809401	0.151921	0.0974	0.0638831	25.8439	0.435902	0.117586	1.92699	0	0.400944
2023	DAD	Dịch vụ viễn thông	0.007	0.709	0.4454	-0.753382	0.753382	0.0846	0.1467	1.04174	0.00168182	0.809401	0.0514139	0.239971	0.435902	25.8439	0.039	-0.039	0.0905861	0.437629	0.107819	0.0846	0.014491	25.8377	0.410746	0.108495	2.06751	0	0.199925
2024	DAD	Dịch vụ viễn thông	0.007	0.7288	0.4454	-0.711809	0.711809	0.0692	0.1167	1.01198	0.0013631	0.437629	0.112958	0.0514139	0.410746	25.8377	0.105	-0.105	0.00834164	0.361748	0.0979907	0.0692	0.0281514	25.8185	0.404035	0.0998891	2.12034	0	0.136868
2020	DAE	Dịch vụ viễn thông	0.0017	0.5929	0.2941	-0.583549	0.583549	0.1034	0.1346	1.05865	0.132323	-0.249109	0.155468	0.155468	0.271236	24.644	0.004	-0.004	-0.0939676	-0.249109	0.266231	0.1034	0.155468	24.644	0.271236	0.227961	2.72477	0	-0.170796
2021	DAE	Dịch vụ viễn thông	0.0017	0.6934	0.2941	-0.0247276	0.0247276	0.1019	0.1315	0.863286	0.0144623	-0.249109	-0.101615	0.155468	0.271236	24.644	0.038	-0.038	0.176815	0.116656	0.236758	0.1019	-0.0273709	24.5697	0.175185	0.255013	4.18292	0	0.112649
2022	DAE	Dịch vụ viễn thông	0.0525	0.6258	0.2941	-0.340706	0.340706	0.061	0.0738	0.631427	-0.00748937	0.116656	0.030809	-0.101615	0.175185	24.5697	0.425	0.425	0.088191	0.1171	0.181626	0.061	0.00741632	24.5772	0.170816	0.180272	4.33236	0	0.0943544
2023	DAE	Dịch vụ viễn thông	0.0408	0.6258	0.2941	-0.284139	0.284139	0.0662	0.0789	0.759782	0.0260614	0.1171	0.00226008	0.030809	0.170816	24.5772	0.216	-0.216	0.13054	-0.146425	0.260118	0.0662	0.000567133	24.6195	0.153326	0.249346	4.79032	0	-0.108621
2024	DAE	Dịch vụ viễn thông	0.0524	0.636	0.2941	-0.395624	0.395624	0.0633	0.0758	0.823459	0.0247983	-0.146425	0.0522337	0.00226008	0.153326	24.6195	0.073	0.073	0.144866	0.204601	0.074239	0.0633	0.0133345	24.6506	0.174887	0.0719659	5.20679	0	0.177628
2020	DHP	Tiêu dùng không thiết yếu	0.2367	0.5112	0	-0.303303	0.303303	0.0581	0.0731	0.762199	0.00931144	-0.060915	0.161685	0.161685	0.170983	26.0007	0.099	0.099	-0.0289855	-0.060915	0.257446	0.0581	0.161685	26.0007	0.170983	0.276112	3.61991	0	-0.0458141
2021	DHP	Tiêu dùng không thiết yếu	0.2367	0.5112	0	-0.101293	0.101293	0.0603	0.0757	0.718754	0.0102626	-0.060915	0.0279665	0.161685	0.170983	26.0007	0.243	-0.243	0.0729335	-0.0239968	0.252153	0.0603	0.00674703	26.0916	0.231967	0.230262	2.8997	0	-0.0176358
2022	DHP	Tiêu dùng không thiết yếu	0.2193	0.5112	0	-0.0924862	0.0924862	0.0623	0.0834	0.74325	0.0215657	-0.0239968	0.0714544	0.0279665	0.231967	26.0916	0.015	-0.015	0.0135456	0.00652428	0.219981	0.0623	0.0186742	26.1678	0.271715	0.203824	2.58103	0	0.00534495
2023	DHP	Tiêu dùng không thiết yếu	0.357	0.6705	0	-0.13824	0.13824	0.0575	0.0751	0.742789	0.0103899	0.00652428	0.0320093	0.0714544	0.271715	26.1678	0.138	0.138	0.00249074	-0.148138	0.193791	0.0575	0.00830739	26.0797	0.191986	0.211646	3.57711	0	-0.130284
2024	DHP	Tiêu dùng không thiết yếu	0.357	0.6705	0	-0.261315	0.261315	0.065	0.0764	0.630193	0.0139995	-0.148138	0.105259	0.0320093	0.191986	26.0797	0.064	0.064	0.00904068	0.0417629	0.189196	0.065	0.025156	25.9932	0.102879	0.206285	6.66895	0	0.0386691
2020	DHT	Chăm sóc sức khỏe	0.3607	0.8744	0.5237	-0.31354	0.31354	0.111	0.2994	1.58676	0.119057	-0.048441	0.128271	0.128271	0.620005	27.5477	0.168	-0.168	-0.0718706	-0.048441	0.141964	0.111	0.128271	27.5477	0.620005	0.113908	1.29698	0	-0.0175103
2021	DHT	Chăm sóc sức khỏe	0.2701	0.382	0	-0.0589632	0.0589632	0.063	0.1287	1.19576	0.0655185	-0.048441	-0.0253169	0.128271	0.620005	27.5477	0.011	0.011	0.0327169	-0.431621	0.162634	0.063	-0.0070232	27.8442	0.391281	0.120905	2.10255	0	-0.197915
2022	DHT	Chăm sóc sức khỏe	0.2701	0.382	0	0.0401507	0.0401507	0.0703	0.1267	0.896683	0.19915	-0.431621	-0.0318937	-0.0253169	0.391281	27.8442	0.145	-0.145	0.153694	0.184254	0.114913	0.0703	-0.00914689	28.0159	0.456387	0.0967781	1.79517	0	0.14169
2023	DHT	Chăm sóc sức khỏe	0.2425	0.483	0	-0.324293	0.324293	0.0514	0.0939	4.68827	0.249229	0.184254	0.184279	-0.0318937	0.456387	28.0159	0.287	-0.287	-0.0503793	0.11018	0.104975	0.0514	0.0500165	28.2398	0.41948	0.0839166	1.69244	0	0.0881188
2024	DHT	Chăm sóc sức khỏe	0.2486	0.52	0	-0.0233345	0.0233345	0.0381	0.0676	4.5122	0.0742954	0.11018	0.0152094	0.184279	0.41948	28.2398	0.056	-0.056	0.0758906	0.047354	0.101926	0.0381	0.00422625	28.2866	0.451406	0.097268	1.20463	0	0.0435397
2020	DIH	Công nghiệp	0.1582	0.3429	0	0.265869	0.265869	0.002	0.008	1.44384	0	0.0769191	-0.19909	-0.19909	0.765554	26.6751	0.138	0.138	0.21339	0.0769191	0.0169557	0.002	-0.19909	26.6751	0.765554	0.015387	1.86883	0	0.183066
2021	DIH	Công nghiệp	0.0301	0.2516	0	2.5098	2.5098	0.0017	0.012	1.06304	0	0.0769191	-1.15295	-0.19909	0.765554	26.6751	0.588	0.588	1.11305	0.0014615	0.0117674	0.0017	-0.302218	27.5075	0.897538	0.00511881	1.14661	0	0.00323985
2022	DIH	Công nghiệp	0.0301	0.2516	0	0.178264	0.178264	0.0067	0.0648	1.06519	0	0.0014615	-0.0893974	-1.15295	0.897538	27.5075	0.368	0.368	0.0944974	0.00201521	0.00359787	0.0067	-0.0311489	27.5475	0.895748	0.00345679	1.16788	0	0.0102365
2023	DIH	Công nghiệp	0.2246	0.5584	0	-0.542692	0.542692	0.0166	0.1396	0.987222	0	0.00201521	0.366028	-0.0893974	0.895748	27.5475	0.065	0.065	-0.337628	0.125164	0.00218921	0.0166	0.0933369	27.3775	0.863618	0.00259511	2.05523	1	0.655028
2024	DIH	Công nghiệp	0.2201	0.4832	0	-0.318742	0.318742	0.0191	0.1184	0.984667	0.00086234	0.125164	0.135854	0.366028	0.863618	27.3775	0.128	0.128	-0.0677536	-0.0886619	0.00265873	0.0191	0.031082	27.1576	0.807568	0.00331257	1.3444	0	-0.236507
2020	DL1	Dịch vụ tiện ích	0.0096	0.552	0	-0.00210995	0.00210995	0.0266	0.0325	1.0408	-0.11588	-0.00934193	0.0215184	0.0215184	0.166145	27.9164	0.087	-0.087	0.0086816	-0.00934193	0.0267632	0.0266	0.0215184	27.9164	0.166145	0.0267393	1.1231	0	-0.0617643
2021	DL1	Dịch vụ tiện ích	0.0121	0.552	0	0.367451	0.367451	0.0271	0.0401	0.583262	0.212969	-0.00934193	-0.333821	0.0215184	0.166145	27.9164	0.179	-0.179	0.399321	-0.0660884	0.0434286	0.0271	-0.0834927	28.3295	0.427271	0.0287324	1.45434	0	-0.466126
2022	DL1	Dịch vụ tiện ích	0.011	0.4101	0	-0.152239	0.152239	0.0183	0.0413	0.714538	0.000962648	-0.0660884	0.0831827	-0.333821	0.427271	28.3295	0.032	-0.032	0.446617	0.0888202	0.389362	0.0183	0.0250309	28.7083	0.548125	0.266599	1.19532	0	1.77359
2023	DL1	Dịch vụ tiện ích	0.0116	0.4086	0	-0.0334554	0.0334554	0.0157	0.035	0.656194	0.00343268	0.0888202	-0.0129202	0.0831827	0.548125	28.7083	0.042	-0.042	0.25672	0.0006769	0.252561	0.0157	-0.00383454	28.5178	0.424219	0.305564	2.01009	0	0.00711737
2024	DL1	Dịch vụ tiện ích	0.0115	0.2401	0	0.0141234	0.0141234	0.0006	0.001	0.677241	0.0383209	0.0006769	-0.0782358	-0.0129202	0.424219	28.5178	0.094	-0.094	0.319736	0.100608	0.335909	0.0006	-0.0177015	28.575	0.466439	0.317221	2.10388	0	0.868179
2020	DNP	Dịch vụ tiện ích	0.1283	0.4441	0	-0.122382	0.122382	0.0015	0.0107	0.930031	0.110125	0.0644958	0.0299886	0.0299886	0.716921	29.9064	0.085	0.085	0.0130114	0.0644958	0.706254	0.0015	0.0299886	29.9064	0.716921	0.550846	1.21559	0	0.174893
2021	DNP	Dịch vụ tiện ích	0.1301	0.1603	0.0528	-0.0931734	0.0931734	0.0007	0.0058	0.920947	0.0654376	0.0644958	0.0162627	0.0299886	0.716921	29.9064	0.041	-0.041	0.0261373	0.303004	0.764059	0.0007	0.0045683	30.2729	0.721071	0.529603	1.29999	1	0.896648
2022	DNP	Dịch vụ tiện ích	0.1116	0.1603	0.0528	-0.0726006	0.0726006	0.0003	0.0029	0.867947	0.00225536	0.303004	-0.022331	0.0162627	0.721071	30.2729	0.048	-0.048	0.055431	0.103663	0.496756	0.0003	-0.00659455	30.4361	0.724065	0.421956	1.23083	1	0.233338
2023	DNP	Dịch vụ tiện ích	0.1583	0.1075	0	-0.120866	0.120866	0.0025	0.0261	0.864079	0.0414993	0.103663	0.0311188	-0.022331	0.724065	30.4361	0.078	-0.078	0.00178122	-0.00686305	0.354428	0.0025	0.0084131	30.4084	0.710234	0.364395	1.36212	1	-0.0147459
2024	DNP	Dịch vụ tiện ích	0.0429	0.2472	0	-0.145539	0.145539	0.0026	0.0081	0.819759	0.0427835	-0.00686305	0.039853	0.0311188	0.710234	30.4084	0.028	-0.028	-0.027353	0.0820445	0.452869	0.0026	0.0098251	30.5031	0.656248	0.411954	1.51638	0	0.174025
2020	DP3	Chăm sóc sức khỏe	0.3553	0.576	0.2207	-1.32056	1.32056	0.2814	0.352	2.31945	0.184849	-0.040855	0.33144	0.33144	0.215043	26.8131	0.018	0.018	-0.29264	-0.040855	0.224665	0.2814	0.33144	26.8131	0.215043	0.187924	2.68473	0	-0.0367155
2021	DP3	Chăm sóc sức khỏe	0.3553	0.576	0.2207	-1.00845	1.00845	0.21	0.2613	1.98003	0.0572831	-0.040855	0.198785	0.33144	0.215043	26.8131	0.023	0.023	-0.153385	-0.0331805	0.333726	0.21	0.0541217	26.8186	0.177831	0.331897	3.21496	0	-0.0370071
2022	DP3	Chăm sóc sức khỏe	0.3633	0.5837	0.2207	-1.35836	1.35836	0.2287	0.2782	1.37185	0.0484379	-0.0331805	0.241068	0.198785	0.177831	26.8186	0.475	-0.475	-0.130368	0.23432	0.361397	0.2287	0.0604327	26.9535	0.178034	0.315801	3.43058	0	0.272882
2023	DP3	Chăm sóc sức khỏe	0.1453	0.695	0.2207	-1.05629	1.05629	0.2323	0.2828	2.36056	0.00526533	0.23432	0.29297	0.241068	0.178034	26.9535	0.069	0.069	-0.26727	-0.148336	0.297573	0.2323	0.0781739	27.07	0.179021	0.264845	3.79278	0	-0.155309
2024	DP3	Chăm sóc sức khỏe	0.3112	0.5839	0.2207	-0.81903	0.81903	0.2057	0.2454	2.20861	0.0387729	-0.148336	0.161081	0.29297	0.179021	27.07	0.186	0.186	-0.152781	0.0135897	0.245041	0.2057	0.0426137	27.1331	0.146264	0.230063	4.87453	0	0.0189261
2020	DTD	Bất động sản	0.3947	0.3449	0	-0.289518	0.289518	0.0601	0.2875	1.22036	0.0989745	0.319326	0.075589	0.075589	0.695646	28.3958	0.094	-0.094	-0.074889	0.319326	0.151078	0.0601	0.075589	28.3958	0.695646	0.119511	1.16604	0	2.68761
2021	DTD	Bất động sản	0.4203	0.3928	0	-0.111798	0.111798	0.0583	0.2287	0.804543	0.00177592	0.319326	-0.00363084	0.075589	0.695646	28.3958	0.097	0.097	0.00533084	-0.023893	0.109759	0.0583	-0.00101361	28.2957	0.595828	0.12131	1.09469	0	-0.068937
2022	DTD	Bất động sản	0.4366	0.409	0	-0.228277	0.228277	0.0533	0.1609	1.07115	0.0361063	-0.023893	0.124345	-0.00363084	0.595828	28.2957	0.012	0.012	-0.109845	-0.0572929	0.116911	0.0533	0.0295322	28.3419	0.531516	0.111634	1.33031	0	-0.160636
2023	DTD	Bất động sản	0.3785	0.4075	0	-0.390061	0.390061	0.1029	0.2554	1.04999	0.0587683	-0.0572929	0.182462	0.124345	0.531516	28.3419	0.023	-0.023	-0.203362	0.0997735	0.102478	0.1029	0.0466686	28.4127	0.435747	0.0954741	2.76729	0	0.349031
2024	DTD	Bất động sản	0.3705	0.4023	0	-0.120342	0.120342	0.0547	0.0943	1.10453	0.0435405	0.0997735	0.0523171	0.182462	0.435747	28.4127	0.039	-0.039	-0.104117	-0.132885	0.161766	0.0547	0.0135421	28.4257	0.403379	0.159668	3.45545	0	-0.36987
2020	DTG	Chăm sóc sức khỏe	0.2639	0.8299	0	-0.266655	0.266655	0.0179	0.0395	0.978369	0.0133039	-0.169409	0.0834286	0.0834286	0.53458	26.279	0.068	0.068	-0.0233286	-0.169409	0.382064	0.0179	0.0834286	26.279	0.53458	0.41125	1.18601	0	-0.161609
2021	DTG	Chăm sóc sức khỏe	0.3565	0.8299	0	-0.164817	0.164817	0.0037	0.0077	1.09206	0.00483286	-0.169409	0.0335707	0.0834286	0.53458	26.279	0.066	0.066	0.0423293	-0.160796	0.373745	0.0037	0.00808392	26.1827	0.49971	0.411544	1.14995	0	-0.169976
2022	DTG	Chăm sóc sức khỏe	0.526	0.7752	0	-0.20668	0.20668	0.0729	0.1435	1.17152	0.0297099	-0.160796	0.059215	0.0335707	0.49971	26.1827	0.044	0.044	-0.00811498	0.399911	0.392218	0.0729	0.0140912	26.2951	0.484462	0.350515	1.30563	1	0.462537
2023	DTG	Chăm sóc sức khỏe	0.2774	0.8992	0	-0.325972	0.325972	0.1076	0.2055	1.01669	0.0628146	0.399911	-0.0263707	0.059215	0.484462	26.2951	0.016	0.016	0.00417072	0.287054	0.336761	0.1076	-0.00696285	26.4488	0.469428	0.288793	1.3931	1	0.254016
2024	DTG	Chăm sóc sức khỏe	0.2763	0.8155	0	-0.363309	0.363309	0.0719	0.1327	0.990688	0.0258909	0.287054	0.0282338	-0.0263707	0.469428	26.4488	0.003	0.003	-0.0223338	-0.0275531	0.31811	0.0719	0.00759968	26.5428	0.44762	0.289543	1.52955	0	-0.0226725
2020	DTK	Dịch vụ tiện ích	0.0002	0.9927	0.9927	-0.139019	0.139019	0.0243	0.0693	1.11736	0.0094309	0.00840854	0.10416	0.10416	0.633118	30.6308	0.054	0.054	-0.0985603	0.00840854	0.663092	0.0243	0.10416	30.6308	0.633118	0.724222	0.579097	0	0.0146544
2021	DTK	Dịch vụ tiện ích	0.0002	0.9927	0.9927	-0.10947	0.10947	0.0468	0.1203	0.930906	0.0317699	0.00840854	0.0842197	0.10416	0.633118	30.6308	0.013	-0.013	-0.0240197	0.014468	0.640438	0.0468	0.0201272	30.5634	0.585389	0.685063	0.695167	0	0.0227531
2022	DTK	Dịch vụ tiện ích	0.0002	0.9927	0.9927	-0.115447	0.115447	0.0439	0.0981	0.942876	0.00915115	0.014468	0.0939849	0.0842197	0.585389	30.5634	0.062	-0.062	0.0458151	-0.121954	0.577556	0.0439	0.0227052	30.4447	0.512839	0.650375	0.7683	0	-0.175308
2023	DTK	Dịch vụ tiện ích	0.0002	0.9927	0.9927	-0.150794	0.150794	0.0326	0.0666	1.00252	0.00742683	-0.121954	0.114833	0.0939849	0.512839	30.4447	0.021	0.021	0.179067	0.0635921	0.568937	0.0326	0.0270059	30.4343	0.505907	0.57489	0.85975	0	0.0984346
2024	DTK	Dịch vụ tiện ích	0.0001	0.9927	0.9927	-0.140171	0.140171	0.0432	0.0829	1.05783	0.0151241	0.0635921	0.116042	0.114833	0.505907	30.4343	0.108	0.108	-0.0222424	0.0611745	0.504732	0.0432	0.0288596	30.3739	0.451158	0.536161	0.925286	0	0.085314
2020	EBS	Dịch vụ viễn thông	0.3213	0.7866	0.2535	-0.36677	0.36677	0.0522	0.064	0.809681	0.197776	-0.372579	0.199015	0.199015	0.122441	25.7835	0.11	0.110	-0.169315	-0.372579	0.00836848	0.0522	0.199015	25.7835	0.122441	0.00800184	6.87999	0	-0.329603
2021	EBS	Dịch vụ viễn thông	0.3213	0.7866	0.2535	-0.220873	0.220873	0.0592	0.0783	0.762225	-0.0304188	-0.372579	-0.00990152	0.199015	0.122441	25.7835	0.016	0.016	0.116702	0.0277592	0.130773	0.0592	-0.00253082	25.9812	0.251458	0.107316	2.93813	0	0.0383092
2022	EBS	Dịch vụ viễn thông	0.3213	0.5908	0.2535	-0.226052	0.226052	0.0624	0.0898	0.811657	0.00473766	0.0277592	0.0686073	-0.00990152	0.251458	25.9812	0.246	-0.246	0.0115927	-0.101013	0.205126	0.0624	0.0188416	26.0031	0.239113	0.200672	3.08174	0	-0.163606
2023	EBS	Dịch vụ viễn thông	0.3213	0.5908	0.2535	-0.16624	0.16624	0.0522	0.072	0.804463	0.00346704	-0.101013	0.0215413	0.0686073	0.239113	26.0031	0.007	0.007	0.0877587	-0.0993196	0.192013	0.0522	0.00544445	25.9268	0.169669	0.207238	4.3074	0	-0.196598
2024	EBS	Dịch vụ viễn thông	0.3215	0.5847	0.2535	-0.279222	0.279222	0.0641	0.0807	0.792357	0.025457	-0.0993196	0.0724393	0.0215413	0.169669	25.9268	0.016	-0.016	-0.0314393	0.107195	0.216583	0.0641	0.0174192	26.0031	0.239113	0.200672	3.08174	0	0.244708
2020	ECI	Dịch vụ viễn thông	0.0068	0.9045	0.2219	-0.606272	0.606272	0.1065	0.1383	2.0204	0.00158841	0.0593422	0.136847	0.136847	0.251068	24.5321	0.006	-0.006	-0.113647	0.0593422	0.000872116	0.1065	0.136847	24.5321	0.251068	0.000821835	3.88643	0	0.0401704
2021	ECI	Dịch vụ viễn thông	0.0068	0.9394	0.2219	-0.40783	0.40783	0.1038	0.1399	1.34275	0.00220427	0.0593422	0.0788931	0.136847	0.251068	24.5321	0.039	-0.039	-0.0573931	-0.115462	0.00170871	0.1038	0.0203087	24.5941	0.265115	0.00160598	3.67827	0	-0.0797384
2022	ECI	Dịch vụ viễn thông	0.0252	0.5244	0.2219	-0.345536	0.345536	0.0501	0.0764	1.07035	0.095409	-0.115462	0.148137	0.0788931	0.265115	24.5941	0.087	-0.087	-0.0640371	-0.123043	0.110849	0.0501	0.038182	24.787	0.287255	0.091402	3.91832	0	-0.0982426
2023	ECI	Dịch vụ viễn thông	0.0229	0.6943	0.2219	-0.0942209	0.0942209	-0.1071	-0.1701	1.21288	0	-0.123043	0.070546	0.148137	0.287255	24.787	0.012	-0.012	0.00315399	-0.61625	0.0743128	-0.1071	0.0193323	24.6616	0.325124	0.0842446	3.38379	0	-0.661739
2024	ECI	Dịch vụ viễn thông	0.0229	0.7753	0.2219	0.237607	0.237607	-0.0096	-0.0139	1.01786	0.0152438	-0.61625	-0.195647	0.070546	0.325124	24.6616	0.029	0.029	0.273747	-0.290137	0.065142	-0.0096	-0.045848	24.5919	0.286287	0.0698457	3.91159	0	-0.812461
2020	EID	Dịch vụ viễn thông	0.0035	0.5748	0.4016	-0.855942	0.855942	0.1051	0.1695	1.10987	-0.0204743	0.0305169	0.253204	0.253204	0.358074	26.8947	0.061	-0.061	-0.204904	0.0305169	0.000666774	0.1051	0.253204	26.8947	0.358074	0.000651775	2.35485	0	0.0218889
2021	EID	Dịch vụ viễn thông	0.0015	0.5748	0.4016	-0.784599	0.784599	0.1002	0.1551	0.942867	0.00396007	0.0305169	0.13304	0.253204	0.358074	26.8947	0.272	-0.272	0.11586	0.233796	0.00553416	0.1002	0.0336383	26.9486	0.343341	0.0052435	2.49235	0	0.16788
2022	EID	Dịch vụ viễn thông	0.0044	0.5897	0.4016	-0.737002	0.737002	0.142	0.2112	0.87281	-0.0112311	0.233796	0.0352854	0.13304	0.343341	26.9486	0.241	-0.241	-0.0242854	0.465754	0.0092083	0.142	0.00905924	27.0209	0.3068	0.00856628	2.81075	0	0.302238
2023	EID	Dịch vụ viễn thông	0.0044	0.5617	0.4016	-1.28662	1.28662	0.1213	0.1812	0.962888	0.000497846	0.465754	0.420848	0.0352854	0.3068	27.0209	0.163	0.163	-0.386948	0.0707838	0.00702186	0.1213	0.109012	27.1791	0.345373	0.00599416	2.57768	0	0.037916
2024	EID	Dịch vụ viễn thông	0.0044	0.6502	0.4016	-0.692263	0.692263	0.1152	0.1713	0.912466	-0.00316585	0.0707838	0.081493	0.420848	0.345373	27.1791	0.145	-0.145	-0.034493	0.124081	0.00930598	0.1152	0.0219818	27.2282	0.311043	0.00886056	2.89063	0	0.0750164
2020	GDW	Dịch vụ tiện ích	0	0.8126	0.5121	-1.3635	1.3635	0.0579	0.1155	1.11379	0.0723253	0.185493	0.265421	0.265421	0.510307	26.5615	0.072	0.072	-0.299021	0.185493	0.486791	0.0579	0.265421	26.5615	0.510307	0.426526	1.17316	0	0.107611
2021	GDW	Dịch vụ tiện ích	0	0.8648	0.5121	-0.696515	0.696515	0.0615	0.1105	1.3185	0.0649097	0.185493	-0.150078	0.265421	0.510307	26.5615	0.12	0.120	0.153678	-0.0471197	0.384399	0.0615	-0.0399951	26.3057	0.356774	0.496448	1.42047	0	-0.0281668
2022	GDW	Dịch vụ tiện ích	0	0.8648	0.5121	-1.72506	1.72506	0.0752	0.1202	1.32102	0.0786385	-0.0471197	0.274926	-0.150078	0.356774	26.3057	0.159	0.159	-0.272926	0.247903	0.517363	0.0752	0.0599884	26.4201	0.389947	0.461423	1.4188	0	0.118068
2023	GDW	Dịch vụ tiện ích	0	0.8648	0.5121	-1.53164	1.53164	0.119	0.2013	1.37566	0.134311	0.247903	0.182581	0.274926	0.389947	26.4201	0.018	0.018	-0.156281	0.0993233	0.5101	0.119	0.0482541	26.4482	0.426963	0.495978	1.18669	0	0.0474386
2024	GDW	Dịch vụ tiện ích	0.4842	0.8734	0.5121	-1.47677	1.47677	0.1328	0.2193	1.32535	0.0727869	0.0993233	0.127178	0.182581	0.426963	26.4482	0.003	0.003	-0.034878	0.0618161	0.51798	0.1328	0.0322408	26.4082	0.360458	0.539155	1.2274	0	0.0289899
2020	GMX	Nguyên vật liệu	0.097	0.0772	0	-1.06324	1.06324	0.1971	0.3003	1.0335	0.0370275	-0.048225	0.245466	0.245466	0.343779	25.6841	0.248	0.248	-0.193366	-0.048225	0.384689	0.1971	0.245466	25.6841	0.343779	0.355402	1.22994	0	-0.0234551
2021	GMX	Nguyên vật liệu	0.0594	0.068	0	-0.679373	0.679373	0.1564	0.2345	1.48028	0.349807	-0.048225	0.183592	0.245466	0.343779	25.6841	0.198	0.198	-0.0873925	-0.355484	0.400615	0.1564	0.0477144	25.7799	0.323311	0.364012	0.99446	0	-0.191638
2022	GMX	Nguyên vật liệu	0.0594	0.068	0	-0.973749	0.973749	0.2523	0.394	1.28252	0.0290244	-0.355484	0.284784	0.183592	0.323311	25.7799	0.102	0.102	-0.256184	0.46347	0.370473	0.2523	0.0746042	25.9616	0.389753	0.308927	1.01361	0	0.340165
2023	GMX	Nguyên vật liệu	0.0598	0.1688	0	-0.253072	0.253072	0.1327	0.2018	1.28596	0.0059908	0.46347	-0.0493274	0.284784	0.389753	25.9616	0.08	-0.080	-0.138973	-0.495983	0.208408	0.1327	-0.013449	25.8459	0.289111	0.233962	1.2306	0	-0.325745
2024	GMX	Nguyên vật liệu	0.0513	0.2408	0	-0.435362	0.435362	0.1009	0.14	1.28285	0.088795	-0.495983	0.124154	-0.0493274	0.289111	25.8459	0.015	0.015	-0.119354	-0.1702	0.178135	0.1009	0.0292456	25.8007	0.268808	0.186371	1.32898	0	-0.147677
2020	HAD	Tiêu dùng thiết yếu	0.0058	0.55	0.55	-0.702298	0.702298	0.085	0.1087	0.881491	0.0272258	-0.0823108	0.196677	0.196677	0.171187	25.255	0.109	0.109	-0.0343771	-0.0823108	0.286197	0.085	0.196677	25.255	0.171187	0.313654	3.78206	0	-0.0527926
2021	HAD	Tiêu dùng thiết yếu	0.0058	0.55	0.55	-0.289166	0.289166	0.0345	0.0423	0.933376	0.0158901	-0.0823108	0.00345559	0.196677	0.171187	25.255	0.072	0.072	-0.00225559	-0.256386	0.246154	0.0345	0.000824355	25.2213	0.198721	0.254593	3.50893	0	-0.158409
2022	HAD	Tiêu dùng thiết yếu	0.0003	0.55	0.55	-0.776277	0.776277	0.1143	0.142	0.801427	0.0269882	-0.256386	0.151382	0.00345559	0.198721	25.2213	0.037	-0.037	-0.150182	0.27854	0.215559	0.1143	0.0372076	25.2719	0.19192	0.20492	3.84065	0	0.197712
2023	HAD	Tiêu dùng thiết yếu	0.0003	0.55	0.55	-0.4735	0.4735	0.0639	0.0798	0.903894	0.0423905	0.27854	0.0231614	0.151382	0.19192	25.2719	0.008	0.008	-0.0287614	0.158354	0.188319	0.0639	0.00593688	25.2621	0.207151	0.190179	3.61834	0	0.0987203
2024	HAD	Tiêu dùng thiết yếu	0.0003	0.55	0.55	-0.60611	0.60611	0.0669	0.0852	0.895898	0.0477522	0.158354	0.0938425	0.0231614	0.207151	25.2621	0.01	-0.010	-0.0746425	0.0575436	0.159521	0.0669	0.0233453	25.2783	0.222989	0.156953	3.57144	0	0.0323309
2020	HAT	Tiêu dùng thiết yếu	0.0003	0.6	0.6	0.0785031	0.0785031	0.0564	0.1367	1.07218	0.0180517	-0.3796	-0.0458841	-0.0458841	0.605404	25.802	0.125	0.125	0.0592841	-0.3796	0.142451	0.0564	-0.0458841	25.802	0.605404	0.135175	0.944295	0	-0.0711024
2021	HAT	Tiêu dùng thiết yếu	0.0003	0.6	0.6	0.23503	0.23503	0.0074	0.0186	1.12501	0.00132408	-0.3796	-0.0645846	-0.0458841	0.605404	25.802	0.129	0.129	0.199085	-1.91162	0.114257	0.0074	-0.0165693	25.5732	0.596879	0.14364	1.03985	0	-0.406219
2022	HAT	Tiêu dùng thiết yếu	0.0003	0.6529	0.6	-1.07873	1.07873	0.1218	0.3124	1.3126	0.010716	-1.91162	0.342699	-0.0645846	0.596879	25.5732	0.176	0.176	-0.333999	4.94062	0.127543	0.1218	0.0759136	25.8845	0.619531	0.0934194	1.28542	0	1.40644
2023	HAT	Tiêu dùng thiết yếu	0.0003	0.6623	0.6	-0.529728	0.529728	0.1339	0.367	1.3244	0.00956134	4.94062	0.200421	0.342699	0.619531	25.8845	0.06	-0.060	-0.188721	0.885038	0.0843568	0.1339	0.057843	26.0041	0.649026	0.0748531	1.27458	0	0.142938
2024	HAT	Tiêu dùng thiết yếu	0.0003	0.6623	0.6	-0.38972	0.38972	0.0911	0.2569	1.24963	0.00951291	0.885038	0.0443777	0.200421	0.649026	26.0041	0.278	-0.278	-0.0231777	0.586194	0.071679	0.0911	0.0117567	26.0957	0.642118	0.0654	1.19777	0	0.0933499
2020	HCT	Công nghiệp	0.0012	0.8867	0.5386	-0.0526121	0.0526121	0.0166	0.0183	0.638041	0	-0.205562	0.118975	0.118975	0.0936071	24.534	0.044	0.044	-0.0474747	-0.205562	0.338923	0.0166	0.118975	24.534	0.0936071	0.348031	6.76016	0	-0.0935222
2021	HCT	Công nghiệp	0.0025	0.8378	0.5386	0.124261	0.124261	0.0156	0.017	0.849828	0.0112219	-0.205562	0.0330686	0.118975	0.0936071	24.534	0.048	-0.048	0.223431	-0.435041	0.285624	0.0156	0.00815753	24.5084	0.0714884	0.293042	9.12363	0	-0.212631
2022	HCT	Công nghiệp	0.0028	0.8378	0.5386	0.130907	0.130907	0.0143	0.0155	0.522123	0	-0.435041	-0.0321726	0.0330686	0.0714884	24.5084	0.209	-0.209	0.0541726	-0.0492281	0.275155	0.0143	-0.00794004	24.519	0.082691	0.272256	8.01754	0	-0.0297849
2023	HCT	Công nghiệp	0.0015	0.8378	0.5386	0.0380236	0.0380236	-0.0399	-0.0442	0.731783	0.0177846	-0.0492281	0.15331	-0.0321726	0.082691	24.519	0.029	-0.029	-0.11401	-0.315099	0.238365	-0.0399	0.0385306	24.4923	0.112973	0.244809	6.29363	0	-0.198592
2024	HCT	Công nghiệp	0.2534	0.8791	0.5386	0.0763057	0.0763057	0.0051	0.0056	0.717422	0.00817442	-0.315099	0.0962199	0.15331	0.112973	24.4923	0.008	-0.008	-0.0696199	-0.587951	0.203353	0.0051	0.0237341	24.4585	0.0773457	0.210342	9.84619	0	-0.450213
2020	HDA	Nguyên vật liệu	0.205	0.261	0	-0.55675	0.55675	0.0284	0.0564	1.27266	0.125207	-0.0876093	0.111728	0.111728	0.455934	26.649	0.122	-0.122	-0.0730283	-0.0876093	0.260508	0.0284	0.111728	26.649	0.455934	0.245542	1.23826	0	-0.10577
2021	HDA	Nguyên vật liệu	0.205	0.261	0	-0.559113	0.559113	0.0681	0.1312	0.588416	0.038352	-0.0876093	0.150978	0.111728	0.455934	26.649	0.277	-0.277	-0.0869783	0.018538	0.217233	0.0681	0.0388608	26.6894	0.426241	0.208618	1.42273	0	0.0265535
2022	HDA	Nguyên vật liệu	0.2001	0.225	0	-0.123438	0.123438	0.0026	0.0044	0.608745	0.0967666	0.018538	-0.159928	0.150978	0.426241	26.6894	0.118	-0.118	0.227328	-0.0639303	0.165725	0.0026	-0.0407907	26.9106	0.330774	0.132849	1.8352	0	-0.0928878
2023	HDA	Nguyên vật liệu	0.1308	0.225	0	-0.249757	0.249757	-0.0282	-0.0441	0.504379	-0.0342886	-0.0639303	0.0236849	-0.159928	0.330774	26.9106	0.074	-0.074	0.0557151	-0.0586777	0.264117	-0.0282	0.00657321	26.8577	0.289071	0.278452	2.14762	0	-0.117244
2024	HDA	Nguyên vật liệu	0.1308	0.225	0	-0.33266	0.33266	0.0302	0.0433	0.524551	0.0619315	-0.0586777	0.0118774	0.0236849	0.289071	26.8577	0.132	0.132	0.0443226	0.129087	0.249017	0.0302	0.0028909	26.9395	0.315138	0.22945	2.127	0	0.277145
2020	HGM	Nguyên vật liệu	0.0761	0.55	0.47	-0.0317006	0.0317006	0.0655	0.0773	2.98708	-0.000193361	-0.0867879	-0.0286791	-0.0286791	0.155584	25.9075	0.097	0.097	0.113679	-0.0867879	0.112825	0.0655	-0.0286791	25.9075	0.155584	0.112783	6.79205	0	-0.173487
2021	HGM	Nguyên vật liệu	0.0726	0.55	0.47	-0.874789	0.874789	0.5298	0.6237	2.17228	0.0188456	-0.0867879	0.377228	-0.0286791	0.155584	25.9075	0.03	0.030	-0.480628	0.450383	0.100005	0.5298	0.0943244	26.1484	0.146637	0.0785989	6.37434	0	1.08969
2022	HGM	Nguyên vật liệu	0.0726	0.55	0.47	-0.784712	0.784712	0.2438	0.2871	2.49402	0.0379148	0.450383	0.292506	0.377228	0.146637	26.1484	0.083	0.083	-0.117806	0.206392	0.0760127	0.2438	0.0818907	26.0963	0.155364	0.0800797	7.00351	0	0.304042
2023	HGM	Nguyên vật liệu	0.072	0.55	0.47	-0.631727	0.631727	0.2415	0.289	11.8845	0.0171039	0.206392	0.2815	0.292506	0.155364	26.0963	0.042	0.042	-0.4566	-0.117386	0.067278	0.2415	0.0685414	26.1991	0.172963	0.0607055	5.95393	0	-0.125872
2024	HGM	Nguyên vật liệu	0.0623	0.5459	0.4664	-1.88722	1.88722	0.5519	0.6775	7.03708	0.0177264	-0.117386	0.828551	0.2815	0.172963	26.1991	0.006	-0.006	-0.923551	0.815466	0.0745623	0.5519	0.217775	26.775	0.192298	0.0419162	4.99264	0	1.10864
2020	HHC	Tiêu dùng thiết yếu	0.0584	0.48	0	-0.156315	0.156315	0.0334	0.0868	1.82065	0.00216545	0.313278	-0.0843398	-0.0843398	0.60576	27.8036	0.027	-0.027	0.15734	0.313278	0.174673	0.0334	-0.0843398	27.8036	0.60576	0.169001	1.65145	0	0.343503
2021	HHC	Tiêu dùng thiết yếu	0.0497	0.48	0	-0.101542	0.101542	0.043	0.1077	1.98131	0.00608335	0.313278	0.00362769	-0.0843398	0.60576	27.8036	0.107	0.107	0.0729723	-0.402411	0.15517	0.043	0.00092189	27.8506	0.596669	0.148049	1.27041	0	-0.339445
2022	HHC	Tiêu dùng thiết yếu	0.0497	0.48	0	-0.327724	0.327724	0.0424	0.1001	1.69742	0.00722577	-0.402411	0.102096	0.00362769	0.596669	27.8506	0.023	-0.023	-0.0253961	0.420663	0.134159	0.0424	0.0261234	27.8501	0.556159	0.134227	1.49802	0	0.563023
2023	HHC	Tiêu dùng thiết yếu	0	0.48	0	-0.0651701	0.0651701	0.0331	0.0861	1.97082	0.00229728	0.420663	-0.0868224	0.102096	0.556159	27.8501	0.02	0.020	0.145222	-0.472522	0.123191	0.0331	-0.0217	28.1913	0.657663	0.0875785	1.23142	0	-0.404413
2024	HHC	Tiêu dùng thiết yếu	0	0.6626	0	-0.111128	0.111128	0.0329	0.0713	2.59586	0.00883878	-0.472522	-0.0371282	-0.0868224	0.657663	28.1913	0.355	0.355	-0.0633718	-0.0537183	0.0787905	0.0329	-0.0108504	27.5716	0.319521	0.146413	2.33544	0	-0.108583
2020	HLC	Năng lượng	0.001	0.7421	0.7421	-0.0685831	0.0685831	0.0125	0.1398	1.00131	0.0507142	-0.133405	0.0480429	0.0480429	0.910797	28.8946	0.013	-0.013	0.00445713	-0.133405	0.716534	0.0125	0.0480429	28.8946	0.910797	0.657926	0.860819	0	-0.137365
2021	HLC	Năng lượng	0.001	0.7421	0.7421	-0.28221	0.28221	0.021	0.2115	0.957461	0.0440444	-0.133405	0.212368	0.0480429	0.910797	28.8946	0.047	-0.047	-0.110368	0.14341	0.542181	0.021	0.0553559	28.7614	0.889343	0.619439	0.665773	0	0.186431
2022	HLC	Năng lượng	0.0003	0.7421	0.7421	-0.426759	0.426759	0.0264	0.2199	0.979038	0.0308834	0.14341	0.243681	0.212368	0.889343	28.7614	0.021	0.021	-0.199581	0.168675	0.496505	0.0264	0.0568685	28.6819	0.869745	0.53756	0.645272	0	0.161768
2023	HLC	Năng lượng	0.0004	0.7421	0.7421	-0.203685	0.203685	0.0388	0.2497	0.951453	0.0367779	0.168675	0.167599	0.243681	0.869745	28.6819	0.022	0.022	-0.070399	-0.215815	0.374424	0.0388	0.0402362	28.4408	0.812363	0.476505	0.632094	0	-0.16455
2024	HLC	Năng lượng	0.0003	0.7421	0.7421	-0.218927	0.218927	0.0454	0.2069	0.929653	0.0583527	-0.215815	0.181966	0.167599	0.812363	28.4408	0.031	-0.031	-0.0967656	-0.0600685	0.35367	0.0454	0.040034	28.1128	0.736564	0.490974	0.598583	0	-0.0430764
2020	HLD	Bất động sản	0.0124	0.5725	0.51	-0.182795	0.182795	0.1107	0.1661	1.54776	0.000199821	-0.326487	0.191426	0.191426	0.287318	27.1408	0.054	0.054	-0.163226	-0.326487	0.061914	0.1107	0.191426	27.1408	0.287318	0.0737224	3.17843	0	-0.566738
2021	HLD	Bất động sản	0.0124	0.51	0.51	-0.0628609	0.0628609	0.0257	0.0345	1.19153	-0.00408174	-0.326487	0.0106993	0.191426	0.287318	27.1408	0.066	0.066	0.0132007	-0.165071	0.0633153	0.0257	0.00244196	27.0762	0.223195	0.0675391	4.34193	0	-0.555427
2022	HLD	Bất động sản	0.0124	0.51	0.51	0.336008	0.336008	0.0083	0.0112	1.14038	0	-0.165071	-0.223064	0.0106993	0.223195	27.0762	0.007	-0.007	0.261864	-0.0792002	0.0610457	0.0083	-0.0539659	27.1335	0.304905	0.0576465	4.8124	0	-0.561944
2023	HLD	Bất động sản	0.0124	0.5615	0	0.216902	0.216902	0.0055	0.0078	0.853446	-0.000414448	-0.0792002	-0.10192	-0.223064	0.304905	27.1335	0.062	0.062	0.10362	-0.036039	0.0516802	0.0055	-0.0262098	27.1077	0.28302	0.0530321	7.24547	0	-0.618148
2024	HLD	Bất động sản	0.0078	0.6105	0.5099	3.44927	3.44927	0.0029	0.009	1.04809	-0.000687514	-0.036039	-0.978056	-0.10192	0.28302	27.1077	0.115	0.115	0.993156	0.0260271	0.0478845	0.0029	-0.241357	28.3358	0.788833	0.0140233	1.82301	0	1.1393
2020	HOM	Nguyên vật liệu	0.0001	0.7107	0.7107	-0.174541	0.174541	0.0007	0.0012	0.751033	0.00579911	0.023698	0.0263298	0.0263298	0.352968	28.0129	0.058	0.058	0.0253702	0.023698	0.394076	0.0007	0.0263298	28.0129	0.352968	0.411547	1.20625	1	0.0219391
2021	HOM	Nguyên vật liệu	0.0004	0.7107	0.7107	-0.429269	0.429269	0.0017	0.0025	0.594846	0.0311968	0.023698	0.147794	0.0263298	0.352968	28.0129	0.005	-0.005	-0.0879935	0.102337	0.3664	0.0017	0.0361471	27.9849	0.332412	0.37683	1.38999	1	0.0887717
2022	HOM	Nguyên vật liệu	0.0003	0.7107	0.7107	-0.345666	0.345666	0.0145	0.0221	0.587038	0.0341262	0.102337	0.0152164	0.147794	0.332412	27.9849	0.26	0.260	0.0377836	0.159823	0.351525	0.0145	0.00375071	28.0507	0.360992	0.329112	1.3511	1	0.123809
2023	HOM	Nguyên vật liệu	0.0002	0.7107	0.7107	-0.280807	0.280807	-0.0209	-0.0328	0.546557	0.00587811	0.159823	0.0266298	0.0152164	0.360992	28.0507	0.072	0.072	-0.00552976	-0.21584	0.307664	-0.0209	0.00687666	28.0062	0.361602	0.321664	1.31013	1	-0.158915
2024	HOM	Nguyên vật liệu	0.0003	0.7107	0.7107	-0.425867	0.425867	-0.0518	-0.0781	0.521729	0.0230788	-0.21584	0.099191	0.0266298	0.361602	28.0062	0.061	0.061	-0.076491	-0.0194818	0.32765	-0.0518	0.0242461	27.8457	0.306812	0.384697	1.35684	1	-0.0163116
2020	HTC	Tiêu dùng không thiết yếu	0.1349	0.5203	0.3341	-0.0354676	0.0354676	0.0832	0.1525	1.18254	0.013125	-0.59213	-0.00494637	-0.00494637	0.459477	26.9776	0.056	0.056	0.0516464	-0.59213	0.0900985	0.0832	-0.00494637	26.9776	0.459477	0.0825424	1.54281	0	-0.150521
2021	HTC	Tiêu dùng không thiết yếu	0.1375	0.3419	0.1532	-0.107527	0.107527	0.0623	0.1223	0.791861	0.020758	-0.59213	0.160267	-0.00494637	0.459477	26.9776	0.014	-0.014	-0.115567	-0.438346	0.0824064	0.0623	0.0418203	27.1095	0.517597	0.0722303	0.947021	0	-0.14318
2022	HTC	Tiêu dùng không thiết yếu	0.1391	0.5567	0.3341	-0.144543	0.144543	0.0601	0.1258	1.06001	0.0293388	-0.438346	0.103224	0.160267	0.517597	27.1095	0.042	-0.042	-0.0961242	0.117163	0.112313	0.0601	0.0275042	27.1518	0.527131	0.107654	1.08194	0	0.0509576
2023	HTC	Tiêu dùng không thiết yếu	0.1365	0.5567	0.3341	-0.0832828	0.0832828	0.0759	0.1534	1.2614	0.0324068	0.117163	0.0183394	0.103224	0.527131	27.1518	0.141	0.141	-0.0083394	-0.633243	0.126772	0.0759	0.00468196	27.1149	0.481771	0.131542	1.50726	0	-0.273403
2024	HTC	Tiêu dùng không thiết yếu	0.1649	0.6061	0.2386	-0.211701	0.211701	0.0511	0.1001	1.35191	0.0184221	-0.633243	0.0101541	0.0183394	0.481771	27.1149	0.021	0.021	0.00794587	-0.0459672	0.12669	0.0511	0.00249166	27.1232	0.496499	0.125638	1.4229	0	-0.0263237
2020	HUT	Tiêu dùng không thiết yếu	0.1178	0.1724	0	-0.0158451	0.0158451	-0.0222	-0.0759	1.21626	-0.0051025	-0.032374	0.0129615	0.0129615	0.708536	29.9493	0.064	0.064	0.0832385	-0.032374	0.566212	-0.0222	0.0129615	29.9493	0.708536	0.61412	1.22427	0	-0.322155
2021	HUT	Tiêu dùng không thiết yếu	0.0124	0.1724	0	-0.0194464	0.0194464	0.0059	0.0181	1.13121	-0.00753388	-0.032374	-0.0211232	0.0129615	0.708536	29.9493	0.003	0.003	0.0295232	0.0118	0.595024	0.0059	-0.00506645	30.0036	0.653384	0.563566	1.74084	0	0.159715
2022	HUT	Tiêu dùng không thiết yếu	0.0059	0.0709	0	-0.0956654	0.0956654	0.0129	0.0374	1.25744	-0.00648381	0.0118	0.0447399	-0.0211232	0.653384	30.0036	0.037	0.037	-0.0378399	0.0189051	0.542547	0.0129	0.0114886	30.0848	0.66701	0.500249	1.42164	0	0.232959
2023	HUT	Tiêu dùng không thiết yếu	0.0023	0.1724	0	-0.0936525	0.0936525	0.0025	0.0076	1.10424	-0.0148508	0.0189051	0.136869	0.0447399	0.66701	30.0848	0.052	0.052	-0.125069	0.851812	0.617067	0.0025	0.0356051	30.9175	0.577057	0.268345	1.25563	0	9.23308
2024	HUT	Tiêu dùng không thiết yếu	0.0023	0.125	0	-0.209752	0.209752	0.0056	0.0137	1.088	0.00378127	0.851812	0.07711	0.136869	0.577057	30.9175	0.138	0.138	-0.00841003	0.719546	0.265264	0.0056	0.02687	30.9979	0.60152	0.244782	1.3863	0	1.75265
2020	HVT	Nguyên vật liệu	0.038	0.7545	0.685	-0.472117	0.472117	0.0602	0.1341	1.79722	0.142928	-0.511713	0.288561	0.288561	0.514202	26.8598	0.025	-0.025	-0.227861	-0.511713	0.464308	0.0602	0.288561	26.8598	0.514202	0.521284	1.16528	0	-0.272487
2021	HVT	Nguyên vật liệu	0.0336	0.685	0.685	-0.597997	0.597997	0.1398	0.269	1.50208	0.0578403	-0.511713	0.189154	0.288561	0.514202	26.8598	0.089	-0.089	-0.118654	0.236575	0.45221	0.1398	0.0445549	26.9695	0.450227	0.405256	1.45339	0	0.154234
2022	HVT	Nguyên vật liệu	0.0355	0.685	0.685	-0.885765	0.885765	0.2939	0.4911	1.30667	0.115074	0.236575	0.191964	0.189154	0.450227	26.9695	0.13	0.130	-0.118964	1.08017	0.42868	0.2939	0.0506189	27.2576	0.364934	0.321352	1.83488	0	0.680799
2023	HVT	Nguyên vật liệu	0.0355	0.7391	0.6849	-0.59351	0.59351	0.0938	0.1618	2.04392	0.360793	1.08017	0.260805	0.191964	0.364934	27.2576	0.101	-0.101	-0.183105	-0.170612	0.455234	0.0938	0.0745314	27.3495	0.471369	0.415278	1.27972	0	-0.0853442
2024	HVT	Nguyên vật liệu	0.0355	0.6849	0.6849	-0.534776	0.534776	0.106	0.1982	1.94164	0.123049	-0.170612	0.093184	0.260805	0.471369	27.3495	0.156	0.156	-0.043784	0.254675	0.584065	0.106	0.0243653	27.4623	0.460051	0.521776	1.10153	0	0.152682
2020	IDC	Bất động sản	0	0.5313	0	-0.120023	0.120023	0.0605	0.2289	1.95751	0.0569947	0.0298484	0.0362634	0.0362634	0.658764	30.3072	0.021	-0.021	-0.0242634	0.0298484	0.422281	0.0605	0.0362634	30.3072	0.658764	0.416068	1.75506	0	0.0866951
2021	IDC	Bất động sản	0.0001	0.3443	0	-0.0852295	0.0852295	0.0297	0.1125	1.38144	0.00813363	0.0298484	0.0532883	0.0362634	0.658764	30.3072	0.169	0.169	-0.0350883	-0.0725982	0.400608	0.0297	0.0134208	30.4083	0.68723	0.362071	1.64722	0	-0.196938
2022	IDC	Bất động sản	0.0019	0.3443	0	-0.280606	0.280606	0.1068	0.3996	1.68141	0.0909369	-0.0725982	0.128478	0.0532883	0.68723	30.4083	0.136	0.136	-0.111978	0.198071	0.533779	0.1068	0.0337424	30.465	0.639818	0.504364	1.79503	0	0.740288
2023	IDC	Bất động sản	0.0019	0.3443	0	-0.269974	0.269974	0.0802	0.281	1.69643	0.0565137	0.198071	0.160747	0.128478	0.639818	30.465	0.019	-0.019	-0.144847	-0.0145978	0.189312	0.0802	0.0413254	30.5057	0.649844	0.181759	1.50958	0	-0.033179
2024	IDC	Bất động sản	0.0019	0.3443	0	-0.396682	0.396682	0.1093	0.2976	1.59432	0.0497915	-0.0145978	0.230537	0.160747	0.649844	30.5057	0.15	0.150	-0.214637	0.0908204	0.173212	0.1093	0.0588075	30.5649	0.616618	0.163265	1.63721	1	0.222381
2020	IDJ	Bất động sản	0.0048	0.1115	0	0.440892	0.440892	0.041	0.209	1.29655	0.0165846	0.0234124	-0.0270701	-0.0270701	0.835832	28.5293	0.042	-0.042	0.0408701	0.0234124	0.0229958	0.041	-0.0270701	28.5293	0.835832	0.0130154	1.29734	0	0.0860322
2021	IDJ	Bất động sản	0.0013	0.2238	0	0.055566	0.055566	0.0686	0.2993	0.88636	-0.00762504	0.0234124	-0.0884057	-0.0270701	0.835832	28.5293	0.267	-0.267	0.123106	0.196585	0.0141476	0.0686	-0.0282268	28.871	0.714045	0.0100523	1.05358	0	1.17521
2022	IDJ	Bất động sản	0.0361	0.1866	0	-0.000531243	0.000531243	0.036	0.1031	0.808981	-0.0178074	0.196585	-0.0324421	-0.0884057	0.714045	28.871	0.158	-0.158	0.0467421	-0.0221463	0.0100839	0.036	-0.00948304	29.1848	0.588873	0.00736831	1.2704	0	-0.0856604
2023	IDJ	Bất động sản	0.0356	0.1866	0	-0.114533	0.114533	0.0232	0.0557	0.787485	0.00247398	-0.0221463	0.023913	-0.0324421	0.588873	29.1848	0.038	0.038	0.055387	0.00955128	0.00708218	0.0232	0.00690848	29.1752	0.56155	0.00715048	1.27147	0	0.0552963
2024	IDJ	Bất động sản	0.0032	0.2491	0	-0.111117	0.111117	0.0215	0.0461	0.744998	-0.00120845	0.00955128	-0.0146103	0.023913	0.56155	29.1752	0.132	-0.132	0.0922103	-0.0308518	0.00699804	0.0215	-0.00363505	29.0686	0.50189	0.0077852	1.4129	0	-0.167638
2020	INN	Nguyên vật liệu	0.2744	0.2636	0	-0.383989	0.383989	0.0841	0.1324	1.22391	0.147055	-0.125523	0.199981	0.199981	0.353684	27.4111	0.084	-0.084	-0.228481	-0.125523	0.325467	0.0841	0.199981	27.4111	0.353684	0.321356	1.57203	0	-0.0759561
2021	INN	Nguyên vật liệu	0.2774	0.2636	0	-0.0259764	0.0259764	0.0737	0.1327	1.11775	0.0891142	-0.125523	-0.0743257	0.199981	0.353684	27.4111	0.045	-0.045	0.137226	0.406654	0.388821	0.0737	-0.0186995	27.7465	0.509978	0.278005	1.43833	0	0.269706
2022	INN	Nguyên vật liệu	0.2774	0.2636	0	-0.556131	0.556131	0.0781	0.1446	1.26122	0.0476599	0.406654	0.243634	-0.0743257	0.509978	27.7465	0.061	-0.061	-0.139634	0.154819	0.330798	0.0781	0.0710306	27.6237	0.403605	0.374019	1.49739	0	0.113106
2023	INN	Nguyên vật liệu	0.25	0.2636	0	-0.603365	0.603365	0.0953	0.1589	1.29736	0.0439931	0.154819	0.299791	0.243634	0.403605	27.6237	0.001	0.001	-0.227391	-0.179348	0.294026	0.0953	0.0703518	27.7169	0.397119	0.267865	1.78351	0	-0.104109
2024	INN	Nguyên vật liệu	0.2332	0.314	0	-0.184432	0.184432	0.0993	0.1655	1.21347	0.0737962	-0.179348	-0.0493965	0.299791	0.397119	27.7169	0.035	0.035	0.133296	0.215597	0.225761	0.0993	-0.0129241	27.819	0.402572	0.203854	1.64215	0	0.153337
2020	IPA	Công nghiệp	0.0103	0.5376	0	-0.0331222	0.0331222	0.0483	0.121	1.54676	0.0824786	0.00668357	-0.0213176	-0.0213176	0.531899	29.0484	0.111	-0.111	0.152218	0.00668357	0.303398	0.0483	-0.0213176	29.0484	0.531899	0.212382	2.07056	0	0.0843744
2021	IPA	Công nghiệp	0.0101	0.566	0	-0.037664	0.037664	0.2489	0.6452	0.829178	0.0319267	0.00668357	-0.000506555	-0.0213176	0.531899	29.0484	0.045	-0.045	-0.0905934	0.00455663	0.182431	0.2489	-0.000148986	29.7595	0.555584	0.089593	4.02599	0	0.0757811
2022	IPA	Công nghiệp	0.0101	0.607	0	0.124195	0.124195	0.011	0.028	0.940785	0.165636	0.00455663	-0.146612	-0.000506555	0.555584	29.7595	0.148	-0.148	0.301212	0.00329227	0.0868903	0.011	-0.0491623	29.8028	0.565474	0.083204	3.95369	0	0.103637
2023	IPA	Công nghiệp	0.0101	0.607	0	-0.0662977	0.0662977	0.0339	0.0835	0.828437	0.10252	0.00329227	0.0476762	-0.146612	0.565474	29.8028	0.041	-0.041	-0.0198762	0.00599702	0.0783427	0.0339	0.0121774	29.8099	0.540455	0.077794	0.780834	0	0.17863
2024	IPA	Công nghiệp	0.0101	0.607	0	-0.0782109	0.0782109	0.047	0.0961	0.774657	0.0570452	0.00599702	0.04289	0.0476762	0.540455	29.8099	0.12	0.120	0.00920997	0.0240901	0.0704245	0.047	0.0107602	29.791	0.481195	0.0717646	4.17084	0	0.613101
2020	ITQ	Nguyên vật liệu	0.1557	0.1169	0	-0.0382932	0.0382932	0.0048	0.0074	0.781293	0.0181886	-0.0134018	0.0439197	0.0439197	0.330268	26.6651	0.18	0.180	-0.0260197	-0.0134018	0.144201	0.0048	0.0439197	26.6651	0.330268	0.153726	2.5132	0	-0.0118622
2021	ITQ	Nguyên vật liệu	0.1489	0.126	0	-0.0992999	0.0992999	0.0284	0.0479	0.587824	0.10875	-0.0134018	0.12512	0.0439197	0.330268	26.6651	0.114	-0.114	-0.12442	0.612052	0.255205	0.0284	0.03028	26.9491	0.46522	0.192112	1.6968	0	0.514271
2022	ITQ	Nguyên vật liệu	0.0937	0.0875	0	0.360226	0.360226	-0.0336	-0.0591	0.562297	0.0637374	0.612052	-0.217799	0.12512	0.46522	26.9491	0.131	0.131	0.427499	-0.0390745	0.13101	-0.0336	-0.0621299	27.0337	0.400271	0.120378	1.91229	0	-0.0288024
2023	ITQ	Nguyên vật liệu	0.0933	0.0875	0	-0.0649979	0.0649979	0.0036	0.0058	0.524389	0.00988938	-0.0390745	0.0618769	-0.217799	0.400271	27.0337	0.128	-0.128	0.100023	-0.221354	0.101353	0.0036	0.0161234	26.9706	0.357969	0.107957	2.13878	0	-0.18284
2024	ITQ	Nguyên vật liệu	0.0933	0.0875	0	0.041493	0.041493	0.002	0.0032	0.539188	0.0308016	-0.221354	0.0055203	0.0618769	0.357969	26.9706	0.099	0.099	0.11498	0.0212933	0.0921403	0.002	0.00133653	27.0185	0.386423	0.0878327	1.90375	0	0.0202071
2020	KHS	Tiêu dùng thiết yếu	0.353	0.6287	0	-0.264545	0.264545	0.0263	0.11	1.23822	-0.00115686	0.0696997	0.1525	0.1525	0.697713	27.2322	0.033	-0.033	-0.1143	0.0696997	0.398491	0.0263	0.1525	27.2322	0.697713	0.462186	1.03317	0	0.0480277
2021	KHS	Tiêu dùng thiết yếu	0.353	0.6287	0	-0.543496	0.543496	0.0923	0.2983	0.868993	0.0334748	0.0696997	0.287011	0.1525	0.697713	27.2322	0.166	-0.166	-0.230511	-0.248591	0.450904	0.0923	0.0664427	27.0619	0.574209	0.534602	1.25577	0	-0.140921
2022	KHS	Tiêu dùng thiết yếu	0.4546	0.6287	0	0.0974985	0.0974985	0.0661	0.1797	0.77502	0.00515838	-0.248591	-0.0571243	0.287011	0.574209	27.0619	0.055	-0.055	0.148824	-0.11703	0.482343	0.0661	-0.0130682	27.0955	0.589121	0.466411	1.18491	0	-0.0651339
2023	KHS	Tiêu dùng thiết yếu	0.4546	0.7014	0	-0.170765	0.170765	0.002	0.0054	0.920032	0.0220958	-0.11703	0.13559	-0.0571243	0.589121	27.0955	0.109	0.109	-0.0432898	-0.42102	0.440637	0.002	0.0344667	26.9199	0.575361	0.525195	0.950642	0	-0.259209
2024	KHS	Tiêu dùng thiết yếu	0.4546	0.5219	0	-0.131521	0.131521	0.0521	0.1186	0.876264	0.0682779	-0.42102	0.105583	0.13559	0.575361	26.9199	0.031	-0.031	0.0344173	-0.0952845	0.468745	0.0521	0.0240848	26.9256	0.545787	0.466088	0.958329	0	-0.0664408
2020	KKC	Nguyên vật liệu	0.2538	0.2539	0	-0.233351	0.233351	0.0962	0.1807	1.43024	0	-0.668717	0.280109	0.280109	0.404781	25.5696	0.038	0.038	-0.235109	-0.668717	0.0579178	0.0962	0.280109	25.5696	0.404781	0.0608637	2.23981	0	-0.164461
2021	KKC	Nguyên vật liệu	0.0499	0.5077	0	1.26366	1.26366	0.0286	0.0769	0.874091	-0.00570963	-0.668717	-1.0203	0.280109	0.404781	25.5696	0.22	0.220	1.0041	-0.823141	0.0450901	0.0286	-0.248748	26.3371	0.731858	0.0209302	1.31315	0	-0.230559
2022	KKC	Nguyên vật liệu	0	0.8568	0	-0.43998	0.43998	-0.1883	-0.563	0.930042	-0.0242749	-0.823141	0.46477	-1.0203	0.731858	26.3371	0.033	0.033	-0.45787	-0.449692	0.0214724	-0.1883	0.158713	24.9565	0.402065	0.0854004	2.25525	0	-0.352659
2023	KKC	Nguyên vật liệu	0	0.8568	0	-0.262849	0.262849	0.0048	0.008	0.866692	0	-0.449692	0.508462	0.46477	0.402065	24.9565	0.034	0.034	-0.503762	-1.78615	0.055908	0.0048	0.0510789	24.9698	0.405221	0.0551708	1.744	0	-0.54406
2024	KKC	Nguyên vật liệu	0	0.8568	0	-0.508377	0.508377	0.093	0.1554	0.796426	-0.0097686	-1.78615	0.43733	0.508462	0.405221	24.9698	0.013	0.013	-0.43223	-0.209111	0.0444562	0.093	0.110058	25.0841	0.398101	0.0396534	2.43747	0	-0.141567
2020	KSD	Tiêu dùng không thiết yếu	0.3979	0.5341	0	0.0666191	0.0666191	-0.0653	-0.0669	0.86681	0.00288075	-0.836801	0.0133189	0.0133189	0.0241855	25.3673	0.145	-0.145	-0.0112189	-0.836801	0.453871	-0.0653	0.0133189	25.3673	0.0241855	0.485383	16.3092	0	-0.884386
2021	KSD	Tiêu dùng không thiết yếu	0.5822	0.5822	0	0.0346578	0.0346578	0.1623	0.1727	0.60528	0.0530869	-0.836801	-0.0644088	0.0133189	0.0241855	25.3673	0.123	-0.123	0.0664088	0.545055	0.514392	0.1623	-0.015562	25.6083	0.0882625	0.404216	4.5971	0	4.65907
2022	KSD	Tiêu dùng không thiết yếu	0.624	0.6239	0	-0.062611	0.062611	0.0012	0.0012	0.432616	0.0679248	0.545055	0.0836744	-0.0644088	0.0882625	25.6083	0.072	-0.072	-0.0645744	0.257969	0.404859	0.0012	0.0234275	25.6098	0.0884525	0.404254	5.12708	0	0.495863
2023	KSD	Tiêu dùng không thiết yếu	0.6108	0.9108	0	0.0295463	0.0295463	0.0012	0.0012	0.511052	-0.075579	0.257969	0.0689705	0.0836744	0.0884525	25.6098	0.072	0.072	-0.0453705	-0.381881	0.312645	0.0012	0.0172555	25.6059	0.0837047	0.313872	7.35441	0	-0.49145
2024	KSD	Tiêu dùng không thiết yếu	0.6108	0.7432	0	-0.0225126	0.0225126	-0.0056	-0.0059	0.479227	0.0159191	-0.381881	0.0408113	0.0689705	0.0837047	25.6059	0.019	-0.019	-0.00681128	-0.0395604	0.256419	-0.0056	0.0101828	25.5317	0.0189762	0.276162	36.537	0	-0.0997191
2020	KSV	Nguyên vật liệu	0.0003	0.9806	0.9806	-0.111638	0.111638	0.0192	0.0739	1.84687	0.0426523	0.00228704	0.0335453	0.0335453	0.712853	29.7794	0.034	0.034	0.0728547	0.00228704	0.392171	0.0192	0.0335453	29.7794	0.712853	0.355075	0.801821	0	0.00288818
2021	KSV	Nguyên vật liệu	0.0004	0.9806	0.9806	-0.0809036	0.0809036	0.0834	0.3338	1.23436	0.176415	0.00228704	0.139784	0.0335453	0.712853	29.7794	0.147	0.147	-0.0434837	0.213288	0.6092	0.0834	0.0366808	30.0677	0.709669	0.456624	0.974423	0	0.296634
2022	KSV	Nguyên vật liệu	0.0003	0.9806	0.9806	-0.261852	0.261852	0.0094	0.0386	1.225	0.0614193	0.213288	0.0790497	0.139784	0.709669	30.0677	0.026	-0.026	0.0273503	0.372512	0.459444	0.0094	0.0225915	30.0003	0.710507	0.491465	0.913525	0	0.533061
2023	KSV	Nguyên vật liệu	0.0003	0.9806	0.9806	-0.159627	0.159627	0.0134	0.0542	2.78318	0.0606917	0.372512	0.0668058	0.0790497	0.710507	30.0003	0.051	0.051	0.0571942	-0.031711	0.445883	0.0134	0.016139	29.8668	0.687738	0.509596	0.898189	0	-0.0276711
2024	KSV	Nguyên vật liệu	0.0001	0.9806	0.9806	-0.287147	0.287147	0.1345	0.3681	2.8088	0.0687271	-0.031711	0.119025	0.0668058	0.687738	29.8668	0.188	0.188	-0.016825	0.143353	0.427704	0.1345	0.0277721	29.8942	0.582829	0.416132	1.06191	0	0.112566
2020	KTS	Tiêu dùng thiết yếu	0.0147	0.2881	0	0.274098	0.274098	0.0087	0.0198	0.859869	-0.00648767	0.147065	-0.314611	-0.314611	0.609998	26.744	0.019	-0.019	0.355111	0.147065	0.726677	0.0087	-0.314611	26.744	0.609998	0.559186	0.948645	0	0.319483
2021	KTS	Tiêu dùng thiết yếu	0.0147	0.2208	0	-0.02238	0.02238	0.0117	0.0298	0.77892	0.0223564	0.147065	0.0331654	-0.314611	0.609998	26.744	0.22	-0.220	0.0113346	0.043477	0.519936	0.0117	0.00937135	26.7498	0.606364	0.516942	1.00302	0	0.0930208
2022	KTS	Tiêu dùng thiết yếu	0.0147	0.2208	0	-0.0232676	0.0232676	0.0212	0.0552	1.09298	-0.00331416	0.043477	0.0485656	0.0331654	0.606364	26.7498	0.23	0.230	-0.0331656	0.123022	0.48123	0.0212	0.0121765	26.8466	0.626414	0.436826	1.03981	0	0.242206
2023	KTS	Tiêu dùng thiết yếu	0.0147	0.2208	0	-0.172535	0.172535	0.0738	0.1935	1.03243	0.00518416	0.123022	0.0436775	0.0485656	0.626414	26.8466	0.034	-0.034	-0.0304775	0.557843	0.411943	0.0738	0.0114475	26.9615	0.611548	0.367238	1.11379	0	0.974011
2024	KTS	Tiêu dùng thiết yếu	0.0147	0.2208	0	0.112417	0.112417	0.0641	0.1432	0.969222	0.0424826	0.557843	0.059153	0.0436775	0.611548	26.9615	0.086	0.086	-0.047553	-0.462983	0.350659	0.0641	0.0156367	26.9034	0.528419	0.371624	1.22973	0	-0.459364
2020	L14	Tiêu dùng không thiết yếu	0.0925	0.3301	0	-0.135446	0.135446	0.0715	0.0962	17.1734	0.0118139	-0.301917	0.0390431	0.0390431	0.321747	26.96	0.353	-0.353	0.00695694	-0.301917	0.0266362	0.0715	0.0390431	26.96	0.321747	0.0241794	2.81175	0	-0.545375
2021	L14	Tiêu dùng không thiết yếu	0.0895	0.3301	0	0.22037	0.22037	0.2565	0.4823	1.51775	0.0281331	-0.301917	-0.361156	0.0390431	0.321747	26.96	0.358	0.358	0.417556	0.0976048	0.0533232	0.2565	-0.0946543	27.7818	0.352262	0.0234423	2.73249	0	0.42722
2022	L14	Tiêu dùng không thiết yếu	0.1014	0.3049	0	0.00339402	0.00339402	0.022	0.04	2.58441	0.0224712	0.0976048	-0.0572209	-0.361156	0.352262	27.7818	0.108	0.108	0.113221	0.00583544	0.0233857	0.022	-0.0198735	27.0633	0.286952	0.047971	2.96874	0	0.040708
2023	L14	Tiêu dùng không thiết yếu	0.0956	0.2725	0	0.0826345	0.0826345	0.0393	0.0582	2.02484	0.0223824	0.00583544	-0.028955	-0.0572209	0.286952	27.0633	0.084	-0.084	0.089755	-0.0685573	0.0637019	0.0393	-0.00474471	27.2246	0.356758	0.0542167	2.40266	0	-0.224028
2024	L14	Tiêu dùng không thiết yếu	0.0956	0.2676	0	-0.157362	0.157362	0.0266	0.0402	2.10943	0.0223963	-0.0685573	0.0725964	-0.028955	0.356758	27.2246	0.133	0.133	-0.0138964	0.00213888	0.0499163	0.0266	0.019609	27.1578	0.31634	0.0533609	2.64199	0	0.010583
2020	LAS	Nguyên vật liệu	0.0001	0.6982	0.6982	-0.576582	0.576582	0.0035	0.0065	1.24133	0.013177	-0.196509	0.331066	0.331066	0.290811	28.1948	0.237	0.237	-0.223866	-0.196509	0.108509	0.0035	0.331066	28.1948	0.290811	0.174547	2.81964	0	-0.194963
2021	LAS	Nguyên vật liệu	0.0001	0.6982	0.6982	0.0104352	0.0104352	0.0331	0.052	0.802974	0.0189004	-0.196509	-0.0298555	0.331066	0.290811	28.1948	0.164	0.164	0.114056	0.288782	0.172462	0.0331	-0.00572255	28.4618	0.419427	0.132044	2.03658	0	0.221248
2022	LAS	Nguyên vật liệu	0.0001	0.6982	0.6982	-0.0523977	0.0523977	0.0387	0.0661	1.13765	0.017553	0.288782	-0.0610268	-0.0298555	0.419427	28.4618	0.432	0.432	0.161427	0.154529	0.128984	0.0387	-0.0172818	28.4552	0.410019	0.12984	2.08439	0	0.126617
2023	LAS	Nguyên vật liệu	0	0.6982	0.6982	-0.720846	0.720846	0.064	0.1074	1.4591	0.0277102	0.154529	0.363638	-0.0610268	0.410019	28.4552	0.025	0.025	-0.345838	0.12482	0.125	0.064	0.0906088	28.4899	0.397706	0.120736	2.18263	0	0.0901812
2024	LAS	Nguyên vật liệu	0	0.6982	0.6982	-0.147921	0.147921	0.0674	0.117	1.36085	0.0207465	0.12482	-0.0371309	0.363638	0.397706	28.4899	0.1	0.100	0.0108309	0.0107917	0.13966	0.0674	-0.00944379	28.6028	0.446979	0.124744	1.9228	0	0.00740454
2020	LBE	Dịch vụ viễn thông	0.0431	0.4711	0	-0.0786381	0.0786381	0.0794	0.0845	1.6043	0.00291331	0.294061	0.116062	0.116062	0.0591016	23.7979	0.098	0.098	-0.112262	0.294061	0.173129	0.0794	0.116062	23.7979	0.0591016	0.171351	13.1797	0	0.0950701
2021	LBE	Dịch vụ viễn thông	0.0245	0.6594	0	0.981144	0.981144	0.0562	0.0715	1.42214	0.0276968	0.294061	-0.460159	0.116062	0.0591016	23.7979	0.211	0.211	0.557059	0.029333	0.18918	0.0562	-0.115634	24.1276	0.325613	0.136038	2.57192	0	0.00874995
2022	LBE	Dịch vụ viễn thông	0.2412	0.6279	0	-0.482711	0.482711	0.0778	0.1004	1.14922	0.000604882	0.029333	0.152945	-0.460159	0.325613	24.1276	0.105	0.105	-0.0679447	0.84544	0.15879	0.0778	0.0444841	23.9431	0.103036	0.190967	7.89599	0	0.347667
2023	LBE	Dịch vụ viễn thông	0.0009	0.8678	0	0.104962	0.104962	0.0609	0.0676	1.88616	0	0.84544	-0.0225758	0.152945	0.103036	23.9431	0.008	-0.008	0.0967758	-0.317042	0.182373	0.0609	-0.00512472	23.9959	0.0970889	0.17299	8.54458	0	-0.0804412
2024	LBE	Dịch vụ viễn thông	0.6488	0.6485	0	0.12867	0.12867	0.085	0.1147	1.48786	0.0189075	-0.317042	-0.0937648	-0.0225758	0.0970889	23.9959	0.155	0.155	0.119665	0.587159	0.163397	0.085	-0.0240602	24.4537	0.360698	0.103383	2.42549	0	0.170796
2020	LDP	Chăm sóc sức khỏe	0.0091	0.8751	0	-0.217283	0.217283	-0.1034	-0.2472	3.20875	-0.00591459	-0.445465	-0.0313674	-0.0313674	0.465048	26.106	0.004	0.004	0.0646674	-0.445465	0.280615	-0.1034	-0.0313674	26.106	0.465048	0.367268	1.3802	1	-0.334165
2021	LDP	Chăm sóc sức khỏe	0.2304	0.8751	0	-0.36255	0.36255	0.1747	0.2807	0.607344	-0.154799	-0.445465	0.133622	-0.0313674	0.465048	26.106	0.019	0.019	-0.0924223	-0.417684	0.282427	0.1747	0.0289376	26.0982	0.289649	0.284632	2.4671	1	-0.359547
2022	LDP	Chăm sóc sức khỏe	0	0.5102	0	0.0129083	0.0129083	-0.1751	-0.2927	1.26955	0.0159183	-0.417684	-0.356446	0.133622	0.289649	26.0982	0.006	-0.006	0.397846	0.118156	0.257241	-0.1751	-0.0887649	26.1543	0.507553	0.243196	1.39947	0	0.157578
2023	LDP	Chăm sóc sức khỏe	0	0.6987	0	-0.366354	0.366354	-0.095	-0.1963	1.20407	0.000258565	0.118156	0.0264283	-0.356446	0.507553	26.1543	0.072	-0.072	0.0151717	-0.00619108	0.203854	-0.095	0.00679252	25.9951	0.525778	0.23904	1.39037	0	-0.0075447
2024	LDP	Chăm sóc sức khỏe	0	0.668	0	-0.441836	0.441836	0.0344	0.0722	1.14621	-0.0145838	-0.00619108	0.045005	0.0264283	0.525778	25.9951	0.032	-0.032	0.245695	0.164074	0.204204	0.0344	0.0103574	26.0567	0.520729	0.191996	1.47718	0	0.171811
2020	LHC	Công nghiệp	0.1147	0.3253	0	-0.52145	0.52145	0.0895	0.2183	2.01646	0.145509	0.171269	0.241189	0.241189	0.352767	27.3212	0.005	-0.005	0.0774108	0.171269	0.47571	0.0895	0.241189	27.3212	0.352767	0.413938	1.56735	0	0.144304
2021	LHC	Công nghiệp	0.1263	0.3087	0	-0.602161	0.602161	0.073	0.1889	0.832781	0.220317	0.171269	0.338693	0.241189	0.352767	27.3212	0.031	-0.031	-0.0334927	0.256358	0.50285	0.073	0.0905524	27.5377	0.430458	0.404943	1.30138	0	0.216927
2022	LHC	Công nghiệp	0.1297	0.3716	0	-0.377462	0.377462	0.0766	0.2059	1.13208	0.143721	0.256358	0.109616	0.338693	0.430458	27.5377	0.141	0.141	-0.0420156	0.396932	0.465537	0.0766	0.0303595	27.6614	0.405714	0.411355	1.35166	0	0.342739
2023	LHC	Công nghiệp	0.1563	0.4209	0	-0.460435	0.460435	0.0767	0.1956	1.31346	0.177201	0.396932	0.202854	0.109616	0.405714	27.6614	0.249	-0.249	-0.105054	-0.288331	0.358195	0.0767	0.053847	27.725	0.372256	0.336145	1.81278	0	-0.209838
2024	LHC	Công nghiệp	0.1804	0.4724	0	-0.468055	0.468055	0.0584	0.0933	1.24286	0.114555	-0.288331	0.281299	0.202854	0.372256	27.725	0.078	0.078	-0.163999	0.077844	0.338921	0.0584	0.0725579	27.8105	0.376412	0.311135	1.4528	0	0.0764001
2020	MAS	Công nghiệp	0.0072	0.3611	0.3611	0.0828724	0.0828724	-0.1005	-0.2234	2.4311	-0.0178523	-1.20909	0.0375126	0.0375126	0.560212	25.2832	0.079	-0.079	-0.00521261	-1.20909	0.567874	-0.1005	0.0375126	25.2832	0.560212	0.743763	0.500453	0	-0.608709
2021	MAS	Công nghiệp	0.0072	0.3611	0.3611	0.213212	0.213212	-0.1732	-0.4258	2.56153	-0.0874161	-1.20909	-0.0503588	0.0375126	0.560212	25.2832	0.091	0.091	0.0869588	-0.546238	0.571318	-0.1732	-0.0109014	25.0509	0.635027	0.720751	0.483755	0	-0.536601
2022	MAS	Công nghiệp	0.0072	0.3611	0.3611	-0.126329	0.126329	0.0177	0.0458	2.57443	-0.000663564	-0.546238	-0.0508334	-0.0503588	0.635027	25.0509	0.327	0.327	0.0756334	0.789235	0.585744	0.0177	-0.0112386	24.9396	0.591296	0.654647	0.552112	0	1.32621
2023	MAS	Công nghiệp	0.0072	0.3611	0.3611	-0.479418	0.479418	0.0525	0.1254	2.75452	0.0258813	0.789235	0.107607	-0.0508334	0.591296	24.9396	0.122	0.122	-0.0846072	0.596579	0.557163	0.0525	0.0254074	24.9912	0.571961	0.529193	0.852425	0	0.385591
2024	MAS	Công nghiệp	0.0893	0.5805	0.3611	-0.740938	0.740938	0.102	0.2249	2.77104	0.0184513	0.596579	0.275548	0.107607	0.571961	24.9912	0.034	0.034	-0.265148	0.447111	0.486452	0.102	0.0706607	24.9985	0.521474	0.482867	1.07076	0	0.219587
2020	MBG	Tiêu dùng không thiết yếu	0.0169	0.2202	0	0.570547	0.570547	0.0441	0.0483	1.08894	0.0381889	0.104316	-0.431902	-0.431902	0.0639844	27.3876	0.098	0.098	0.515502	0.104316	0.0888815	0.0441	-0.431902	27.3876	0.0639844	0.0590084	10.1557	0	0.0818982
2021	MBG	Tiêu dùng không thiết yếu	0.0164	0.1106	0	-0.0620853	0.0620853	0.0972	0.1059	0.449654	0.0212023	0.104316	0.149738	-0.431902	0.0639844	27.3876	0.028	0.028	-0.116638	0.21207	0.0737763	0.0972	0.0449959	27.5294	0.0972404	0.0640239	6.89612	0	0.231799
2022	MBG	Tiêu dùng không thiết yếu	0.1891	0.1891	0	0.486156	0.486156	0.0852	0.0943	0.498724	0.0438368	0.21207	-0.385441	0.149738	0.0972404	27.5294	0.056	0.056	0.437841	0.371353	0.0528317	0.0852	-0.10318	28.0063	0.0939726	0.0327933	8.21029	0	0.379713
2023	MBG	Tiêu dùng không thiết yếu	0.1891	0.1891	0	0.125126	0.125126	-0.0406	-0.0435	0.320875	-0.00664175	0.371353	-0.0678278	-0.385441	0.0939726	28.0063	0.004	-0.004	0.251328	-0.488204	0.0264665	-0.0406	-0.0209253	27.9002	0.0361386	0.0294297	20.5383	0	-0.582894
2024	MBG	Tiêu dùng không thiết yếu	0.1891	0.1891	0	0.0559742	0.0559742	0.0204	0.0215	0.35254	0.0181578	-0.488204	0.0501941	-0.0678278	0.0361386	27.9002	0.07	0.070	0.0969059	-0.150706	0.026364	0.0204	0.0118833	27.9525	0.0648779	0.0250207	10.9887	0	-0.387955
2020	MCC	Nguyên vật liệu	0.0699	0.7495	0	0.145079	0.145079	0.0282	0.0338	0.951882	0	-0.488214	-0.0162138	-0.0162138	0.192829	25.1766	0.022	0.022	0.216014	-0.488214	0.0403124	0.0282	-0.0162138	25.1766	0.192829	0.0383444	1.41904	0	-0.440223
2021	MCC	Nguyên vật liệu	0.0815	0.7509	0	-0.151106	0.151106	0.0239	0.0305	0.770065	0.0582174	-0.488214	0.106068	-0.0162138	0.192829	25.1766	0.058	-0.058	-0.0793681	-0.113786	0.031787	0.0239	0.0271805	25.2554	0.235844	0.0293769	1.23649	0	-0.192697
2022	MCC	Nguyên vật liệu	0.0815	0.8489	0	-0.0444468	0.0444468	0.0388	0.0493	0.880948	-0.0126081	-0.113786	-0.00976385	0.106068	0.235844	25.2554	0.023	-0.023	0.0367638	0.12121	0.0179527	0.0388	-0.00253714	25.1891	0.189045	0.0191826	1.49029	0	0.275125
2023	MCC	Nguyên vật liệu	0.0604	0.9089	0	0.103215	0.103215	0.0017	0.0022	0.85402	0.00431058	0.12121	-0.00226515	-0.00976385	0.189045	25.1891	0.207	-0.207	0.0311652	-0.401559	0.0146204	0.0017	-0.000547533	25.2127	0.206402	0.0142796	1.19842	0	-0.668973
2024	MCC	Nguyên vật liệu	0.0604	0.7568	0	-0.257196	0.257196	0.0151	0.0184	0.91317	0.020695	-0.401559	0.159512	-0.00226515	0.206402	25.2127	0.066	-0.066	-0.128912	0.0578452	0.0111129	0.0151	0.0403482	25.1276	0.151291	0.0121	1.13586	0	0.298062
2020	MCF	Tiêu dùng thiết yếu	0.0075	0.67	0.6	-0.4018	0.4018	0.0617	0.0876	0.922044	0.00368827	0.71833	0.00552067	0.00552067	0.240548	25.7868	0.094	-0.094	0.0695793	0.71833	0.24875	0.0617	0.00552067	25.7868	0.240548	0.284859	2.87347	1	0.312192
2021	MCF	Tiêu dùng thiết yếu	0.0077	0.6	0.6	0.728962	0.728962	0.0564	0.0903	0.845561	0.0160826	0.71833	-0.402815	0.00552067	0.240548	25.7868	0.04	-0.040	0.475915	-0.652678	0.266246	0.0564	-0.0938892	26.156	0.468683	0.184048	1.70431	1	-0.18877
2022	MCF	Tiêu dùng thiết yếu	0.0077	0.6	0	-0.483202	0.483202	0.0517	0.0895	0.850492	1.10092e-05	-0.652678	0.195923	-0.402815	0.468683	26.156	0.131	0.131	-0.117623	-0.0886755	0.153897	0.0517	0.0579217	25.9897	0.366473	0.181745	2.18131	0	-0.0457347
2023	MCF	Tiêu dùng thiết yếu	0.0125	0.6	0	-0.41565	0.41565	0.0598	0.0881	0.816541	-0.0025993	-0.0886755	0.168879	0.195923	0.366473	25.9897	0.077	0.077	-0.0850794	0.106063	0.14675	0.0598	0.0387169	25.8551	0.269169	0.167888	2.99774	0	0.0485403
2024	MCF	Tiêu dùng thiết yếu	0.0051	0.6	0.6	0.175693	0.175693	0.053	0.0798	0.874282	0.00724512	0.106063	-0.138681	0.168879	0.269169	25.8551	0.08	-0.080	0.146881	0.214243	0.139289	0.053	-0.032341	25.9969	0.393732	0.120879	2.23204	0	0.0817375
2020	MDC	Năng lượng	0.0003	0.8199	0.65	-0.131066	0.131066	0.0211	0.1149	0.992876	0.0602646	0.343063	0.0271611	0.0271611	0.833835	28.024	0.277	0.277	-0.0260611	0.343063	0.475007	0.0211	0.0271611	28.024	0.833835	0.381129	0.591745	0	0.196291
2021	MDC	Năng lượng	0.0008	0.8199	0.65	-0.254935	0.254935	0.0227	0.1195	0.913571	0.0762143	0.343063	0.194788	0.0271611	0.833835	28.024	0.046	0.046	-0.193388	-0.112755	0.36941	0.0227	0.0540369	27.8042	0.780281	0.460207	0.509245	0	-0.0672131
2022	MDC	Năng lượng	0.0002	0.8199	0.65	-0.203431	0.203431	0.068	0.3112	0.95119	0.0710566	-0.112755	0.0311036	0.194788	0.780281	27.8042	0.044	-0.044	0.0333964	0.406547	0.430683	0.068	0.00692486	27.9994	0.782253	0.354337	0.874508	0	0.208546
2023	MDC	Năng lượng	0.0001	0.8199	0.65	-0.254361	0.254361	0.0416	0.1623	0.881473	0.0335383	0.406547	0.143455	0.0311036	0.782253	27.9994	0.002	-0.002	-0.0313552	-0.0720126	0.338157	0.0416	0.0393517	27.725	0.692357	0.44489	0.683234	0	-0.0371517
2024	MDC	Năng lượng	0.0001	0.8199	0.65	-0.300484	0.300484	0.0467	0.1577	0.89353	0.0821743	-0.0720126	0.11966	0.143455	0.692357	27.725	0.118	0.118	0.0110398	-0.0774523	0.438622	0.0467	0.0258375	27.8018	0.714776	0.406213	0.69176	0	-0.0315436
2020	MED	Chăm sóc sức khỏe	0.1483	0.6386	0.1137	-0.449046	0.449046	0.0447	0.1393	0.988618	0.0506429	-0.363894	0.157018	0.157018	0.652304	26.9826	0.14	-0.140	-0.113018	-0.363894	0.0911039	0.0447	0.157018	26.9826	0.652304	0.0991566	1.20903	0	-0.284267
2021	MED	Chăm sóc sức khỏe	0.1629	0.6959	0.1137	-0.258277	0.258277	0.0071	0.0208	0.93253	0.102044	-0.363894	0.118578	0.157018	0.652304	26.9826	0.068	0.068	-0.048778	-0.339434	0.0805148	0.0071	0.0283898	26.9389	0.669044	0.0841059	1.02864	0	-0.340385
2022	MED	Chăm sóc sức khỏe	0.1471	0.7037	0.115	-0.166437	0.166437	0.01	0.0247	1.01922	0.166362	-0.339434	-0.0171639	0.118578	0.669044	26.9389	0.131	-0.131	0.104764	0.114148	0.102162	0.01	-0.00419738	27.2713	0.539098	0.0732712	1.21339	0	0.166128
2023	MED	Chăm sóc sức khỏe	0.1471	0.7526	0.1137	-0.104017	0.104017	0.0181	0.0362	0.971702	0.0572533	0.114148	-0.043121	-0.0171639	0.539098	27.2713	0.117	0.117	0.073421	0.00242162	0.061082	0.0181	-0.0125556	27.1183	0.453629	0.0711832	1.26807	0	0.00421396
2024	MED	Chăm sóc sức khỏe	0.0806	0.7037	0.115	-0.297879	0.297879	0.0277	0.0463	0.983716	0.0639065	0.00242162	0.0795732	-0.043121	0.453629	27.1183	0.03	0.030	-0.0488732	0.0674532	0.0575123	0.0277	0.018374	26.9454	0.343206	0.0683694	1.46381	0	0.100299
2020	MEL	Nguyên vật liệu	0.5045	0.6045	0	-0.0902809	0.0902809	0.0133	0.0442	1.07532	0.00772042	-0.155488	0.145278	0.145278	0.680038	27.1258	0.014	-0.014	0.457822	-0.155488	0.129695	0.0133	0.145278	27.1258	0.680038	0.139505	1.17965	0	-0.0938123
2021	MEL	Nguyên vật liệu	0.5045	0.6045	0	0.0241526	0.0241526	0.0962	0.2806	0.807533	-0.0460489	-0.155488	0.10842	0.145278	0.680038	27.1258	0.2	0.200	-0.10702	-0.476082	0.129095	0.0962	0.0261172	27.2843	0.6378	0.110175	1.37991	0	-0.294685
2022	MEL	Nguyên vật liệu	0.6045	0.6	0	-0.0464267	0.0464267	0.0084	0.0226	0.768051	0.00228425	-0.476082	0.0139895	0.10842	0.6378	27.2843	0.077	0.077	0.0220105	0.121953	0.100734	0.0084	0.00377394	27.1901	0.616524	0.110682	1.42209	0	0.125405
2023	MEL	Nguyên vật liệu	0.6045	0.6	0	0.272883	0.272883	0.0069	0.0179	0.781503	0	0.121953	-0.196846	0.0139895	0.616524	27.1901	0.168	0.168	0.238346	-0.159959	0.100708	0.0069	-0.0468961	27.1979	0.612651	0.099925	1.44957	0	-0.133022
2024	MEL	Nguyên vật liệu	0.6045	0.6045	0	0.146951	0.146951	0.0118	0.0318	0.782207	-0.00330235	-0.159959	-0.0321869	-0.196846	0.612651	27.1979	0.16	0.160	0.0609869	0.322315	0.0959171	0.0118	-0.00807816	27.3151	0.644373	0.0853094	1.40489	0	0.311588
2020	MKV	Chăm sóc sức khỏe	0.1949	0.98	0	-0.446423	0.446423	0.0687	0.1247	1.07853	0	0.00955228	0.25445	0.25445	0.395041	25.3233	0.013	-0.013	-0.25015	0.00955228	0.531419	0.0687	0.25445	25.3233	0.395041	0.564672	1.23098	0	0.00986067
2021	MKV	Chăm sóc sức khỏe	0.1949	0.98	0	-0.17455	0.17455	0.0724	0.1177	0.882875	0	0.00955228	-0.0246917	0.25445	0.395041	25.3233	0.065	-0.065	0.0502917	0.184338	0.480453	0.0724	-0.00598565	25.4106	0.376265	0.440292	1.5224	1	0.177334
2022	MKV	Chăm sóc sức khỏe	0.1949	0.5284	0	-0.374089	0.374089	0.055	0.0835	0.734828	0.00516786	0.184338	0.0699329	-0.0246917	0.376265	25.4106	0.015	0.015	-0.0126329	-0.0195784	0.371316	0.055	0.0182458	25.3871	0.305756	0.380146	2.09911	1	-0.0174569
2023	MKV	Chăm sóc sức khỏe	0.1949	0.8869	0	-0.697135	0.697135	0.0607	0.0808	0.69671	0.00756896	-0.0195784	0.239436	0.0699329	0.305756	25.3871	0.117	-0.117	-0.202036	-0.0823089	0.324008	0.0607	0.0591556	25.3116	0.188194	0.34944	3.34747	1	-0.0729588
2024	MKV	Chăm sóc sức khỏe	0.1949	0.8869	0	-0.424311	0.424311	0.0705	0.0877	0.651599	0.00742096	-0.0823089	0.0569212	0.239436	0.188194	25.3116	0.224	0.224	-0.0379212	-0.0393492	0.306412	0.0705	0.0136929	25.4191	0.204065	0.275172	3.44572	1	-0.034886
2020	MVB	Năng lượng	0.0007	0.9819	0.9819	-0.349007	0.349007	0.073	0.1903	1.19241	0.049714	-0.025814	0.141527	0.141527	0.505732	28.9477	0.088	0.088	0.0530729	-0.025814	0.539152	0.073	0.141527	28.9477	0.505732	0.554404	0.807048	0	-0.019975
2021	MVB	Năng lượng	0.0006	0.9819	0.9819	-0.433332	0.433332	0.0777	0.1809	0.940397	0.0485121	-0.025814	0.212157	0.141527	0.505732	28.9477	0.137	0.137	-0.145457	0.0181897	0.517445	0.0777	0.0522996	28.9334	0.45793	0.524906	0.923572	0	0.013967
2022	MVB	Năng lượng	0.0003	0.9819	0.9819	-0.367655	0.367655	0.0494	0.1065	1.05653	0.0106053	0.0181897	0.153255	0.212157	0.45793	28.9334	0.008	0.008	-0.112655	0.149205	0.425933	0.0494	0.0380394	28.8473	0.418681	0.464224	1.17522	0	0.111383
2023	MVB	Năng lượng	0.0003	0.9819	0.9819	-0.348072	0.348072	0.0751	0.1473	0.975894	0.0117833	0.149205	0.191285	0.153255	0.418681	28.8473	0.151	0.151	-0.119185	-0.17553	0.370734	0.0751	0.0457643	28.7658	0.34124	0.40223	1.29107	0	-0.108178
2024	MVB	Năng lượng	0.0003	0.9819	0.9819	-0.34198	0.34198	0.0717	0.1092	0.975448	0.044745	-0.17553	0.0773621	0.191285	0.34124	28.7658	0.035	-0.035	-0.0425621	0.123672	0.376096	0.0717	0.0185525	28.783	0.344978	0.369683	1.36642	0	0.0787712
2020	NAG	Tiêu dùng không thiết yếu	0.3884	0.5219	0	-0.0467902	0.0467902	0.012	0.0435	1.00209	0.0691227	0.0857315	-0.0227053	-0.0227053	0.724816	27.3743	0.311	0.311	0.0299053	0.0857315	0.0459206	0.012	-0.0227053	27.3743	0.724816	0.0379504	1.26431	0	0.0536794
2021	NAG	Tiêu dùng không thiết yếu	0.3887	0.6004	0	0.403598	0.403598	0.0182	0.0881	1.01359	0.0272094	0.0857315	-0.386371	-0.0227053	0.724816	27.3743	0.375	0.375	0.421671	0.424738	0.0377857	0.0182	-0.105772	27.8142	0.809404	0.024338	1.12791	0	0.305401
2022	NAG	Tiêu dùng không thiết yếu	0.0466	0.479	0	-0.143346	0.143346	0.0165	0.0753	0.915554	0.0584467	0.424738	-0.0564667	-0.386371	0.809404	27.8142	0.406	0.406	0.0745667	0.415952	0.0216448	0.0165	-0.0171724	28.0216	0.733526	0.0175911	1.21311	0	0.355706
2023	NAG	Tiêu dùng không thiết yếu	0.0466	0.3774	0	-0.194789	0.194789	0.0159	0.0646	0.966355	0.0176195	0.415952	-0.0017836	-0.0564667	0.733526	28.0216	0.341	0.341	0.0306836	0.144914	0.0695694	0.0159	-0.00049197	28.0954	0.747553	0.0646185	1.18954	0	0.112474
2024	NAG	Tiêu dùng không thiết yếu	0.0466	0.554	0	-0.195474	0.195474	0.0159	0.0649	0.966837	0.0194433	0.144914	0.00712054	-0.0017836	0.747553	28.0954	0.362	0.362	-0.00552054	0.380341	0.0593571	0.0159	0.00184581	28.2216	0.762348	0.0523171	1.18742	0	0.285685
2020	NBC	Năng lượng	0.0003	0.65	0.65	-0.0597386	0.0597386	0.013	0.1	1.04662	0.0615643	-0.0669026	-0.00670234	-0.00670234	0.866884	28.9011	0.165	0.165	0.0308023	-0.0669026	0.507198	0.013	-0.00670234	28.9011	0.866884	0.513052	0.637717	0	-0.0989902
2021	NBC	Năng lượng	0.0001	0.65	0.65	-0.285299	0.285299	0.0128	0.0943	0.949185	0.127818	-0.0669026	0.180076	-0.00670234	0.866884	28.9011	0.016	0.016	-0.138876	0.132894	0.658116	0.0128	0.0447607	28.8755	0.861778	0.675239	0.516944	0	0.215746
2022	NBC	Năng lượng	0	0.65	0.65	-0.378338	0.378338	0.0138	0.0975	0.992193	0.0136674	0.132894	0.154146	0.180076	0.861778	28.8755	0.048	0.048	-0.119546	0.271975	0.565083	0.0138	0.0380416	28.8469	0.855088	0.58146	0.59895	0	0.353971
2023	NBC	Năng lượng	0	0.65	0.65	-0.303943	0.303943	0.0347	0.1957	0.910643	0.0104037	0.271975	0.180739	0.154146	0.855088	28.8469	0.072	0.072	-0.179339	-0.106484	0.467252	0.0347	0.0445394	28.5972	0.781106	0.599807	0.513832	0	-0.0994733
2024	NBC	Năng lượng	0	0.65	0.65	-0.174169	0.174169	0.0143	0.0674	0.928001	0.133477	-0.106484	0.165558	0.180739	0.781106	28.5972	0.081	0.081	-0.149758	-0.170088	0.484109	0.0143	0.036248	28.575	0.795565	0.494948	0.555556	0	-0.137448
2020	NBP	Dịch vụ tiện ích	0.0011	0.9021	0.5476	-0.0915737	0.0915737	0.0793	0.1071	0.954836	0.00346581	-0.418369	0.148322	0.148322	0.215112	26.5497	0.022	-0.022	-0.0960222	-0.418369	0.244781	0.0793	0.148322	26.5497	0.215112	0.265034	3.35895	1	-0.128914
2021	NBP	Dịch vụ tiện ích	0.0012	0.9079	0.5476	-0.149703	0.149703	0.0776	0.0984	0.695697	0.00330408	-0.418369	0.143946	0.148322	0.215112	26.5497	0.235	0.235	-0.0841457	-0.572997	0.23033	0.0776	0.0345568	26.5423	0.206528	0.232041	3.65028	1	-0.187201
2022	NBP	Dịch vụ tiện ích	0.0004	0.8421	0.5476	0.0950111	0.0950111	0.0603	0.0912	0.790849	0.0106496	-0.572997	-0.0667742	0.143946	0.206528	26.5423	0.308	0.308	0.161774	0.26179	0.213681	0.0603	-0.0166318	26.8727	0.433817	0.153561	1.9265	1	0.104451
2023	NBP	Dịch vụ tiện ích	0.0004	0.8421	0.5476	0.0292166	0.0292166	0.0189	0.0336	0.75982	0.106753	0.26179	0.0346678	-0.0667742	0.433817	26.8727	0.115	0.115	-0.0315678	0.0223965	0.233456	0.0189	0.0100858	26.8206	0.438655	0.245949	1.65009	1	0.0112585
2024	NBP	Dịch vụ tiện ích	0.0002	0.7959	0.5476	0.207153	0.207153	-0.0285	-0.0549	0.878008	0.059246	0.0223965	0.158063	0.0346678	0.438655	26.8206	0.053	0.053	-0.153763	0.490769	0.20908	-0.0285	0.038486	26.888	0.520999	0.195439	1.49247	1	0.231565
2020	NBW	Dịch vụ tiện ích	0.0008	0.8346	0.5344	-1.79342	1.79342	0.0629	0.0986	1.26854	0.120606	0.3433	0.309719	0.309719	0.389302	26.3363	0.014	0.014	-0.308219	0.3433	0.634568	0.0629	0.309719	26.3363	0.389302	0.568945	0.974221	0	0.12681
2021	NBW	Dịch vụ tiện ích	0.0007	0.8346	0.5344	-1.12972	1.12972	0.104	0.164	1.06332	0.0576483	0.3433	0.0769571	0.309719	0.389302	26.3363	0.015	-0.015	-0.0765571	-0.00257338	0.510663	0.104	0.0202883	26.3289	0.341862	0.514469	1.2795	0	-0.000940896
2022	NBW	Dịch vụ tiện ích	0.0008	0.8346	0.5344	-1.89072	1.89072	0.0724	0.1186	1.32569	0.105401	-0.00257338	0.319383	0.0769571	0.341862	26.3289	0.267	0.267	-0.310783	0.385376	0.51838	0.0724	0.0795493	26.431	0.431771	0.468067	1.19706	0	0.139993
2023	NBW	Dịch vụ tiện ích	0.0009	0.8346	0.5344	-1.60999	1.60999	0.0839	0.146	1.61872	0.149586	0.385376	0.13308	0.319383	0.431771	26.431	0.004	0.004	-0.12318	0.117645	0.485286	0.0839	0.0349669	26.4359	0.419438	0.482921	1.11687	0	0.0415177
2024	NBW	Dịch vụ tiện ích	0.0012	0.8848	0.5344	-1.71869	1.71869	0.0965	0.169	1.45629	0.0981408	0.117645	0.233781	0.13308	0.419438	26.4359	0.259	0.259	-0.233081	0.0568014	0.595464	0.0965	0.058588	26.5083	0.437994	0.553834	0.886812	0	0.0193408
2020	NDN	Bất động sản	0.0873	0.0848	0	-0.268596	0.268596	0.1499	0.4005	0.962328	-0.000569666	0.380711	0.0234524	0.0234524	0.552445	28.4214	0.02	-0.020	0.00294763	0.380711	0.00260567	0.1499	0.0234524	28.4214	0.552445	0.00258467	1.69994	0	20.0013
2021	NDN	Bất động sản	0.016	0.0848	0	0.118958	0.118958	0.1309	0.2456	0.64879	0.00128343	0.380711	-0.307793	0.0234524	0.552445	28.4214	0.047	-0.047	0.342693	-0.16542	0.00231739	0.1309	-0.0772595	28.1268	0.352007	0.0031113	2.65362	0	-0.417175
2022	NDN	Bất động sản	0.0376	0.0848	0	0.0797506	0.0797506	-0.0911	-0.1458	0.879727	0.000805798	-0.16542	0.0221234	-0.307793	0.352007	28.1268	0.192	-0.192	0.0170766	-0.308192	0.00275246	-0.0911	0.004722	28.0346	0.40112	0.00301835	2.17296	0	-0.993279
2023	NDN	Bất động sản	0.0376	0.0848	0	-0.159612	0.159612	0.1546	0.2238	0.708478	0	-0.308192	-0.178272	0.0221234	0.40112	28.0346	0.02	-0.020	0.213672	0.288757	0.00262484	0.1546	-0.0425144	27.9126	0.205597	0.00296555	3.99276	0	126.266
2024	NDN	Bất động sản	0.0376	0.0848	0	0.0733279	0.0733279	0.0278	0.0338	0.652646	-0.000287031	0.288757	-0.0984526	-0.178272	0.205597	27.9126	0.153	0.153	0.336153	-0.286854	0.00252097	0.0278	-0.0231131	27.8762	0.147934	0.00261449	5.38905	0	-0.872367
2020	NDX	Công nghiệp	0.1546	0.5427	0	0.139509	0.139509	0.0521	0.0961	0.838289	-0.0019509	-0.379415	0.0294256	0.0294256	0.385721	26.0146	0.098	0.098	0.116674	-0.379415	0.451439	0.0521	0.0294256	26.0146	0.385721	0.326215	1.84143	0	-0.506276
2021	NDX	Công nghiệp	0.121	0.4936	0	0.0970642	0.0970642	0.026	0.0453	0.674189	-0.0200484	-0.379415	-0.125334	0.0294256	0.385721	26.0146	0.095	-0.095	0.206334	0.343314	0.301983	0.026	-0.036379	26.035	0.393341	0.295895	1.78976	0	1.28403
2022	NDX	Công nghiệp	0.0922	0.5143	0	0.0605988	0.0605988	0.044	0.0818	0.722972	-0.000502465	0.343314	-0.0803825	-0.125334	0.393341	26.035	0.281	-0.281	0.137082	0.28206	0.272162	0.044	-0.0203003	26.1654	0.44187	0.23888	1.64805	0	0.471378
2023	NDX	Công nghiệp	0.0922	0.6444	0	0.160934	0.160934	0.0179	0.0357	0.682098	0	0.28206	-0.109676	-0.0803825	0.44187	26.1654	0.138	0.138	0.182776	-0.278176	0.218109	0.0179	-0.0292047	26.1688	0.466591	0.217377	1.55474	0	-0.359973
2024	NDX	Công nghiệp	0.0922	0.5457	0	0.050299	0.050299	0.0007	0.0013	0.667579	0.00154988	-0.278176	0.0369893	-0.109676	0.466591	26.1688	0.227	0.227	0.0701107	-0.283313	0.195714	0.0007	0.00926286	26.0871	0.438606	0.212371	1.60617	0	-0.574747
2020	NET	Tiêu dùng thiết yếu	0.0051	0.8825	0.36	-0.69458	0.69458	0.2097	0.3831	2.20152	0.0165935	0.542598	0.12149	0.12149	0.443502	27.2681	0.308	-0.308	0.0932103	0.542598	0.4333	0.2097	0.12149	27.2681	0.443502	0.359084	1.26047	1	0.270284
2021	NET	Tiêu dùng thiết yếu	0.0051	0.8825	0.36	-0.683608	0.683608	0.1619	0.3042	1.79522	0.0184604	0.542598	0.221979	0.12149	0.443502	27.2681	0.047	-0.047	-0.0164791	0.0137008	0.353025	0.1619	0.0606925	27.2808	0.491716	0.348581	1.17207	1	0.00648306
2022	NET	Tiêu dùng thiết yếu	0	0.8825	0.36	-0.480506	0.480506	0.1205	0.2547	2.53987	0.00186487	0.0137008	0.0665613	0.221979	0.491716	27.2808	0.145	0.145	0.127739	0.0713466	0.321566	0.1205	0.0167457	27.3552	0.559582	0.298501	1.13334	1	0.0339706
2023	NET	Tiêu dùng thiết yếu	0	0.8825	0.36	-1.08361	1.08361	0.2159	0.4643	2.46874	0.0165688	0.0713466	0.247331	0.0665613	0.559582	27.3552	0.072	-0.072	-0.0551306	0.368595	0.276343	0.2159	0.0641327	27.5188	0.514111	0.234646	1.361	1	0.18285
2024	NET	Tiêu dùng thiết yếu	0	0.8825	0.36	-0.672176	0.672176	0.2198	0.429	2.21689	0.00872894	0.368595	0.261261	0.247331	0.514111	27.5188	0.048	-0.048	-0.0771611	-0.175642	0.227693	0.2198	0.0706451	27.6172	0.463729	0.206341	1.56677	1	-0.086752
2020	NFC	Nguyên vật liệu	0.1223	0.7182	0.51	-0.300468	0.300468	0.0382	0.0503	1.07503	-0.000517719	-0.191165	0.0501859	0.0501859	0.249573	26.2123	0.102	-0.102	-0.0308859	-0.191165	0.0735836	0.0382	0.0501859	26.2123	0.249573	0.0724239	3.73159	0	-0.095253
2021	NFC	Nguyên vật liệu	0.1223	0.7182	0.51	-0.291309	0.291309	0.0565	0.0739	1.18871	0.00187704	-0.191165	0.118196	0.0501859	0.249573	26.2123	0.19	-0.190	-0.0978965	0.511214	0.0520382	0.0565	0.0297838	26.1993	0.220754	0.0527193	4.28666	0	0.286052
2022	NFC	Nguyên vật liệu	0.1196	0.7182	0.51	-0.155227	0.155227	0.0917	0.1335	1.06581	0.016152	0.511214	-0.223169	0.118196	0.220754	26.1993	0.011	-0.011	0.242369	0.594487	0.047633	0.0917	-0.0554295	26.4911	0.382139	0.0355799	2.52085	0	0.255316
2023	NFC	Nguyên vật liệu	0.1196	0.7182	0.51	-0.572686	0.572686	0.0923	0.1397	1.26358	0.000805412	0.594487	0.205638	-0.223169	0.382139	26.4911	0.223	-0.223	-0.133038	0.0883215	0.0231534	0.0923	0.0588561	26.3935	0.292929	0.0255266	3.32231	0	0.0404532
2024	NFC	Nguyên vật liệu	0.1196	0.7309	0.51	-0.980199	0.980199	0.14	0.2096	1.12661	0.0100404	0.0883215	0.477209	0.205638	0.292929	26.3935	0.301	0.301	-0.454809	0.647464	0.0244935	0.14	0.113486	26.5781	0.364621	0.0203657	2.68291	0	0.258524
2020	NHC	Nguyên vật liệu	0.0957	0.5022	0	-0.090482	0.090482	0.1723	0.1909	1.44416	0.00106638	-0.504226	0.0570682	0.0570682	0.0887406	24.9655	0.051	0.051	-0.0870682	-0.504226	0.144115	0.1723	0.0570682	24.9655	0.0887406	0.139528	5.78865	0	-0.316929
2021	NHC	Nguyên vật liệu	0.0957	0.5022	0	-0.0921082	0.0921082	0.1437	0.1572	1.46672	-0.440883	-0.504226	0.0542673	0.0570682	0.0887406	24.9655	0.111	0.111	0.115733	-0.640796	0.126778	0.1437	0.0137863	25.0056	0.080536	0.121797	11.687	0	-0.609033
2022	NHC	Nguyên vật liệu	0.0957	0.5021	0	-0.0335771	0.0335771	0.045	0.048	1.51842	0.0101361	-0.640796	-0.0407727	0.0542673	0.080536	25.0056	0.07	0.070	0.221173	0.0658457	0.124439	0.045	-0.0103974	24.8317	0.0389392	0.148071	21.2937	0	0.166615
2023	NHC	Nguyên vật liệu	0.0937	0.5021	0	0.0158719	0.0158719	-0.0162	-0.0181	1.28171	-0.000746967	0.0658457	-0.0065401	-0.0407727	0.0389392	24.8317	0.088	0.088	0.18304	-0.324697	0.130518	-0.0162	-0.00149324	24.8965	0.162055	0.122332	5.38426	0	-0.59187
2024	NHC	Nguyên vật liệu	0.0937	0.5897	0	-0.299989	0.299989	0.0069	0.01	1.37668	-0.051561	-0.324697	0.185546	-0.0065401	0.162055	24.8965	0.099	-0.099	-0.0294465	0.554572	0.995565	0.0069	0.0478884	25.2679	0.416926	0.686725	0.644302	0	2.64264
2020	NSH	Nguyên vật liệu	0.3491	0.4783	0	0.117967	0.117967	0.0047	0.0163	0.969793	-0.0131289	-0.097418	-0.0343779	-0.0343779	0.717079	27.4704	0.026	-0.026	0.0351779	-0.097418	0.201218	0.0047	-0.0343779	27.4704	0.717079	0.19029	1.10614	0	-0.0837004
2021	NSH	Nguyên vật liệu	0.3338	0.5442	0	0.000884082	0.000884082	0.0051	0.018	0.824277	0.00313218	-0.097418	0.0225894	-0.0343779	0.717079	27.4704	0.021	0.021	-0.0215894	0.212537	0.178019	0.0051	0.00580499	27.4315	0.715648	0.185075	1.11967	0	0.210734
2022	NSH	Nguyên vật liệu	0.3081	0.5185	0	0.107313	0.107313	0.0041	0.0146	0.842561	0.00340971	0.212537	-0.00191966	0.0225894	0.715648	27.4315	0.075	-0.075	0.00281966	0.0747588	0.171841	0.0041	-0.00047059	27.4418	0.715045	0.170077	1.14996	0	0.058889
2023	NSH	Nguyên vật liệu	0.3072	0.5185	0	0.125614	0.125614	0.001	0.0038	0.83918	0.00458821	0.0747588	-0.0179329	-0.00191966	0.715045	27.4418	0.096	0.096	0.0190329	-0.0392924	0.159474	0.001	-0.00450636	27.5288	0.738327	0.146194	1.14438	0	-0.0295332
2024	NSH	Nguyên vật liệu	0.299	0.5103	0	-0.0389363	0.0389363	0.0021	0.0079	0.838789	0.00149814	-0.0392924	0.035815	-0.0179329	0.738327	27.5288	0.104	-0.104	0.058485	-0.061591	0.131756	0.0021	0.00934274	27.5392	0.738979	0.130394	1.16608	0	-0.0520352
2020	NST	Tiêu dùng thiết yếu	0.0003	0.8037	0.7528	-0.699596	0.699596	0.002	0.0051	0.846441	0.0338722	-0.700377	0.540769	0.540769	0.524951	26.5965	0.114	-0.114	-0.460369	-0.700377	0.181061	0.002	0.540769	26.5965	0.524951	0.272792	1.3767	0	-0.369263
2021	NST	Tiêu dùng thiết yếu	0.1218	0.7528	0.7528	-0.321247	0.321247	0.0191	0.0371	0.652431	-0.00441563	-0.700377	-0.0347373	0.540769	0.524951	26.5965	0.065	0.065	0.141737	0.0431009	0.216205	0.0191	-0.00692908	26.4663	0.440595	0.24629	1.63209	0	0.023913
2022	NST	Tiêu dùng thiết yếu	0.0004	0.7528	0.7528	-0.514853	0.514853	0.0236	0.0406	0.68495	0.0211371	0.0431009	0.143983	-0.0347373	0.440595	26.4663	0.001	0.001	0.0996173	-0.276723	0.193673	0.0236	0.0336542	26.3941	0.395508	0.208171	1.84612	0	-0.131628
2023	NST	Tiêu dùng thiết yếu	0.0016	0.8038	0.7529	-0.669318	0.669318	0.034	0.0633	0.817208	0	-0.276723	0.282452	0.143983	0.395508	26.3941	0.256	0.256	-0.0285516	0.471664	0.17717	0.034	0.0680652	26.6403	0.515506	0.138506	1.55624	0	0.24037
2024	NST	Tiêu dùng thiết yếu	0.0016	0.8037	0.577	-0.101396	0.101396	0.0549	0.0996	0.758708	0.0351173	0.471664	-0.272899	0.282452	0.515506	26.6403	0.016	0.016	0.382899	0.438992	0.114278	0.0549	-0.0765808	26.4121	0.364537	0.14356	2.11428	0	0.230713
2020	NTP	Nguyên vật liệu	0.0806	0.7176	0.371	-0.67771	0.67771	0.1059	0.1734	2.30088	0.0257082	-0.0412454	0.203066	0.203066	0.335299	28.9908	0.011	0.011	-0.0437659	-0.0412454	0.348018	0.1059	0.203066	28.9908	0.335299	0.406705	1.32119	1	-0.0401728
2021	NTP	Nguyên vật liệu	0.0724	0.7177	0.371	-0.297481	0.297481	0.1064	0.1766	1.21671	-0.132395	-0.0412454	0.0808823	0.203066	0.335299	28.9908	0.065	0.065	0.0646177	0.086618	0.375804	0.1064	0.0186482	29.2199	0.447148	0.298868	1.25224	1	0.0752129
2022	NTP	Nguyên vật liệu	0.0737	0.7278	0.371	-0.231083	0.231083	0.0963	0.1732	1.53104	0.021698	0.086618	-0.0236713	0.0808823	0.447148	29.2199	0.01	0.010	0.262271	0.175899	0.288013	0.0963	-0.00659266	29.2531	0.440974	0.278592	1.37742	1	0.178622
2023	NTP	Nguyên vật liệu	0.0761	0.7324	0.371	-0.658672	0.658672	0.1064	0.1882	2.02773	0.017093	0.175899	0.223707	-0.0236713	0.440974	29.2531	0.024	0.024	-0.0427071	-0.100566	0.26236	0.1064	0.0568567	29.3273	0.428736	0.243605	1.49739	1	-0.089576
2024	NTP	Nguyên vật liệu	0.0814	0.7274	0.371	-0.782638	0.782638	0.124	0.2169	1.72121	0.008938	-0.100566	0.363795	0.223707	0.428736	29.3273	0.043	0.043	-0.0957948	0.0881422	0.232041	0.124	0.09432	29.4896	0.428457	0.197273	1.62739	1	0.0928736
2020	OCH	Tiêu dùng thiết yếu	0.0002	0.5985	0	-0.19227	0.19227	0.1022	0.2069	1.04857	-0.00337021	-0.0932001	0.0204241	0.0204241	0.354458	28.6274	0.005	-0.005	-0.0190241	-0.0932001	0.243048	0.1022	0.0204241	28.6274	0.354458	0.280705	2.83679	0	-0.247827
2021	OCH	Tiêu dùng thiết yếu	0.0002	0.5985	0	-0.125507	0.125507	-0.1794	-0.31	1.11994	0.00328923	-0.0932001	-0.0446459	0.0204241	0.354458	28.6274	0.019	0.019	0.0618459	-0.179323	0.258716	-0.1794	-0.010359	28.4271	0.42522	0.316113	1.83124	0	-0.5489
2022	OCH	Tiêu dùng thiết yếu	0	0.0986	0	-0.514039	0.514039	0.0419	0.076	1.01829	0.0133978	-0.179323	0.162046	-0.0446459	0.42522	28.4271	0.141	0.141	-0.174246	0.269032	0.302867	0.0419	0.0364663	28.4633	0.417904	0.292092	1.89489	0	1.49406
2023	OCH	Tiêu dùng thiết yếu	0	0.1632	0	-0.320456	0.320456	0.0405	0.0968	0.846525	0.913684	0.269032	0.0614062	0.162046	0.417904	28.4633	0.049	-0.049	-0.0606062	-0.0090665	0.223046	0.0405	0.0156296	29.0502	0.570736	0.124026	0.961425	0	-0.0209329
2024	OCH	Tiêu dùng thiết yếu	0	0.7192	0	-0.22737	0.22737	0.0445	0.0964	0.788624	0.0890267	-0.0090665	0.063861	0.0614062	0.570736	29.0502	0.075	0.075	-0.054761	0.0021884	0.116809	0.0445	0.0205202	28.9799	0.503151	0.125308	1.0655	0	0.00928088
2020	ONE	Dịch vụ viễn thông	0.2004	0.1125	0	-0.127604	0.127604	0.0154	0.0626	0.931593	0.0675224	0.830775	0.0188031	0.0188031	0.800541	26.9093	0.285	0.285	-0.0173031	0.830775	0.0670809	0.0154	0.0188031	26.9093	0.800541	0.0414212	1.22903	0	0.646307
2021	ONE	Dịch vụ viễn thông	0.2032	0.1125	0	-0.0943252	0.0943252	0.0132	0.0688	0.904038	0	0.830775	0.0632917	0.0188031	0.800541	26.9093	0.366	0.366	0.0535083	0.145375	0.0369497	0.0132	0.0195649	26.9972	0.814015	0.0338423	1.21036	0	0.111253
2022	ONE	Dịch vụ viễn thông	0.1955	0.1837	0	0.156523	0.156523	0.0116	0.0607	0.889543	0.000150788	0.145375	-0.113164	0.0632917	0.814015	26.9972	0.298	0.298	0.292564	0.0380856	0.0298991	0.0116	-0.0295328	26.9616	0.804031	0.0309827	1.22443	0	0.0286364
2023	ONE	Dịch vụ viễn thông	0.1375	0.221	0	0.019398	0.019398	0.0041	0.0179	0.83959	6.21101e-05	0.0380856	0.0370884	-0.113164	0.804031	26.9616	0.152	-0.152	0.237712	-0.39413	0.0267677	0.0041	0.00910709	26.6285	0.724613	0.0373491	1.35229	0	-0.27802
2024	ONE	Dịch vụ viễn thông	0.1375	0.1125	0	-0.118004	0.118004	0.0036	0.0126	0.817156	0.00926058	-0.39413	-0.0203208	0.0370884	0.724613	26.6285	0.101	0.101	0.427021	0.154616	0.0313752	0.0036	-0.00424181	26.5478	0.698224	0.0340122	1.40149	0	0.108267
2020	PBP	Nguyên vật liệu	0	0.7575	0	-0.361708	0.361708	0.046	0.0898	0.976778	0.00368096	0.394009	0.136147	0.136147	0.397178	25.3629	0.172	0.172	-0.0397466	0.394009	0.352211	0.046	0.136147	25.3629	0.397178	0.472091	1.44945	1	0.244326
2021	PBP	Nguyên vật liệu	0	0.7675	0	-0.421429	0.421429	0.0564	0.0923	0.972849	0.012323	0.394009	0.228509	0.136147	0.397178	25.3629	1024	1024	-0.134709	0.498236	0.392736	0.0564	0.0488191	25.3496	0.380801	0.397987	1.63001	1	0.185243
2022	PBP	Nguyên vật liệu	0	0.6369	0	-0.543541	0.543541	0.056	0.1055	0.924271	0.0231472	0.498236	0.506965	0.228509	0.380801	25.3496	0.015	0.015	-0.414665	0.250402	0.347702	0.056	0.1259	25.6564	0.533561	0.255857	1.3762	1	0.077512
2023	PBP	Nguyên vật liệu	0	0.6369	0	-0.138694	0.138694	0.0608	0.1217	0.962812	0.0460771	0.250402	-0.000696487	0.506965	0.533561	25.6564	0.379	-0.379	0.0935965	0.030127	0.246807	0.0608	-0.000200619	25.5522	0.463948	0.273918	1.56518	1	0.0117618
2024	PBP	Nguyên vật liệu	0	0.6369	0	0.221509	0.221509	0.0587	0.1199	0.958304	0.0200747	0.030127	-0.048112	-0.000696487	0.463948	25.5522	0.096	-0.096	0.066812	0.0839279	0.348402	0.0587	-0.0114018	25.7492	0.548666	0.286088	1.40794	1	0.0291799
2020	PCE	Nguyên vật liệu	0.002	0.885	0	0.528002	0.528002	0.0641	0.0795	1.19659	0.00946501	-0.313669	-0.0330791	-0.0330791	0.184411	26.0045	0.01	-0.010	0.0394791	-0.313669	0.158826	0.0641	-0.0330791	26.0045	0.184411	0.164453	4.38491	1	-0.0331345
2021	PCE	Nguyên vật liệu	0.003	0.885	0	0.342899	0.342899	0.2736	0.3619	1.02326	0.00973644	-0.313669	-0.0521653	-0.0330791	0.184411	26.0045	0.336	0.336	0.0608653	5.96803	0.155154	0.2736	-0.0128143	26.3736	0.284861	0.107258	3.06555	1	0.62973
2022	PCE	Nguyên vật liệu	0	0.885	0	0.25519	0.25519	0.1072	0.1471	0.994746	0.00201012	5.96803	0.228018	-0.0521653	0.284861	26.3736	0.43	0.430	-0.169818	1.59553	0.0951056	0.1072	0.0674092	26.3198	0.256285	0.100372	3.43675	1	0.149433
2023	PCE	Nguyên vật liệu	0	0.885	0	-0.207203	0.207203	0.0842	0.1082	0.970722	0.00947175	1.59553	0.451088	0.228018	0.256285	26.3198	0.25	0.250	-0.413888	-1.17412	0.102842	0.0842	0.109734	26.153	0.181575	0.121501	4.72499	1	-0.0906494
2024	PCE	Nguyên vật liệu	0	0.885	0.75	0.564692	0.564692	0.1004	0.1453	0.944943	0.00600958	-1.17412	0.140515	0.451088	0.181575	26.153	0.32	0.320	-0.102015	-0.103622	0.118216	0.1004	0.0322071	26.5048	0.399096	0.0831551	2.26284	1	-0.00744666
2020	PEN	Công nghiệp	0.1442	0.352	0	-0.0360649	0.0360649	0.0178	0.0763	0.887263	0.00569563	-0.194271	0.070655	0.070655	0.774458	26.6666	0.11	-0.110	-0.008055	-0.194271	0.0994751	0.0178	0.070655	26.6666	0.774458	0.0888238	1.206	0	-0.187072
2021	PEN	Công nghiệp	0.1343	0.352	0	-0.194827	0.194827	-0.0263	-0.1089	0.868757	0.0066319	-0.194271	0.14349	0.070655	0.774458	26.6666	0.048	-0.048	-0.0268901	-0.408474	0.0770774	-0.0263	0.0379017	26.3304	0.736581	0.107874	1.29403	0	-0.541872
2022	PEN	Công nghiệp	0.09	0.352	0	0.0765473	0.0765473	0.0016	0.0058	0.869469	-0.00284689	-0.408474	-0.0993408	0.14349	0.736581	26.3304	0.182	-0.182	0.152341	0.0941792	0.0838052	0.0016	-0.0206999	26.1824	0.692785	0.0971782	1.19673	0	0.194855
2023	PEN	Công nghiệp	0.09	0.438	0.3	-0.116127	0.116127	-0.063	-0.2398	0.913033	-7.66338e-06	0.0941792	0.138698	-0.0993408	0.692785	26.1824	0.114	-0.114	-0.131198	-0.0992317	0.0799221	-0.063	0.0321125	26.266	0.777934	0.0735105	1.25063	0	-0.148181
2024	PEN	Công nghiệp	0.1348	0.386	0.3	0.0201538	0.0201538	0.0038	0.0177	0.898248	0.0122837	-0.0992317	-0.0833335	0.138698	0.777934	26.266	0.025	0.025	0.125334	0.526588	0.0634058	0.0038	-0.021704	26.3306	0.788124	0.0594372	1.2138	0	1.00366
2020	PGN	Nguyên vật liệu	0.4239	0.3112	0	0.0315923	0.0315923	0.0969	0.2276	0.985633	0.112762	0.547123	0.00789121	0.00789121	0.569821	25.3974	0.156	0.156	-0.0809912	0.547123	0.248007	0.0969	0.00789121	25.3974	0.569821	0.212771	2.00012	0	0.452947
2021	PGN	Nguyên vật liệu	0.3468	0.266	0	0.168535	0.168535	0.085	0.1636	0.776009	0.0422624	0.547123	-0.046763	0.00789121	0.569821	25.3974	0.053	-0.053	0.058963	0.0843774	0.254533	0.085	-0.0125847	25.7601	0.418275	0.177107	2.30129	0	0.056039
2022	PGN	Nguyên vật liệu	0.3942	0.4815	0	0.204607	0.204607	0.0742	0.1341	0.845744	0.0319035	0.0843774	-0.0614429	-0.046763	0.418275	25.7601	0.108	-0.108	0.0960429	0.644851	0.198765	0.0742	-0.0181161	25.9861	0.469212	0.158561	1.86887	0	0.582845
2023	PGN	Nguyên vật liệu	0.4486	0.4816	0	0.0567172	0.0567172	0.0259	0.0499	1.02151	0.0156705	0.644851	0.00381641	-0.0614429	0.469212	25.9861	0.004	-0.004	0.0917836	-0.284764	0.149829	0.0259	0.00106145	26.0711	0.490671	0.13762	1.73662	0	-0.203837
2024	PGN	Nguyên vật liệu	0.1845	0.0694	0	0.0866017	0.0866017	0.0038	0.007	1.17291	0.0195434	-0.284764	0.0261868	0.00381641	0.490671	26.0711	0.112	0.112	0.0592132	0.0300451	0.117113	0.0038	0.00682474	25.982	0.439306	0.128021	1.95894	0	0.029409
2020	PGS	Dịch vụ tiện ích	0	0.3526	0	-0.425224	0.425224	0.0252	0.0577	1.07519	0.0178779	-0.731792	-0.0230045	-0.0230045	0.579552	28.4856	0.067	0.067	0.0907045	-0.731792	0.21693	0.0252	-0.0230045	28.4856	0.579552	0.19955	0.985456	1	-0.247895
2021	PGS	Dịch vụ tiện ích	0	0.3526	0	-0.695589	0.695589	0.0333	0.0794	1.14243	0.0111744	-0.731792	0.278047	-0.0230045	0.579552	28.4856	0.037	0.037	-0.236247	0.34635	0.182024	0.0333	0.0724123	28.5107	0.582264	0.177529	1.00447	1	0.169583
2022	PGS	Dịch vụ tiện ích	0	0.3526	0	-0.368469	0.368469	0.0412	0.0976	1.14899	0.0393964	0.34635	-0.0714816	0.278047	0.582264	28.5107	0.038	0.038	0.109282	0.500426	0.161941	0.0412	-0.0180938	28.5021	0.573546	0.163334	1.01809	1	0.214801
2023	PGS	Dịch vụ tiện ích	0	0.3526	0	-0.55542	0.55542	0.0414	0.1047	1.24117	0.0331698	0.500426	0.136132	-0.0714816	0.573546	28.5021	0.001	-0.001	-0.111332	-0.478493	0.160087	0.0414	0.0338871	28.6381	0.631152	0.139726	1.0329	1	-0.167628
2024	PGS	Dịch vụ tiện ích	0	0.3526	0.3526	-0.550682	0.550682	0.0416	0.1146	1.22004	0.0218208	-0.478493	0.121	0.136132	0.631152	28.6381	0.009	-0.009	-0.0662004	0.278097	0.139697	0.0416	0.0323044	28.6753	0.642875	0.134595	1.06062	1	0.134099
2020	PHN	Công nghiệp	0.0715	0.5402	0	-0.9211	0.9211	0.2907	0.3694	2.30573	0.0196965	0.11996	0.354783	0.354783	0.148355	25.6273	0.074	-0.074	-0.313483	0.11996	0.139078	0.2907	0.354783	25.6273	0.148355	0.139678	4.82847	0	0.0492094
2021	PHN	Công nghiệp	0.0715	0.5957	0	-0.156535	0.156535	0.1995	0.27	2.03485	0.0238105	0.11996	0.0544537	0.354783	0.148355	25.6273	0.027	-0.027	-0.0176537	0.133102	0.114158	0.1995	0.0135841	25.8596	0.350342	0.0904901	2.25094	0	0.0518157
2022	PHN	Công nghiệp	0.0699	0.5983	0	-0.882464	0.882464	0.2317	0.3114	2.27805	0.00466794	0.133102	0.350665	0.0544537	0.350342	25.8596	0.02	0.020	-0.326565	0.570877	0.0688051	0.2317	0.0978051	25.7142	0.14731	0.0795777	5.30011	0	0.266555
2023	PHN	Công nghiệp	0.0699	0.5983	0	-0.685812	0.685812	0.3186	0.3751	3.75189	0.0209504	0.570877	0.312397	0.350665	0.14731	25.7142	0.088	-0.088	-0.287797	-0.255267	0.0720236	0.3186	0.0724293	25.8787	0.153777	0.061095	5.3948	0	-0.0813663
2024	PHN	Công nghiệp	0.0699	0.599	0	-0.825469	0.825469	0.3052	0.3887	3.01562	0.0247247	-0.255267	0.303554	0.312397	0.153777	25.8787	0.005	0.005	-0.265754	0.138419	0.053757	0.3052	0.0821187	26.0627	0.265807	0.0447234	3.16383	0	0.0566202
2020	PJC	Năng lượng	0.048	0.5106	0	-0.161478	0.161478	0.0676	0.1447	1.20817	0.04496	-1.44052	0.188237	0.188237	0.460676	26.1629	0.101	0.101	-0.113337	-1.44052	0.57917	0.0676	0.188237	26.1629	0.460676	0.692803	0.702775	0	-0.35364
2021	PJC	Năng lượng	0.029	0.5106	0	-0.270894	0.270894	0.0978	0.1629	1.21473	-0.00357724	-1.44052	0.192383	0.188237	0.460676	26.1629	0.053	-0.053	0.00991661	0.272966	0.499368	0.0978	0.0437991	25.9917	0.327717	0.592575	1.33303	0	0.0866706
2022	PJC	Năng lượng	0.0279	0.5106	0	-0.650791	0.650791	0.1173	0.1843	1.15973	0.014502	0.272966	0.362132	0.192383	0.327717	25.9917	0.01	-0.010	-0.351832	2.10621	0.397651	0.1173	0.0828053	26.1547	0.393304	0.337844	1.74195	0	0.518613
2023	PJC	Năng lượng	0.0279	0.5106	0	-0.500591	0.500591	0.1379	0.2179	1.19505	0.131822	2.10621	0.188066	0.362132	0.393304	26.1547	0.03	-0.030	-0.169666	0.017761	0.33129	0.1379	0.0508398	26.1688	0.341364	0.32664	2.02281	0	0.00338961
2024	PJC	Năng lượng	0.0279	0.5106	0.5106	-0.682321	0.682321	0.1095	0.1725	1.17337	0.134803	0.017761	0.311778	0.188066	0.341364	26.1688	0.108	0.108	-0.279678	-0.0531263	0.501633	0.1095	0.0784954	26.2519	0.387719	0.461661	1.01095	0	-0.0102485
2020	PLC	Nguyên vật liệu	0.0064	0.7907	0.7907	-0.339714	0.339714	0.0323	0.1147	1.53182	0.0119657	-0.123557	0.107938	0.107938	0.732779	29.179	0.163	0.163	-0.0639385	-0.123557	0.19703	0.0323	0.107938	29.179	0.732779	0.187073	1.04305	1	-0.0895466
2021	PLC	Nguyên vật liệu	0.0001	0.7907	0.7907	-0.265814	0.265814	0.0366	0.1327	1.16068	0.0091205	-0.123557	0.0696421	0.107938	0.732779	29.179	0.006	0.006	-0.0195421	0.267955	0.174107	0.0366	0.0178619	29.2054	0.715509	0.169568	1.09541	1	0.224651
2022	PLC	Nguyên vật liệu	0.0004	0.7907	0.7907	-0.130441	0.130441	0.0248	0.0899	1.27264	0.00758101	0.267955	-0.0778557	0.0696421	0.715509	29.2054	0.02	0.020	0.125056	0.358873	0.154264	0.0248	-0.019721	29.1617	0.734132	0.161163	1.08824	1	0.252259
2023	PLC	Nguyên vật liệu	0.0004	0.7907	0.7907	-0.294774	0.294774	0.023	0.0802	1.09041	0.0125561	0.358873	0.0895753	-0.0778557	0.734132	29.1617	0.045	0.045	-0.0573753	-0.138562	0.152761	0.023	0.021904	29.0754	0.690173	0.166521	1.15013	1	-0.0744484
2024	PLC	Nguyên vật liệu	0.0001	0.7907	0.7907	-0.249679	0.249679	0.0104	0.0337	1.13731	0.0231756	-0.138562	0.00138983	0.0895753	0.690173	29.0754	0.017	0.017	0.00981017	-0.242702	0.151353	0.0104	0.000332482	29.0371	0.69371	0.157267	1.15154	1	-0.129249
2020	PMB	Nguyên vật liệu	0.0035	0.75	0	-0.105589	0.105589	0.0468	0.0618	1.07901	0.00484231	-0.453839	0.14336	0.14336	0.258035	25.9627	0.039	0.039	-0.10146	-0.453839	0.0666788	0.0468	0.14336	25.9627	0.258035	0.0663067	3.42662	1	-0.0617936
2021	PMB	Nguyên vật liệu	0.0012	0.85	0.1	-0.109023	0.109023	0.1838	0.2542	0.868283	0.00156387	-0.453839	0.0828457	0.14336	0.258035	25.9627	0.167	-0.167	-0.0380457	4.05377	0.0484348	0.1838	0.0207694	26.1587	0.292874	0.0398107	3.18191	1	0.591605
2022	PMB	Nguyên vật liệu	0.0012	0.85	0.1	0.272126	0.272126	0.0836	0.1128	0.826464	0.00621043	4.05377	-0.0266995	0.0828457	0.292874	26.1587	0.048	-0.048	0.0407995	2.96078	0.0302854	0.0836	-0.00732721	26.0101	0.219547	0.0351381	4.23052	1	0.330294
2023	PMB	Nguyên vật liệu	0.0007	0.85	0.1	0.243042	0.243042	0.0331	0.0424	0.829592	0.00818492	2.96078	0.196298	-0.0266995	0.219547	26.0101	0.012	0.012	-0.152898	-2.9801	0.0268685	0.0331	0.0454344	25.9432	0.219634	0.0287267	4.23893	1	-0.215393
2024	PMB	Nguyên vật liệu	0.0007	0.85	0.85	0.224121	0.224121	0.0524	0.0691	0.840136	0.00487091	-2.9801	0.158984	0.196298	0.219634	25.9432	0.023	0.023	-0.0864843	0.0376075	0.0201131	0.0524	0.0384176	25.9852	0.261463	0.0192867	3.65399	1	0.00324028
2020	PMC	Chăm sóc sức khỏe	0.0059	0.5213	0.4344	-0.776202	0.776202	0.1835	0.2143	1.58899	0.0245448	-0.0104327	0.210069	0.210069	0.151215	26.7848	0.029	-0.029	-0.167069	-0.0104327	0.177929	0.1835	0.210069	26.7848	0.151215	0.159291	5.48609	0	-0.00862211
2021	PMC	Chăm sóc sức khỏe	0.008	0.5213	0.4344	-0.582149	0.582149	0.1471	0.172	1.60629	0.00845335	-0.0104327	0.146478	0.210069	0.151215	26.7848	0.001	-0.001	-0.127078	-0.108453	0.132598	0.1471	0.0386435	26.8358	0.138688	0.126007	6.21304	0	-0.100989
2022	PMC	Chăm sóc sức khỏe	0.0055	0.5804	0.4344	-0.525365	0.525365	0.1764	0.2043	1.62634	0.00900335	-0.108453	0.0819351	0.146478	0.138688	26.8358	0.057	0.057	0.0591649	0.128555	0.107689	0.1764	0.0210058	26.9261	0.134262	0.0983983	6.64949	0	0.140119
2023	PMC	Chăm sóc sức khỏe	0.0055	0.5804	0.4344	-0.674674	0.674674	0.1816	0.2168	2.84355	0.0158602	0.128555	0.191632	0.0819351	0.134262	26.9261	0.003	-0.003	0.125668	0.0261328	0.0852962	0.1816	0.0500678	26.7786	0.195081	0.0988495	4.55736	0	0.0273419
2024	PMC	Chăm sóc sức khỏe	0.0047	0.5804	0.4344	-0.653192	0.653192	0.1998	0.2533	2.81188	0.0164522	0.0261328	0.126605	0.191632	0.195081	26.7786	0.152	-0.152	0.088795	0.0304864	0.0803819	0.1998	0.0293217	26.6524	0.229426	0.0911901	3.89013	0	0.026791
2020	PMP	Nguyên vật liệu	0.0059	0.8334	0	-0.131823	0.131823	0.0267	0.0973	0.993557	0.0266159	0.212768	0.110402	0.110402	0.734051	26.2154	0.261	-0.261	-0.0239016	0.212768	0.283926	0.0267	0.110402	26.2154	0.734051	0.257203	1.01487	1	0.131344
2021	PMP	Nguyên vật liệu	0.0059	0.8334	0	-0.222768	0.222768	0.027	0.1029	0.942003	0.0322373	0.212768	0.0682927	0.110402	0.734051	26.2154	0.079	0.079	-0.0125927	0.778234	0.261086	0.027	0.0179163	26.2647	0.741096	0.248521	1.02845	0	0.468757
2022	PMP	Nguyên vật liệu	0	0.8334	0	-0.159765	0.159765	0.0289	0.1069	0.949462	0.053306	0.778234	-0.0591609	0.0682927	0.741096	26.2647	0.022	0.022	0.0216609	-0.165608	0.236194	0.0289	-0.0151549	26.202	0.718019	0.25148	1.03546	0	-0.0713493
2023	PMP	Nguyên vật liệu	0	0.8334	0	-0.304328	0.304328	0.0306	0.1071	0.949501	0.0297152	-0.165608	0.133456	-0.0591609	0.718019	26.202	0.113	-0.113	-0.0773564	-0.0488132	0.242926	0.0306	0.0323183	26.1968	0.711558	0.244198	1.04696	0	-0.0212695
2024	PMP	Nguyên vật liệu	0	0.8334	0.4334	-0.284052	0.284052	0.0309	0.1065	0.942616	0.0273501	-0.0488132	0.0396252	0.133456	0.711558	26.1968	0.097	0.097	-0.0132252	0.318181	0.238256	0.0309	0.00988043	26.213	0.708511	0.234413	1.06098	0	0.140917
2020	PMS	Năng lượng	0.0133	0.5729	0	-0.208922	0.208922	0.0667	0.1354	1.01111	0.00490199	-0.533007	0.0333687	0.0333687	0.505807	26.4928	0.172	0.172	0.0734313	-0.533007	0.244663	0.0667	0.0333687	26.4928	0.505807	0.240493	1.107	0	-0.155054
2021	PMS	Năng lượng	0.0415	0.5729	0	-0.088119	0.088119	0.0751	0.1505	0.970656	0.00549927	-0.533007	0.101702	0.0333687	0.505807	26.4928	0.039	-0.039	-0.0517019	0.00487217	0.216367	0.0751	0.025644	26.5063	0.496582	0.213477	1.17239	0	0.00170651
2022	PMS	Năng lượng	0.0452	0.5729	0	-0.24257	0.24257	0.0731	0.146	1.07849	0.0141864	0.00487217	0.0337359	0.101702	0.496582	26.5063	0.108	-0.108	-0.0107359	2.01503	0.198082	0.0731	0.00849069	26.5325	0.501746	0.192964	1.25134	0	0.714117
2023	PMS	Năng lượng	0.0452	0.5746	0	-0.168798	0.168798	0.0783	0.1752	1.13514	0.00802595	2.01503	0.028304	0.0337359	0.501746	26.5325	0.23	0.230	0.013896	-0.446259	0.170675	0.0783	0.0071686	26.7669	0.593189	0.135002	1.21545	0	-0.094711
2024	PMS	Năng lượng	0.0452	0.5728	0	-0.399547	0.399547	0.0838	0.1817	1.16928	0.0161013	-0.446259	0.156017	0.028304	0.593189	26.7669	0.146	0.146	-0.143717	-0.0855379	0.132147	0.0838	0.0435561	26.5165	0.469025	0.169751	1.32902	0	-0.0253522
2020	POT	Công nghệ thông tin	0.092	0.7487	0.4999	-0.119363	0.119363	0.0082	0.0554	1.01583	0.0195868	-0.0491376	0.0510553	0.0510553	0.843455	28.3713	0.039	-0.039	0.00314471	-0.0491376	0.172117	0.0082	0.0510553	28.3713	0.843455	0.188457	0.98741	0	-0.0946716
2021	POT	Công nghệ thông tin	0.0915	0.7487	0.4999	-0.0217985	0.0217985	0.006	0.0404	1.02528	0.000722979	-0.0491376	-0.00452334	0.0510553	0.843455	28.3713	0.007	0.007	0.0260233	0.0220911	0.174391	0.006	-0.00107959	28.4697	0.858136	0.158052	1.05544	0	0.0429366
2022	POT	Công nghệ thông tin	0.0143	0.7357	0.4999	0.0120713	0.0120713	0.0064	0.0464	1.0106	0.00423544	0.0220911	-0.0448676	-0.00452334	0.858136	28.4697	0.084	0.084	0.0864676	0.153982	0.145507	0.0064	-0.0117682	28.5362	0.869133	0.136149	1.04045	0	0.316625
2023	POT	Công nghệ thông tin	0.0143	0.7357	0.4999	0.00382038	0.00382038	0.0011	0.0082	0.996591	0.00329931	0.153982	-0.00373164	-0.0448676	0.869133	28.5362	0.029	-0.029	0.0287316	-0.130842	0.123537	0.0011	-0.000963904	28.4559	0.86374	0.133862	1.06235	0	-0.218387
2024	POT	Công nghệ thông tin	0.1345	0.7358	0.5	-0.00166177	0.00166177	0.0014	0.0109	0.996255	0.0570713	-0.130842	-0.00530755	-0.00373164	0.86374	28.4559	0.046	0.046	0.0146076	0.201902	0.109037	0.0014	-0.00127366	28.5631	0.87921	0.0979488	1.11291	0	0.397898
2020	PPP	Chăm sóc sức khỏe	0.6461	0.5953	0	-0.297741	0.297741	0.0645	0.0914	1.27211	0.00726747	-0.216462	0.0595499	0.0595499	0.25621	25.6976	0.052	-0.052	0.00115011	-0.216462	0.559331	0.0645	0.0595499	25.6976	0.25621	0.610701	1.76131	0	-0.226251
2021	PPP	Chăm sóc sức khỏe	0.6048	0.5953	0	-0.475039	0.475039	0.1121	0.1504	1.01985	0.00794362	-0.216462	0.174713	0.0595499	0.25621	25.6976	0.024	-0.024	-0.133313	0.113144	0.575938	0.1121	0.0417607	25.7733	0.252815	0.533965	1.80449	0	0.139985
2022	PPP	Chăm sóc sức khỏe	0.6048	0.5953	0	-0.518958	0.518958	0.1307	0.1704	1.1027	0.00524761	0.113144	0.134181	0.174713	0.252815	25.7733	0.134	-0.134	-0.0771809	0.110784	0.499316	0.1307	0.0348138	25.7871	0.21266	0.492485	2.3483	0	0.129685
2023	PPP	Chăm sóc sức khỏe	0.6048	0.5953	0	-0.494522	0.494522	0.1263	0.1577	1.09817	0.0292106	0.110784	0.139386	0.134181	0.21266	25.7871	0.16	-0.160	-0.102686	0.0100952	0.49314	0.1263	0.0350864	25.7986	0.185296	0.487507	2.70655	0	0.010606
2024	PPP	Chăm sóc sức khỏe	0.6048	0.6464	0	-0.381054	0.381054	0.1061	0.1307	1.12206	0.0119614	0.0100952	0.108338	0.139386	0.185296	25.7986	0.081	-0.081	-0.0750376	-0.0913879	0.464232	0.1061	0.02724	25.8421	0.190162	0.444456	2.88995	0	-0.0961023
2020	PPY	Năng lượng	0.0003	0.8843	0.6713	0.0304553	0.0304553	0.044	0.0753	1.05755	0.0238203	-2.73606	0.0325218	0.0325218	0.412916	26.1278	0.001	0.001	-0.00492176	-2.73606	0.358415	0.044	0.0325218	26.1278	0.412916	0.3578	1.26003	0	-0.291954
2021	PPY	Năng lượng	0.0004	0.8789	0.6713	-0.353252	0.353252	0.0698	0.1257	0.73416	0.05391	-2.73606	-0.00824885	0.0325218	0.412916	26.1278	0.006	0.006	0.0184489	2.50481	0.378111	0.0698	-0.00206398	26.2855	0.471691	0.32294	1.34674	0	0.378135
2022	PPY	Năng lượng	0.0003	0.8219	0.6713	-0.479924	0.479924	0.0876	0.1661	0.743632	0.0910054	2.50481	0.153213	-0.00824885	0.471691	26.2855	0.017	0.017	-0.145413	8.4767	0.350019	0.0876	0.0413176	26.4431	0.473919	0.298979	1.23001	0	1.08719
2023	PPY	Năng lượng	0.0003	0.8219	0.6713	0.398777	0.398777	0.0303	0.0672	0.819608	0.157496	8.4767	0.121634	0.153213	0.473919	26.4431	0.082	0.082	-0.112434	0.582418	0.307651	0.0303	0.0327999	26.7069	0.607715	0.236326	1.03893	0	0.0418988
2024	PPY	Năng lượng	0.0001	0.8219	0.6713	0.0527712	0.0527712	0.0307	0.0733	0.803394	0.0454445	0.582418	0.0239304	0.121634	0.607715	26.7069	0.036	0.036	-0.0137304	0.111728	0.329622	0.0307	0.00676703	26.5872	0.551296	0.371526	1.0713	0	0.0100427
2020	PRC	Công nghiệp	0.6006	0.5706	0	0.0390268	0.0390268	0.0061	0.0132	0.85283	0.00093739	-0.333794	0.0574702	0.0574702	0.532509	24.8166	0.031	-0.031	-0.0115702	-0.333794	0.425083	0.0061	0.0574702	24.8166	0.532509	0.446365	0.885308	0	-0.193428
2021	PRC	Công nghiệp	0.6131	0.5706	0	0.0598727	0.0598727	0.0223	0.0469	1.21448	-0.0229017	-0.333794	0.0188426	0.0574702	0.532509	24.8166	0.011	0.011	0.0147574	-0.016819	0.455032	0.0223	0.0045956	24.8096	0.51689	0.458251	0.99324	0	-0.0115075
2022	PRC	Công nghiệp	0.6131	0.5705	0	0.0331212	0.0331212	0.6031	0.9391	0.574636	-1.20669	-0.016819	0.0163491	0.0188426	0.51689	24.8096	0.078	0.078	0.0236509	0.349436	0.191132	0.6031	0.00407287	25.3847	0.268365	0.107535	3.89718	0	0.240167
2023	PRC	Công nghiệp	0.5705	0.5956	0	0.183619	0.183619	0.0014	0.002	0.789192	0.0118867	0.349436	-0.136086	0.0163491	0.268365	25.3847	0.23	0.230	0.182386	-0.061419	0.0947307	0.0014	-0.0435442	24.7645	0.386347	0.176138	2.19074	0	-0.0604998
2024	PRC	Công nghiệp	0.5955	0.5878	0	-0.216124	0.216124	0.036	0.056	0.769593	-0.202586	-0.061419	0.178235	-0.136086	0.386347	24.7645	0.037	0.037	-0.103135	0.517557	0.23826	0.036	0.0311669	24.6901	0.324278	0.256661	1.78174	0	0.291844
2020	PSC	Năng lượng	0.0806	0.7797	0	-0.204792	0.204792	0.0415	0.0946	0.929759	0.0642369	-0.440708	0.124285	0.124285	0.565883	26.3824	0.286	-0.286	-0.0833853	-0.440708	0.683898	0.0415	0.124285	26.3824	0.565883	0.681699	0.605221	0	-0.230359
2021	PSC	Năng lượng	0.0806	0.7797	0	-0.161488	0.161488	0.0288	0.0641	0.923853	0.026814	-0.440708	0.0854601	0.124285	0.565883	26.3824	0.242	-0.242	-0.0679601	0.0530876	0.592117	0.0288	0.0213994	26.2809	0.534962	0.655422	0.649104	0	0.0361709
2022	PSC	Năng lượng	0.0806	0.758	0	-0.361484	0.361484	0.0222	0.047	0.867331	0.0114195	0.0530876	0.100376	0.0854601	0.534962	26.2809	0.232	0.232	-0.0953761	1.3294	0.566609	0.0222	0.0238207	26.2279	0.518805	0.597409	0.682673	0	0.789725
2023	PSC	Năng lượng	0.0806	0.758	0	-0.320665	0.320665	0.0325	0.0656	0.82503	0.0767793	1.3294	0.134759	0.100376	0.518805	26.2279	0.188	-0.188	-0.121959	-0.178903	0.568595	0.0325	0.0327983	26.1875	0.489568	0.592059	0.717806	0	-0.0563201
2024	PSC	Năng lượng	0.0811	0.758	0.5273	-0.365585	0.365585	0.0043	0.0085	0.847625	0.0985024	-0.178903	0.121742	0.134759	0.489568	26.1875	0.038	-0.038	-0.0588422	-0.0772219	0.600687	0.0043	0.0298202	26.1236	0.486779	0.640319	0.559446	0	-0.02474
2020	PSD	Tiêu dùng không thiết yếu	0.0112	0.8866	0	-0.462452	0.462452	0.0256	0.1679	1.238	-0.000398403	1.29993	0.213936	0.213936	0.85517	28.515	0.112	-0.112	-0.151836	1.29993	0.00087364	0.0256	0.213936	28.515	0.85517	0.000704987	1.1616	1	0.445535
2021	PSD	Tiêu dùng không thiết yếu	0.016	0.7997	0	-0.0601387	0.0601387	0.0573	0.3664	1.03551	-0.00303598	1.29993	0.164897	0.213936	0.85517	28.515	0.022	0.022	-0.102597	0.147758	0.0290777	0.0573	0.0456283	28.5814	0.833852	0.0272096	1.16139	1	0.0434146
2022	PSD	Tiêu dùng không thiết yếu	0.0032	0.7997	0	0.828279	0.828279	0.0374	0.2366	1.01032	0.00299731	0.147758	-0.4298	0.164897	0.833852	28.5814	0.036	-0.036	0.4963	0.0151644	0.0293332	0.0374	-0.111016	28.8638	0.851043	0.0221151	1.14561	1	0.00456344
2023	PSD	Tiêu dùng không thiết yếu	0.0024	0.8497	0	-0.178257	0.178257	0.019	0.1174	1.04058	0.000552907	0.0151644	0.112195	-0.4298	0.851043	28.8638	0.06	0.060	-0.0585951	-0.545107	0.021298	0.019	0.031984	28.7679	0.824415	0.0234433	1.18293	1	-0.216591
2024	PSD	Tiêu dùng không thiết yếu	0.017	0.7693	0.7693	-0.195315	0.195315	0.028	0.1471	1.03867	0.000121357	-0.545107	0.116078	0.112195	0.824415	28.7679	0	0.000	-0.0732782	-0.341238	0.0210094	0.028	0.0276281	28.6572	0.7935	0.0234672	1.23192	1	-0.157235
2020	PSE	Nguyên vật liệu	0.0016	0.75	0	0.219622	0.219622	0.0453	0.0724	1.12994	0.000237681	-0.369968	-0.0141501	-0.0141501	0.382057	26.2476	0.014	-0.014	0.0837501	-0.369968	0.0839174	0.0453	-0.0141501	26.2476	0.382057	0.0823543	2.38511	1	-0.0473063
2021	PSE	Nguyên vật liệu	0.0016	0.75	0	0.425282	0.425282	0.1946	0.325	0.901274	0.000434368	-0.369968	0.0897645	-0.0141501	0.382057	26.2476	0.106	-0.106	-0.0325645	5.05687	0.0763935	0.1946	0.0226521	26.5051	0.41571	0.0590461	2.2516	1	0.69159
2022	PSE	Nguyên vật liệu	0.0018	0.75	0	0.268361	0.268361	0.0667	0.1168	0.843843	0.00313211	5.05687	-0.0621128	0.0897645	0.41571	26.5051	0.063	0.063	0.103613	1.99867	0.057409	0.0667	-0.0175171	26.4735	0.44211	0.0592542	2.12472	1	0.209063
2023	PSE	Nguyên vật liệu	0	0.75	0	0.524389	0.524389	0.0406	0.0707	0.853343	0.00408382	1.99867	-0.00867154	-0.0621128	0.44211	26.4735	0.01	-0.010	0.0684715	-1.94809	0.0599261	0.0406	-0.00213359	26.3622	0.408742	0.066984	2.26476	1	-0.163289
2024	PSE	Nguyên vật liệu	0	0.75	0.75	0.769694	0.769694	0.0721	0.1122	0.804964	0.00170762	-1.94809	0.131441	-0.00867154	0.408742	26.3622	0.107	0.107	-0.0658409	0.0292911	0.064294	0.0721	0.0310328	26.2199	0.297504	0.0741254	3.07492	1	0.00262514
2020	PSW	Nguyên vật liệu	0.0007	0.75	0	-0.102097	0.102097	0.0348	0.0425	1.3176	-0.00596905	-0.0550756	0.299359	0.299359	0.180595	26.2007	0.123	0.123	-0.228559	-0.0550756	0.0879948	0.0348	0.299359	26.2007	0.180595	0.0888542	5.02487	1	-0.0074363
2021	PSW	Nguyên vật liệu	0.0006	0.75	0	0.063468	0.063468	0.1924	0.2658	0.72107	0.000823985	-0.0550756	0.122625	0.299359	0.180595	26.2007	0.049	0.049	-0.113825	3.71791	0.0858122	0.1924	0.0305073	26.6007	0.340021	0.057517	2.76292	1	0.500861
2022	PSW	Nguyên vật liệu	0.0006	0.75	0	0.740833	0.740833	0.0348	0.0496	0.715401	0.00289591	3.71791	-0.102989	0.122625	0.340021	26.6007	0.025	0.025	0.134589	2.33674	0.0563632	0.0348	-0.03083	26.3782	0.245334	0.0704107	3.7782	1	0.312925
2023	PSW	Nguyên vật liệu	0.0006	0.75	0	0.676273	0.676273	0.0072	0.0099	0.792241	0	2.33674	-0.0221666	-0.102989	0.245334	26.3782	0.036	-0.036	0.0352666	-0.846089	0.0646464	0.0072	-0.0049276	26.3749	0.290758	0.0648617	3.21013	1	-0.0690818
2024	PSW	Nguyên vật liệu	0.001	0.75	0.75	0.488988	0.488988	0.0353	0.0469	0.76821	0.000804356	-0.846089	0.0809722	-0.0221666	0.290758	26.3749	0.063	-0.063	-0.0749722	-1.92799	0.0610765	0.0353	0.0202094	26.2495	0.19972	0.0692373	4.65352	1	-0.168537
2020	PTD	Công nghiệp	0.4638	0.5105	0	0.0493181	0.0493181	0.0181	0.0802	0.934475	0.0010902	-1.19526	-0.0445418	-0.0445418	0.690212	26.004	0.166	-0.166	0.0521418	-1.19526	0.016485	0.0181	-0.0445418	26.004	0.690212	0.0266901	1.00077	0	-0.523016
2021	PTD	Công nghiệp	0.3638	0.4375	0	-0.359191	0.359191	0.0289	0.0947	1.03734	-0.00151882	-1.19526	0.276472	-0.0445418	0.690212	26.004	0.091	0.091	-0.268872	-0.605578	0.0106694	0.0289	0.0527809	25.9733	0.686415	0.0110013	1.04585	0	-0.343128
2022	PTD	Công nghiệp	0.3138	0.4375	0	0.554015	0.554015	0.0016	0.0063	0.891103	0.00125143	-0.605578	-0.378503	0.276472	0.686415	25.9733	0.007	0.007	0.385203	0.725868	0.00793731	0.0016	-0.0931767	26.3494	0.798877	0.0054496	1.05177	0	0.60724
2023	PTD	Công nghiệp	0.2956	0.4375	0	-0.198414	0.198414	0.0118	0.0552	0.883771	0.00011669	0.725868	-0.0333799	-0.378503	0.798877	26.3494	0.104	0.104	0.0392799	0.348775	0.00387132	0.0118	-0.00989574	26.2044	0.770488	0.00447551	1.04097	0	0.264409
2024	PTD	Công nghiệp	0.1892	0.5196	0	-0.187182	0.187182	-0.1517	-0.8893	1.10758	0.00284021	0.348775	0.0118614	-0.0333799	0.770488	26.2044	0.005	0.005	0.0603386	-0.886516	0.00314904	-0.1517	0.0027507	26.0393	0.898803	0.00371429	0.940432	0	-0.459776
2020	PTS	Công nghiệp	0.0113	0.51	0.51	-0.187753	0.187753	0.0241	0.0783	0.903989	0.00415608	-0.0790179	0.0834066	0.0834066	0.678987	26.383	0.071	-0.071	-0.0739066	-0.0790179	0.712877	0.0241	0.0834066	26.383	0.678987	0.757171	0.568487	0	-0.0696157
2021	PTS	Công nghiệp	0.013	0.51	0.51	-0.27101	0.27101	0.0412	0.1201	0.841131	0.0198983	-0.0790179	0.129853	0.0834066	0.678987	26.383	0.063	-0.063	-0.0903531	0.0987674	0.667687	0.0412	0.0314851	26.3137	0.633258	0.715557	0.707259	0	0.0880549
2022	PTS	Công nghiệp	0.0094	0.51	0.51	-0.267982	0.267982	0.0346	0.0925	0.785667	0.0288721	0.0987674	0.11061	0.129853	0.633258	26.3137	0.092	-0.092	0.13489	0.352543	0.677508	0.0346	0.0266956	26.3028	0.619649	0.684927	0.681201	0	0.269544
2023	PTS	Công nghiệp	0.0105	0.51	0.51	-0.128521	0.128521	0.0014	0.0039	0.794296	0.0416306	0.352543	0.0836269	0.11061	0.619649	26.3028	0.123	-0.123	0.190073	-0.192287	0.593824	0.0014	0.0207929	26.2758	0.630213	0.61007	0.56283	0	-0.114549
2024	PTS	Công nghiệp	0.0109	0.51	0	-0.154684	0.154684	0.0158	0.0396	0.752763	0.135234	-0.192287	0.073394	0.0836269	0.630213	26.2758	0.232	0.232	0.097006	-0.0459698	0.607885	0.0158	0.0181009	26.1412	0.567511	0.695456	0.535368	0	-0.0301041
2020	PTX	Năng lượng	0.0394	0.51	0	-0.684634	0.684634	0.0218	0.068	0.665894	0.0879475	-1.31335	0.509174	0.509174	0.657958	26.1217	0.163	-0.163	-0.449774	-1.31335	0.613725	0.0218	0.509174	26.1217	0.657958	0.70514	0.336485	0	-0.26388
2021	PTX	Năng lượng	0.0382	0.51	0	-0.264128	0.264128	0.0441	0.1171	0.599823	0.0514824	-1.31335	-0.100996	0.509174	0.657958	26.1217	0.105	0.105	0.169096	1.34043	0.606446	0.0441	-0.0234989	25.9825	0.584621	0.697038	0.414437	0	0.318433
2022	PTX	Năng lượng	0.0442	0.51	0	-1.03612	1.03612	0.0523	0.1259	0.630589	0.0756589	1.34043	0.45836	-0.100996	0.584621	25.9825	0.004	0.004	-0.41116	4.93913	0.628294	0.0523	0.106626	26.0206	0.583764	0.604793	0.5883	0	0.774289
2023	PTX	Năng lượng	0.0659	0.51	0	-0.112363	0.112363	0.0598	0.1408	1.0923	0.0760661	4.93913	-0.131555	0.45836	0.583764	26.0206	0.341	-0.341	0.156755	-0.412165	0.644055	0.0598	-0.0335155	26.1094	0.567928	0.589372	0.668433	0	-0.0378316
2024	PTX	Năng lượng	0.0524	0.51	0.51	-0.649022	0.649022	0.095	0.1993	1.06236	0.118514	-0.412165	0.217897	-0.131555	0.567928	26.1094	0.015	0.015	-0.171897	-0.873425	0.631331	0.095	0.0568894	25.9932	0.473416	0.709072	0.518388	0	-0.0910526
2020	PVC	Năng lượng	0.0042	0.456	0.456	-0.309515	0.309515	0.0031	0.0074	0.955962	0.00143122	-0.0486339	0.144245	0.144245	0.50781	28.146	0.033	-0.033	-0.140545	-0.0486339	0.104837	0.0031	0.144245	28.146	0.50781	0.111178	1.78061	1	-0.0381071
2021	PVC	Năng lượng	0	0.36	0.36	0.047464	0.047464	0.0043	0.0108	0.966046	0.00266747	-0.0486339	-0.0704523	0.144245	0.50781	28.146	0.132	0.132	0.0745523	0.3475	0.0987488	0.0043	-0.0170961	28.2248	0.557375	0.0912662	1.64648	1	0.266927
2022	PVC	Năng lượng	0	0.36	0.36	0.087773	0.087773	0.0057	0.0163	0.951702	0.0022572	0.3475	-0.0971123	-0.0704523	0.557375	28.2248	0.196	0.196	0.101312	0.0961438	0.0807417	0.0057	-0.0252341	28.44	0.628841	0.065108	1.49797	1	0.0630709
2023	PVC	Năng lượng	0	0.36	0.36	-0.122792	0.122792	0.0087	0.0246	0.92352	0.00657389	0.0961438	0.0437346	-0.0971123	0.628841	28.44	0.035	0.035	0.0226654	0.128065	0.0579147	0.0087	0.0121056	28.5361	0.575362	0.0526084	1.63908	1	0.0980028
2024	PVC	Năng lượng	0.0008	0.36	0.36	-0.0949642	0.0949642	0.0015	0.0032	0.90624	-0.000360924	0.128065	0.103433	0.0437346	0.575362	28.5361	0.056	0.056	-0.0659333	-0.107058	0.028221	0.0015	0.0270998	28.3564	0.497417	0.0337757	1.88038	1	-0.0821409
2020	PVG	Dịch vụ tiện ích	0.0005	0.5131	0	-0.575571	0.575571	0.0004	0.0011	0.95322	0.0136452	-0.0175438	0.278115	0.278115	0.689608	28.0698	0.009	-0.009	-0.363015	-0.0175438	0.268729	0.0004	0.278115	28.0698	0.689608	0.2222	0.974573	1	-0.00646344
2021	PVG	Dịch vụ tiện ích	0.0002	0.5131	0	-0.562317	0.562317	0.0086	0.0299	0.877257	0.000467385	-0.0175438	0.286233	0.278115	0.689608	28.0698	0.014	-0.014	-0.234833	0.400743	0.197205	0.0086	0.0783404	28.2409	0.730476	0.166191	1.03843	1	0.179718
2022	PVG	Dịch vụ tiện ích	0.0001	0.5131	0	-0.0893827	0.0893827	0.0099	0.0328	0.883282	-0.0578515	0.400743	-0.182755	0.286233	0.730476	28.2409	0.001	-0.001	0.233355	0.283659	0.168953	0.0099	-0.049588	28.0072	0.657766	0.213434	1.10597	1	0.127954
2023	PVG	Dịch vụ tiện ích	0.0001	0.5131	0	-0.431046	0.431046	0.0007	0.0022	0.885564	0.0230813	0.283659	0.155847	-0.182755	0.657766	28.0072	0.027	-0.027	-0.0698473	-0.150803	0.19006	0.0007	0.0344296	28.2187	0.731429	0.153831	1.09494	1	-0.0477394
2024	PVG	Dịch vụ tiện ích	0.0001	0.5131	0.5131	-0.257883	0.257883	0.0074	0.0261	0.88632	-0.00393621	-0.150803	-0.0198788	0.155847	0.731429	28.2187	0.026	-0.026	0.0724788	0.452601	0.133802	0.0074	-0.00549326	28.1349	0.700239	0.145491	1.15059	1	0.185898
2020	PVS	Năng lượng	0.0004	0.5138	0.5138	0.0447356	0.0447356	0.0237	0.0512	1.03536	0.0184228	0.129003	-0.0258518	-0.0258518	0.509723	30.8998	0.133	-0.133	0.0610518	0.129003	0.11927	0.0237	-0.0258518	30.8998	0.509723	0.119303	1.6937	1	0.201982
2021	PVS	Năng lượng	0.0004	0.5138	0.5138	0.0159128	0.0159128	0.0264	0.0562	0.94277	0.00911671	0.129003	-0.00525045	-0.0258518	0.509723	30.8998	0.267	0.267	0.0315505	-0.22527	0.113806	0.0264	-0.00131243	30.8447	0.493072	0.12025	1.77117	1	-0.293357
2022	PVS	Năng lượng	0.0003	0.5752	0.5138	-0.123717	0.123717	0.0349	0.0736	1.18228	0.017508	-0.22527	0.0602172	-0.00525045	0.493072	30.8447	0.229	0.229	-0.0602172	0.0846942	0.122566	0.0349	0.0146398	30.8862	0.496421	0.117587	1.79182	1	0.147716
2023	PVS	Năng lượng	0.0003	0.5726	0.5138	0.00481363	0.00481363	0.0392	0.0816	1.10246	0.0344965	0.0846942	-0.0109745	0.0602172	0.496421	30.8862	0.132	0.132	0.0349745	0.115999	0.13082	0.0392	-0.0028005	30.905	0.487272	0.128384	1.79801	1	0.183739
2024	PVS	Năng lượng	0.0005	0.5138	0.5138	-0.172186	0.172186	0.0354	0.0756	1.04295	0.0201052	0.115999	0.164397	-0.0109745	0.487272	30.905	0.158	0.158	-0.120797	0.166426	0.135818	0.0354	0.0414857	31.1596	0.567462	0.105285	1.71341	1	0.226924
2020	QHD	Công nghiệp	0.1641	0.3234	0	-0.417318	0.417318	0.2377	0.3501	2.31756	0.00820481	0.265093	0.142469	0.142469	0.272181	25.6026	0.038	-0.038	-0.0810693	0.265093	0.291078	0.2377	0.142469	25.6026	0.272181	0.274347	2.56936	0	0.137252
2021	QHD	Công nghiệp	0.1641	0.0515	0	-0.215079	0.215079	0.0874	0.1233	1.77107	0.0507125	0.265093	0.080479	0.142469	0.272181	25.6026	0.119	-0.119	-0.015579	0.00872617	0.222767	0.0874	0.0207151	25.6496	0.308535	0.21253	2.33088	0	0.00421498
2022	QHD	Công nghiệp	0.0625	0.0515	0	-0.444505	0.444505	0.1228	0.1852	1.62061	0.0486045	0.00872617	0.219893	0.080479	0.308535	25.6496	0.118	-0.118	-0.120093	0.194928	0.224996	0.1228	0.056266	25.7996	0.361808	0.193654	2.07218	0	0.0982765
2023	QHD	Công nghiệp	0.0625	0.1775	0	-0.336418	0.336418	0.1461	0.219	1.38814	0.0120428	0.194928	0.0872999	0.219893	0.361808	25.7996	0.027	-0.027	-0.00239985	0.0650925	0.20006	0.1461	0.0234589	25.8245	0.304903	0.195147	2.83984	0	0.0347172
2024	QHD	Công nghiệp	0.0625	0.1775	0	-0.246806	0.246806	0.081	0.1179	1.3754	0.0173153	0.0650925	-0.00720421	0.0872999	0.304903	25.8245	0.131	-0.131	0.108304	0.270295	0.175429	0.081	-0.00182344	25.8503	0.3197	0.170969	2.7149	0	0.142833
2020	QST	Dịch vụ viễn thông	0.29	0.3175	0	-0.316024	0.316024	0.0567	0.1374	1.15089	0.139233	0.0669414	0.12959	0.12959	0.551067	25.1175	0.021	0.021	-0.0365897	0.0669414	0.873891	0.0567	0.12959	25.1175	0.551067	0.618696	0.636836	0	0.0356661
2021	QST	Dịch vụ viễn thông	0.2976	0.3269	0	-0.237835	0.237835	0.0731	0.1516	1.14594	0.124118	0.0669414	0.0555017	0.12959	0.551067	25.1175	0.01	-0.010	0.0665983	0.316031	0.632904	0.0731	0.0162478	25.0827	0.483157	0.65528	0.595979	0	0.229641
2022	QST	Dịch vụ viễn thông	0.1957	0.3269	0	-0.373696	0.373696	0.1071	0.2078	1.08871	0.170132	0.316031	0.184063	0.0555017	0.483157	25.0827	0.112	0.112	-0.0632633	0.308873	0.62711	0.1071	0.0452165	25.1774	0.485762	0.570491	0.525251	0	0.176292
2023	QST	Dịch vụ viễn thông	0.2976	0.4289	0	-0.401391	0.401391	0.107	0.2108	1.20612	0.0683595	0.308873	0.0939308	0.184063	0.485762	25.1774	0.131	0.131	-0.00633082	0.278082	0.725046	0.107	0.0245929	25.2656	0.49882	0.66383	0.53792	0	0.148322
2024	QST	Dịch vụ viễn thông	0.3284	0.5455	0	-0.425178	0.425178	0.0983	0.2089	1.14951	0.0824725	0.278082	0.142347	0.0939308	0.49882	25.2656	0.22	0.220	-0.0460469	0.1808	0.649613	0.0983	0.0371552	25.4397	0.555279	0.545768	0.641344	0	0.0917226
2020	SAF	Tiêu dùng thiết yếu	0.1117	0.787	0.513	-0.75777	0.75777	0.2147	0.3219	3.10231	0.0268761	0.0636572	0.260144	0.260144	0.316816	26.1341	0.032	-0.032	-0.258144	0.0636572	0.172791	0.2147	0.260144	26.1341	0.316816	0.163487	2.63339	1	0.012676
2021	SAF	Tiêu dùng thiết yếu	0.1452	0.458	0.317	-1.31241	1.31241	0.2055	0.3122	2.51077	0.0191037	0.0636572	0.535486	0.260144	0.316816	26.1341	0.03	-0.030	-0.532086	-0.540399	0.153324	0.2055	0.137575	26.2729	0.363765	0.133463	2.38088	1	-0.11231
2022	SAF	Tiêu dùng thiết yếu	0.1445	0.8205	0.513	-0.433046	0.433046	0.1943	0.3044	2.76482	0.0162379	-0.540399	0.00984735	0.535486	0.363765	26.2729	0.231	0.231	0.00345265	-0.635166	0.124453	0.1943	0.00263233	26.3399	0.359483	0.116386	2.45736	1	-0.170835
2023	SAF	Tiêu dùng thiết yếu	0.1445	0.8203	0.513	-0.491445	0.491445	0.1922	0.2901	3.39157	0.00233733	-0.635166	0.0406924	0.00984735	0.359483	26.3399	0.054	-0.054	-0.0400924	0.000400464	0.0953661	0.1922	0.0105139	26.2761	0.314031	0.10165	2.85995	0	0.000138905
2024	SAF	Tiêu dùng thiết yếu	0.1452	0.9006	0.513	-0.835422	0.835422	0.1841	0.2675	3.46659	0.0321912	0.000400464	0.201762	0.0406924	0.314031	26.2761	0.02	-0.020	-0.177262	-0.267586	0.0933721	0.1841	0.0488316	26.2805	0.309592	0.0929616	2.9272	0	-0.087065
2020	SDC	Công nghiệp	0.1258	0.712	0.5101	-0.0825262	0.0825262	0.0132	0.0255	0.706732	0.00209328	-0.169425	0.0365112	0.0365112	0.448116	25.2862	0.085	0.085	-0.0151112	-0.169425	0.0553505	0.0132	0.0365112	25.2862	0.448116	0.0624626	1.99743	0	-0.256134
2021	SDC	Công nghiệp	0.1258	0.712	0.5101	-0.179414	0.179414	0.0259	0.0449	0.638794	-0.0170323	-0.169425	0.073678	0.0365112	0.448116	25.2862	0.068	-0.068	-0.071678	-0.0508773	0.055576	0.0259	0.0173076	25.1999	0.392475	0.0605865	2.25584	0	-0.0916265
2022	SDC	Công nghiệp	0.1258	0.712	0.5101	-0.0122805	0.0122805	0.0193	0.0322	0.6524	0.00440245	-0.0508773	-0.0188933	0.073678	0.392475	25.1999	0.124	-0.124	0.0337933	-0.0145709	0.0534788	0.0193	-0.0045196	25.2154	0.406946	0.0526565	2.17178	0	-0.026499
2023	SDC	Công nghiệp	0.1258	0.712	0.5101	-0.111478	0.111478	0.0203	0.0345	0.648466	-0.00105114	-0.0145709	0.00389613	-0.0188933	0.406946	25.2154	0.001	-0.001	0.0121039	0.0613049	0.0432963	0.0203	0.000981579	25.2257	0.414215	0.0428505	2.21097	0	0.116314
2024	SDC	Công nghiệp	0.1289	0.7582	0.5101	-0.264646	0.264646	0.0192	0.0317	0.606584	0.0027904	0.0613049	0.0650588	0.00389613	0.414215	25.2257	0.11	-0.110	-0.0608588	0.226463	0.0758186	0.0192	0.0163489	25.1526	0.373236	0.0815704	2.47912	0	0.388905
2020	SDG	Nguyên vật liệu	0	0.9341	0	-0.394534	0.394534	0.0726	0.2135	0.713528	0.0549225	0.586781	0.0684908	0.0684908	0.468105	27.4541	0.114	-0.114	-0.0517908	0.586781	0.618215	0.0726	0.0684908	27.4541	0.468105	0.463742	1.1214	0	0.285286
2021	SDG	Nguyên vật liệu	0.0301	0.891	0	-0.0247813	0.0247813	0.0224	0.0681	0.718209	0.0532363	0.586781	0.0041054	0.0684908	0.468105	27.4541	0.056	-0.056	0.0341946	-0.367622	0.420459	0.0224	0.00117288	27.5346	0.480373	0.387936	1.21077	0	-0.185383
2022	SDG	Nguyên vật liệu	0.0939	0.9346	0	-0.178576	0.178576	0.036	0.109	0.708444	0.0498269	-0.367622	0.0482447	0.0041054	0.480373	27.5346	0.018	-0.018	-0.0125447	0.221308	0.422355	0.036	0.0125464	27.613	0.500927	0.390515	1.24601	0	0.148483
2023	SDG	Nguyên vật liệu	0.094	0.7758	0	-0.177342	0.177342	0.0194	0.0618	0.732433	0.0122205	0.221308	0.0656764	0.0482447	0.500927	27.613	0.055	-0.055	0.0050236	-0.216166	0.316782	0.0194	0.0170622	27.5904	0.581419	0.324029	1.31379	0	-0.136579
2024	SDG	Nguyên vật liệu	0.094	0.9346	0	-0.130336	0.130336	-0.03	-0.0737	0.79305	0.0241905	-0.216166	0.136736	0.0656764	0.581419	27.5904	0.063	-0.063	-0.105036	-0.26796	0.350664	-0.03	0.0337973	27.429	0.606891	0.4121	1.20658	0	-0.191699
2020	SDN	Nguyên vật liệu	0.159	0.6745	0.3001	-0.796511	0.796511	0.17	0.2885	1.35347	0.00950591	-0.00318324	0.12347	0.12347	0.409929	25.0011	0.258	-0.258	-0.0975697	-0.00318324	0.070719	0.17	0.12347	25.0011	0.409929	0.061909	2.12035	0	-0.00139431
2021	SDN	Nguyên vật liệu	0.159	0.5185	0.2043	-0.470858	0.470858	0.1804	0.2865	1.24162	0.0176889	-0.00318324	0.0988012	0.12347	0.409929	25.0011	0.211	0.211	-0.0697012	-0.341518	0.0535522	0.1804	0.026341	25.005	0.331119	0.0533437	2.68804	0	-0.171116
2022	SDN	Nguyên vật liệu	0.0617	0.3561	0.2043	-0.104083	0.104083	0.1765	0.3	0.812511	-0.134981	-0.341518	-0.433064	0.0988012	0.331119	25.005	0.115	0.115	0.378464	0.131334	0.0320688	0.1765	-0.108477	25.3853	0.46686	0.0219237	1.16539	0	0.0796998
2023	SDN	Nguyên vật liệu	0.0309	0.5127	0.2043	-0.385926	0.385926	0.1561	0.2728	1.22585	0.00126057	0.131334	0.0967126	-0.433064	0.46686	25.3853	0.149	0.149	-0.0956126	-0.172133	0.0138997	0.1561	0.0287212	25.3787	0.388481	0.0139918	1.20024	0	-0.141517
2024	SDN	Nguyên vật liệu	0.0617	0.469	0.2043	-0.405037	0.405037	0.0825	0.1349	1.26261	-0.0101904	-0.172133	0.0370121	0.0967126	0.388481	25.3787	0.041	-0.041	0.0434879	0.0866555	0.0110875	0.0825	0.00922246	25.4177	0.387781	0.0106642	1.25738	0	0.0824399
2020	SDU	Bất động sản	0.2603	0.5499	0.3	0.0284353	0.0284353	0.0001	0.0004	1.03245	0	-0.00440983	-0.0506792	-0.0506792	0.705442	27.802	0.066	0.066	0.0744792	-0.00440983	0.00107647	0.0001	-0.0506792	27.802	0.705442	0.000981249	1.3308	0	-0.0515939
2021	SDU	Bất động sản	0.2603	0.5499	0.3	-0.146664	0.146664	0.0008	0.0026	1.13972	0	-0.00440983	0.0252867	-0.0506792	0.705442	27.802	0.037	-0.037	0.0117133	-0.0284921	0.000713636	0.0008	0.00661422	27.801	0.704383	0.000714373	1.15647	0	-0.385594
2022	SDU	Bất động sản	0.2603	0.5499	0.3	0.0486122	0.0486122	0.001	0.0034	1.01378	0	-0.0284921	-0.0344481	0.0252867	0.704383	27.801	0.128	0.128	0.122148	0.0272531	0.000446483	0.001	-0.00860759	27.8073	0.705252	0.000443679	1.22416	0	0.59968
2023	SDU	Bất động sản	0.2603	0.5499	0.3	-0.00997888	0.00997888	0.0009	0.0029	0.999502	-0.00175298	0.0272531	-0.0162144	-0.0344481	0.705252	27.8073	0.107	0.107	0.0325144	-0.00118677	0.000177471	0.0009	-0.00406636	27.8168	0.707168	0.000175802	1.20148	0	-0.0164276
2024	SDU	Bất động sản	0.2603	0.5499	0.3	-0.0800279	0.0800279	0.0011	0.0036	1.02536	-0.00983389	-0.00118677	0.03517	-0.0162144	0.707168	27.8168	0.173	0.173	-0.04227	-0.00155446	0.000157526	0.0011	0.00883406	27.8036	0.702243	0.000159605	1.18858	0	-0.0220843
2020	SED	Dịch vụ viễn thông	0.0048	0.5047	0.4339	-0.806494	0.806494	0.0943	0.1633	0.955431	0.0685871	0.00583705	0.24055	0.24055	0.388838	26.6986	0.024	0.024	-0.22675	0.00583705	0.0157968	0.0943	0.24055	26.6986	0.388838	0.0162784	2.10368	0	0.00393406
2021	SED	Dịch vụ viễn thông	0.0088	0.4339	0.4339	-0.362315	0.362315	0.0859	0.1531	0.842417	0.00816564	0.00583705	-0.0660469	0.24055	0.388838	26.6986	0.096	0.096	0.0711469	0.206337	0.0134606	0.0859	-0.0162638	26.9318	0.478205	0.0106604	1.69067	0	0.134424
2022	SED	Dịch vụ viễn thông	0.0088	0.4339	0.4339	-0.809713	0.809713	0.0767	0.1414	0.823209	0.0292914	0.206337	0.153857	-0.0660469	0.478205	26.9318	0.024	0.024	-0.151957	0.446763	0.127098	0.0767	0.0429295	26.9205	0.436546	0.128541	1.76871	0	0.32396
2023	SED	Dịch vụ viễn thông	0.0088	0.4339	0.4339	-0.608805	0.608805	0.0804	0.1435	0.844053	-8.51028e-05	0.446763	0.00133551	0.153857	0.436546	26.9205	0.135	-0.135	0.0242645	0.272281	0.11625	0.0804	0.000331993	27.0023	0.442739	0.107123	1.81591	0	0.147453
2024	SED	Dịch vụ viễn thông	0.0088	0.5067	0.4339	-0.956912	0.956912	0.107	0.1933	0.802823	0.0242857	0.272281	0.092741	0.00133551	0.442739	27.0023	0.18	-0.180	-0.033341	0.543967	0.102722	0.107	0.0241325	27.1318	0.449986	0.0902383	1.85489	0	0.278601
2020	SFN	Nguyên vật liệu	0.0943	0.4775	0.4	-0.480898	0.480898	0.2436	0.2643	1.35716	-0.0396903	0.0462951	0.202649	0.202649	0.0742612	24.9156	0.23	-0.230	-0.0602493	0.0462951	0.136169	0.2436	0.202649	24.9156	0.0742612	0.117923	11.8695	0	0.0175974
2021	SFN	Nguyên vật liệu	0.0943	0.5528	0.4	-0.258672	0.258672	0.2539	0.2741	0.930556	0.0175679	0.0462951	0.162105	0.202649	0.0742612	24.9156	0.166	0.166	-0.0780051	-0.209629	0.0778006	0.2539	0.0434364	25.0763	0.0735657	0.0662522	12.6851	0	-0.0904205
2022	SFN	Nguyên vật liệu	0.0947	0.5528	0.4	-0.239201	0.239201	0.11	0.1184	0.688737	0.0603681	-0.209629	0.0793989	0.162105	0.0735657	25.0763	0.227	-0.227	-0.0433989	0.383681	0.0874444	0.11	0.0214411	25.0526	0.0681408	0.0895403	13.3537	0	0.213662
2023	SFN	Nguyên vật liệu	0.095	0.5893	0.4	-0.13167	0.13167	0.1183	0.1279	0.870216	0.0383916	0.383681	0.111879	0.0793989	0.0681408	25.0526	0.043	-0.043	-0.0615789	-0.312365	0.095788	0.1183	0.0276385	25.118	0.0815791	0.089722	11.0959	0	-0.13997
2024	SFN	Nguyên vật liệu	0.0947	0.5842	0.4	-0.330796	0.330796	0.1028	0.1109	0.800068	0.0266874	-0.312365	0.165365	0.111879	0.0815791	25.118	0.1	0.100	-0.134165	-0.0347647	0.0908663	0.1028	0.0426931	25.1469	0.065143	0.0882795	13.9607	0	-0.0193379
2020	SGC	Tiêu dùng thiết yếu	0.2666	0.7097	0.4989	-0.513346	0.513346	0.1593	0.2587	3.44258	0.15893	-0.0429851	0.232059	0.232059	0.435617	26.071	0.054	0.054	-0.205059	-0.0429851	0.402474	0.1593	0.232059	26.071	0.435617	0.339739	1.4425	0	-0.0239082
2021	SGC	Tiêu dùng thiết yếu	0.8158	0.8491	0	-0.457315	0.457315	0.1455	0.2351	3.205	0.133049	-0.0429851	0.0802401	0.232059	0.435617	26.071	0.198	-0.198	-4.01007e-05	0.344089	0.428947	0.1455	0.0217556	26.1451	0.330754	0.3983	1.78223	1	0.232275
2022	SGC	Tiêu dùng thiết yếu	0.8076	0.8491	0	-0.658576	0.658576	0.2386	0.3278	2.17791	0.108985	0.344089	0.239388	0.0802401	0.330754	26.1451	0.007	0.007	-0.233288	0.268659	0.469751	0.2386	0.0620641	26.3264	0.222882	0.391862	2.68942	1	0.158496
2023	SGC	Tiêu dùng thiết yếu	0.8561	0.8491	0	-0.688855	0.688855	0.181	0.2218	3.03435	0.224511	0.268659	0.30372	0.239388	0.222882	26.3264	0.071	0.071	-0.29742	0.0380463	0.437655	0.181	0.0827941	26.4177	0.14835	0.399484	3.44794	1	0.0232257
2024	SGC	Tiêu dùng thiết yếu	0.0445	0.7672	0	-0.959251	0.959251	0.268	0.3344	2.18164	0.0894148	0.0380463	0.336023	0.30372	0.14835	26.4177	0.048	0.048	-0.0844227	0.850726	0.492766	0.268	0.0878361	26.8335	0.231543	0.32511	3.6183	1	0.556043
2020	SGD	Dịch vụ viễn thông	0.0512	0.6955	0.1563	-0.0413641	0.0413641	0.0326	0.0612	0.771761	0.164554	-0.039521	-0.0743861	-0.0743861	0.375603	25.4206	0.121	0.121	0.233686	-0.039521	0.260091	0.0326	-0.0743861	25.4206	0.375603	0.232262	2.23852	0	-0.0228296
2021	SGD	Dịch vụ viễn thông	0.0512	0.6955	0.1563	0.252401	0.252401	0.0152	0.032	1.27612	0.0168142	-0.039521	-0.0808193	-0.0743861	0.375603	25.4206	0.125	0.125	0.312419	-0.145217	0.235816	0.0152	-0.0213469	25.5501	0.47067	0.207169	1.69036	0	-0.0961317
2022	SGD	Dịch vụ viễn thông	0.0512	0.7101	0.1563	-0.233156	0.233156	0.0014	0.003	0.83098	-0.00195996	-0.145217	0.0507052	-0.0808193	0.47067	25.5501	0.156	-0.156	-0.0389052	0.492684	0.104928	0.0014	0.013496	25.3114	0.376498	0.133214	2.01261	0	0.410733
2023	SGD	Dịch vụ viễn thông	0.0512	0.7295	0.1563	0.00663975	0.00663975	0.0172	0.0326	0.908532	-0.00235358	0.492684	-0.0801958	0.0507052	0.376498	25.3114	0.163	-0.163	0.124796	-0.0737107	0.123603	0.0172	-0.0176675	25.1843	0.311213	0.140356	2.40132	0	-0.0343096
2024	SGD	Dịch vụ viễn thông	0.0512	0.7889	0.1563	-0.00577618	0.00577618	-0.0122	-0.0178	0.906604	0.0383398	-0.0737107	0.00514526	-0.0801958	0.311213	25.1843	0.031	-0.031	0.0272547	-0.156709	0.140713	-0.0122	0.00120467	25.1849	0.323214	0.140627	2.17771	0	-0.0665176
2020	SHN	Tiêu dùng không thiết yếu	0	0	0	0.102712	0.102712	0.0008	0.0023	1.12784	0.0411517	-0.0772124	-0.0472767	-0.0472767	0.600064	28.9869	0.052	0.052	0.101977	-0.0772124	0.00888292	0.0008	-0.0472767	28.9869	0.600064	0.0121821	1.22453	0	-0.100989
2021	SHN	Tiêu dùng không thiết yếu	0	0	0	-0.207473	0.207473	0.0091	0.022	0.892958	-0.0883106	-0.0772124	0.180357	-0.0472767	0.600064	28.9869	0.058	0.058	-0.142757	0.02274	0.00371414	0.0091	0.0380273	28.9325	0.568484	0.00392156	1.39493	0	0.0241237
2022	SHN	Tiêu dùng không thiết yếu	0	0	0	0.777653	0.777653	0.0005	0.0016	0.888302	-0.072763	0.02274	-0.576241	0.180357	0.568484	28.9325	0.13	0.130	0.577841	0.5736	0.00379309	0.0005	-0.140147	29.3732	0.722598	0.00244123	1.06541	0	0.562742
2023	SHN	Tiêu dùng không thiết yếu	0	0	0	-0.105498	0.105498	0.0006	0.0021	0.878712	0.00072305	0.5736	0.0352691	-0.576241	0.722598	29.3732	0.125	0.125	-0.0180691	-0.0226244	0.00278213	0.0006	0.0107292	29.373	0.722055	0.00278272	1.0249	0	-0.0220686
2024	SHN	Tiêu dùng không thiết yếu	0	0.1099	0	0.235508	0.235508	0.0015	0.0055	0.872599	-0.00188728	-0.0226244	-0.128876	0.0352691	0.722055	29.373	0.081	0.081	0.165276	-0.333342	0.00426812	0.0015	-0.0322157	29.354	0.715253	0.00434993	1.00638	0	-0.332419
2020	SLS	Tiêu dùng thiết yếu	0.021	0.4243	0	-0.368101	0.368101	0.1168	0.2447	2.00096	0.0103598	-0.0678543	0.239483	0.239483	0.471712	27.6426	0.015	0.015	-0.109383	-0.0678543	0.560175	0.1168	0.239483	27.6426	0.471712	0.625526	1.07501	0	-0.083834
2021	SLS	Tiêu dùng thiết yếu	0.021	0.4243	0	-0.12255	0.12255	0.1794	0.3245	1.47157	0.0199292	-0.0678543	0.094129	0.239483	0.471712	27.6426	0.033	-0.033	-0.086729	0.019061	0.574389	0.1794	0.0222352	27.7381	0.424691	0.52208	1.24809	0	0.0230193
2022	SLS	Tiêu dùng thiết yếu	0.1119	0.5233	0	-0.556455	0.556455	0.2748	0.415	1.57503	0.016389	0.019061	0.246742	0.094129	0.424691	27.7381	0.113	-0.113	-0.237142	0.357682	0.510009	0.2748	0.0646284	27.7586	0.252837	0.499687	2.05486	0	0.464548
2023	SLS	Tiêu dùng thiết yếu	0.1119	0.5233	0	-0.786663	0.786663	0.4067	0.5062	1.39317	0.0445482	0.357682	0.394318	0.246742	0.252837	27.7586	0.281	0.281	-0.386718	0.320787	0.463282	0.4067	0.0995872	27.994	0.152139	0.366108	3.95461	0	0.290353
2024	SLS	Tiêu dùng thiết yếu	0.1119	0.5227	0	-0.118648	0.118648	0.3466	0.3848	1.14795	0.0226965	0.320787	0.0268688	0.394318	0.152139	27.994	0.076	0.076	-0.0216688	-0.144595	0.382304	0.3466	0.00750421	28.1591	0.0831092	0.324115	7.99715	0	-0.128348
2020	SMN	Dịch vụ viễn thông	0.014	0.5312	0.5312	-0.577561	0.577561	0.1011	0.1327	0.89464	0.0114689	-0.228324	0.0955397	0.0955397	0.265302	25.2938	0.074	-0.074	-0.0863397	-0.228324	0.0453221	0.1011	0.0955397	25.2938	0.265302	0.0402545	2.4712	0	-0.0401197
2021	SMN	Dịch vụ viễn thông	0.0094	0.5312	0.5312	-0.485129	0.485129	0.0964	0.1588	0.894231	0.000378537	-0.228324	0.0229709	0.0955397	0.265302	25.2938	0.181	-0.181	0.0249291	-0.0118622	0.0311378	0.0964	0.0060828	25.6803	0.479036	0.0211558	1.62507	0	-0.00244483
2022	SMN	Dịch vụ viễn thông	0.0072	0.5312	0.5312	-0.72121	0.72121	0.0938	0.1561	0.815665	0.00581354	-0.0118622	0.0493993	0.0229709	0.479036	25.6803	0.007	-0.007	-0.0203993	0.230484	0.0211201	0.0938	0.0147072	25.4137	0.29384	0.027573	2.43661	0	0.0700882
2023	SMN	Dịch vụ viễn thông	0.0071	0.5312	0.5312	-0.599551	0.599551	0.0923	0.1227	0.787212	0.000333012	0.230484	-0.048056	0.0493993	0.29384	25.4137	0.037	0.037	0.082956	-0.48154	0.0204295	0.0923	-0.0104219	25.3071	0.197697	0.0227272	3.52359	0	-0.104816
2024	SMN	Dịch vụ viễn thông	0.0055	0.5312	0	-0.677802	0.677802	0.0929	0.1169	0.822013	-0.0247195	-0.48154	0.070072	-0.048056	0.197697	25.3071	0.047	-0.047	-0.068772	0.165901	0.0151015	0.0929	0.0165853	25.3415	0.213296	0.0145909	3.34014	0	0.0362613
2020	SMT	Công nghệ thông tin	0.1225	0.6321	0	-0.899747	0.899747	0.0187	0.0531	0.978514	0.0692018	0.587032	0.444439	0.444439	0.64029	25.9827	0.022	-0.022	-0.410839	0.587032	0.170228	0.0187	0.444439	25.9827	0.64029	0.189002	1.11103	0	0.543212
2021	SMT	Công nghệ thông tin	0.026	0.5121	0	-0.00481487	0.00481487	0.0099	0.0316	0.899233	0.0145182	0.587032	-0.1376	0.444439	0.64029	25.9827	0.008	0.008	0.1713	0.229648	0.274161	0.0099	-0.0326022	26.2579	0.720095	0.208188	1.18674	0	0.124026
2022	SMT	Công nghệ thông tin	0.1472	0.1221	0	0.0764898	0.0764898	0.0026	0.0079	0.777017	-0.051123	0.229648	-0.149337	-0.1376	0.720095	26.2579	0.087	-0.087	0.159237	-0.237863	0.217862	0.0026	-0.0424407	25.9338	0.609885	0.301262	1.33823	0	-0.150504
2023	SMT	Công nghệ thông tin	0.196	0.7077	0	-0.118321	0.118321	0.0064	0.0152	0.765907	0.0293551	-0.237863	0.0895621	-0.149337	0.609885	25.9338	0.051	-0.051	-0.0811621	-0.88619	0.275324	0.0064	0.0187934	25.7862	0.568738	0.319107	1.39184	0	-0.477336
2024	SMT	Công nghệ thông tin	0.2221	0.305	0	-0.281107	0.281107	0.0087	0.0174	0.675341	0.0184673	-0.88619	0.177825	0.0895621	0.568738	25.7862	0.056	-0.056	-0.158325	-0.501497	0.261075	0.0087	0.0411818	25.491	0.410447	0.350751	1.80153	0	-0.445915
2020	SPC	Nguyên vật liệu	0.0004	0.6621	0	-0.544787	0.544787	0.0582	0.163	1.01228	0.00921956	-0.157831	0.0355726	0.0355726	0.629204	27.1855	0.028	0.028	-0.0736726	-0.157831	0.0637406	0.0582	0.0355726	27.1855	0.629204	0.0607084	1.47637	0	-0.0779948
2021	SPC	Nguyên vật liệu	0.0145	0.6741	0.5933	-0.333468	0.333468	0.0372	0.1019	0.894761	0.00966717	-0.157831	-0.0464509	0.0355726	0.629204	27.1855	0.131	0.131	0.0501509	-0.0416095	0.0610247	0.0372	-0.0118957	27.1172	0.606077	0.0653359	1.54657	0	-0.0234152
2022	SPC	Nguyên vật liệu	0.0145	0.6741	0.5933	-0.481873	0.481873	0.0385	0.1057	0.825992	0.00135512	-0.0416095	-0.0171996	-0.0464509	0.606077	27.1172	0.016	-0.016	-0.0482004	0.150511	0.0560256	0.0385	-0.00415318	27.2004	0.630001	0.0515535	1.49069	0	0.081006
2023	SPC	Nguyên vật liệu	0.0004	0.674	0.5933	-0.728767	0.728767	-0.0567	-0.1716	0.856656	0.004089	0.150511	0.153839	-0.0171996	0.630001	27.2004	0.015	-0.015	-0.363239	-0.236121	0.0485053	-0.0567	0.0400585	26.999	0.678362	0.0593242	1.33047	0	-0.127757
2024	SPC	Nguyên vật liệu	0.0004	0.6741	0.5933	-0.271547	0.271547	-0.0987	-0.3302	0.926299	0.0102004	-0.236121	-0.023695	0.153839	0.678362	26.999	0.027	0.027	0.066495	-0.346774	0.0520316	-0.0987	-0.00532939	26.8356	0.728003	0.0612734	1.21662	0	-0.17588
2020	SRA	Chăm sóc sức khỏe	0.0841	0.0841	0	0.0311657	0.0311657	0.0626	0.0722	0.734907	0.0513288	-0.261513	-0.0986699	-0.0986699	0.206478	26.818	0.009	-0.009	0.16077	-0.261513	0.0652207	0.0626	-0.0986699	26.818	0.206478	0.0555085	1.3725	0	-0.337551
2021	SRA	Chăm sóc sức khỏe	0.1684	0.1683	0	0.0330283	0.0330283	0.1166	0.1293	0.242862	0.143339	-0.261513	-0.0737146	-0.0986699	0.206478	26.818	0.072	0.072	0.0878146	-0.191148	0.00561566	0.1166	-0.0199112	27.1225	0.0129941	0.00414134	45.3913	0	-0.437612
2022	SRA	Chăm sóc sức khỏe	0	0	0	-0.0985975	0.0985975	0.053	0.0546	0.276452	0.0291892	-0.191148	0.047012	-0.0737146	0.0129941	27.1225	0.038	-0.038	0.063588	-0.00273158	0.00173854	0.053	0.0135289	27.1998	0.030427	0.00160929	20.8702	0	-0.0150785
2023	SRA	Chăm sóc sức khỏe	0.0989	0.0608	0	0.179327	0.179327	0.0075	0.0078	0.179871	-0.107309	-0.00273158	-0.141809	0.047012	0.030427	27.1998	0.091	0.091	0.187809	-0.102401	0.00306418	0.0075	-0.0368209	27.2118	0.0353376	0.0030275	17.2927	0	-0.620007
2024	SRA	Chăm sóc sức khỏe	0	0.2616	0	-0.609774	0.609774	0.042	0.0451	0.229432	0.0679808	-0.102401	0.51067	-0.141809	0.0353376	27.2118	0.144	0.144	-0.45927	0.159959	0.0105031	0.042	0.128436	27.3278	0.100734	0.00935239	1.27414	0	2.57962
2020	SSM	Nguyên vật liệu	0.4563	0.5919	0	-0.604487	0.604487	0.0418	0.0994	0.727753	-0.000918593	-0.459298	0.315918	0.315918	0.382804	25.4666	0.11	0.110	-0.307318	-0.459298	0.0887664	0.0418	0.315918	25.4666	0.382804	0.159638	2.16446	0	-0.280673
2021	SSM	Nguyên vật liệu	0.4563	0.5919	0	0.354096	0.354096	-0.0263	-0.0507	0.6904	-0.000435461	-0.459298	-0.170132	0.315918	0.382804	25.4666	0.004	-0.004	0.171532	-0.722537	0.137076	-0.0263	-0.0303981	25.7461	0.556348	0.10366	1.59309	0	-0.341313
2022	SSM	Nguyên vật liệu	0.4563	0.5919	0	-0.102351	0.102351	-0.0731	-0.1472	0.707294	-0.000161911	-0.722537	0.127192	-0.170132	0.556348	25.7461	0.01	0.010	-0.118092	0.0576406	0.0870029	-0.0731	0.0362117	25.3369	0.423644	0.130991	2.00065	0	0.0546629
2023	SSM	Nguyên vật liệu	0.4072	0.5405	0	0.122767	0.122767	0.0122	0.0252	0.76121	0.0964544	0.0576406	-0.0135261	0.127192	0.423644	25.3369	0.001	0.001	0.0567261	-0.310374	0.205234	0.0122	-0.00269917	25.6907	0.585071	0.144067	1.45215	0	-0.185365
2024	SSM	Nguyên vật liệu	0.5629	0.6916	0	-0.291832	0.291832	0.0346	0.0735	0.651897	0.0148226	-0.310374	0.0180479	-0.0135261	0.585071	25.6907	0.15	0.150	0.0117521	1.61503	0.152398	0.0346	0.00530206	25.5018	0.460543	0.184086	1.76359	0	1.68672
2020	STC	Dịch vụ viễn thông	0.0683	0.5916	0.5254	-1.17978	1.17978	0.0956	0.1447	0.942024	0.0217379	0.48838	0.22845	0.22845	0.375636	26.0118	0.031	0.031	-0.18945	0.48838	0.232256	0.0956	0.22845	26.0118	0.375636	0.18682	2.01288	0	0.189845
2021	STC	Dịch vụ viễn thông	0.0683	0.5916	0.5254	-0.359735	0.359735	0.0854	0.1513	0.861263	0.00808751	0.48838	-0.175109	0.22845	0.375636	26.0118	0.03	-0.030	0.216809	0.164243	0.178789	0.0854	-0.0485235	26.2061	0.460839	0.147219	1.75595	0	0.0667085
2022	STC	Dịch vụ viễn thông	0.0683	0.5916	0.5254	-0.711338	0.711338	0.071	0.1293	0.935753	0.00246913	0.164243	0.114006	-0.175109	0.460839	26.2061	0.114	-0.114	-0.0505058	-0.0273138	0.133562	0.071	0.0312615	26.1556	0.415481	0.140483	1.9605	0	-0.0126301
2023	STC	Dịch vụ viễn thông	0.0677	0.5916	0.5254	-0.578873	0.578873	0.0682	0.1129	0.808395	0.00581166	-0.0273138	0.0568572	0.114006	0.415481	26.1556	0.006	-0.006	-0.0221572	-0.045001	0.131947	0.0682	0.0138554	26.0641	0.346886	0.144583	2.32917	0	-0.0200368
2024	STC	Dịch vụ viễn thông	0.0677	0.5916	0.5254	-0.72008	0.72008	0.0677	0.1041	0.802858	0.00914381	-0.045001	0.138319	0.0568572	0.346886	26.0641	0.044	-0.044	-0.100119	-0.0622442	0.135916	0.0677	0.0329996	26.0917	0.353908	0.132217	2.29956	0	-0.0258092
2020	STP	Nguyên vật liệu	0.1474	0.0736	0	-0.280583	0.280583	0.0418	0.0512	0.642102	0.0354518	0.15441	0.144552	0.144552	0.17861	25.88	0.184	0.184	-0.101652	0.15441	0.104975	0.0418	0.144552	25.88	0.17861	0.105867	4.61852	0	0.133072
2021	STP	Nguyên vật liệu	0.1474	0.0736	0	0.0701826	0.0701826	0.0378	0.0464	0.522913	-0.0611709	0.15441	-0.0211009	0.144552	0.17861	25.88	0.084	0.084	0.0893009	0.036293	0.0364881	0.0378	-0.0052529	25.8916	0.193055	0.0360664	4.50005	0	0.0273718
2022	STP	Nguyên vật liệu	0.1474	0.1516	0	-0.200162	0.200162	0.0248	0.032	0.59791	0.0241746	0.036293	0.153547	-0.0211009	0.193055	25.8916	0.042	-0.042	-0.106847	0.117234	0.0426954	0.0248	0.0386099	25.9576	0.254803	0.0399692	3.36167	0	0.087067
2023	STP	Nguyên vật liệu	0.1474	0.1516	0	-0.122098	0.122098	0.0548	0.0713	0.634366	0.0282947	0.117234	0.0247579	0.153547	0.254803	25.9576	0.061	0.061	0.0267421	-0.224494	0.0605584	0.0548	0.0063936	25.9227	0.208029	0.0627072	4.00259	0	-0.163834
2024	STP	Nguyên vật liệu	0.1474	0.1516	0	0.0114546	0.0114546	0.0345	0.0433	0.659034	0.00644586	-0.224494	-0.0454372	0.0247579	0.208029	25.9227	0.076	0.076	0.0917372	-0.101707	0.0397585	0.0345	-0.0111613	25.8952	0.199339	0.0408673	3.9989	0	-0.0857262
2020	TDT	Tiêu dùng không thiết yếu	0.2662	0.2438	0	0.0068468	0.0068468	0.0427	0.0967	1.004	0.103483	-0.276309	-0.0990091	-0.0990091	0.569433	26.7015	0.018	-0.018	0.110509	-0.276309	0.324664	0.0427	-0.0990091	26.7015	0.569433	0.280328	1.21153	0	-0.25801
2021	TDT	Tiêu dùng không thiết yếu	0.2001	0.2436	0	-0.213224	0.213224	0.0413	0.0915	0.855007	0.0666918	-0.276309	-0.0101709	-0.0990091	0.569433	26.7015	0.017	-0.017	0.0271709	0.349857	0.327694	0.0413	-0.00272908	26.9722	0.533372	0.249986	1.3506	0	0.509919
2022	TDT	Tiêu dùng không thiết yếu	0.25	0.2201	0	-0.246802	0.246802	0.0368	0.0741	0.816768	0.037199	0.349857	0.0630486	-0.0101709	0.533372	26.9722	0.044	0.044	0.00315144	-0.0083163	0.368632	0.0368	0.0178824	26.9199	0.471272	0.388421	1.44719	0	-0.010523
2023	TDT	Tiêu dùng không thiết yếu	0.25	0.2201	0	-0.0521061	0.0521061	0.0241	0.0495	0.836993	0.0344631	-0.0083163	-0.123521	0.0630486	0.471272	26.9199	0.025	0.025	0.197421	0.167702	0.349574	0.0241	-0.030073	27.0955	0.547138	0.293276	1.3821	0	0.203532
2024	TDT	Tiêu dùng không thiết yếu	0.2542	0.2201	0	-0.317821	0.317821	0.0246	0.0543	0.82904	0.0532989	0.167702	0.0686871	-0.123521	0.547138	27.0955	0.33	-0.330	0.0197129	0.130093	0.261261	0.0246	0.0186756	27.1452	0.545474	0.24859	1.42834	0	0.15637
2020	TFC	Tiêu dùng thiết yếu	0.6604	0.6273	0	-0.179832	0.179832	0.0378	0.0933	0.893393	0.00639253	0.246443	0.0407504	0.0407504	0.613318	27.0809	0.084	0.084	0.13725	0.246443	0.0503446	0.0378	0.0407504	27.0809	0.613318	0.0425145	1.30831	0	0.222868
2021	TFC	Tiêu dùng thiết yếu	0.7137	0.6273	0	0.111608	0.111608	-0.0477	-0.139	0.87836	0.00585528	0.246443	-0.0660776	0.0407504	0.613318	27.0809	0.146	0.146	0.139278	0.0222452	0.0487885	-0.0477	-0.0179124	27.1035	0.70152	0.0476985	1.10878	0	0.0194806
2022	TFC	Tiêu dùng thiết yếu	0.6016	0.6273	0	-0.161601	0.161601	0.0447	0.1522	0.889242	0.00445431	0.0222452	-0.0348335	-0.0660776	0.70152	27.1035	0.346	-0.346	0.270833	0.302599	0.0533003	0.0447	-0.00880675	27.2936	0.712365	0.0440709	1.08458	0	0.265869
2023	TFC	Tiêu dùng thiết yếu	0.5585	0.6806	0	-0.241304	0.241304	0.0749	0.2302	1.80178	0.00536232	0.302599	0.0752995	-0.0348335	0.712365	27.2936	0.129	-0.129	0.255201	-0.0950313	0.0476483	0.0749	0.0206092	27.2498	0.636344	0.0497811	1.16145	0	-0.079773
2024	TFC	Tiêu dùng thiết yếu	0.5585	0.7501	0	-0.594384	0.594384	0.2023	0.5079	1.44701	0.00960122	-0.0950313	0.250388	0.0752995	0.636344	27.2498	0.011	0.011	0.0566121	0.178376	0.0532884	0.2023	0.0612267	27.5408	0.575774	0.0398361	1.35731	0	0.155745
2020	THB	Tiêu dùng thiết yếu	0.0653	0.6113	0.55	-1.10992	1.10992	0.0103	0.0208	1.0797	0.0304988	0.813365	0.207726	0.207726	0.513362	26.4356	0.206	-0.206	-0.147726	0.813365	0.225928	0.0103	0.207726	26.4356	0.513362	0.220136	1.44273	0	0.205477
2021	THB	Tiêu dùng thiết yếu	0.0741	0.663	0.55	-0.753819	0.753819	0.0184	0.0378	0.99724	0.00127558	0.813365	0.110399	0.207726	0.513362	26.4356	0.338	-0.338	-0.0455988	-0.358263	0.155747	0.0184	0.0279581	26.4535	0.515088	0.152994	1.63214	0	-0.0770551
2022	THB	Tiêu dùng thiết yếu	0.0741	0.6805	0.55	-0.636697	0.636697	0.0321	0.0659	0.921337	0.0690308	-0.358263	-0.0868974	0.110399	0.515088	26.4535	0.678	0.678	0.159397	1.01268	0.181875	0.0321	-0.0219181	26.4708	0.509415	0.178759	1.62653	0	0.240237
2023	THB	Tiêu dùng thiết yếu	0.0741	0.6805	0.55	-0.444748	0.444748	0.016	0.0334	0.945115	0.0268702	1.01268	0.0744075	-0.0868974	0.509415	26.4708	0.178	-0.178	-0.0307075	-0.340215	0.169844	0.016	0.0187626	26.4842	0.531521	0.167568	1.57769	0	-0.0662099
2024	THB	Tiêu dùng thiết yếu	0.0729	0.6805	0.55	-0.496998	0.496998	0.0128	0.0257	0.942161	0.0275656	-0.340215	0.0604949	0.0744075	0.531521	26.4842	0.124	-0.124	0.00980514	0.380306	0.145916	0.0128	0.0152257	26.3581	0.472952	0.165536	1.80733	0	0.0803366
2020	THS	Tiêu dùng không thiết yếu	0.3412	0.3071	0	0.112813	0.112813	0.044	0.0829	1.14142	0.0304357	-0.343913	0.0220973	0.0220973	0.497708	25.0657	0.003	-0.003	0.00930274	-0.343913	0.205761	0.044	0.0220973	25.0657	0.497708	0.181582	1.3194	0	-0.0814965
2021	THS	Tiêu dùng không thiết yếu	0.4331	0.5414	0	0.0252056	0.0252056	0.0501	0.0965	1.28732	0.00517824	-0.343913	-0.0619237	0.0220973	0.497708	25.0657	0.018	-0.018	0.0941237	0.200028	0.16263	0.0501	-0.0164473	25.0273	0.464355	0.168996	1.44934	0	0.0584775
2022	THS	Tiêu dùng không thiết yếu	0.7903	0.8254	0	-0.0365487	0.0365487	0.0472	0.0857	0.856534	0.0327419	0.200028	0.0427516	-0.0619237	0.464355	25.0273	0.238	-0.238	-0.0330516	-0.346043	0.171003	0.0472	0.0104828	24.9854	0.433781	0.178323	1.53039	0	-0.0919758
2023	THS	Tiêu dùng không thiết yếu	0.7903	0.8709	0	0.144221	0.144221	0.0322	0.0586	0.807454	0.0164497	-0.346043	-0.0872881	0.0427516	0.433781	24.9854	0.019	0.019	0.125788	-0.369056	0.159968	0.0322	-0.0213648	25.0504	0.466761	0.149903	1.46243	0	-0.103594
2024	THS	Tiêu dùng không thiết yếu	0.7913	0.9081	0	0.465153	0.465153	0.0112	0.0273	0.865192	-0.0136206	-0.369056	-0.343898	-0.0872881	0.466761	25.0504	0.103	-0.103	0.444998	0.54927	0.117942	0.0112	-0.0887671	25.5054	0.670644	0.0748324	1.14538	0	0.183547
2020	THT	Năng lượng	0	0.65	0.65	0.0230419	0.0230419	0.0228	0.1016	0.977279	0.329776	0.302828	-0.0132837	-0.0132837	0.799387	28.2086	0.029	-0.029	0.0996837	0.302828	0.562066	0.0228	-0.0132837	28.2086	0.799387	0.445661	1.18764	0	0.174717
2021	THT	Năng lượng	0	0.65	0.65	-0.405778	0.405778	0.0236	0.1154	0.920766	0.241127	0.302828	0.421648	-0.0132837	0.799387	28.2086	0.187	0.187	-0.343748	0.401736	0.520299	0.0236	0.117588	28.1626	0.790813	0.544789	0.804818	0	0.248845
2022	THT	Năng lượng	0	0.65	0.65	-0.195848	0.195848	0.0419	0.1933	0.978387	0.0814607	0.401736	0.221987	0.421648	0.790813	28.1626	0.019	0.019	-0.160987	0.557121	0.348009	0.0419	0.0542207	28.0827	0.775064	0.376956	0.815916	0	0.263909
2023	THT	Năng lượng	0	0.65	0.65	-0.157525	0.157525	0.0448	0.1886	0.94035	0.26191	0.557121	0.267079	0.221987	0.775064	28.0827	0.165	-0.165	-0.218579	-0.124646	0.469606	0.0448	0.0641037	28.1084	0.749818	0.457667	0.727775	0	-0.0431286
2024	THT	Năng lượng	0	0.65	0.65	0.0434279	0.0434279	0.0141	0.0581	0.957613	0.209382	-0.124646	0.123164	0.267079	0.749818	28.1084	0.078	-0.078	-0.0343644	-0.0651811	0.360805	0.0141	0.0311876	28.0797	0.764671	0.371309	0.786377	0	-0.0241847
2020	TIG	Bất động sản	0.1676	0.2786	0	-0.00293974	0.00293974	0.0434	0.0722	1.37464	0.0210964	0.111845	0.0890052	0.0890052	0.297582	28.25	0.057	-0.057	-0.117805	0.111845	0.0430483	0.0434	0.0890052	28.25	0.297582	0.0347604	1.69813	0	0.552072
2021	TIG	Bất động sản	0.2397	0.4314	0	-0.463559	0.463559	0.0725	0.1499	0.73201	0.291242	0.111845	0.405995	0.0890052	0.297582	28.25	0.093	-0.093	-0.396195	0.234145	0.0398553	0.0725	0.11231	28.8891	0.429029	0.0210349	2.23008	0	0.922199
2022	TIG	Bất động sản	0.1991	0.4427	0	0.135805	0.135805	0.058	0.125	0.914088	-0.0704642	0.234145	-0.10429	0.405995	0.429029	28.8891	0.168	0.168	0.14789	0.0105794	0.0209756	0.058	-0.0341312	29.0933	0.420618	0.0171011	1.5812	0	0.0410721
2023	TIG	Bất động sản	0.1991	0.4132	0	0.0623031	0.0623031	0.0525	0.1013	1.01682	-0.0251475	0.0105794	-0.113205	-0.10429	0.420618	29.0933	0.015	0.015	0.160305	0.0669833	0.0379848	0.0525	-0.0311809	29.0521	0.376381	0.0395821	2.60115	0	0.306381
2024	TIG	Bất động sản	0.1992	0.3728	0	-0.396145	0.396145	0.043	0.0755	1.11789	0.0245134	0.0669833	0.384618	-0.113205	0.376381	29.0521	0.057	0.057	-0.350618	0.0635127	0.0340721	0.043	0.0941743	29.0355	0.485749	0.0346422	1.83638	0	0.213401
2020	TJC	Công nghiệp	0.0298	0.6647	0.3349	0.0187147	0.0187147	0.0194	0.0229	1.35858	-0.000290034	-0.272117	0.0694905	0.0694905	0.109227	25.3997	0.006	-0.006	-0.00199051	-0.272117	0.512599	0.0194	0.0694905	25.3997	0.109227	0.551358	4.13374	0	-0.234237
2021	TJC	Công nghiệp	0.0298	0.725	0.3349	-0.444214	0.444214	0.1411	0.1655	1.55756	0.0602626	-0.272117	0.310079	0.0694905	0.109227	25.3997	0.116	0.116	-0.243179	0.390273	0.488494	0.1411	0.0746959	25.6439	0.177406	0.382653	3.42306	0	0.407868
2022	TJC	Công nghiệp	0.0298	0.83	0.3349	-0.187367	0.187367	0.3173	0.3722	0.820577	-0.320652	0.390273	0.128887	0.310079	0.177406	25.6439	0	0.000	-0.0850874	0.166214	0.216538	0.3173	0.0361367	25.8828	0.124009	0.170519	6.58505	0	0.157511
2023	TJC	Công nghiệp	0.0205	0.8753	0.3349	0.19413	0.19413	0.2154	0.2398	0.891691	0.043204	0.166214	-0.108905	0.128887	0.124009	25.8828	0.035	-0.035	0.155105	-0.585935	0.0665565	0.2154	-0.0304634	26.0091	0.0818116	0.0586616	9.59385	0	-0.609155
2024	TJC	Công nghiệp	0.0205	0.9113	0.3349	0.101441	0.101441	0.0115	0.0121	0.887209	-0.0456424	-0.585935	-0.0483513	-0.108905	0.0818116	26.0091	0.089	0.089	0.0856513	-0.314416	0.0565753	0.0115	-0.01285	25.9066	0.0140298	0.0626822	79.5836	1	-0.94889
2020	TKU	Nguyên vật liệu	0.1082	0.8233	0	-0.124565	0.124565	0.0705	0.133	1.38485	0.0426182	-0.00213181	0.0673756	0.0673756	0.470038	27.6156	0.068	0.068	-0.0641756	-0.00213181	0.33421	0.0705	0.0673756	27.6156	0.470038	0.303345	1.50931	0	-0.00225418
2021	TKU	Nguyên vật liệu	0.0497	0.8452	0	0.137719	0.137719	0.0865	0.1813	0.94746	0.0251577	-0.00213181	-0.111969	0.0673756	0.470038	27.6156	0.1	0.100	0.116969	0.0500889	0.2797	0.0865	-0.0293475	27.8653	0.564299	0.217901	1.3702	0	0.0584849
2022	TKU	Nguyên vật liệu	0.9148	0.8452	0	-0.00642013	0.00642013	0.0557	0.1196	0.942236	0.0371653	0.0500889	-0.0326327	-0.111969	0.564299	27.8653	0.035	0.035	0.0452327	0.238888	0.26221	0.0557	-0.00917137	27.7717	0.501632	0.287931	1.40702	0	0.338255
2023	TKU	Nguyên vật liệu	0.9148	0.8252	0	-0.324415	0.324415	-0.0375	-0.0686	1.20436	0.00263654	0.238888	0.223137	-0.0326327	0.501632	27.7717	0.13	0.130	-0.214537	-0.366563	0.203004	-0.0375	0.053176	27.407	0.383206	0.292355	1.61479	0	-0.3532
2024	TKU	Nguyên vật liệu	0.9148	0.8633	0	-0.360802	0.360802	0.0561	0.1013	1.16374	0.0468815	-0.366563	0.17103	0.223137	0.383206	27.407	0.135	0.135	-0.18203	0.0578707	0.264481	0.0561	0.0350451	27.7053	0.493419	0.196272	1.4966	0	0.0598624
2020	TMB	Năng lượng	0.0028	0.6744	0.6744	0.952519	0.952519	0.0264	0.2276	0.994473	0.00238958	0.0827933	-0.658028	-0.658028	0.902247	28.5748	0.14	0.140	0.665428	0.0827933	0.0531064	0.0264	-0.658028	28.5748	0.902247	0.0331846	1.06709	0	0.012245
2021	TMB	Năng lượng	0.6772	0.6744	0.6744	-0.902298	0.902298	0.0341	0.2249	1.03436	0.000689365	0.0827933	0.317157	-0.658028	0.902247	28.5748	0.128	-0.128	-0.288057	0.0150275	0.0325216	0.0341	0.0975945	27.6479	0.714298	0.082176	1.26161	0	0.00351377
2022	TMB	Năng lượng	0.677	0.6744	0.6744	0.0302384	0.0302384	0.1187	0.529	1.15051	0.0068668	0.0150275	0.471374	0.317157	0.714298	27.6479	0.006	0.006	-0.440274	13.5792	0.0817307	0.1187	0.0668272	28.4503	0.801426	0.036636	1.1961	0	1.25217
2023	TMB	Năng lượng	0.0024	0.6744	0.6744	1.29822	1.29822	0.1068	0.5786	1.11455	0.000931361	13.5792	-1.05815	0.471374	0.801426	28.4503	0.302	-0.302	1.09355	5.40995	0.0193213	0.1068	-0.365318	29.0031	0.823561	0.0111163	1.18697	0	0.494149
2024	TMB	Năng lượng	0.0024	0.6744	0.6744	0.149654	0.149654	0.05	0.2592	1.0726	0.00153355	5.40995	0.0429484	-1.05815	0.823561	29.0031	0.513	-0.513	-0.0126484	1.18238	0.0120578	0.05	0.0136315	29.0279	0.79097	0.0117622	1.23263	0	0.125633
2020	TMC	Tiêu dùng không thiết yếu	0.0151	0.7407	0.6591	0.0702691	0.0702691	0.023	0.0389	0.850968	0.0287659	-2.85328	0.0788686	0.0788686	0.385786	26.4912	0.162	0.162	0.0592314	-2.85328	0.454973	0.023	0.0788686	26.4912	0.385786	0.500118	1.25862	0	-0.414604
2021	TMC	Tiêu dùng không thiết yếu	0.0151	0.6591	0.6591	-0.422153	0.422153	0.0422	0.0699	0.794403	0.0194321	-2.85328	0.138171	0.0788686	0.385786	26.4912	0.041	0.041	-0.0228708	0.474148	0.482395	0.0422	0.0329099	26.5274	0.405574	0.465252	1.39157	0	0.10707
2022	TMC	Tiêu dùng không thiết yếu	0.0151	0.7407	0.6591	-0.379113	0.379113	0.0123	0.0232	0.80699	-0.0129812	0.474148	0.121779	0.138171	0.405574	26.5274	0.061	-0.061	-0.0266791	4.53966	0.38695	0.0123	0.0309955	26.6912	0.521339	0.32849	1.20366	0	0.9601
2023	TMC	Tiêu dùng không thiết yếu	0	0.7407	0.6591	0.118879	0.118879	0.0324	0.0624	0.726543	0	4.53966	-0.0370568	0.121779	0.521339	26.6912	0.139	0.139	0.122357	-1.3672	0.307535	0.0324	-0.0100212	26.5612	0.433776	0.350219	1.29817	0	-0.173771
2024	TMC	Tiêu dùng không thiết yếu	0	0.7411	0.5101	-0.18773	0.18773	0.0295	0.0517	0.744865	-0.0164982	-1.3672	0.0694723	-0.0370568	0.433776	26.5612	0.07	-0.070	0.0682277	-0.147764	0.338524	0.0295	0.016241	26.5439	0.424931	0.344423	1.33832	0	-0.0199605
2020	TMX	Nguyên vật liệu	0.1043	0.841	0.5964	0.250178	0.250178	0.0542	0.0867	0.787135	-0.00094484	-1.46697	-0.0315212	-0.0315212	0.344826	25.7467	0.066	-0.066	0.172021	-1.46697	0.00899828	0.0542	-0.0315212	25.7467	0.344826	0.0099041	2.98622	0	-0.290892
2021	TMX	Nguyên vật liệu	0.1043	0.836	0.5964	0.23333	0.23333	0.0215	0.0318	0.675831	0	-1.46697	-0.0444014	-0.0315212	0.344826	25.7467	0.135	0.135	0.187901	-0.673955	0.00716454	0.0215	-0.0105684	25.6242	0.296413	0.00809803	3.52086	0	-0.171228
2022	TMX	Nguyên vật liệu	0.6967	0.5964	0.5964	0.00729172	0.00729172	0.0416	0.0604	0.705514	0	-0.673955	0.0296223	-0.0444014	0.296413	25.6242	0.057	-0.057	0.0317777	0.852228	0.00521811	0.0416	0.00695263	25.6755	0.323878	0.00495702	3.19438	0	0.231139
2023	TMX	Nguyên vật liệu	0.6967	0.836	0.5964	0.230788	0.230788	0.025	0.0374	0.762597	0.0106288	0.852228	-0.0501438	0.0296223	0.323878	25.6755	0.018	0.018	0.108544	-0.712451	0.0144453	0.025	-0.0128576	25.6643	0.338068	0.014608	3.02188	0	-0.165218
2024	TMX	Nguyên vật liệu	0.6987	0.8214	0.5964	0.0669547	0.0669547	0.0093	0.0141	0.779272	0.00155774	-0.712451	0.0149272	-0.0501438	0.338068	25.6643	0.026	0.026	0.0475728	-0.143277	0.0118125	0.0093	0.0037109	25.6402	0.344383	0.0121007	2.99152	0	-0.0393585
2020	TNG	Tiêu dùng không thiết yếu	0.4141	0.3397	0	-0.205773	0.205773	0.0467	0.1387	1.29112	0.161864	-0.0436096	0.0649036	0.0649036	0.677076	28.8994	0.088	-0.088	-0.0391036	-0.0436096	0.413034	0.0467	0.0649036	28.8994	0.677076	0.351741	0.926213	1	-0.0286248
2021	TNG	Tiêu dùng không thiết yếu	0.3888	0.3928	0	-0.148139	0.148139	0.0586	0.178	0.972954	0.16297	-0.0436096	0.0101398	0.0649036	0.677076	28.8994	0.003	-0.003	0.0410602	0.271004	0.422334	0.0586	0.00273812	29.1052	0.665188	0.343771	0.82786	1	0.215037
2022	TNG	Tiêu dùng không thiết yếu	0.3974	0.3248	0	-0.271596	0.271596	0.0607	0.191	1.08731	0.107593	0.271004	0.0873628	0.0101398	0.665188	29.1052	0.022	0.022	-0.0386628	0.304242	0.414976	0.0607	0.0240804	29.2972	0.688043	0.342481	0.891604	1	0.244091
2023	TNG	Tiêu dùng không thiết yếu	0.2709	0.3769	0	-0.285617	0.285617	0.0414	0.1299	1.21619	0.134138	0.304242	0.0908419	0.0873628	0.688043	29.2972	0.009	-0.009	-0.0581419	0.0610108	0.412873	0.0414	0.0248841	29.2855	0.645363	0.417722	0.887909	1	0.0476732
2024	TNG	Tiêu dùng không thiết yếu	0.2917	0.4456	0	-0.333825	0.333825	0.057	0.168	1.2058	0.0890331	0.0610108	0.142674	0.0908419	0.645363	29.2855	0.031	-0.031	-0.120474	0.107171	0.40478	0.057	0.0354602	29.3918	0.674667	0.363969	0.958805	1	0.0790038
2020	TPH	Dịch vụ viễn thông	0.0682	0.5842	0.5094	-0.10486	0.10486	0.0367	0.0672	0.953929	0.055333	0.0231679	0.0836266	0.0836266	0.461729	24.5791	0.065	-0.065	-0.0589266	0.0231679	0.319362	0.0367	0.0836266	24.5791	0.461729	0.284566	0.817321	0	0.0370709
2021	TPH	Dịch vụ viễn thông	0.5577	0.5094	0.5094	-0.128297	0.128297	0.0333	0.0621	1.10422	0.0777386	0.0231679	0.088279	0.0836266	0.461729	24.5791	0.102	0.102	-0.072879	0.053391	0.303684	0.0333	0.0233413	24.5873	0.466476	0.30122	0.677948	0	0.0924498
2022	TPH	Dịch vụ viễn thông	0.0682	0.624	0.49	-0.0530721	0.0530721	0.0334	0.0629	1.06763	0.0313227	0.053391	0.0336114	0.088279	0.466476	24.5873	0.044	0.044	-0.0179114	0.122043	0.275245	0.0334	0.00843706	24.5979	0.471456	0.27233	0.759136	0	0.195024
2023	TPH	Dịch vụ viễn thông	0.0682	0.624	0.49	-0.12029	0.12029	0.0338	0.0651	1.13702	0.0617191	0.122043	0.0902399	0.0336114	0.471456	24.5979	0.1	-0.100	-0.0366399	0.140944	0.268552	0.0338	0.0226801	24.6338	0.490477	0.259087	0.724011	0	0.190488
2024	TPH	Dịch vụ viễn thông	0.0682	0.563	0.49	-0.107415	0.107415	0.0276	0.0549	1.1389	0.0720901	0.140944	0.0984005	0.0902399	0.490477	24.6338	0.051	0.051	-0.0231005	-0.0376738	0.259334	0.0276	0.0250414	24.655	0.505929	0.253892	0.709773	0	-0.0443321
2020	TPP	Nguyên vật liệu	0.0776	0.5101	0	-0.207458	0.207458	0.0102	0.0398	1.00982	0.0280835	0.0278548	0.0293759	0.0293759	0.748181	27.5021	0.071	0.071	0.0427241	0.0278548	0.322822	0.0102	0.0293759	27.5021	0.748181	0.297081	1.01702	0	0.0248991
2021	TPP	Nguyên vật liệu	0.1221	0.6162	0	-0.220768	0.220768	0.0078	0.0299	0.981132	0.0252412	0.0278548	-0.125078	0.0293759	0.748181	27.5021	0.112	-0.112	0.198178	0.503578	0.33907	0.0078	-0.032568	27.8495	0.735178	0.239581	1.08582	1	0.477263
2022	TPP	Nguyên vật liệu	0.0124	0.5101	0	-0.144213	0.144213	0.0092	0.0357	0.956362	0.122199	0.503578	-0.0940036	-0.125078	0.735178	27.8495	0.196	-0.196	0.171804	0.592042	0.361936	0.0092	-0.0275415	28.2916	0.744828	0.232608	1.06393	1	0.537553
2023	TPP	Nguyên vật liệu	0.0185	0.5101	0	-0.192801	0.192801	0.0102	0.0397	0.976657	0.0127155	0.592042	-0.0568243	-0.0940036	0.744828	28.2916	0.039	-0.039	0.0592243	0.206689	0.207165	0.0102	-0.0172962	28.3085	0.738972	0.20368	1.04099	1	0.189917
2024	TPP	Nguyên vật liệu	0.0124	0.5101	0	-0.412319	0.412319	0.019	0.0778	0.963647	0.0193948	0.206689	0.0429935	-0.0568243	0.738972	28.3085	0.055	-0.055	0.0248065	0.338963	0.282285	0.019	0.0108396	28.51	0.769334	0.230774	1.05601	0	0.266226
2020	TSB	Công nghiệp	0.0399	0.51	0.51	-0.298628	0.298628	0.0408	0.0575	1.09222	0	-0.415649	0.100072	0.100072	0.196104	25.3068	0.105	-0.105	-0.0648719	-0.415649	0.275517	0.0408	0.100072	25.3068	0.196104	0.346216	3.3433	0	-0.23691
2021	TSB	Công nghiệp	0.0399	0.51	0.51	-0.27277	0.27277	0.0459	0.0582	2.3306	0.0597725	-0.415649	0.0850982	0.100072	0.196104	25.3068	0.048	-0.048	-0.0477982	0.158219	0.338747	0.0459	0.0188553	25.3541	0.226635	0.323103	3.23282	0	0.0940458
2022	TSB	Công nghiệp	0.0399	0.51	0.51	-0.138054	0.138054	0.0336	0.0436	3.02727	0.00847838	0.158219	0.0043275	0.0850982	0.226635	25.3541	0.193	0.193	0.0402725	0.0245449	0.270754	0.0336	0.00110745	25.3533	0.230738	0.270968	3.25922	0	0.0139811
2023	TSB	Công nghiệp	0.0537	0.51	0	-0.372912	0.372912	0.04	0.0535	2.96533	0.0040951	0.0245449	0.178231	0.0043275	0.230738	25.3533	0.061	0.061	-0.109831	-0.244696	0.218047	0.04	0.0445402	25.4139	0.271323	0.205224	2.92058	0	-0.137351
2024	TSB	Công nghiệp	0.0496	0.51	0	-0.343123	0.343123	0.0463	0.0653	2.79852	0.0291646	-0.244696	0.0837094	0.178231	0.271323	25.4139	0.956	0.956	0.00679058	0.225001	0.180287	0.0463	0.0215614	25.4817	0.310198	0.168459	2.67667	0	0.155553
2020	TTC	Nguyên vật liệu	0.0049	0.51	0	-0.123945	0.123945	0.0751	0.1247	0.851603	-0.00358038	-0.446219	0.00790706	0.00790706	0.390189	26.0215	0.036	0.036	-0.00760706	-0.446219	0.138219	0.0751	0.00790706	26.0215	0.390189	0.138826	2.23545	0	-0.231704
2021	TTC	Nguyên vật liệu	0.0049	0.6085	0	-0.378044	0.378044	0.0671	0.1041	0.720027	0	-0.446219	0.169483	0.00790706	0.390189	26.0215	0.129	-0.129	-0.163783	-0.294811	0.111136	0.0671	0.042278	25.9073	0.316969	0.124581	2.79336	0	-0.19838
2022	TTC	Nguyên vật liệu	0.0054	0.6085	0	-0.0445242	0.0445242	0.0636	0.0942	0.743614	0.00792552	-0.294811	-0.0261861	0.169483	0.316969	25.9073	0.012	0.012	0.0499861	0.419846	0.103948	0.0636	-0.00617313	25.9346	0.331789	0.101151	2.73749	0	0.314398
2023	TTC	Nguyên vật liệu	0.0054	0.6085	0	-0.0942968	0.0942968	0.0409	0.0625	0.669929	-0.0117896	0.419846	0.0347111	-0.0261861	0.331789	25.9346	0.032	-0.032	-0.0242111	-0.4665	0.0837342	0.0409	0.00879608	25.9542	0.359054	0.0821058	2.60553	0	-0.273123
2024	TTC	Nguyên vật liệu	0.0055	0.6085	0.51	-0.107237	0.107237	0.0175	0.0258	0.661031	0.00710222	-0.4665	-0.0061554	0.0347111	0.359054	25.9542	0.119	-0.119	0.0249554	-0.294665	0.058022	0.0175	-0.00155396	25.8043	0.277144	0.0674096	3.47975	0	-0.242048
2020	TTT	Công nghiệp	0	0.8071	0	-0.0274302	0.0274302	0.005	0.0086	0.586023	0.00484763	-0.377125	0.0413451	0.0413451	0.104193	26.8016	0.125	0.125	0.0980549	-0.377125	0.129224	0.005	0.0413451	26.8016	0.104193	0.142427	8.16405	0	-0.688556
2021	TTT	Công nghiệp	0	0.8471	0	0.0435055	0.0435055	0.0128	0.0225	0.554958	0.00183354	-0.377125	-0.009903	0.0413451	0.104193	26.8016	0.087	0.087	0.161803	-0.0394172	0.0574133	0.0128	-0.00235543	26.7286	0.0591769	0.0617611	15.8096	0	-0.209658
2022	TTT	Công nghiệp	0	0.8471	0	-0.156547	0.156547	0.0629	0.1098	0.427853	0.00882914	-0.0394172	0.0573101	-0.009903	0.0591769	26.7286	0.027	0.027	0.16599	0.198218	0.0534371	0.0629	0.0138048	26.8316	0.0873293	0.0482067	10.8657	0	1.24009
2023	TTT	Công nghiệp	0	0.8471	0	-0.0407257	0.0407257	0.0525	0.0936	0.399134	0.00287673	0.198218	-0.00175589	0.0573101	0.0873293	26.8316	0.095	0.095	0.123356	-0.00809901	0.0406709	0.0525	-0.00046156	26.9018	0.105386	0.0379137	9.08072	0	-0.0250733
2024	TTT	Công nghiệp	0	0.8473	0	0.054353	0.054353	0.0441	0.0479	0.363782	0.00858626	-0.00809901	-0.0642816	-0.00175589	0.105386	26.9018	0.016	0.016	0.197582	-0.0355657	0.0312372	0.0441	-0.0166343	26.8766	0.0527929	0.0320371	18.1743	0	-0.121151
2020	TV3	Công nghiệp	0.0453	0.5647	0.4878	-0.494526	0.494526	0.0621	0.1751	1.18493	0.0568193	0.0507983	0.0475431	0.0475431	0.637308	26.4881	0.08	0.080	0.0045569	0.0507983	0.0881594	0.0621	0.0475431	26.4881	0.637308	0.0866262	0.995484	0	0.0410458
2021	TV3	Công nghiệp	0.0938	0.5389	0.4878	-0.30886	0.30886	0.0623	0.1675	1.07337	0.0720891	0.0507983	-0.0650508	0.0475431	0.637308	26.4881	0.307	0.307	0.0783508	-0.286937	0.0622907	0.0623	-0.0164053	26.5169	0.619459	0.060524	1.02146	0	-0.22665
2022	TV3	Công nghiệp	0.0581	0.669	0.4878	-0.28134	0.28134	0.0665	0.149	0.854295	0.000188101	-0.286937	-0.101712	-0.0650508	0.619459	26.5169	0.105	-0.105	0.114012	-0.185748	0.05181	0.0665	-0.0257938	26.3197	0.472842	0.0631016	1.20722	0	-0.19526
2023	TV3	Công nghiệp	0.0087	0.7487	0.4878	-0.305221	0.305221	0.0536	0.1017	0.859201	0.00300017	-0.185748	0.0228218	-0.101712	0.472842	26.3197	0.004	-0.004	-0.00142182	-0.186726	0.0571016	0.0536	0.00514482	26.3721	0.473749	0.0541881	1.32603	0	-0.200268
2024	TV3	Công nghiệp	0.002	0.6998	0.4878	-0.290575	0.290575	0.0428	0.0773	0.818853	0.0296442	-0.186726	0.0276253	0.0228218	0.473749	26.3721	0.099	-0.099	-0.0285253	-0.0557848	0.0443383	0.0428	0.00708713	26.3055	0.417617	0.0473902	1.38384	0	-0.0788354
2020	TVD	Năng lượng	0.003	0.6683	0.6683	-0.17114	0.17114	0.0254	0.1282	1.01225	0.154948	-0.020436	0.199407	0.199407	0.806847	28.6133	0.036	-0.036	-0.177607	-0.020436	0.499756	0.0254	0.199407	28.6133	0.806847	0.469842	0.745125	0	-0.0112877
2021	TVD	Năng lượng	0.0006	0.6683	0.6683	-0.348393	0.348393	0.0434	0.2031	0.930894	0.0936343	-0.020436	0.261955	0.199407	0.806847	28.6133	0.396	-0.396	-0.170155	0.316554	0.367604	0.0434	0.0675091	28.4923	0.763672	0.414892	0.71574	1	0.188101
2022	TVD	Năng lượng	0.0032	0.6683	0.6683	-0.195702	0.195702	0.0696	0.29	0.998748	0.0913647	0.316554	0.0948356	0.261955	0.763672	28.4923	0.063	-0.063	-0.0455356	0.597868	0.342972	0.0696	0.0222761	28.6261	0.754398	0.300013	1.16752	0	0.264936
2023	TVD	Năng lượng	0.0032	0.6683	0.6683	-0.215118	0.215118	0.0572	0.2015	0.891382	0.058084	0.597868	0.154053	0.0948356	0.754398	28.6261	0.137	-0.137	-0.121353	-0.0805179	0.213221	0.0572	0.0410863	28.3851	0.667161	0.271335	1.2616	0	-0.0322461
2024	TVD	Năng lượng	0.0063	0.6683	0.6683	-0.112417	0.112417	0.0415	0.1376	0.922261	0.129473	-0.0805179	0.105446	0.154053	0.667161	28.3851	0.218	0.218	-0.0932463	-0.0296071	0.357114	0.0415	0.0232	28.5361	0.725836	0.30705	1.14232	0	-0.00962808
2020	VBC	Nguyên vật liệu	0	0.855	0.5096	-0.268108	0.268108	0.0598	0.2137	1.14356	0.00201225	-0.148685	0.200121	0.200121	0.684651	26.7713	0.146	0.146	-0.178921	-0.148685	0.195936	0.0598	0.200121	26.7713	0.684651	0.232687	1.15752	0	-0.075517
2021	VBC	Nguyên vật liệu	0	0.8581	0.5096	-0.134682	0.134682	0.0656	0.2039	1.08878	0.00182975	-0.148685	0.0909092	0.200121	0.684651	26.7713	0.313	0.313	-0.0435092	0.264337	0.192282	0.0656	0.0207786	26.7964	0.672344	0.187518	1.22523	0	0.122287
2022	VBC	Nguyên vật liệu	0	0.8581	0.5096	-0.0139287	0.0139287	0.061	0.1865	0.971844	0.0479338	0.264337	-0.0247017	0.0909092	0.672344	26.7964	0.072	0.072	0.0688017	-0.0745423	0.19429	0.061	-0.00625291	26.8534	0.67314	0.183532	1.21624	0	-0.0315078
2023	VBC	Nguyên vật liệu	0	0.8581	0.5096	-0.332146	0.332146	0.0662	0.1823	0.983752	0.0151331	-0.0745423	0.181001	-0.0247017	0.67314	26.8534	0.072	0.072	-0.144001	-0.261105	0.162167	0.0662	0.0465386	26.6847	0.593456	0.191962	1.35128	0	-0.120635
2024	VBC	Nguyên vật liệu	0	0.858	0.5096	-0.106069	0.106069	0.0708	0.1722	0.959032	0.0307463	-0.261105	0.0699471	0.181001	0.593456	26.6847	0.052	0.052	0.0722529	-0.135356	0.178882	0.0708	0.0160155	26.715	0.584124	0.173548	1.40015	0	-0.0600776
2020	VC2	Công nghiệp	0.2117	0.7731	0	-0.235251	0.235251	0.0088	0.0522	1.23371	-0.00219857	-0.0513317	0.0180244	0.0180244	0.813672	28.1446	0.004	0.004	-0.0161244	-0.0513317	0.0467081	0.0088	0.0180244	28.1446	0.813672	0.0549381	1.07725	0	-0.0784799
2021	VC2	Công nghiệp	0.0909	0.3918	0	-0.122365	0.122365	0.0316	0.1287	0.848442	0.161611	-0.0513317	-0.0356042	0.0180244	0.813672	28.1446	0.026	-0.026	0.0923042	-0.179332	0.0464345	0.0316	-0.00818036	28.4146	0.702282	0.0354464	1.13772	0	-0.252956
2022	VC2	Công nghiệp	0.0013	0.3918	0	0.0836151	0.0836151	0.0131	0.0454	0.913475	0.0100223	-0.179332	-0.114755	-0.0356042	0.702282	28.4146	0.282	-0.282	0.217955	0.0385879	0.0327395	0.0131	-0.0325387	28.4615	0.705698	0.0312415	1.1584	0	0.0954466
2023	VC2	Công nghiệp	0.0547	0.3918	0	0.0992064	0.0992064	0.006	0.0201	0.930561	-0.002294	0.0385879	-0.104977	-0.114755	0.705698	28.4615	0.037	-0.037	0.231177	0.0516591	0.0250929	0.006	-0.0268587	28.6512	0.678598	0.0207564	1.25315	0	0.122238
2024	VC2	Công nghiệp	0.0527	0.4143	0	-0.176069	0.176069	0.0207	0.0631	0.902876	0.0168842	0.0516591	0.117722	-0.104977	0.678598	28.6512	0.113	-0.113	0.0232782	0.052117	0.0178369	0.0207	0.032214	28.657	0.666225	0.0177346	1.44351	0	0.132847
2020	VCC	Công nghiệp	0.0347	0.51	0	0.0645485	0.0645485	0.0075	0.041	1.23666	0.0028509	-0.233267	-0.0788003	-0.0788003	0.828568	27.4989	0.034	-0.034	0.0928003	-0.233267	0.0642243	0.0075	-0.0788003	27.4989	0.828568	0.0593858	1.09204	1	-0.186083
2021	VCC	Công nghiệp	0.0317	0.6633	0	0.00481235	0.00481235	0.0076	0.0476	1.00898	0.00799132	-0.233267	0.0581772	-0.0788003	0.828568	27.4989	0.051	-0.051	-0.0419772	0.0412423	0.049246	0.0076	0.0151136	27.627	0.848731	0.0433277	1.1354	1	0.0437151
2022	VCC	Công nghiệp	0.0273	0.6633	0	-0.0790469	0.0790469	0.0076	0.0553	0.999301	0.00432337	0.0412423	0.113099	0.0581772	0.848731	27.627	0.091	-0.091	-0.0663985	0.145515	0.0365886	0.0076	0.0300823	27.8069	0.872481	0.0305652	1.14114	1	0.167966
2023	VCC	Công nghiệp	0.0355	0.6633	0.6633	0.0682197	0.0682197	0.0067	0.0392	0.954554	0.000965815	0.145515	-0.0957371	0.113099	0.872481	27.8069	0.026	-0.026	0.114837	0.159394	0.0268839	0.0067	-0.0260811	27.8818	0.78833	0.0249429	1.22499	1	0.18857
2024	VCC	Công nghiệp	0.0323	0.7112	0.7112	-0.00857928	0.00857928	0.0059	0.0275	0.953368	0.00466864	0.159394	-0.0251069	-0.0957371	0.78833	27.8818	0.068	0.068	0.0409069	-0.109573	0.0174636	0.0059	-0.00651179	27.8401	0.780059	0.018208	1.2192	1	-0.117551
2020	VCM	Tiêu dùng không thiết yếu	0.2143	0.6122	0	0.0242845	0.0242845	0.0722	0.1125	0.812295	0	-0.508302	-0.0492084	-0.0492084	0.281506	25.3456	0.093	0.093	0.0475084	-0.508302	0.132873	0.0722	-0.0492084	25.3456	0.281506	0.16286	2.60625	1	-0.700016
2021	VCM	Tiêu dùng không thiết yếu	0.2143	0.6122	0	0.0139264	0.0139264	0.01	0.0135	0.911929	0	-0.508302	-0.016878	-0.0492084	0.281506	25.3456	0.141	-0.141	0.092078	0.0178416	0.139059	0.01	-0.00379164	25.2407	0.224165	0.154444	2.76258	0	0.0668257
2022	VCM	Tiêu dùng không thiết yếu	0.1002	0.6122	0	-0.0328292	0.0328292	0.0024	0.0033	0.711739	-0.00198489	0.0178416	0.0465906	-0.016878	0.224165	25.2407	0.117	-0.117	0.0123094	-0.118017	0.128833	0.0024	0.0110371	25.2759	0.288041	0.124382	2.46992	0	-0.373069
2023	VCM	Tiêu dùng không thiết yếu	0.1002	0.657	0	0.111373	0.111373	0.0095	0.0127	0.523627	0.0105398	-0.118017	-0.0918096	0.0465906	0.288041	25.2759	0.023	0.023	0.12961	0.0711417	0.105635	0.0095	-0.0233558	25.1775	0.213139	0.116549	3.19056	0	0.37155
2024	VCM	Tiêu dùng không thiết yếu	0.0085	0.24	0	0.167901	0.167901	0.0395	0.0512	0.763665	2.83175e-05	0.0711417	-0.105715	-0.0918096	0.213139	25.1775	0.022	0.022	0.153715	0.393024	0.00171188	0.0395	-0.0251305	25.2679	0.240964	0.00156397	2.95854	0	1.35643
2020	VCS	Nguyên vật liệu	0.0411	0.8416	0	-0.504516	0.504516	0.2455	0.391	3.15317	0.0158308	0.0173416	0.225736	0.225736	0.362905	29.432	0.026	-0.026	-0.202936	0.0173416	0.182343	0.2455	0.225736	29.432	0.362905	0.168143	2.45281	1	0.0174071
2021	VCS	Nguyên vật liệu	0.0411	0.8416	0	-0.555022	0.555022	0.2737	0.4059	1.58115	0.00678693	0.0173416	0.180768	0.225736	0.362905	29.432	0.053	0.053	-0.110768	0.232941	0.171204	0.2737	0.047023	29.5615	0.292868	0.1504	3.11314	1	0.249229
2022	VCS	Nguyên vật liệu	0.0411	0.8415	0	-0.287224	0.287224	0.1704	0.2358	1.61598	0.00883986	0.232941	0.172903	0.180768	0.292868	29.5615	0	-0.000	0.0113968	-0.204538	0.14149	0.1704	0.0460219	29.5166	0.261182	0.147996	3.40349	1	-0.199411
2023	VCS	Nguyên vật liệu	0.0411	0.8415	0	-0.325478	0.325478	0.1296	0.1718	1.76036	0.00474312	-0.204538	0.201739	0.172903	0.261182	29.5166	0.052	-0.052	0.140261	-0.198243	0.131662	0.1296	0.0493013	29.4979	0.229186	0.134138	3.82853	1	-0.230803
2024	VCS	Nguyên vật liệu	0.041	0.8415	0	-0.549742	0.549742	0.1248	0.1599	1.78095	0.012194	-0.198243	0.265385	0.201739	0.229186	29.4979	0.042	-0.042	-0.189985	-0.00491474	0.122158	0.1248	0.0657281	29.4977	0.20989	0.122182	4.12579	1	-0.00730151
2020	VGS	Nguyên vật liệu	0.3425	0.4992	0	0.0154744	0.0154744	0.0594	0.142	1.37837	0.00511523	-0.0948189	0.172804	0.172804	0.555942	28.1646	0.101	0.101	0.158996	-0.0948189	0.0909694	0.0594	0.172804	28.1646	0.555942	0.0938396	1.40361	0	-0.0243951
2021	VGS	Nguyên vật liệu	0.4588	0.5665	0	0.135525	0.135525	0.0681	0.1622	0.846471	0.146951	-0.0948189	0.120706	0.172804	0.555942	28.1646	0.052	0.052	0.386894	0.00813288	0.0862963	0.0681	0.0297078	28.3635	0.599506	0.0707319	1.32557	0	0.00207915
2022	VGS	Nguyên vật liệu	0.4588	0.618	0	0.0588056	0.0588056	0.0472	0.1138	1.07083	0.0227172	0.00813288	0.027109	0.120706	0.599506	28.3635	0.036	-0.036	0.187091	0.86509	0.0675448	0.0472	0.007449	28.4034	0.571991	0.0649052	1.21302	0	0.269264
2023	VGS	Nguyên vật liệu	0.4171	0.618	0	0.223268	0.223268	0.0252	0.0609	1.29119	0.173026	0.86509	0.0255731	0.027109	0.571991	28.4034	0.033	-0.033	0.164927	-0.428446	0.0582003	0.0252	0.00652068	28.526	0.599004	0.0514846	1.17612	0	-0.109338
2024	VGS	Nguyên vật liệu	0.4028	0.5619	0	0.185627	0.185627	0.046	0.1063	1.28538	0.0520267	-0.428446	0.0382325	0.0255731	0.599004	28.526	0.011	0.011	0.0593675	-0.0955453	0.0439431	0.046	0.0101433	28.4786	0.535332	0.0460742	1.2713	0	-0.0309472
2020	VHE	Tiêu dùng thiết yếu	0.2275	0.4672	0	0.502145	0.502145	0.0041	0.006	0.852859	0.0611877	-0.124369	-0.240728	-0.240728	0.295581	26.1746	0.061	-0.061	0.292028	-0.124369	0.419136	0.0041	-0.240728	26.1746	0.295581	0.31285	2.59673	0	-0.150698
2021	VHE	Tiêu dùng thiết yếu	0.0229	0	0	1.25828	1.25828	0.0067	0.0087	0.422922	0.00918598	-0.124369	-0.687777	-0.240728	0.295581	26.1746	0.01	0.010	0.743377	0.466389	0.293659	0.0067	-0.196911	26.7078	0.183973	0.172301	4.80866	0	0.891462
2022	VHE	Tiêu dùng thiết yếu	0.0932	0	0	0.00998647	0.00998647	0.0037	0.0044	0.379037	0.00016363	0.466389	0.0199021	-0.687777	0.183973	26.7078	0.138	0.138	0.197998	0.0873069	0.15511	0.0037	0.00627137	26.6651	0.126538	0.161883	7.18359	0	0.15037
2023	VHE	Tiêu dùng thiết yếu	0.1234	0.0591	0	-0.46473	0.46473	0.0041	0.0049	0.431043	0.000554857	0.0873069	0.265608	0.0199021	0.126538	26.6651	0.269	0.269	-0.0863078	0.128977	0.144355	0.0041	0.0649831	26.7454	0.189992	0.133216	4.7404	0	0.185022
2024	VHE	Tiêu dùng thiết yếu	0.1234	0.073	0	0.0378541	0.0378541	0.0042	0.0054	0.475692	0.00827317	0.128977	-0.00269106	0.265608	0.189992	26.7454	0.08	0.080	0.104991	0.295038	0.483066	0.0042	-0.000699762	26.926	0.274482	0.403225	2.17944	0	0.387024
2020	VHL	Nguyên vật liệu	0.0356	0.5048	0	-0.407316	0.407316	0.0664	0.1232	0.990967	0.00709664	-0.0787018	0.119441	0.119441	0.459691	27.8518	0.164	0.164	0.0587589	-0.0787018	0.410857	0.0664	0.119441	27.8518	0.459691	0.422644	1.21155	0	-0.0504968
2021	VHL	Nguyên vật liệu	0.0356	0.5048	0	-0.24707	0.24707	0.0375	0.0663	0.949022	0.00193873	-0.0787018	0.0574298	0.119441	0.459691	27.8518	0.065	-0.065	0.14807	-0.210387	0.357536	0.0375	0.0141544	27.7281	0.406781	0.404612	1.32356	1	-0.138203
2022	VHL	Nguyên vật liệu	0.0411	0.5048	0	-0.151569	0.151569	0.0002	0.0003	0.745999	0.00833095	-0.210387	0.0112407	0.0574298	0.406781	27.7281	0.077	-0.077	0.132359	-0.011639	0.342853	0.0002	0.00263659	27.6571	0.407455	0.368056	1.50193	1	-0.00783954
2023	VHL	Nguyên vật liệu	0.0412	0.659	0	-0.242763	0.242763	-0.0745	-0.1212	0.652318	0.000134327	-0.011639	0.0504476	0.0112407	0.407455	27.6571	0.072	-0.072	0.0562524	-0.383701	0.307455	-0.0745	0.0121648	27.4538	0.35684	0.376766	1.78578	1	-0.242649
2024	VHL	Nguyên vật liệu	0.0408	0.659	0	-0.395123	0.395123	-0.0849	-0.1317	0.695645	0.0286084	-0.383701	0.119382	0.0504476	0.35684	27.4538	0.092	0.092	-0.0407824	-0.0966877	0.314312	-0.0849	0.0268223	27.3148	0.352678	0.36118	2.09632	1	-0.0658825
2020	VIF	Nguyên vật liệu	0	0.91	0.51	-0.0603557	0.0603557	0.0514	0.0583	1.35238	0.00234405	0.011753	-0.0155044	-0.0155044	0.110362	29.3349	0.099	0.099	0.217504	0.011753	0.0352516	0.0514	-0.0155044	29.3349	0.110362	0.0375612	6.93606	1	0.0386568
2021	VIF	Nguyên vật liệu	0	0.91	0.51	-0.01891	0.01891	0.0506	0.0579	0.982697	0.00668829	0.011753	-0.0332019	-0.0155044	0.110362	29.3349	0.024	0.024	0.219502	0.0240511	0.0394094	0.0506	-0.0080372	29.3258	0.114975	0.0397696	6.66173	0	0.0714792
2022	VIF	Nguyên vật liệu	0	0.91	0.51	-0.0877773	0.0877773	0.086	0.0982	1.13034	0.0130123	0.0240511	0.0110687	-0.0332019	0.114975	29.3258	0.037	-0.037	0.118031	-0.00620874	0.0380665	0.086	0.00275458	29.3568	0.102194	0.0369034	7.25685	1	-0.0170653
2023	VIF	Nguyên vật liệu	0	0.91	0.51	-0.122329	0.122329	0.0526	0.0593	1.17709	0.00406495	-0.00620874	0.0214671	0.0110687	0.102194	29.3568	0.1	-0.100	-0.167467	-0.0466662	0.0429775	0.0526	0.00545003	29.3312	0.090367	0.0440902	8.55695	1	-0.134606
2024	VIF	Nguyên vật liệu	0	0.91	0.51	-0.0795312	0.0795312	0.0655	0.0719	1.20201	0.00197223	-0.0466662	-0.00623254	0.0214671	0.090367	29.3312	0.019	-0.019	0.134633	-0.0161917	0.0399827	0.0655	-0.00153822	29.3282	0.086306	0.040105	8.97884	1	-0.0526063
2020	VIT	Nguyên vật liệu	0.0497	0.51	0	-0.152779	0.152779	0.0609	0.1967	1.18621	-0.00258262	-0.183553	0.082088	0.082088	0.678884	27.5912	0.048	0.048	-0.079188	-0.183553	0.46237	0.0609	0.082088	27.5912	0.678884	0.476836	0.922132	0	-0.123459
2021	VIT	Nguyên vật liệu	0.0522	0.51	0	-0.11859	0.11859	0.0352	0.1	1.17455	0.788089	-0.183553	0.132676	0.082088	0.678884	27.5912	0.178	0.178	-0.0616762	-0.0360626	0.404682	0.0352	0.0326582	28.139	0.629983	0.233994	0.954654	1	-0.0268328
2022	VIT	Nguyên vật liệu	0.0522	0.5656	0	0.07338	0.07338	0.0263	0.0823	1.1054	0.164273	-0.0360626	-0.0394484	0.132676	0.629983	28.139	0.036	-0.036	0.108248	0.447988	0.559861	0.0263	-0.0124978	28.4227	0.718013	0.421553	0.782712	1	0.592376
2023	VIT	Nguyên vật liệu	0.0522	0.51	0	0.128926	0.128926	0	0.0001	1.18671	0.061632	0.447988	-0.0536497	-0.0394484	0.718013	28.4227	0.073	-0.073	0.0627497	-0.00139264	0.564179	0	-0.0153026	28.4462	0.744137	0.551096	0.894023	1	-0.00153586
2024	VIT	Nguyên vật liệu	0.049	0.6939	0	-0.178521	0.178521	0.024	0.0868	1.18647	0.087636	-0.00139264	0.140049	-0.0536497	0.744137	28.4462	0.016	-0.016	-0.132549	0.0641362	0.488564	0.024	0.0354229	28.3802	0.701896	0.521886	0.96474	1	0.0725226
2020	VMS	Công nghiệp	0.011	0.51	0.51	-0.112439	0.112439	0.0436	0.0751	0.872892	0.00523731	-0.0218465	0.0576862	0.0576862	0.413394	26.3155	0.102	0.102	-0.0554862	-0.0218465	0.111225	0.0436	0.0576862	26.3155	0.413394	0.106547	2.54087	0	-0.0236092
2021	VMS	Công nghiệp	0.0109	0.51	0.51	-0.0239058	0.0239058	0.0368	0.0624	0.968162	-0.00056907	-0.0218465	-0.00661886	0.0576862	0.413394	26.3155	0.117	0.117	-0.185681	-0.0417969	0.0853833	0.0368	-0.00169026	26.2403	0.407665	0.0920558	2.80624	0	-0.0482925
2022	VMS	Công nghiệp	0.05	0.51	0.51	-0.0880469	0.0880469	0.0401	0.0661	1.65094	-0.00116122	-0.0417969	0.0501207	-0.00661886	0.407665	26.2403	0.221	-0.221	-0.161621	-0.0378446	0.0804852	0.0401	0.012059	26.1973	0.378782	0.0840207	3.53586	0	-0.0426146
2023	VMS	Công nghiệp	0.06	0.6012	0.51	-0.0492563	0.0492563	0.0614	0.0971	1.1985	-0.000475707	-0.0378446	0.00378651	0.0501207	0.378782	26.1973	0.021	-0.021	0.0404135	-0.204112	0.0695187	0.0614	0.000926282	26.18	0.357346	0.0707333	5.51455	0	-0.229967
2024	VMS	Công nghiệp	0.0574	0.5655	0.51	-0.12907	0.12907	0.0649	0.1017	1.25759	0.00621808	-0.204112	0.041116	0.00378651	0.357346	26.18	0.044	0.044	0.078684	0.217148	0.0573686	0.0649	0.01019	26.2012	0.366417	0.0561634	5.55874	0	0.312263
2020	VNC	Công nghiệp	0.0436	0.7115	0.3	-0.552892	0.552892	0.0998	0.1536	1.30291	0.0681898	0.0444428	0.129034	0.129034	0.320916	26.5893	0.154	-0.154	-0.0296343	0.0444428	0.350954	0.0998	0.129034	26.5893	0.320916	0.350354	1.91327	1	0.0277929
2021	VNC	Công nghiệp	0.0436	0.6062	0.3	-0.583048	0.583048	0.0849	0.1247	1.30416	0.0921469	0.0444428	0.177006	0.129034	0.320916	26.5893	0.036	-0.036	-0.0671059	0.0311281	0.379239	0.0849	0.0442893	26.6301	0.304241	0.364096	1.94005	1	0.0189724
2022	VNC	Công nghiệp	0.0437	0.6062	0.3	-0.540762	0.540762	0.1011	0.1391	1.67743	0.0352062	0.0311281	0.101681	0.177006	0.304241	26.6301	0.087	0.087	-0.0622813	0.124075	0.345248	0.1011	0.0259382	26.606	0.228863	0.353644	2.46777	1	0.0773017
2023	VNC	Công nghiệp	0.3436	0.5459	0	-0.69873	0.69873	0.0937	0.1288	1.30816	0.0528917	0.124075	0.230511	0.101681	0.228863	26.606	0.096	-0.096	-0.167011	0.204684	0.356272	0.0937	0.0569354	26.7649	0.2971	0.303929	2.13394	1	0.115562
2024	VNC	Công nghiệp	0.1812	0.4892	0	-0.536171	0.536171	0.0844	0.121	1.35882	0.0526256	0.204684	0.014554	0.230511	0.2971	26.7649	0.076	0.076	0.048846	0.265172	0.287695	0.0844	0.00392699	26.7264	0.308046	0.299006	2.10449	1	0.157317
2020	VSM	Công nghiệp	0.0329	0.7004	0	-0.197211	0.197211	0.093	0.1727	1.28626	0.0211503	0.206396	0.192877	0.192877	0.463332	25.3365	0.115	0.115	-0.132077	0.206396	0.401827	0.093	0.192877	25.3365	0.463332	0.352931	1.45327	0	0.111358
2021	VSM	Công nghiệp	0.0299	0.65	0	-0.309642	0.309642	0.1221	0.2294	0.943741	0.0630594	0.206396	0.188462	0.192877	0.463332	25.3365	0.121	0.121	0.0587382	0.76198	0.322717	0.1221	0.0501678	25.4621	0.444764	0.284621	1.51765	0	0.421173
2022	VSM	Công nghiệp	0.0299	0.65	0	-0.201571	0.201571	0.1208	0.2239	0.823907	0.248889	0.76198	0.135142	0.188462	0.444764	25.4621	0.062	0.062	0.216858	0.569662	0.478664	0.1208	0.0359047	25.6388	0.443744	0.401155	1.63351	0	0.251214
2023	VSM	Công nghiệp	0.0292	0.65	0	-0.16538	0.16538	0.0876	0.1525	0.876884	0.0137198	0.569662	0.204383	0.135142	0.443744	25.6388	0.062	0.062	-0.170883	-0.44225	0.345425	0.0876	0.0555971	25.5911	0.373793	0.362287	2.01845	0	-0.185986
2024	VSM	Công nghiệp	0.0247	0.65	0	-0.243639	0.243639	0.0963	0.1447	0.81905	0.0844977	-0.44225	0.16012	0.204383	0.373793	25.5911	0.03	0.030	-0.12412	0.23442	0.341778	0.0963	0.0390763	25.5467	0.293093	0.357312	2.12386	0	0.115472
2020	VTC	Dịch vụ viễn thông	0.2343	0.6963	0.4667	-0.107436	0.107436	0.0219	0.1276	0.915418	0.0226443	-0.419204	0.0581	0.0581	0.743175	26.668	0.026	0.026	0.00240003	-0.419204	0.0606456	0.0219	0.0581	26.668	0.743175	0.0851605	1.21306	0	-0.343883
2021	VTC	Dịch vụ viễn thông	0.2119	0.6738	0.4667	-0.0858964	0.0858964	0.0012	0.0048	0.863903	0.00108985	-0.419204	0.117301	0.0581	0.743175	26.668	0.14	-0.140	-0.0677015	-0.754213	0.0695721	0.0012	0.0243948	26.2619	0.653516	0.104424	1.34375	0	-0.67152
2022	VTC	Dịch vụ viễn thông	0.2096	0.6757	0.4683	-0.0385554	0.0385554	0.002	0.0073	0.833004	0.00173658	-0.754213	-0.129937	0.117301	0.653516	26.2619	0.004	0.004	0.189837	0.473575	0.0834249	0.002	-0.0259776	26.2882	0.678443	0.0812579	1.3232	0	0.855225
2023	VTC	Dịch vụ viễn thông	0.2094	0.6732	0.4683	-0.0140512	0.0140512	0.0034	0.0132	0.84297	-0.0139445	0.473575	-0.0889071	-0.129937	0.678443	26.2882	0.029	-0.029	0.0998071	-0.3148	0.0679187	0.0034	-0.0225193	26.3255	0.700751	0.0654363	1.32585	0	-0.314601
2024	VTC	Dịch vụ viễn thông	0.2094	0.6713	0.4667	-0.313951	0.313951	0.0133	0.0436	0.8302	0.00792964	-0.3148	0.160595	-0.0889071	0.700751	26.3255	0.279	-0.279	-0.145195	0.212201	0.0542746	0.0133	0.0408961	26.2763	0.688023	0.0570082	1.35536	0	0.321144
2020	VTH	Công nghiệp	0.2925	0.7069	0	0.215224	0.215224	0.0006	0.0011	0.84257	0.0777525	0.107128	-0.156405	-0.156405	0.492263	25.7704	0.039	0.039	0.0640047	0.107128	0.264492	0.0006	-0.156405	25.7704	0.492263	0.20855	1.62724	0	0.0618462
2021	VTH	Công nghiệp	0.403	0.7285	0	0.117571	0.117571	0.0245	0.0524	0.771035	0.0681208	0.107128	-0.0631793	-0.156405	0.492263	25.7704	0.047	-0.047	0.162979	0.467939	0.241441	0.0245	-0.0176627	25.9757	0.564267	0.196627	1.36764	0	0.322656
2022	VTH	Công nghiệp	0.4582	0.7837	0	0.145836	0.145836	0.0121	0.0311	0.959121	0.080162	0.467939	-0.0962934	-0.0631793	0.564267	25.9757	0.037	-0.037	0.200793	0.607274	0.168329	0.0121	-0.026536	26.2263	0.650116	0.131021	1.25575	0	0.388736
2023	VTH	Công nghiệp	0.785	0.6738	0	0.194452	0.194452	0.0223	0.0761	0.934707	0.0792671	0.607274	-0.168727	-0.0962934	0.650116	26.2263	0.107	-0.107	0.262427	0.385152	0.243969	0.0223	-0.0474388	26.5841	0.747902	0.170589	1.05611	0	0.228087
2024	VTH	Công nghiệp	0.3671	0.8869	0	0.0979756	0.0979756	0.0214	0.099	0.936892	0.0324309	0.385152	-0.0516225	-0.168727	0.747902	26.5841	0.147	-0.147	0.124023	0.706069	0.196391	0.0214	-0.01519	26.9561	0.80812	0.13538	1.02459	0	0.486933
2020	VTV	Năng lượng	0.0001	0.6945	0.6295	-0.360528	0.360528	0.002	0.005	0.815185	0.00123186	-0.589701	0.188374	0.188374	0.573201	27.5704	0.009	0.009	-0.0723738	-0.589701	0.0215397	0.002	0.188374	27.5704	0.573201	0.0259391	1.37065	0	-0.308073
2021	VTV	Năng lượng	0.0001	0.6945	0.6295	-0.525759	0.525759	0.0149	0.0344	0.711261	0.000104635	-0.589701	0.228437	0.188374	0.573201	27.5704	0.068	-0.068	0.217163	0.54925	0.0227909	0.0149	0.0518174	27.5761	0.562942	0.0226612	1.4408	0	0.344363
2022	VTV	Năng lượng	0.0001	0.6945	0.6295	0.113457	0.113457	0.016	0.046	0.796508	-0.00602116	0.54925	-0.555052	0.228437	0.562942	27.5761	0.049	-0.049	0.912652	2.56878	0.0193464	0.016	-0.139159	28.0129	0.709194	0.0125002	1.23905	0	1.20486
2023	VTV	Năng lượng	0.0001	0.6945	0.6295	-0.437807	0.437807	0.0042	0.0126	0.754133	0	2.56878	0.150322	-0.555052	0.709194	28.0129	0.032	-0.032	0.106878	-1.09256	0.0106982	0.0042	0.0456594	27.6948	0.613625	0.0147051	1.38481	0	-0.359715
2024	VTV	Năng lượng	0.0001	0.6945	0.6295	-0.0446989	0.0446989	-0.0074	-0.0186	0.79409	0.0184039	-1.09256	0.116292	0.150322	0.613625	27.6948	0.001	0.001	-0.123892	-1.39664	0.0127629	-0.0074	0.0244872	27.5839	0.584773	0.0142598	1.44429	0	-0.522475
2020	X20	Tiêu dùng không thiết yếu	0.001	0.7172	0.7172	-0.493527	0.493527	0.0309	0.0674	0.995475	0.00696536	-0.25605	0.216053	0.216053	0.531984	26.9933	0.033	0.033	-0.214253	-0.25605	0.432242	0.0309	0.216053	26.9933	0.531984	0.431979	1.07565	0	-0.148585
2021	X20	Tiêu dùng không thiết yếu	0.001	0.7172	0.7172	-0.608114	0.608114	0.0167	0.0377	0.846341	0.0364944	-0.25605	0.205517	0.216053	0.531984	26.9933	0.087	0.087	-0.203317	0.259996	0.40562	0.0167	0.0513949	27.1298	0.578675	0.353859	1.14461	0	0.177312
2022	X20	Tiêu dùng không thiết yếu	0.001	0.7172	0.7172	-0.499089	0.499089	0.0383	0.0866	0.854107	0.0123168	0.259996	0.0339921	0.205517	0.578675	27.1298	0.007	-0.007	-0.0258921	0.382203	0.31607	0.0383	0.0090772	27.0376	0.535609	0.346595	1.18015	0	0.253784
2023	X20	Tiêu dùng không thiết yếu	0.001	0.7172	0.7172	-0.227961	0.227961	0.0357	0.079	0.86468	0.055506	0.382203	-0.0433682	0.0339921	0.535609	27.0376	0.021	0.021	0.0693682	-0.198169	0.352336	0.0357	-0.0103426	27.103	0.560491	0.330036	1.1638	0	-0.0957067
2024	X20	Tiêu dùng không thiết yếu	0.001	0.7172	0.7172	-0.919435	0.919435	0.0707	0.1648	0.839937	0.0308792	-0.198169	0.310534	-0.0433682	0.560491	27.103	0.066	0.066	-0.382234	0.453358	0.291274	0.0707	0.0801705	27.2586	0.579588	0.249296	1.30771	0	0.258484
2020	AAA	Nguyên vật liệu	0	0.5064	0	-0.148741	0.148741	0.0317	0.0804	0.985882	0.127949	-0.229049	0.0766876	0.0766876	0.530427	29.7792	0.06	-0.060	-0.0249876	-0.229049	0.291085	0.0317	0.0766876	29.7792	0.530427	0.271317	1.19169	1	-0.197613
2021	AAA	Nguyên vật liệu	0	0.5057	0	-0.226413	0.226413	0.0312	0.0692	0.687281	0.0833975	-0.229049	0.0517679	0.0766876	0.530427	29.7792	0.308	0.308	-0.0301679	0.666855	0.245156	0.0312	0.0133969	29.9346	0.455081	0.209884	1.63134	1	0.769268
2022	AAA	Nguyên vật liệu	0.0065	0.5279	0	-0.00556827	0.00556827	0.0147	0.0296	0.796632	0.111517	0.666855	0.00970028	0.0517679	0.455081	29.9346	0.005	0.005	0.0480997	0.214514	0.207545	0.0147	0.00261304	30.0102	0.428373	0.192429	1.76479	1	0.16337
2023	AAA	Nguyên vật liệu	0.0065	0.5017	0	-0.375327	0.375327	0.0259	0.0533	0.769284	0.127899	0.214514	0.242243	0.00970028	0.428373	30.0102	0.03	0.030	-0.191943	-0.247205	0.186459	0.0259	0.0628496	30.0806	0.485138	0.173781	1.52034	1	-0.174541
2024	AAA	Nguyên vật liệu	0	0.5017	0	-0.157687	0.157687	0.0291	0.0604	0.789164	0.0934055	-0.247205	0.0827831	0.242243	0.485138	30.0806	0.134	0.134	-0.0180831	0.0138747	0.262208	0.0291	0.0214241	30.2534	0.547053	0.2206	1.55504	1	0.0127335
2020	AAM	Tiêu dùng thiết yếu	0.5966	0.528	0	0.204421	0.204421	-0.0546	-0.059	0.805495	0.00514686	-0.418603	-0.10686	-0.10686	0.0793015	26.0743	0.044	0.044	0.11416	-0.418603	0.125979	-0.0546	-0.10686	26.0743	0.0793015	0.135952	11.0478	0	-0.440656
2021	AAM	Tiêu dùng thiết yếu	0.5966	0.528	0	-0.376309	0.376309	0.0011	0.0012	0.758121	0.00353892	-0.418603	0.214935	-0.10686	0.0793015	26.0743	0.084	-0.084	-0.209135	0.0627257	0.124451	0.0011	0.051688	26.027	0.0336223	0.130474	29.407	0	0.10939
2022	AAM	Tiêu dùng thiết yếu	0.5332	0.5404	0	-0.024006	0.024006	0.0805	0.0837	0.561033	0.0160012	0.0627257	-0.0197467	0.214935	0.0336223	26.027	0.137	-0.137	0.0285467	0.387381	0.129862	0.0805	-0.00482003	26.1104	0.0413729	0.11947	22.791	0	0.580847
2023	AAM	Tiêu dùng thiết yếu	0.4953	0.5404	0	0.314544	0.314544	0.0033	0.0034	0.462744	0.0200061	0.387381	-0.110856	-0.0197467	0.0413729	26.1104	0.127	0.127	0.111656	-0.344243	0.108177	0.0033	-0.0288691	26.0839	0.0480206	0.111085	18.993	0	-0.354914
2024	AAM	Tiêu dùng thiết yếu	0.4953	0.6729	0	-0.306096	0.306096	-0.0303	-0.0316	0.406748	0.0118976	-0.344243	0.159937	-0.110856	0.0480206	26.0839	0.029	0.029	-0.156937	0.0785503	0.102058	-0.0303	0.0394539	26.0333	0.0297161	0.107356	33.5785	0	0.122255
2020	AAT	Tiêu dùng không thiết yếu	0.0907	0.0987	0	-0.0316619	0.0316619	0.0238	0.0336	1.09838	-0.0585716	-0.0154721	0.00169619	0.00169619	0.267184	27.0861	0.158	-0.158	-0.0459962	-0.0154721	0.495074	0.0238	0.00169619	27.0861	0.267184	0.513017	1.87212	0	-0.0313665
2021	AAT	Tiêu dùng không thiết yếu	0.1074	0.06	0	-0.146172	0.146172	0.037	0.0527	0.645162	0.512117	-0.0154721	0.0830368	0.00169619	0.267184	27.0861	0.156	0.156	-0.0612368	0.320896	0.750052	0.037	0.0203897	27.6074	0.315249	0.445344	2.96645	0	0.648125
2022	AAT	Tiêu dùng không thiết yếu	0.1597	0.1184	0	0.140194	0.140194	0.0877	0.1272	0.654485	-0.189195	0.320896	-0.244179	0.0830368	0.315249	27.6074	0.116	-0.116	0.280579	0.500148	0.162289	0.0877	-0.0766053	27.6627	0.312038	0.153555	2.08479	0	1.03228
2023	AAT	Tiêu dùng không thiết yếu	0.1645	0.1184	0	0.00982727	0.00982727	0.0163	0.0232	0.539799	0	0.500148	0.040099	-0.244179	0.312038	27.6627	0.161	-0.161	-0.012799	-0.350983	0.131945	0.0163	0.010302	27.6423	0.300314	0.134661	2.05335	0	-0.376728
2024	AAT	Tiêu dùng không thiết yếu	0.1645	0.1176	0	0.0211734	0.0211734	-0.0071	-0.0116	0.641045	0.0193743	-0.350983	-0.0668842	0.040099	0.300314	27.6423	0.199	0.199	0.119284	-0.0161613	0.077939	-0.0071	-0.0165507	27.9194	0.456337	0.0590758	1.68931	0	-0.0272704
2020	ABS	Nguyên vật liệu	0.4171	0.369	0	0.361598	0.361598	0.0523	0.1142	1.34153	9.79874e-05	0.472443	-0.410633	-0.410633	0.627991	27.7881	0.189	0.189	0.456233	0.472443	0.0230115	0.0523	-0.410633	27.7881	0.627991	0.0130457	1.17694	0	0.396417
2021	ABS	Nguyên vật liệu	0.1961	0.5582	0	0.527778	0.527778	0.0473	0.096	0.696159	-0.0183452	0.472443	-0.480991	-0.410633	0.627991	27.7881	0.047	0.047	0.548191	0.0809238	0.0111186	0.0473	-0.153483	28.0966	0.418436	0.00816714	1.92464	0	0.0857715
2022	ABS	Nguyên vật liệu	0.201	0.3794	0	0.0371903	0.0371903	0.0138	0.0246	0.744034	0.00150544	0.0809238	-0.038107	-0.480991	0.418436	28.0966	0.237	0.237	0.050807	0.255302	0.00929578	0.0138	-0.0109847	28.1434	0.457442	0.00887078	1.77981	0	0.339285
2023	ABS	Nguyên vật liệu	0.201	0.3783	0	0.320414	0.320414	0.0051	0.0091	0.654786	0.00641401	0.255302	-0.272321	-0.038107	0.457442	28.1434	0.035	-0.035	0.249421	-0.347525	0.00828944	0.0051	-0.0696731	28.0879	0.421251	0.0087622	1.68847	0	-0.361366
2024	ABS	Nguyên vật liệu	0.125	0.125	0	-0.218775	0.218775	0.0019	0.0027	0.452469	-0.000875524	-0.347525	0.291614	-0.272321	0.421251	28.0879	0.012	0.012	-0.271114	-0.398353	0.00617852	0.0019	0.0708823	27.6326	0.0850517	0.00974171	11.201	0	-0.613605
2020	ABT	Tiêu dùng thiết yếu	0.002	0.8911	0	-0.0722273	0.0722273	0.0256	0.0336	1.13979	0.0297891	-0.079932	0.017838	0.017838	0.244616	27.0216	0.005	0.005	-0.00803798	-0.079932	0.118859	0.0256	0.017838	27.0216	0.244616	0.117719	2.0112	1	-0.119176
2021	ABT	Tiêu dùng thiết yếu	0.002	0.8911	0	-0.085759	0.085759	0.0594	0.0815	1.17157	0.0533403	-0.079932	-0.00351834	0.017838	0.244616	27.0216	0.067	-0.067	0.0109183	0.0432931	0.115216	0.0594	-0.000883823	27.1106	0.295618	0.105406	1.722	1	0.0739913
2022	ABT	Tiêu dùng thiết yếu	0.0047	0.8911	0	-0.571947	0.571947	0.1057	0.1446	1.05246	0.0379641	0.0432931	0.225212	-0.00351834	0.295618	27.1106	0.049	-0.049	-0.191212	0.462736	0.15482	0.1057	0.0588066	27.1571	0.243596	0.14779	2.02562	1	0.804899
2023	ABT	Tiêu dùng thiết yếu	0.0047	0.8911	0	-0.205064	0.205064	0.1003	0.1328	1.1101	0.0194508	0.462736	0.0962607	0.225212	0.243596	27.1571	0.043	-0.043	-0.0800607	-0.134891	0.145012	0.1003	0.0246242	27.2024	0.246498	0.138591	2.14402	1	-0.136182
2024	ABT	Tiêu dùng thiết yếu	0.0047	0.8936	0	-0.251986	0.251986	0.1424	0.1927	0.874905	0.0264389	-0.134891	0.125645	0.0962607	0.246498	27.2024	0.041	-0.041	-0.100345	0.078029	0.179589	0.1424	0.0321224	27.3746	0.27299	0.151168	2.26248	1	0.0954201
2020	ACC	Công nghiệp	0	0.727	0	0.852634	0.852634	0.0841	0.1711	1.20074	0.0201466	0.0225781	-0.54639	-0.54639	0.44499	27.54	0.046	-0.046	0.56549	0.0225781	0.14943	0.0841	-0.54639	27.54	0.44499	0.0813464	2.12623	0	0.0236927
2021	ACC	Công nghiệp	0	0.727	0	0.654196	0.654196	0.036	0.0801	0.877858	-0.00254897	0.0225781	-0.501078	-0.54639	0.44499	27.54	0.164	-0.164	0.510678	-0.144425	0.0226947	0.036	-0.162226	27.7928	0.595865	0.0176259	1.80768	0	-0.271956
2022	ACC	Công nghiệp	0	0.727	0	0.61239	0.61239	0.0503	0.0984	1.00589	0.00312615	-0.144425	-0.373232	-0.501078	0.595865	27.7928	0.333	0.333	0.378532	0.246039	0.0102527	0.0503	-0.105038	28.3729	0.420829	0.00574001	2.16608	0	0.819362
2023	ACC	Công nghiệp	0	0.7245	0	0.184187	0.184187	0.0312	0.056	1.08087	0.00057149	0.246039	-0.180258	-0.373232	0.420829	28.3729	0.065	0.065	0.176258	0.00445613	0.00456004	0.0312	-0.0577805	28.4863	0.453649	0.00407095	1.98086	0	0.0145693
2024	ACC	Công nghiệp	0	0.7245	0	-0.211004	0.211004	0.0196	0.0399	1.06577	0.00178503	0.00445613	0.18411	-0.180258	0.453649	28.4863	0.084	0.084	-0.18311	0.0205921	0.00278262	0.0196	0.0486357	28.7254	0.552612	0.00219083	1.17663	0	0.0743312
2020	ACL	Tiêu dùng thiết yếu	0.6057	0.5747	0	0.278128	0.278128	0.0181	0.0414	1.08326	0.0161346	-0.318766	-0.148887	-0.148887	0.581535	28.1376	0.146	0.146	0.156287	-0.318766	0.220545	0.0181	-0.148887	28.1376	0.581535	0.194185	1.36823	0	-0.328583
2021	ACL	Tiêu dùng thiết yếu	0.5965	0.5879	0	-0.371394	0.371394	0.027	0.0601	0.917985	0.00161798	-0.318766	0.218035	-0.148887	0.581535	28.1376	0.006	-0.006	-0.233635	0.157853	0.171719	0.027	0.0579734	28.0082	0.515524	0.195432	1.54094	0	0.275243
2022	ACL	Tiêu dùng thiết yếu	0.656	0.5879	0	-0.167676	0.167676	0.0802	0.1541	0.848113	0.0072931	0.157853	0.0355629	0.218035	0.515524	28.0082	0.005	-0.005	-0.0201629	-0.0320733	0.176669	0.0802	0.00831651	28.024	0.443488	0.173903	1.8391	0	-0.0385333
2023	ACL	Tiêu dùng thiết yếu	0.656	0.6078	0	0.140627	0.140627	0.0061	0.0121	0.885808	0.0185397	-0.0320733	-0.13021	0.0355629	0.443488	28.024	0.147	0.147	0.27001	-0.0339228	0.169098	0.0061	-0.0328093	28.1902	0.543133	0.143208	1.56005	0	-0.0430628
2024	ACL	Tiêu dùng thiết yếu	0.656	0.6079	0	-0.263116	0.263116	0.0063	0.0134	0.871985	0.0126245	-0.0339228	0.0470853	-0.13021	0.543133	28.1902	0.138	0.138	0.0740147	0.361332	0.134503	0.0063	0.0127472	28.1402	0.513272	0.141389	1.64339	0	0.565984
2020	ADP	Nguyên vật liệu	0.5499	0.5906	0	-0.561925	0.561925	0.2516	0.3146	1.39242	0.0097634	0.0918476	0.165192	0.165192	0.186015	26.5216	0.166	0.166	-0.0794921	0.0918476	0.254508	0.2516	0.165192	26.5216	0.186015	0.226398	4.13685	0	0.0493994
2021	ADP	Nguyên vật liệu	0.4999	0.4164	0	-0.3459	0.3459	0.1501	0.1815	1.41453	0.000641574	0.0918476	0.109447	0.165192	0.186015	26.5216	0.115	-0.115	-0.0152474	-0.47822	0.182621	0.1501	0.0289612	26.5252	0.159746	0.181974	5.1208	0	-0.275531
2022	ADP	Nguyên vật liệu	0.4441	0.4877	0	-0.37193	0.37193	0.1162	0.145	1.52332	0.00501306	-0.47822	0.114993	0.109447	0.159746	26.5252	0.163	-0.163	-0.0240933	0.522008	0.152253	0.1162	0.0287993	26.6052	0.234774	0.140543	3.65914	0	0.41662
2023	ADP	Nguyên vật liệu	0.45	0.4877	0	-0.176537	0.176537	0.1593	0.2099	2.00207	0.000902903	0.522008	0.122006	0.114993	0.234774	26.6052	0.031	0.031	-0.021206	-0.198543	0.118801	0.1593	0.0317214	26.6669	0.246869	0.11169	3.59757	0	-0.121177
2024	ADP	Nguyên vật liệu	0.4498	0.4877	0	-0.521151	0.521151	0.2316	0.3049	2.11044	0.00516853	-0.198543	0.136325	0.122006	0.246869	26.6669	0.03	0.030	-0.0208253	0.791031	0.0974392	0.2316	0.0351328	26.5965	0.233615	0.104551	3.83301	0	0.584339
2020	ADS	Tiêu dùng không thiết yếu	0.418	0.3565	0	0.105083	0.105083	0.0118	0.0561	1.20558	-0.0116434	-0.211212	-0.0106012	-0.0106012	0.770311	28.2396	0.189	0.189	0.0655012	-0.211212	0.157976	0.0118	-0.0106012	28.2396	0.770311	0.149002	1.1527	0	-0.214722
2021	ADS	Tiêu dùng không thiết yếu	0.3629	0.297	0	-0.0702065	0.0702065	0.0446	0.1835	0.894569	0.0605771	-0.211212	0.068095	-0.0106012	0.770311	28.2396	0.301	0.301	-0.031495	0.0947505	0.12229	0.0446	0.0175214	28.3167	0.705868	0.113217	1.23585	0	0.130052
2022	ADS	Tiêu dùng không thiết yếu	0.3685	0.3027	0	-0.146965	0.146965	0.0324	0.1164	0.956669	0.107585	0.0947505	0.0704298	0.068095	0.705868	28.3167	0.097	0.097	-0.0997298	0.0903766	0.09084	0.0324	0.0182857	28.4111	0.698814	0.0826572	1.22383	0	0.118569
2023	ADS	Tiêu dùng không thiết yếu	0.3051	0.3567	0	0.0470892	0.0470892	0.0249	0.0863	0.831497	0.0389737	0.0903766	-0.0449089	0.0704298	0.698814	28.4111	0.162	0.162	0.0668089	-0.0232456	0.0717895	0.0249	-0.0117568	28.5488	0.633256	0.0625542	1.32076	0	-0.0299633
2024	ADS	Tiêu dùng không thiết yếu	0.2718	0.3289	0	-0.0635927	0.0635927	0.0196	0.0534	0.889355	0.0274164	-0.0232456	0.0641765	-0.0449089	0.633256	28.5488	0.166	0.166	0.0611235	-0.0051475	0.0560064	0.0196	0.017147	28.588	0.632343	0.0538543	1.23158	0	-0.00784985
2020	AGG	Bất động sản	0.0128	0.473	0	0.490457	0.490457	0.0547	0.2764	1.21371	0.000193436	0.253573	0.00496709	0.00496709	0.762058	29.9086	0.06	-0.060	0.131233	0.253573	0.00686016	0.0547	0.00496709	29.9086	0.762058	0.00379739	2.02112	1	3.55934
2021	AGG	Bất động sản	0.0154	0.4179	0	-0.0431975	0.0431975	0.0376	0.2197	0.983317	-0.148722	0.253573	0.089432	0.00496709	0.762058	29.9086	0.052	-0.052	0.033168	0.00561056	0.00335474	0.0376	0.0287833	30.1619	0.787057	0.0026041	1.82905	1	0.0312047
2022	AGG	Bất động sản	0.074	0.4844	0	-0.595415	0.595415	0.0016	0.0085	1.03287	0.076801	0.00561056	0.224064	0.089432	0.787057	30.1619	0.094	-0.094	-0.0206645	0.348614	0.00165288	0.0016	0.0630725	30.0378	0.754416	0.00187125	1.4464	1	2.42223
2023	AGG	Bất động sản	0.0756	0.4872	0	-0.249334	0.249334	0.0172	0.068	0.905257	-0.0228394	0.348614	0.0108796	0.224064	0.754416	30.0378	0.039	0.039	0.14502	-0.207017	0.00269365	0.0172	0.00255136	29.8603	0.69052	0.00321686	1.57103	1	-0.371259
2024	AGG	Bất động sản	0.2766	0.2615	0	-0.0898924	0.0898924	0.0364	0.0989	0.909863	-0.00536393	-0.207017	-0.101646	0.0108796	0.69052	29.8603	0.024	-0.024	0.277646	-0.212801	0.00216828	0.0364	-0.0231621	29.582	0.554105	0.00286416	1.81232	1	-0.508256
2020	ANV	Tiêu dùng thiết yếu	0.839	0.833	0	0.0146724	0.0146724	0.0451	0.0857	1.25856	0.12147	-0.252069	-0.00714257	-0.00714257	0.517183	29.2067	0.083	-0.083	0.0425426	-0.252069	0.246484	0.0451	-0.00714257	29.2067	0.517183	0.210818	1.19017	0	-0.232589
2021	ANV	Tiêu dùng thiết yếu	0.5691	0.7927	0	-0.191489	0.191489	0.0265	0.0551	1.28413	-0.000236715	-0.252069	0.0518133	-0.00714257	0.517183	29.2067	0.182	-0.182	-0.0239133	0.0114317	0.216411	0.0265	0.0139636	29.2176	0.5221	0.214059	1.24824	0	0.0160708
2022	ANV	Tiêu dùng thiết yếu	0.565	0.6975	0	-0.242499	0.242499	0.1301	0.2582	1.16448	0.0547156	0.0114317	0.0543479	0.0518133	0.5221	29.2176	0.186	0.186	-0.0330479	0.28702	0.225507	0.1301	0.0136612	29.3299	0.472863	0.201566	1.34647	0	0.401474
2023	ANV	Tiêu dùng thiết yếu	0.5558	0.698	0	-0.0254176	0.0254176	0.0074	0.0137	0.991485	-0.019356	0.28702	-0.0149435	0.0543479	0.472863	29.3299	0.031	-0.031	0.0232435	-0.0836784	0.188708	0.0074	-0.00394531	29.2627	0.442979	0.20181	1.40297	0	-0.0934363
2024	ANV	Tiêu dùng thiết yếu	0.5512	0.6607	0	-0.375377	0.375377	0.0096	0.0169	1.50906	0.0468845	-0.0836784	0.142469	-0.0149435	0.442979	29.2627	0.097	0.097	-0.135169	0.0923477	0.209948	0.0096	0.0344224	29.2125	0.424817	0.22076	1.33233	0	0.10636
2020	APH	Nguyên vật liệu	0.1055	0.3545	0	-0.151284	0.151284	0.0076	0.0356	1.03589	0.093188	-0.102954	0.0690145	0.0690145	0.578997	29.976	0.186	-0.186	-0.0625145	-0.102954	0.318595	0.0076	0.0690145	29.976	0.578997	0.30499	1.16472	1	-0.108092
2021	APH	Nguyên vật liệu	0.0863	0.2702	0	-0.235431	0.235431	0.0052	0.0231	0.634514	0.0952153	-0.102954	0.0407034	0.0690145	0.578997	29.976	0.949	0.949	-0.0346034	0.604683	0.286378	0.0052	0.0103979	30.1429	0.517934	0.242369	1.59673	1	0.743555
2022	APH	Nguyên vật liệu	0.0876	0.2751	0	-0.0669706	0.0669706	-0.0016	-0.0068	0.663932	0.0467371	0.604683	0.0205026	0.0407034	0.517934	30.1429	0.691	-0.691	0.00949738	0.205445	0.23707	-0.0016	0.00555228	30.1611	0.501657	0.2328	1.68522	1	0.171202
2023	APH	Nguyên vật liệu	0.0876	0.2751	0	-0.378345	0.378345	0.0028	0.0132	0.66935	0.0944368	0.205445	0.221166	0.0205026	0.501657	30.1611	0.53	-0.530	-0.0870656	-0.223406	0.224181	0.0028	0.0557938	30.1465	0.537083	0.227473	1.38602	1	-0.161871
2024	APH	Nguyên vật liệu	0.0382	0.2624	0	-0.20114	0.20114	0.0092	0.0204	0.686708	0.0987592	-0.223406	0.0850735	0.221166	0.537083	30.1465	0.393	-0.393	0.0169265	-0.0266207	0.24567	0.0092	0.0211134	30.2296	0.55973	0.226075	1.56439	1	-0.0226805
2020	ASG	Công nghiệp	0.0266	0.2487	0	-0.215852	0.215852	0.0479	0.0892	1.2251	0.322013	-0.139077	0.0844036	0.0844036	0.337743	28.3224	0.027	-0.027	-0.0765036	-0.139077	0.242359	0.0479	0.0844036	28.3224	0.337743	0.171448	3.20086	0	-0.222064
2021	ASG	Công nghiệp	0.0266	0.2327	0	-0.140543	0.140543	0.029	0.057	1.2199	0.213753	-0.139077	0.0354348	0.0844036	0.337743	28.3224	0.026	-0.026	0.00176516	0.0170809	0.168266	0.029	0.0103768	28.3912	0.354986	0.157078	1.5112	0	0.0495583
2022	ASG	Công nghiệp	0.0943	0.327	0	-0.304559	0.304559	0.0349	0.0815	0.902723	0.0837031	0.0170809	0.0853662	0.0354348	0.354986	28.3912	0.056	-0.056	-0.0258662	0.587902	0.269198	0.0349	0.0220754	28.763	0.394158	0.185617	2.8967	0	1.74094
2023	ASG	Công nghiệp	0.0943	0.3355	0	-0.124501	0.124501	0.0013	0.0035	0.852199	0.0310969	0.587902	0.0479319	0.0853662	0.394158	28.763	0.025	0.025	0.0357681	-0.0192346	0.150171	0.0013	0.0141851	28.7462	0.393332	0.152708	2.59514	0	-0.0301382
2024	ASG	Công nghiệp	0.0943	0.5064	0	-0.156831	0.156831	0.0089	0.0144	0.886701	0.0663873	-0.0192346	0.0473819	0.0479319	0.393332	28.7462	0.013	0.013	0.122018	-0.00141522	0.149933	0.0089	0.0117463	28.8161	0.378779	0.139813	1.79936	0	-0.00224839
2020	ASM	Tiêu dùng thiết yếu	0.2647	0.5124	0	-0.0261447	0.0261447	0.0286	0.1116	0.829474	0.127819	-0.108946	0.0092355	0.0092355	0.609641	30.4992	0.216	0.216	0.132764	-0.108946	0.446096	0.0286	0.0092355	30.4992	0.609641	0.395207	1.27367	0	-0.119459
2021	ASM	Tiêu dùng thiết yếu	0.3766	0.519	0	-0.101923	0.101923	0.0336	0.1252	0.707677	0.0328711	-0.108946	0.0617782	0.0092355	0.609641	30.4992	0.182	0.182	0.0621218	-0.0639996	0.381352	0.0336	0.0163788	30.5307	0.58301	0.369503	1.42058	0	-0.0899579
2022	ASM	Tiêu dùng thiết yếu	0.3766	0.4624	0	-0.0445719	0.0445719	0.0337	0.1218	0.777023	0.069405	-0.0639996	-0.0187046	0.0617782	0.58301	30.5307	0.18	0.180	0.0878046	0.129412	0.376775	0.0337	-0.00474994	30.58	0.589245	0.358668	1.21731	0	0.206292
2023	ASM	Tiêu dùng thiết yếu	0.1278	0.5976	0	0.0650507	0.0650507	0.0099	0.0373	0.758452	0.0119924	0.129412	-0.0185092	-0.0187046	0.589245	30.58	0.072	0.072	0.0497092	-0.0930544	0.343735	0.0099	-0.00474122	30.642	0.61461	0.323066	1.3518	0	-0.129176
2024	ASM	Tiêu dùng thiết yếu	0.1303	0.5725	0	0.000208278	0.000208278	0.0084	0.0227	0.785431	0.0613574	-0.0930544	-0.0477086	-0.0185092	0.61461	30.642	0.104	0.104	0.115109	0.00196795	0.313095	0.0084	-0.0122969	30.7602	0.646145	0.278183	1.73252	0	0.00333781
2020	ASP	Năng lượng	0.0586	0.5406	0	-0.486646	0.486646	0.0195	0.0687	0.979435	0.0474347	0.101473	0.0250135	0.0250135	0.717482	28.2166	0.035	-0.035	0.0311865	0.101473	0.101065	0.0195	0.0250135	28.2166	0.717482	0.0915525	0.562576	0	0.0645328
2021	ASP	Năng lượng	0.0586	0.5406	0	-0.509204	0.509204	0.0133	0.0523	0.853196	0.0363421	0.101473	0.164028	0.0250135	0.717482	28.2166	0.016	0.016	-0.101428	0.371909	0.0823157	0.0133	0.0430323	28.3381	0.757641	0.072898	0.753008	0	0.245266
2022	ASP	Năng lượng	0.0586	0.5406	0	-0.123421	0.123421	0.0007	0.0032	0.8556	-0.011412	0.371909	-0.0883745	0.164028	0.757641	28.3381	0.068	-0.068	0.122975	0.340541	0.0634852	0.0007	-0.0234342	28.3744	0.766825	0.0612218	0.796971	0	0.203646
2023	ASP	Năng lượng	0.0586	0.5406	0	-0.262601	0.262601	-0.0381	-0.2032	0.894063	0.0327575	0.340541	0.0558672	-0.0883745	0.766825	28.3744	0.03	0.030	-0.0237672	-0.170881	0.0827648	-0.0381	0.0142203	28.4516	0.828155	0.0766158	0.794882	0	-0.0880375
2024	ASP	Năng lượng	0	0.5406	0	-0.17324	0.17324	0.0037	0.0204	0.897948	0.0297672	-0.170881	0.0488248	0.0558672	0.828155	28.4516	0.063	-0.063	-0.0245248	-0.183091	0.048174	0.0037	0.0126771	28.0759	0.803183	0.0701416	0.675175	0	-0.111735
2020	AST	Công nghiệp	0.0069	0.7842	0	-0.242568	0.242568	-0.0654	-0.0908	3.89412	0.00640073	-0.8945	-0.0983891	-0.0983891	0.135541	27.161	0.039	-0.039	0.145889	-0.8945	0.144212	-0.0654	-0.0983891	27.161	0.135541	0.201609	4.3443	1	-0.684958
2021	AST	Công nghiệp	0.0069	0.7864	0	-0.134619	0.134619	-0.2094	-0.2735	5.24756	0.0365411	-0.8945	-0.134887	-0.0983891	0.135541	27.161	0.174	0.174	0.187087	-0.328653	0.186573	-0.2094	-0.0281249	26.9429	0.179243	0.232029	3.2238	1	-0.571408
2022	AST	Công nghiệp	0.006	0.7864	0	-1.30264	1.30264	0.0428	0.0603	4.63647	0.0896545	-0.328653	0.194168	-0.134887	0.179243	26.9429	0.095	-0.095	-0.145368	0.894523	0.223711	0.0428	0.0432709	27.0843	0.213161	0.194212	3.02992	1	2.91784
2023	AST	Công nghiệp	0.006	0.7864	0	-2.05224	2.05224	0.1725	0.2568	3.39053	0.0721142	0.894523	0.307967	0.194168	0.213161	27.0843	0.052	-0.052	-0.274467	0.857026	0.206809	0.1725	0.0824263	27.3582	0.227947	0.157262	3.0369	1	0.82192
2024	AST	Công nghiệp	0.006	0.7864	0	-2.0269	2.0269	0.1841	0.2465	3.14959	0.0539442	0.857026	0.342842	0.307967	0.227947	27.3582	0.021	-0.021	-0.293442	0.302596	0.178823	0.1841	0.097375	27.4724	0.275385	0.159535	2.58427	1	0.209467
2020	BBC	Tiêu dùng thiết yếu	0.0003	0.941	0	-0.0376194	0.0376194	0.0621	0.092	0.974468	-0.0635867	-0.18148	-0.270206	-0.270206	0.289923	28.0648	0.099	0.099	0.329206	-0.18148	0.302283	0.0621	-0.270206	28.0648	0.289923	0.30764	1.66554	1	-0.189553
2021	BBC	Tiêu dùng thiết yếu	0.0001	0.5894	0	-0.678796	0.678796	0.0141	0.0216	0.905516	0.316142	-0.18148	0.327293	-0.270206	0.289923	28.0648	0.015	0.015	-0.245493	-0.0825492	0.393384	0.0141	0.0811046	28.1254	0.401378	0.370246	1.11147	1	-0.104535
2022	BBC	Tiêu dùng thiết yếu	0.0001	0.983	0	-0.417378	0.417378	0.1106	0.1645	0.795282	-0.113669	-0.0825492	-0.0494077	0.327293	0.401378	28.1254	0.01	0.010	0.0963077	0.318071	0.400971	0.1106	-0.0127262	28.2464	0.26322	0.355283	1.47045	1	0.477915
2023	BBC	Tiêu dùng thiết yếu	0.0001	0.983	0	-0.44592	0.44592	0.046	0.0693	0.80413	0.00505467	0.318071	0.046945	-0.0494077	0.26322	28.2464	0.076	0.076	0.002855	-0.0675393	0.322465	0.046	0.0124453	28.4759	0.393273	0.25633	1.37968	1	-0.0774949
2024	BBC	Tiêu dùng thiết yếu	0.0001	0.983	0	-0.547146	0.547146	0.0514	0.0799	0.776866	0.0522979	-0.0675393	0.120312	0.046945	0.393273	28.4759	0.106	0.106	-0.0675115	0.124844	0.231993	0.0514	0.0335147	28.4151	0.31714	0.246536	1.72231	1	0.195343
2020	BCG	Công nghiệp	0.3292	0.4651	0	0.422528	0.422528	0.0135	0.1515	0.991333	0.130167	0.0384672	-0.306838	-0.306838	0.877229	30.8148	0.417	0.417	0.375738	0.0384672	0.0503326	0.0135	-0.306838	30.8148	0.877229	0.0151281	1.06868	0	0.177086
2021	BCG	Công nghiệp	0.36	0.3237	0	0.347106	0.347106	0.0197	0.2365	0.831041	0.0278904	0.0384672	-0.373375	-0.306838	0.877229	30.8148	0	0.000	0.460475	0.0304312	0.241627	0.0197	-0.143543	31.2604	0.778463	0.154742	1.59248	0	0.395976
2022	BCG	Công nghiệp	0.2523	0.2165	0	0.0451539	0.0451539	0.0086	0.0684	0.785899	0.112502	0.0304312	-0.0957468	-0.373375	0.778463	31.2604	0.035	-0.035	0.223347	0.0515195	0.215255	0.0086	-0.0291837	31.4116	0.684663	0.185044	1.56272	0	0.749861
2023	BCG	Công nghiệp	0.2205	0.1563	0	-0.00656705	0.00656705	0.0014	0.0087	0.665466	-0.0073136	0.0515195	-0.00206509	-0.0957468	0.684663	31.4116	0.028	0.028	0.126265	-0.0118386	0.219073	0.0014	-0.000555237	31.3689	0.584194	0.228634	1.6111	0	-0.114547
2024	BCG	Công nghiệp	0.0151	0.2079	0	-0.000402521	0.000402521	0.0091	0.0208	0.660478	0.0217603	-0.0118386	-0.0429963	-0.00206509	0.584194	31.3689	0.012	0.012	0.0580963	0.00856235	0.217732	0.0091	-0.0105195	31.471	0.540147	0.196609	1.67762	0	0.0896521
2020	BCM	Bất động sản	0.0124	0.9544	0.9544	-0.114203	0.114203	0.0432	0.1297	2.0954	0.0337992	-0.0392229	0.0585622	0.0585622	0.662485	31.5252	0.028	0.028	0.0341378	-0.0392229	0.0432032	0.0432	0.0585622	31.5252	0.662485	0.0382765	1.33228	0	-0.207807
2021	BCM	Bất động sản	0.0116	0.9544	0.9544	-0.152684	0.152684	0.0298	0.0903	2.38104	0.0208214	-0.0392229	0.00697662	0.0585622	0.662485	31.5252	0.543	0.543	0.0544234	0.0096736	0.024833	0.0298	0.00184961	31.5228	0.651058	0.0248929	1.5726	0	0.073023
2022	BCM	Bất động sản	0.0114	0.9544	0.9544	-0.0814317	0.0814317	0.0347	0.1019	1.9628	0.0174001	0.0096736	0.0102839	0.00697662	0.651058	31.5228	0.049	0.049	0.0573161	-0.00850193	0.0254224	0.0347	0.00256789	31.5086	0.63224	0.0257871	1.47838	0	-0.059667
2023	BCM	Bất động sản	0.0111	0.9544	0.9544	-0.0609163	0.0609163	0.0476	0.1372	1.95289	0.0201335	-0.00850193	-0.0652233	0.0102839	0.63224	31.5086	0.077	0.077	0.103223	0.0272719	0.0240062	0.0476	-0.0161897	31.6093	0.635502	0.0217062	1.23669	0	0.200662
2024	BCM	Bất động sản	0.0108	0.9544	0.9544	-0.0481667	0.0481667	0.039	0.1089	1.89659	0.0173276	0.0272719	-0.012084	-0.0652233	0.635502	31.6093	0.031	-0.031	0.091484	-0.0494784	0.0198819	0.039	-0.00317299	31.7048	0.648198	0.01807	1.44572	0	-0.335339
2020	BFC	Nguyên vật liệu	0.0031	0.7394	0.65	-0.368325	0.368325	0.0417	0.1403	1.10441	0.0125333	-0.213943	0.134734	0.134734	0.605047	28.7484	0.193	-0.193	-0.105834	-0.213943	0.227772	0.0417	0.134734	28.7484	0.605047	0.248699	1.27382	0	-0.116437
2021	BFC	Nguyên vật liệu	0.0031	0.65	0.65	0.249339	0.249339	0.0635	0.2127	0.903229	0.0226323	-0.213943	-0.085026	0.134734	0.605047	28.7484	0.125	0.125	0.098826	0.76043	0.245619	0.0635	-0.0203229	28.9802	0.646616	0.194802	1.24731	0	0.428984
2022	BFC	Nguyên vật liệu	0.6529	0.65	0.65	-0.193576	0.193576	0.0347	0.13	1.03998	0.0244624	0.76043	-0.0291046	-0.085026	0.646616	28.9802	0.444	0.444	0.0997046	0.217578	0.195281	0.0347	-0.00811569	29.0896	0.683651	0.175044	1.19506	0	0.108302
2023	BFC	Nguyên vật liệu	0.0031	0.7394	0.65	-0.538004	0.538004	0.0382	0.137	1.26161	0.00299936	0.217578	0.192458	-0.0291046	0.683651	29.0896	0.153	-0.153	-0.118758	0.00161664	0.150331	0.0382	0.0507438	28.8707	0.627818	0.187103	1.27048	0	0.00081001
2024	BFC	Nguyên vật liệu	0.0034	0.65	0.65	-0.701291	0.701291	0.1061	0.2547	1.23911	0.0172077	0.00161664	0.288401	0.192458	0.627818	28.8707	0.196	-0.196	-0.217701	0.222869	0.183252	0.1061	0.0642434	28.818	0.537011	0.193167	1.49671	0	0.0896492
2020	BHN	Tiêu dùng thiết yếu	0	0.9913	0.8179	-0.413961	0.413961	0.0849	0.1363	1.94289	0.0181272	-0.242225	0.0660114	0.0660114	0.253582	29.6702	0.249	-0.249	-0.0170114	-0.242225	0.328868	0.0849	0.0660114	29.6702	0.253582	0.332638	2.57748	0	-0.201668
2021	BHN	Tiêu dùng thiết yếu	0	0.9913	0.8179	-0.413175	0.413175	0.0429	0.0688	1.78955	0.0105402	-0.242225	0.094207	0.0660114	0.253582	29.6702	0.07	0.070	-0.037707	-0.0653367	0.284345	0.0429	0.0234175	29.5894	0.317852	0.308269	2.06266	0	-0.0673662
2022	BHN	Tiêu dùng thiết yếu	0	0.9913	0.8179	-0.615594	0.615594	0.0682	0.1114	1.53413	0.0102185	-0.0653367	0.146478	0.094207	0.317852	29.5894	0.125	0.125	-0.103178	0.204752	0.259648	0.0682	0.0351411	29.6128	0.265777	0.253647	2.67999	0	0.208794
2023	BHN	Tiêu dùng thiết yếu	0	0.9913	0.8179	-0.454658	0.454658	0.0467	0.0725	1.48964	0.0135735	0.204752	0.0664754	0.146478	0.265777	29.6128	0.331	-0.331	-0.0527754	-0.089232	0.210487	0.0467	0.0168131	29.5981	0.257689	0.213591	2.975	0	-0.0770571
2024	BHN	Tiêu dùng thiết yếu	0	0.9913	0.8179	-0.599778	0.599778	0.0515	0.0701	1.48953	0.0143025	-0.089232	0.132134	0.0664754	0.257689	29.5981	0.04	0.040	-0.124634	0.0649036	0.167033	0.0515	0.0327916	29.6133	0.274523	0.16452	2.86277	0	0.059845
2020	BKG	Nguyên vật liệu	0.3875	0.3375	0	-0.0232954	0.0232954	0.0463	0.0553	0.879473	0.0589652	-0.150361	0.0639304	0.0639304	0.162454	26.8342	0.07	-0.070	-0.0132304	-0.150361	0.102563	0.0463	0.0639304	26.8342	0.162454	0.092975	4.86826	0	-0.145348
2021	BKG	Nguyên vật liệu	0.3406	0.3375	0	-0.0955178	0.0955178	0.0506	0.0606	0.384538	0.0355854	-0.150361	0.0812664	0.0639304	0.162454	26.8342	0.537	0.537	-0.00526641	0.0121255	0.127027	0.0506	0.0213128	26.8617	0.13452	0.123581	5.56598	0	0.0151291
2022	BKG	Nguyên vật liệu	0.3371	0.3355	0	0.405868	0.405868	0.0374	0.0466	0.381873	0.116757	0.0121255	-0.388969	0.0812664	0.13452	26.8617	0.075	-0.075	0.461369	0.0393989	0.131073	0.0374	-0.0985798	27.5523	0.0572226	0.0657022	15.313	0	0.0497763
2023	BKG	Nguyên vật liệu	0.3363	0.3355	0	-0.190328	0.190328	0.0115	0.0146	0.278766	0.128221	0.0393989	0.208361	-0.388969	0.0572226	27.5523	0.121	0.121	-0.182061	-0.215149	0.0611149	0.0115	0.0693953	27.5426	0.0366359	0.061709	20.9711	0	-0.516552
2024	BKG	Nguyên vật liệu	0.3363	0.3355	0	0.0733079	0.0733079	0.017	0.0178	0.351001	0.0428797	-0.215149	-0.0548871	0.208361	0.0366359	27.5426	0.161	0.161	0.0975871	0.112086	0.0547992	0.017	-0.0136554	27.4038	0.0561915	0.0629641	10.0103	0	0.551284
2020	BMC	Nguyên vật liệu	0.0101	0.4751	0.4751	-0.267283	0.267283	0.0662	0.0739	1.33514	0.035087	0.157156	-0.0620169	-0.0620169	0.115441	26.1553	0.079	-0.079	0.0636169	0.157156	0.191989	0.0662	-0.0620169	26.1553	0.115441	0.185618	6.55134	0	0.181854
2021	BMC	Nguyên vật liệu	0.0101	0.4751	0.4751	-0.437288	0.437288	0.0739	0.085	0.812069	0.015733	0.157156	0.350698	-0.0620169	0.115441	26.1553	0.212	-0.212	-0.235398	-0.386231	0.148395	0.0739	0.0891538	26.2184	0.145391	0.139313	5.33129	0	-0.391138
2022	BMC	Nguyên vật liệu	0.0097	0.4751	0.4751	-0.545001	0.545001	0.0884	0.1002	1.03318	0.0193637	-0.386231	0.239459	0.350698	0.145391	26.2184	0.271	-0.271	-0.0168594	0.187388	0.112963	0.0884	0.0617545	26.2001	0.0898362	0.11505	8.8465	0	0.331996
2023	BMC	Nguyên vật liệu	0.0049	0.463	0.463	-0.0602259	0.0602259	0.0988	0.1085	1.07052	0.0315951	0.187388	-0.0462245	0.239459	0.0898362	26.2001	0.051	-0.051	0.0949245	-0.0131077	0.117047	0.0988	-0.0114503	26.2478	0.0895906	0.111593	8.96408	0	-0.0171184
2024	BMC	Nguyên vật liệu	0.0045	0.3994	0	-0.159089	0.159089	0.1006	0.1098	1.09608	0.0218649	-0.0131077	0.0247318	-0.0462245	0.0895906	26.2478	0.27	-0.270	0.0134682	0.0613205	0.0992389	0.1006	0.00633043	26.2725	0.0787687	0.0968225	10.4241	0	0.0854596
2020	BMP	Công nghiệp	0.008	0.5962	0	-0.825175	0.825175	0.178	0.2115	1.69351	-0.424791	0.122215	0.322319	0.322319	0.182358	28.7372	0.022	-0.022	-0.292819	0.122215	0.174683	0.178	0.322319	28.7372	0.182358	0.164694	4.03403	1	0.0803029
2021	BMP	Công nghiệp	0.0077	0.649	0	-0.120457	0.120457	0.0732	0.09	1.93984	0.052711	0.122215	-0.0101527	0.322319	0.182358	28.7372	0.002	0.002	0.0250527	-0.0439613	0.126373	0.0732	-0.00261288	28.6741	0.191875	0.134599	3.8417	1	-0.0283598
2022	BMP	Công nghiệp	0.0077	0.6531	0	-0.931973	0.931973	0.236	0.2825	3.06423	0.0245958	-0.0439613	0.281584	-0.0101527	0.191875	28.6741	0.203	0.203	-0.267284	0.442417	0.129578	0.236	0.0681771	28.7445	0.139081	0.120779	5.4902	1	0.275786
2023	BMP	Công nghiệp	0.0077	0.6601	0	-1.36298	1.36298	0.3305	0.392	3.29217	0.0179252	0.442417	0.52642	0.281584	0.139081	28.7445	0.089	-0.089	-0.51922	-0.213926	0.0938619	0.3305	0.136231	28.8112	0.173663	0.0878002	4.74942	1	-0.112142
2024	BMP	Công nghiệp	0.0077	0.7409	0	-0.91024	0.91024	0.307	0.3675	3.50907	-0.00745055	-0.213926	0.276668	0.52642	0.173663	28.8112	0.255	0.255	-0.275268	-0.1663	0.0814744	0.307	0.071475	28.7943	0.15585	0.0828619	5.39733	1	-0.104966
2020	BRC	Tiêu dùng không thiết yếu	0.0016	0.8739	0.8739	-0.212022	0.212022	0.075	0.1029	0.960048	0.0107891	0.0697495	-0.0232661	-0.0232661	0.297287	26.4071	0.002	0.002	0.0239661	0.0697495	0.318073	0.075	-0.0232661	26.4071	0.297287	0.290929	2.04547	0	0.069511
2021	BRC	Tiêu dùng không thiết yếu	0.0016	0.8739	0.8739	-0.368012	0.368012	0.0717	0.1038	0.717229	0.0445815	0.0697495	0.0483219	-0.0232661	0.297287	26.4071	0.023	-0.023	-0.0444219	0.202009	0.276429	0.0717	0.0126189	26.4642	0.320564	0.261096	2.01564	0	0.205796
2022	BRC	Tiêu dùng không thiết yếu	0.0016	0.8739	0.8739	-0.294039	0.294039	0.06	0.0883	0.824167	0.0212071	0.202009	0.0537033	0.0483219	0.320564	26.4642	0.022	-0.022	-0.0452033	-0.0321795	0.23439	0.06	0.0138088	26.4574	0.319933	0.235998	2.1063	0	-0.0287843
2023	BRC	Tiêu dùng không thiết yếu	0.0016	0.8739	0.8739	-0.40537	0.40537	0.0648	0.0925	0.872068	0.0180192	-0.0321795	0.129392	0.0537033	0.319933	26.4574	0.144	0.144	-0.106292	-0.0188037	0.209732	0.0648	0.0322373	26.3952	0.278036	0.223172	2.44029	0	-0.0172003
2024	BRC	Tiêu dùng không thiết yếu	0.0017	0.8738	0.4885	-0.37458	0.37458	0.0725	0.103	0.888777	0.0229069	-0.0188037	0.0786644	0.129392	0.278036	26.3952	0.043	0.043	-0.0663644	0.298721	0.192983	0.0725	0.0190556	26.4569	0.312239	0.181447	2.32725	0	0.261288
2020	BTP	Dịch vụ tiện ích	0	0.7956	0.7956	-0.138277	0.138277	0.0437	0.0661	0.89658	0.00487002	-0.573049	0.156385	0.156385	0.284492	28.1673	0.171	0.171	-0.109785	-0.573049	0.134988	0.0437	0.156385	28.1673	0.284492	0.157721	5.46977	1	-0.604091
2021	BTP	Dịch vụ tiện ích	0	0.8764	0.7956	0.0377009	0.0377009	0.0703	0.1018	0.78351	0.0321548	-0.573049	-0.0577484	0.156385	0.284492	28.1673	0.002	0.002	0.112248	0.270672	0.156709	0.0703	-0.0133159	28.2778	0.332091	0.140311	2.55156	1	0.616828
2022	BTP	Dịch vụ tiện ích	0.0001	0.8764	0.7956	0.0314817	0.0314817	0.0403	0.0562	0.841164	0.0404985	0.270672	0.000726183	-0.0577484	0.332091	28.2778	0.003	-0.003	0.0372738	-0.366309	0.170015	0.0403	0.000191569	28.1007	0.222846	0.202963	4.91416	1	-0.576644
2023	BTP	Dịch vụ tiện ích	0.0001	0.7956	0.7956	-0.0129003	0.0129003	0.047	0.0588	0.660836	0.0775029	-0.366309	0.0549508	0.000726183	0.222846	28.1007	0.044	-0.044	-0.0306508	0.166518	0.181809	0.047	0.0125241	28.0077	0.175259	0.199523	5.97524	1	0.518665
2024	BTP	Dịch vụ tiện ích	0	0.8749	0.7956	-0.0468807	0.0468807	0.0314	0.0378	0.734368	0.0525091	0.166518	0.058347	0.0549508	0.175259	28.0077	0.115	-0.115	-0.044147	-0.28984	0.15913	0.0314	0.0139092	27.8713	0.163577	0.18238	4.46694	1	-0.541681
2020	BTT	Tiêu dùng không thiết yếu	0.011	0.4139	0.4139	-0.166147	0.166147	0.0322	0.0461	1.57375	0.0593661	-0.283264	0.0220933	0.0220933	0.264831	26.928	0.071	-0.071	0.0061067	-0.283264	0.459413	0.0322	0.0220933	26.928	0.264831	0.497069	2.74942	0	-0.475758
2021	BTT	Tiêu dùng không thiết yếu	0.009	0.4139	0.4139	-0.0703687	0.0703687	0.0097	0.0131	1.21531	0.0306767	-0.283264	-0.0027703	0.0220933	0.264831	26.928	0.181	-0.181	0.0047703	-0.129151	0.475185	0.0097	-0.000665309	26.861	0.226894	0.50808	5.35536	0	-0.382426
2022	BTT	Tiêu dùng không thiết yếu	0.0047	0.4139	0.4139	-0.317047	0.317047	0.0385	0.0505	1.08406	0.0168178	-0.129151	0.0830919	-0.0027703	0.226894	26.861	0.121	-0.121	-0.0759919	0.128524	0.494892	0.0385	0.020078	26.8778	0.223909	0.486657	4.89699	0	0.576333
2023	BTT	Tiêu dùng không thiết yếu	0	0.4139	0.4139	-0.421612	0.421612	0.1011	0.1331	1.16653	0.000584027	0.128524	0.1063	0.0830919	0.223909	26.8778	0.02	-0.020	-0.0717998	0.147972	0.471583	0.1011	0.0267979	26.9545	0.237086	0.436776	3.66877	0	0.428065
2024	BTT	Tiêu dùng không thiết yếu	0.0004	0.4117	0.4117	-0.395101	0.395101	0.0924	0.1205	1.31084	0.0446642	0.147972	0.0809171	0.1063	0.237086	26.9545	0.019	0.019	0.0110829	0.0867169	0.486364	0.0924	0.0210044	26.949	0.229402	0.489051	3.95286	0	0.189664
2020	BWE	Dịch vụ tiện ích	0.0621	0.699	0.25	-0.40086	0.40086	0.0741	0.1921	1.59272	0.295294	0.0772714	0.185256	0.185256	0.586536	29.7407	0.069	0.069	-0.0817565	0.0772714	0.431544	0.0741	0.185256	29.7407	0.586536	0.324867	1.23726	0	0.188422
2021	BWE	Dịch vụ tiện ích	0.0642	0.6308	0.1944	-0.279485	0.279485	0.0864	0.2064	1.56242	0.110628	0.0772714	0.108203	0.185256	0.586536	29.7407	0.117	-0.117	-0.0727029	0.0113427	0.394501	0.0864	0.0308657	29.8364	0.567401	0.358502	1.354	0	0.0309155
2022	BWE	Dịch vụ tiện ích	0.0668	0.6308	0.1944	-0.320269	0.320269	0.0779	0.1775	1.35597	0.161836	0.0113427	0.143621	0.108203	0.567401	29.8364	0.033	-0.033	-0.121121	0.0402122	0.398579	0.0779	0.0376218	29.9323	0.545639	0.362125	1.40079	0	0.116991
2023	BWE	Dịch vụ tiện ích	0.0579	0.6308	0.1944	-0.267145	0.267145	0.061	0.1451	1.32738	0.193652	0.0402122	0.107179	0.143621	0.545639	29.9323	0.084	-0.084	-0.0710792	0.00422432	0.454335	0.061	0.0280788	30.126	0.590507	0.374334	1.13463	0	0.0121104
2024	BWE	Dịch vụ tiện ích	0.0761	0.5686	0.1944	-0.200455	0.200455	0.0485	0.122	1.34747	0.141793	0.00422432	0.061462	0.107179	0.590507	30.126	0.079	-0.079	-0.021962	0.0357261	0.409146	0.0485	0.0168489	30.2842	0.611767	0.349276	1.31656	0	0.122822
2020	C32	Nguyên vật liệu	0.0233	0.1921	0	-0.167475	0.167475	0.0888	0.1568	0.917435	0.0522314	-0.183008	0.0666248	0.0666248	0.436135	27.6066	0.043	-0.043	0.0107752	-0.183008	0.220232	0.0888	0.0666248	27.6066	0.436135	0.202104	1.277	0	-0.204327
2021	C32	Nguyên vật liệu	0.0233	0.0507	0	-0.0302482	0.0302482	0.0773	0.1332	0.698808	-0.0937618	-0.183008	-0.0137351	0.0666248	0.436135	27.6066	0.064	-0.064	0.120135	-0.12535	0.197772	0.0773	-0.00358117	27.6037	0.399915	0.198351	1.54346	0	-0.191669
2022	C32	Nguyên vật liệu	0.0177	0.1355	0	0.0659423	0.0659423	0.0207	0.0351	0.671737	0.0192574	-0.12535	-0.107931	-0.0137351	0.399915	27.6037	0.079	0.079	0.203031	0.057419	0.174043	0.0207	-0.0269433	27.6414	0.418866	0.167599	1.46797	0	0.108299
2023	C32	Nguyên vật liệu	0.0177	0.3906	0	-0.0201472	0.0201472	-0.0288	-0.0482	0.681717	0.00494527	0.057419	-0.00985404	-0.107931	0.418866	27.6414	0.024	-0.024	0.074754	-0.0768446	0.150091	-0.0288	-0.00250998	27.4854	0.380074	0.175428	1.40785	0	-0.135803
2024	C32	Nguyên vật liệu	0.2574	0.4517	0	-0.14219	0.14219	0.0098	0.0151	0.646077	0.02051	-0.0768446	0.0710555	-0.00985404	0.380074	27.4854	0.164	-0.164	0.0195445	0.153516	0.159952	0.0098	0.0163812	27.3935	0.31063	0.175351	1.19813	0	0.268593
2020	CCI	Năng lượng	0.1068	0.5228	0.3074	-0.0530616	0.0530616	0.0436	0.11	1.2261	0.000679823	-0.136334	0.023471	0.023471	0.602509	27.2641	0.519	0.519	0.047029	-0.136334	0.0287832	0.0436	0.023471	27.2641	0.602509	0.028708	11.3524	0	-0.24498
2021	CCI	Năng lượng	0.1068	0.5228	0.3074	-0.116581	0.116581	0.0471	0.1172	1.32222	0.00443519	-0.136334	0.0699691	0.023471	0.602509	27.2641	0.121	-0.121	0.00163091	0.0126887	0.0287008	0.0471	0.0175152	27.2587	0.593578	0.0288548	15.9908	0	0.0302775
2022	CCI	Năng lượng	0.1068	0.5228	0.3074	-0.280155	0.280155	0.034	0.0915	1.1353	0.039069	0.0126887	0.206517	0.0699691	0.593578	27.2587	0.427	0.427	-0.153817	0.253951	0.0339264	0.034	0.0514912	27.3804	0.659964	0.0300404	15.6455	0	0.585026
2023	CCI	Năng lượng	0.1239	0.5653	0.3074	-0.0591313	0.0591313	0.0322	0.095	1.17825	0.083814	0.253951	0.0228603	0.206517	0.659964	27.3804	0.172	0.172	-0.00516026	-0.0630102	0.0276823	0.0322	0.00606226	27.3871	0.661917	0.0274982	14.0157	0	-0.103427
2024	CCI	Năng lượng	0.1218	0.6411	0.2568	-0.0692573	0.0692573	0.0416	0.1222	1.21322	0.0230517	-0.0630102	0.0315518	0.0228603	0.661917	27.3871	0.073	0.073	0.00014821	-0.00175727	0.025762	0.0416	0.00791427	27.4014	0.657068	0.025396	12.2847	0	-0.00323871
2020	CCL	Bất động sản	0.2426	0.3473	0	-0.00479616	0.00479616	0.0675	0.1263	1.10385	-0.00921185	0.376013	-0.0254702	-0.0254702	0.498348	27.7529	0.205	0.205	-0.13173	0.376013	0.0154888	0.0675	-0.0254702	27.7529	0.498348	0.0128332	1.95351	0	0.665562
2021	CCL	Bất động sản	0.2426	0.3473	0	-0.158883	0.158883	0.0669	0.1355	0.71178	0.00251323	0.376013	0.0348381	-0.0254702	0.498348	27.7529	0.147	-0.147	-0.240338	0.0825864	0.0130771	0.0669	0.00952621	27.8144	0.509329	0.0122973	2.15212	0	0.10593
2022	CCL	Bất động sản	0.2422	0.3473	0	0.0513918	0.0513918	0.0438	0.0917	0.810037	0.00726724	0.0825864	-0.0947755	0.0348381	0.509329	27.8144	0.015	-0.015	-0.0743245	-0.381055	0.0116205	0.0438	-0.024422	27.9392	0.529752	0.0102574	2.24271	0	-0.46997
2023	CCL	Bất động sản	0.2163	0.2947	0	-0.0265349	0.0265349	0.0462	0.0872	0.868645	-0.0263812	-0.381055	-0.0397642	-0.0947755	0.529752	27.9392	0.016	-0.016	-0.0604358	-0.146688	0.00652462	0.0462	-0.0105604	27.7612	0.39788	0.0077953	3.7496	0	-0.38669
2024	CCL	Bất động sản	0.2478	0.4122	0	-0.0710264	0.0710264	0.0373	0.0602	0.835882	-0.00338822	-0.146688	-0.0153833	-0.0397642	0.39788	27.7612	0.161	-0.161	0.145883	-0.0132657	0.0070912	0.0373	-0.00350456	27.7547	0.361487	0.00713795	3.35048	0	-0.0477245
2020	CDC	Công nghiệp	0.1743	0.4295	0	-0.040494	0.040494	0.0331	0.1039	1.00864	-0.00226226	-0.178191	0.0157908	0.0157908	0.697406	27.4418	0.104	0.104	-0.0133908	-0.178191	0.0113424	0.0331	0.0157908	27.4418	0.697406	0.0116617	1.51547	0	-0.319956
2021	CDC	Công nghiệp	0.0823	0.3478	0	0.209214	0.209214	0.0281	0.1123	1.07438	0.0688888	-0.178191	-0.24904	0.0157908	0.697406	27.4418	0.473	0.473	0.16104	0.539854	0.14662	0.0281	-0.0613958	27.8833	0.758303	0.0942843	1.20246	1	1.38639
2022	CDC	Công nghiệp	0.0719	0.3357	0	0.114633	0.114633	0.0032	0.0165	1.07644	0.00130943	0.539854	-0.118658	-0.24904	0.758303	27.8833	0.138	-0.138	0.0505582	0.432153	0.0934094	0.0032	-0.0361091	28.1321	0.805318	0.0728414	1.42204	0	0.723203
2023	CDC	Công nghiệp	0.0259	0.2977	0	0.111697	0.111697	0.005	0.0285	1.016	0.0041225	0.432153	-0.0288503	-0.118658	0.805318	28.1321	0.071	-0.071	0.0600503	-0.0130528	0.0718258	0.005	-0.00810491	28.2221	0.81266	0.065643	1.32626	0	-0.0162556
2024	CDC	Công nghiệp	0.0299	0.2377	0.2377	0.351309	0.351309	0.0126	0.0605	0.959317	0.00590808	-0.0130528	-0.361504	-0.0288503	0.81266	28.2221	0.162	0.162	0.388604	-0.0747177	0.00680508	0.0126	-0.0944407	28.3272	0.772427	0.00612611	1.36552	0	-0.103498
2020	CII	Công nghiệp	0.0442	0.2696	0.1007	-0.0523826	0.0523826	0.0086	0.0512	1.11553	-0.00228494	0.121745	-0.0476568	-0.0476568	0.736501	31.017	0.105	-0.105	0.0689568	0.121745	0.1852	0.0086	-0.0476568	31.017	0.736501	0.183332	1.32124	0	1.96393
2021	CII	Công nghiệp	0.0309	0.0849	0.0849	-0.00347353	0.00347353	-0.011	-0.0691	0.854309	-0.0291665	0.121745	-0.0298391	-0.0476568	0.736501	31.017	0.124	-0.124	0.0424391	-0.0850866	0.318633	-0.011	-0.00749757	31.0608	0.72858	0.304976	1.14617	0	-0.467811
2022	CII	Công nghiệp	0.0292	0.0847	0.0847	-0.178855	0.178855	0.0234	0.1362	0.89382	-0.0183523	-0.0850866	0.0315199	-0.0298391	0.72858	31.0608	0.066	-0.066	-0.0136199	0.0935517	0.27614	0.0234	0.00805254	30.983	0.709343	0.298481	0.755108	0	1.00976
2023	CII	Công nghiệp	0.0232	0.0849	0.0849	-0.0360116	0.0360116	0.0058	0.0305	0.879926	-0.0213266	0.0935517	-0.0399442	0.0315199	0.709343	30.983	0.028	-0.028	0.109944	-0.0930787	0.574248	0.0058	-0.00959779	31.1331	0.743693	0.49422	0.848552	0	-0.462471
2024	CII	Công nghiệp	0.0015	0.0584	0	-0.0225152	0.0225152	0.0074	0.0292	0.872821	0.00260654	-0.0930787	0.0142338	-0.0399442	0.743693	31.1331	0.032	-0.032	-0.00713378	-0.00186737	0.490094	0.0074	0.00382497	31.233	0.751185	0.443488	0.954005	0	-0.0200559
2020	CKG	Bất động sản	0.172	0.083	0	-0.0778531	0.0778531	0.0291	0.2265	1.14687	0.0421171	0.0144207	0.0122435	0.0122435	0.863468	29.1758	0.028	0.028	0.0801565	0.0144207	0.0313223	0.0291	0.0122435	29.1758	0.863468	0.0300093	2.05328	0	0.0616706
2021	CKG	Bất động sản	0.1314	0.0831	0	-0.105605	0.105605	0.0311	0.1911	1.13427	0.0204111	0.0144207	0.0116728	0.0122435	0.863468	29.1758	0.019	-0.019	0.0650272	-0.00245751	0.0300912	0.0311	0.00298067	29.1757	0.793619	0.0300944	1.94091	0	-0.0103322
2022	CKG	Bất động sản	0.1431	0.0831	0	-0.0701946	0.0701946	0.0354	0.1666	1.16638	0.0249425	-0.00245751	-0.0245261	0.0116728	0.793619	29.1757	0.097	-0.097	0.0856261	0.0731044	0.0594119	0.0354	-0.00613121	29.1888	0.760123	0.0586373	2.0798	0	0.310532
2023	CKG	Bất động sản	0.1376	0.1798	0	-0.0454074	0.0454074	0.0303	0.1187	1.1608	0.0121261	0.0731044	-0.0237311	-0.0245261	0.760123	29.1888	0.108	-0.108	0.0734311	-0.0305499	0.0555878	0.0303	-0.0059717	29.1868	0.708521	0.0556961	1.72815	0	-0.100329
2024	CKG	Bất động sản	0.2638	0	0	-0.00664865	0.00664865	0.0252	0.086	1.13586	0.0245053	-0.0305499	-0.0474154	-0.0237311	0.708521	29.1868	0.253	-0.253	0.153715	-0.00132196	0.0628124	0.0252	-0.0118423	29.2414	0.705679	0.0594789	1.87672	0	-0.00481619
2020	CLC	Tiêu dùng thiết yếu	0.0057	0.5738	0.5738	-0.379934	0.379934	0.1332	0.1812	1.25215	0.000285004	-0.028274	0.222157	0.222157	0.198527	27.5385	0.01	0.010	-0.0938574	-0.028274	0.057546	0.1332	0.222157	27.5385	0.198527	0.0646635	4.64892	0	-0.0150168
2021	CLC	Tiêu dùng thiết yếu	0.0011	0.5738	0.5738	-0.0565853	0.0565853	0.1381	0.18	1.07447	-0.00932677	-0.028274	-0.0147323	0.222157	0.198527	27.5385	0.215	-0.215	0.145732	0.265842	0.0349414	0.1381	-0.00346857	27.688	0.26248	0.0300888	3.65803	0	0.127568
2022	CLC	Tiêu dùng thiết yếu	0.0013	0.5738	0.5738	0.157368	0.157368	0.1153	0.1739	1.1265	0.0378693	0.265842	-0.0894921	-0.0147323	0.26248	27.688	0.06	0.060	0.122592	0.153756	0.0355786	0.1153	-0.0240425	27.9568	0.392367	0.0271928	2.46975	1	0.0759876
2023	CLC	Tiêu dùng thiết yếu	0.007	0.5738	0.5738	-0.181078	0.181078	0.0951	0.1635	1.33939	0.0299943	0.153756	0.0724758	-0.0894921	0.392367	27.9568	0.004	-0.004	-0.0408758	0.480799	0.0179497	0.0951	0.0205395	28.0801	0.441153	0.0158683	2.10339	0	0.288937
2024	CLC	Tiêu dùng thiết yếu	0.0084	0.5738	0.51	0.0964033	0.0964033	0.0853	0.1683	1.23168	0.019449	0.480799	-0.0835837	0.0724758	0.441153	28.0801	0.065	0.065	0.119784	0.460108	0.0705255	0.0853	-0.022182	28.3016	0.534693	0.0565132	1.79691	0	0.242657
2020	CLL	Công nghiệp	0.0008	0.477	0.477	-0.368567	0.368567	0.1377	0.1559	1.62481	0.0108866	0.0516071	0.224302	0.224302	0.0829818	27.2824	0.087	-0.087	-0.213202	0.0516071	0.439099	0.1377	0.224302	27.2824	0.0829818	0.434618	5.19156	0	0.102929
2021	CLL	Công nghiệp	0.0008	0.477	0.477	-0.257202	0.257202	0.1244	0.1367	1.38751	0.00801467	0.0516071	0.146576	0.224302	0.0829818	27.2824	0.056	-0.056	-0.106576	-0.17283	0.364409	0.1244	0.036832	27.2432	0.0446495	0.378966	11.2033	0	-0.315759
2022	CLL	Công nghiệp	0.0008	0.477	0.477	-0.353359	0.353359	0.1311	0.1432	1.94038	0.0201046	-0.17283	0.17756	0.146576	0.0446495	27.2432	0.043	-0.043	-0.13126	-0.000815828	0.341202	0.1311	0.0435208	27.28	0.0761702	0.328868	7.15183	0	-0.00209467
2023	CLL	Công nghiệp	0.0003	0.546	0.546	-0.325971	0.325971	0.1405	0.1569	1.91922	0.00364743	-0.000815828	0.157739	0.17756	0.0761702	27.28	0.072	-0.072	-0.0983394	0.06046	0.278867	0.1405	0.0401607	27.2381	0.0834996	0.290803	6.84687	0	0.161393
2024	CLL	Công nghiệp	0.0165	0.527	0.527	-0.280499	0.280499	0.1435	0.1568	1.87072	0.0463757	0.06046	0.0826283	0.157739	0.0834996	27.2381	0.139	-0.139	-0.0728283	0.024141	0.256436	0.1435	0.0202242	27.2479	0.0852123	0.25395	7.20567	0	0.0532096
2020	CLW	Dịch vụ tiện ích	0.1913	0.7755	0.51	-0.377254	0.377254	0.0614	0.1255	1.28074	0.0805854	0.261364	0.20811	0.20811	0.541788	26.9211	0.105	-0.105	-0.18231	0.261364	0.488606	0.0614	0.20811	26.9211	0.541788	0.416222	1.01466	0	0.102593
2021	CLW	Dịch vụ tiện ích	0.7235	0.7877	0.51	-0.219313	0.219313	0.0584	0.1229	1.16116	0.0567685	0.261364	0.061625	0.20811	0.541788	26.9211	0.121	-0.121	-0.050825	-0.0449848	0.358262	0.0584	0.0166387	26.8509	0.507429	0.384321	1.21071	0	-0.0187999
2022	CLW	Dịch vụ tiện ích	0.2891	0.7878	0.51	-0.362979	0.362979	0.0625	0.1281	1.47445	0.140842	-0.0449848	0.177243	0.061625	0.507429	26.8509	0.041	0.041	-0.174343	0.21524	0.448288	0.0625	0.0427559	26.9521	0.577325	0.405144	1.28017	0	0.0854599
2023	CLW	Dịch vụ tiện ích	0.2155	0.7437	0.51	-0.501135	0.501135	0.0896	0.2192	1.5586	0.141517	0.21524	0.209379	0.177243	0.577325	26.9521	0.042	0.042	-0.124479	0.101162	0.471997	0.0896	0.054991	27.0798	0.60322	0.415411	1.22673	0	0.0409441
2024	CLW	Dịch vụ tiện ích	0.2155	0.8358	0.51	-0.388013	0.388013	0.0935	0.2192	1.51714	0.0851184	0.101162	0.0651983	0.209379	0.60322	27.0798	0.064	-0.064	0.0195017	-0.00167228	0.49898	0.0935	0.0173389	27.0693	0.551657	0.504257	1.11993	0	-0.000738782
2020	CMV	Tiêu dùng không thiết yếu	0.0528	0.7526	0	-0.033175	0.033175	0.0258	0.0949	0.93421	0.00281425	-0.690876	0.0625773	0.0625773	0.673407	27.1296	0.444	0.444	-0.0342773	-0.690876	0.129038	0.0258	0.0625773	27.1296	0.673407	0.156259	1.20001	0	-0.107153
2021	CMV	Tiêu dùng không thiết yếu	0.0472	0.6717	0	-0.0724891	0.0724891	0.0512	0.1276	0.827845	0.00513845	-0.690876	0.164199	0.0625773	0.673407	27.1296	0.098	-0.098	-0.141699	-0.595338	0.148118	0.0512	0.037133	26.8821	0.468839	0.189717	1.6286	0	-0.0854006
2022	CMV	Tiêu dùng không thiết yếu	0.0428	0.6717	0	0.0509595	0.0509595	0.0487	0.0965	0.814377	0.00282846	-0.595338	0.0444957	0.164199	0.468839	26.8821	0.043	-0.043	-0.0214957	1.40207	0.17631	0.0487	0.00975421	26.9149	0.487406	0.170613	1.59308	0	0.171688
2023	CMV	Tiêu dùng không thiết yếu	0.0428	0.6717	0.1617	0.36532	0.36532	0.0327	0.0693	0.850028	0.0213638	1.40207	-0.0802208	0.0444957	0.487406	26.9149	0.205	0.205	0.107521	-0.539945	0.17481	0.0327	-0.0203845	26.9979	0.538835	0.16089	1.46187	0	-0.0583139
2024	CMV	Tiêu dùng không thiết yếu	0.0428	0.6717	0.1617	0.0555901	0.0555901	0.0222	0.0467	0.817447	0.0114852	-0.539945	0.0453439	-0.0802208	0.538835	26.9979	0.036	0.036	-0.0208439	0.656094	0.167801	0.0222	0.011806	26.9431	0.510396	0.177255	1.5057	0	0.0817561
2020	CMX	Tiêu dùng thiết yếu	0.1048	0.4125	0	-0.0934435	0.0934435	0.0322	0.1794	0.944182	0.0929994	0.33253	-0.00900347	-0.00900347	0.626378	28.0316	0.165	-0.165	0.0256035	0.33253	0.239918	0.0322	-0.00900347	28.0316	0.626378	0.228848	1.03003	0	0.497781
2021	CMX	Tiêu dùng thiết yếu	0.2477	0.5256	0	0.21389	0.21389	0.0348	0.0947	0.775652	0.169495	0.33253	-0.239471	-0.00900347	0.626378	28.0316	0.082	0.082	0.256271	0.44823	0.223979	0.0348	-0.0612814	28.5154	0.464749	0.138061	1.92914	0	0.46965
2022	CMX	Tiêu dùng thiết yếu	0.2212	0.4444	0	-0.0262231	0.0262231	0.0247	0.0588	0.820944	0.0500911	0.44823	-0.0685436	-0.239471	0.464749	28.5154	0.001	-0.001	0.0794436	0.333031	0.154315	0.0247	-0.0212025	28.7006	0.521264	0.128237	1.44166	0	0.385195
2023	CMX	Tiêu dùng thiết yếu	0.2212	0.6961	0	0.115934	0.115934	0.0154	0.0426	0.798827	0.117213	0.333031	-0.0418546	-0.0685436	0.521264	28.7006	0.161	-0.161	0.0497546	-0.29513	0.16676	0.0154	-0.0114294	28.8623	0.563842	0.14185	1.33594	0	-0.296547
2024	CMX	Tiêu dùng thiết yếu	0.2204	0.5372	0	-0.019185	0.019185	0.0157	0.0355	0.76822	0.0503904	-0.29513	-0.0164072	-0.0418546	0.563842	28.8623	0.017	0.017	0.0271072	0.274621	0.153064	0.0157	-0.00443289	28.9438	0.552443	0.141088	2.16042	0	0.46115
2020	CNG	Dịch vụ tiện ích	0	0.6559	0.0959	-0.208976	0.208976	0.0536	0.097	1.26488	0.0250996	0.247427	0.16934	0.16934	0.521142	27.6928	0.006	-0.006	-0.16494	0.247427	0.164077	0.0536	0.16934	27.6928	0.521142	0.129364	1.68238	1	0.0974018
2021	CNG	Dịch vụ tiện ích	0	0.56	0	-0.178057	0.178057	0.0753	0.1596	1.15576	0.204684	0.247427	0.121137	0.16934	0.521142	27.6928	0.02	-0.020	-0.116637	0.676753	0.214607	0.0753	0.0338668	27.7467	0.535248	0.203341	1.43311	1	0.307907
2022	CNG	Dịch vụ tiện ích	0	0.56	0	-0.28631	0.28631	0.0982	0.216	1.14602	0.0362406	0.676753	0.167718	0.121137	0.535248	27.7467	0.234	-0.234	-0.0846177	1.0045	0.187458	0.0982	0.0430597	27.8726	0.554397	0.165277	1.61878	1	0.368793
2023	CNG	Dịch vụ tiện ích	0	0.56	0	-0.0295649	0.0295649	0.0907	0.1885	1.4084	0.0428622	1.0045	0.0376672	0.167718	0.554397	27.8726	0.043	0.043	0.0262328	-0.843026	0.125786	0.0907	0.010009	27.7782	0.479849	0.13824	1.8161	1	-0.256464
2024	CNG	Dịch vụ tiện ích	0	0.56	0.56	-0.228193	0.228193	0.0721	0.1475	1.3347	0.0609668	-0.843026	0.092072	0.0376672	0.479849	27.7782	0.018	0.018	-0.055072	0.349664	0.181338	0.0721	0.0219323	27.9427	0.538002	0.153833	1.57539	1	0.130177
2020	COM	Năng lượng	0.1768	0.8444	0.8444	-0.0773986	0.0773986	0.0731	0.0835	1.37538	0.00410971	-2.53112	0.177517	0.177517	0.11229	26.9351	0.018	0.018	-0.0722174	-2.53112	0.488277	0.0731	0.177517	26.9351	0.11229	0.504641	4.33174	0	-0.310285
2021	COM	Năng lượng	0.1754	0.8444	0.8444	-0.0648244	0.0648244	0.0778	0.0879	0.957929	0.00916004	-2.53112	0.0591001	0.177517	0.11229	26.9351	0.006	0.006	0.1036	-0.480564	0.483807	0.0778	0.0145315	27.0057	0.117445	0.450808	4.67975	0	-0.0826443
2022	COM	Năng lượng	0.0176	0.8444	0.8444	-0.0828483	0.0828483	0.0024	0.0028	1.10369	-0.00791247	-0.480564	0.0418164	0.0591001	0.117445	27.0057	0.016	0.016	0.0334836	4.02907	0.436241	0.0024	0.0108232	26.9886	0.173566	0.443754	3.03193	0	0.810604
2023	COM	Năng lượng	0.0176	0.8444	0.8444	0.044136	0.044136	0.0678	0.0789	0.925037	0.0152694	4.02907	0.0975862	0.0418164	0.173566	26.9886	0.014	-0.014	-0.0197862	-0.899727	0.443414	0.0678	0.0241883	26.9181	0.104063	0.475837	3.91857	0	-0.0982825
2024	COM	Năng lượng	0.0125	0.8444	0.4479	0.150297	0.150297	0.0551	0.0615	0.957605	0.0195168	-0.899727	0.00961826	0.0975862	0.104063	26.9181	0.064	-0.064	0.119182	-0.481021	0.470653	0.0551	0.00231975	26.9069	0.104135	0.475924	4.07053	0	-0.0543012
2020	CRC	Công nghiệp	0.1437	0.1	0	-0.185051	0.185051	0.0095	0.028	0.953957	0.148783	0.433014	0.517158	0.517158	0.714214	27.1621	0.144	0.144	-0.324358	0.433014	0.0852177	0.0095	0.517158	27.1621	0.714214	0.0551215	1.20917	0	0.433049
2021	CRC	Công nghiệp	0.0885	0.0667	0	0.058171	0.058171	0.0352	0.0855	0.722966	0.252857	0.433014	-0.187861	0.517158	0.714214	27.1621	0.102	-0.102	0.356561	-0.33696	0.446789	0.0352	-0.0570372	27.1881	0.455733	0.435332	1.65609	0	-0.363547
2022	CRC	Công nghiệp	0.0885	0.0667	0	-0.0881723	0.0881723	0.0373	0.0674	0.717186	0.0360679	-0.33696	-0.000271972	-0.187861	0.455733	27.1881	0.1	-0.100	0.104372	0.0819885	0.427151	0.0373	-6.88761e-05	27.194	0.42182	0.424611	1.62759	0	0.142643
2023	CRC	Công nghiệp	0.0885	0.0667	0	-0.172974	0.172974	0.0446	0.0753	0.693385	0.00304139	0.0819885	0.153294	-0.000271972	0.42182	27.194	0.059	-0.059	-0.124494	-0.10438	0.411079	0.0446	0.0384377	27.1971	0.379025	0.409807	1.60257	0	-0.15988
2024	CRC	Công nghiệp	0.0885	0.0667	0	0.0612253	0.0612253	0.0684	0.1042	0.659999	0.0687753	-0.10438	-0.0201192	0.153294	0.379025	27.1971	0.022	0.022	0.0374192	0.170305	0.62763	0.0684	-0.00503759	27.8257	0.32467	0.334748	2.316	0	0.311465
2020	CRE	Bất động sản	0.0322	0.6246	0	-0.0940369	0.0940369	0.0905	0.1527	1.15631	0.0242479	-0.0726948	-0.171991	-0.171991	0.463589	28.9689	0.207	-0.207	0.194891	-0.0726948	0.0841606	0.0905	-0.171991	28.9689	0.463589	0.0592177	1.57952	0	-0.0842992
2021	CRE	Bất động sản	0.556	0.6084	0	-0.140273	0.140273	0.0909	0.1688	0.727854	0.013939	-0.0726948	-0.0986828	-0.171991	0.463589	28.9689	0.004	0.004	0.180883	0.913154	0.0616209	0.0909	-0.0289625	29.4669	0.451698	0.0374495	2.17242	0	1.64349
2022	CRE	Bất động sản	0.0554	0.6084	0	0.228958	0.228958	0.0282	0.0437	0.794889	0.0047268	0.913154	-0.37703	-0.0986828	0.451698	29.4669	0.135	-0.135	0.48583	-0.338369	0.0341172	0.0282	-0.117255	29.6614	0.262854	0.0280875	2.55735	0	-0.379069
2023	CRE	Bất động sản	0.0543	0.6084	0	0.0213474	0.0213474	0.0003	0.0004	0.679948	0.00486634	-0.338369	-0.00206823	-0.37703	0.262854	29.6614	0.095	-0.095	0.0717682	-0.33372	0.0274164	0.0003	-0.000567178	29.5913	0.208518	0.0294077	4.41742	0	-0.731351
2024	CRE	Bất động sản	0.0539	0.6084	0	0.00585934	0.00585934	0.0057	0.0073	0.715221	0.00860504	-0.33372	-0.0830914	-0.00206823	0.208518	29.5913	0.135	-0.135	0.137991	0.0850909	0.0260739	0.0057	-0.0200449	29.6024	0.211553	0.0257854	2.97203	0	0.647127
2020	CSM	Tiêu dùng không thiết yếu	0.0034	0.51	0.51	-0.267186	0.267186	0.0238	0.0721	1.14381	0.02502	0.111855	0.0829608	0.0829608	0.665522	28.9695	0.002	-0.002	0.0702392	0.111855	0.385404	0.0238	0.0829608	28.9695	0.665522	0.385684	1.03475	0	0.100076
2021	CSM	Tiêu dùng không thiết yếu	0.003	0.6	0.51	0.0280076	0.0280076	0.0105	0.0325	1.05407	0.0058033	0.111855	-0.0711803	0.0829608	0.665522	28.9695	0.092	-0.092	0.24888	0.0386739	0.33581	0.0105	-0.0177886	29.0549	0.697277	0.308314	1.05248	0	0.0314306
2022	CSM	Tiêu dùng không thiết yếu	0.0028	0.593	0.5101	-0.0657821	0.0657821	0.0188	0.0607	0.986224	0.0107975	0.0386739	0.0101207	-0.0711803	0.697277	29.0549	0.014	-0.014	0.139579	0.115841	0.26424	0.0188	0.00263817	29.0671	0.690447	0.261039	1.09492	0	0.099416
2023	CSM	Tiêu dùng không thiết yếu	0.0028	0.593	0.5101	-0.383124	0.383124	0.0149	0.046	1.03659	0.010964	0.115841	0.146765	0.0101207	0.690447	29.0671	0.025	-0.025	0.00233544	-0.0203902	0.225177	0.0149	0.0369147	28.988	0.659089	0.243724	1.16442	0	-0.0161118
2024	CSM	Tiêu dùng không thiết yếu	0	0.5897	0.51	-0.27464	0.27464	0.0187	0.0537	1.06312	0.0192529	-0.0203902	0.0899593	0.146765	0.659089	28.988	0.006	-0.006	0.154741	-0.134575	0.212082	0.0187	0.0216003	28.97	0.643487	0.21592	1.21938	0	-0.0998549
2020	CSV	Nguyên vật liệu	0.0003	0.7409	0.65	-0.537231	0.537231	0.1394	0.1895	1.46531	0.0395361	-0.179736	0.229564	0.229564	0.226816	27.8927	0.001	0.001	-0.0815644	-0.179736	0.0996568	0.1394	0.229564	27.8927	0.226816	0.0970437	3.21512	0	-0.145163
2021	CSV	Nguyên vật liệu	0.0002	0.65	0.65	-0.351056	0.351056	0.1519	0.199	1.16887	0.043869	-0.179736	0.109226	0.229564	0.226816	27.8927	0.346	0.346	-0.0261259	0.183102	0.100739	0.1519	0.0276692	28.0066	0.203409	0.0898901	3.15985	0	0.177652
2022	CSV	Nguyên vật liệu	0.0002	0.65	0.65	-0.601606	0.601606	0.2233	0.2864	1.55485	0.0184146	0.183102	0.170366	0.109226	0.203409	28.0066	0.002	0.002	-0.113066	0.362321	0.0844134	0.2233	0.0450154	28.1724	0.16847	0.0715149	4.3107	0	0.334534
2023	CSV	Nguyên vật liệu	0.0002	0.65	0.65	-0.408081	0.408081	0.1216	0.1527	1.22347	0.0104328	0.362321	0.190879	0.170366	0.16847	28.1724	0.002	-0.002	-0.126979	-0.300166	0.0456476	0.1216	0.0516673	28.1745	0.165932	0.0455539	4.56248	0	-0.245128
2024	CSV	Nguyên vật liệu	0	0.65	0.65	-0.468588	0.468588	0.1333	0.1596	2.88049	0.0270757	-0.300166	0.1344	0.190879	0.165932	28.1745	0.033	-0.033	-0.0994005	0.155136	0.0364017	0.1333	0.0336347	28.2511	0.164057	0.0337183	4.80041	0	0.168176
2020	CTF	Tiêu dùng không thiết yếu	0.1841	0.3597	0	-0.169081	0.169081	0.0006	0.002	1.2455	0.0254318	-0.458534	0.0781425	0.0781425	0.662802	28.0876	0.107	0.107	-0.0541425	-0.458534	0.103982	0.0006	0.0781425	28.0876	0.662802	0.101889	1.11374	0	-0.111645
2021	CTF	Tiêu dùng không thiết yếu	0.1827	0.3472	0	0.126495	0.126495	0.0294	0.0763	1.80268	0.0112097	-0.458534	-0.095257	0.0781425	0.662802	28.0876	0.129	0.129	0.139057	-0.719157	0.101004	0.0294	-0.0240563	28.1975	0.539281	0.0904916	1.35427	0	-0.201156
2022	CTF	Tiêu dùng không thiết yếu	0.1826	0.3472	0	0.0958965	0.0958965	0.0521	0.1333	1.55467	0.0512914	-0.719157	-0.308316	-0.095257	0.539281	28.1975	0.305	0.305	0.365016	1.02029	0.0983838	0.0521	-0.0813102	28.5579	0.63405	0.0686118	1.17682	0	0.398752
2023	CTF	Tiêu dùng không thiết yếu	0.1553	0.342	0	0.220326	0.220326	0.0133	0.0435	1.23168	0.135603	1.02029	-0.25478	-0.308316	0.63405	28.5579	0.033	0.033	0.15738	0.314342	0.0751309	0.0133	-0.0750507	28.9278	0.706173	0.051903	1.1674	0	0.12594
2024	CTF	Tiêu dùng không thiết yếu	0.1711	0.3321	0	-0.0236101	0.0236101	0.0123	0.0423	1.25063	0.0249818	0.314342	-0.0520768	-0.25478	0.706173	28.9278	0.249	0.249	0.0637768	0.293453	0.0586879	0.0123	-0.0153997	28.9965	0.713472	0.0547903	1.14994	0	0.151151
2020	CTI	Công nghiệp	0.0936	0.0754	0	-0.127239	0.127239	0.0214	0.0826	1.01439	0.0278916	0.0261219	0.0667272	0.0667272	0.702252	29.142	0.043	-0.043	0.0486728	0.0261219	0.549637	0.0214	0.0667272	29.142	0.702252	0.549081	0.988385	0	0.148433
2021	CTI	Công nghiệp	0.0931	0	0	-0.130247	0.130247	-0.0009	-0.0036	0.910289	0.0867339	0.0261219	0.0569198	0.0667272	0.702252	29.142	0.008	0.008	0.0155802	-0.0344309	0.759918	-0.0009	0.0142372	29.1903	0.736075	0.724103	0.864265	0	-0.170533
2022	CTI	Công nghiệp	0.0778	0.0567	0	-0.163446	0.163446	0.02	0.0775	0.916868	0.0433332	-0.0344309	0.0744548	0.0569198	0.736075	29.1903	0.185	0.185	0.0289452	0.0284126	0.694534	0.02	0.0190629	29.1343	0.701096	0.73453	0.681319	0	0.178048
2023	CTI	Công nghiệp	0.0702	0.0567	0	-0.161017	0.161017	0.017	0.0656	0.949904	0.0299109	0.0284126	0.0739583	0.0744548	0.701096	29.1343	0.029	0.029	-0.0623583	-0.0176975	0.708171	0.017	0.0179721	29.1386	0.68762	0.705144	0.586963	0	-0.089014
2024	CTI	Công nghiệp	0.0778	0.1897	0	-0.125489	0.125489	0.0218	0.0675	0.895358	0.0460872	-0.0176975	0.0666175	0.0739583	0.68762	29.1386	0.061	0.061	0.00418254	0.065815	0.679032	0.0218	0.01669	29.1486	0.66589	0.672239	0.643101	0	0.364939
2020	CVT	Nguyên vật liệu	0.0016	0.0952	0	-0.292316	0.292316	0.0918	0.1649	1.61825	0.120586	-0.130334	0.200877	0.200877	0.452178	27.9631	0.068	0.068	-0.187277	-0.130334	0.438212	0.0918	0.200877	27.9631	0.452178	0.38763	1.34045	0	-0.109467
2021	CVT	Nguyên vật liệu	0.0002	0.5114	0	-0.294766	0.294766	0.0493	0.1222	1.30482	0.199993	-0.130334	0.145054	0.200877	0.452178	27.9631	0.131	-0.131	-0.0557538	0.0973796	0.492726	0.0493	0.0384846	28.518	0.679723	0.282905	1.77319	1	0.103827
2022	CVT	Nguyên vật liệu	0.0001	0.5114	0	-0.0164857	0.0164857	0.0327	0.1151	1.08531	0.106478	0.0973796	-0.0500434	0.145054	0.679723	28.518	0.118	-0.118	0.139943	0.238265	0.374146	0.0327	-0.0158953	28.8467	0.74152	0.269336	1.77225	1	0.400836
2023	CVT	Nguyên vật liệu	0.0001	0.6188	0	-0.0717116	0.0717116	0.0122	0.0456	0.999522	0.0210484	0.238265	-0.0185412	-0.0500434	0.74152	28.8467	0.139	-0.139	0.0875412	-0.0562613	0.23654	0.0122	-0.0053903	28.8285	0.724757	0.240883	1.71612	1	-0.0938591
2024	CVT	Nguyên vật liệu	0.0001	0.5114	0	-0.113002	0.113002	0.018	0.0636	0.987884	0.0436307	-0.0562613	0.0805255	-0.0185412	0.724757	28.8285	0.115	-0.115	-0.0776255	-0.0362207	0.205653	0.018	0.0199483	28.8354	0.708952	0.204242	1.53919	0	-0.0654828
2020	DAT	Tiêu dùng thiết yếu	0.0439	0.7925	0	0.0392915	0.0392915	0.0323	0.084	1.21381	0.0532316	-0.211625	0.0725319	0.0725319	0.605731	28.1252	0.038	-0.038	-0.0239319	-0.211625	0.195561	0.0323	0.0725319	28.1252	0.605731	0.187947	1.30237	0	-0.133713
2021	DAT	Tiêu dùng thiết yếu	0.0439	0.7925	0	0.0116396	0.0116396	0.0212	0.0521	0.856906	-0.0127586	-0.211625	0.0584494	0.0725319	0.605731	28.1252	0.076	-0.076	-0.0115494	0.0610596	0.156065	0.0212	0.0149024	28.1173	0.579671	0.157304	1.32629	0	0.046339
2022	DAT	Tiêu dùng thiết yếu	0.039	0.7925	0	0.00244553	0.00244553	0.0474	0.1105	0.88955	-0.00448559	0.0610596	0.016049	0.0584494	0.579671	28.1173	0.153	0.153	0.041951	0.451759	0.1669	0.0474	0.00399636	28.1922	0.562784	0.154862	1.36474	0	0.32508
2023	DAT	Tiêu dùng thiết yếu	0.0425	0.7925	0	-0.104613	0.104613	0.0441	0.0937	0.772701	-0.00141948	0.451759	0.175512	0.016049	0.562784	28.1922	0.038	-0.038	-0.118412	-0.0313279	0.135851	0.0441	0.0455197	28.1394	0.493722	0.14321	1.42221	0	-0.0183352
2024	DAT	Tiêu dùng thiết yếu	0.0425	0.7925	0	0.225888	0.225888	0.037	0.0676	0.762918	0.0166111	-0.0313279	-0.0880191	0.175512	0.493722	28.1394	0.198	-0.198	0.222419	-0.000722848	0.11809	0.037	-0.0214245	28.0505	0.407933	0.129072	1.95971	0	-0.000408815
2020	DBC	Tiêu dùng thiết yếu	0.2248	0.2699	0	-0.474032	0.474032	0.1422	0.3872	1.33026	0.0586279	0.295543	0.226135	0.226135	0.583522	29.9437	0.216	-0.216	-0.0459346	0.295543	0.464502	0.1422	0.226135	29.9437	0.583522	0.44108	1.09366	1	0.394451
2021	DBC	Tiêu dùng thiết yếu	0.325	0.2829	0	-0.13622	0.13622	0.0791	0.1866	0.733585	0.025804	0.295543	0.0580494	0.226135	0.583522	29.9437	0.013	-0.013	0.102451	0.0783279	0.453604	0.0791	0.0148877	30.0163	0.568617	0.421814	1.09006	1	0.0789507
2022	DBC	Tiêu dùng thiết yếu	0.2812	0.2416	0	0.00180504	0.00180504	0.0004	0.0011	1.12724	0.0844153	0.0783279	0.0287002	0.0580494	0.568617	30.0163	0.268	-0.268	0.0383998	0.0685658	0.396018	0.0004	0.0074356	30.194	0.64227	0.331565	0.979496	1	0.0688814
2023	DBC	Tiêu dùng thiết yếu	0.2811	0.2416	0	0.0356449	0.0356449	0.0019	0.0054	1.13983	0.0224675	0.0685658	-0.0745562	0.0287002	0.64227	30.194	0.042	-0.042	0.148856	-0.034499	0.396823	0.0019	-0.0202902	30.1969	0.641382	0.395677	0.994348	1	-0.0387273
2024	DBC	Tiêu dùng thiết yếu	0.2783	0.233	0	-0.218586	0.218586	0.0567	0.1345	1.17852	0.0479515	-0.034499	0.0865237	-0.0745562	0.641382	30.1969	0.117	-0.117	-0.0854237	0.189331	0.368113	0.0567	0.0216622	30.2787	0.520869	0.339182	1.22076	1	0.221739
2020	DBD	Chăm sóc sức khỏe	0.0346	0.1334	0.1334	-0.605959	0.605959	0.1032	0.1643	2.17065	0.0263702	-0.00294754	0.13138	0.13138	0.312217	27.9939	0.141	-0.141	0.24882	-0.00294754	0.153418	0.1032	0.13138	27.9939	0.312217	0.172966	2.40274	1	-0.0037858
2021	DBD	Chăm sóc sức khỏe	0.0326	0.1334	0.1334	-0.681015	0.681015	0.1262	0.1776	1.7445	0.0380091	-0.00294754	0.0817914	0.13138	0.312217	27.9939	0.157	-0.157	0.341609	0.209788	0.171896	0.1262	0.0192232	28.0754	0.268653	0.158437	3.30422	1	0.239907
2022	DBD	Chăm sóc sức khỏe	0.0257	0.1334	0.1334	-0.688048	0.688048	0.141	0.1952	2.39849	0.053111	0.209788	0.10581	0.0817914	0.268653	28.0754	0.087	-0.087	0.34399	-0.00236152	0.228873	0.141	0.0275302	28.2706	0.285159	0.188283	3.07749	1	-0.00236306
2023	DBD	Chăm sóc sức khỏe	0.0167	0.2063	0.1334	-0.738351	0.738351	0.1385	0.193	2.46708	0.070524	-0.00236152	0.155082	0.10581	0.285159	28.2706	0.231	-0.231	0.255818	0.0511406	0.188481	0.1385	0.0425429	28.3186	0.279584	0.179649	3.01607	1	0.0623532
2024	DBD	Chăm sóc sức khỏe	0.0083	0.2336	0.1334	-0.724314	0.724314	0.1294	0.1779	2.6463	0.0425357	0.0511406	0.133103	0.155082	0.279584	28.3186	0.149	-0.149	0.278197	0.0381007	0.169716	0.1294	0.0340741	28.4482	0.266347	0.149081	3.20823	1	0.0458773
2020	DBT	Chăm sóc sức khỏe	0.2362	0.4748	0	-0.151959	0.151959	0.014	0.0604	0.928046	0.0194776	0.0702084	-0.130696	-0.130696	0.724573	27.523	0.079	0.079	0.182896	0.0702084	0.111958	0.014	-0.130696	27.523	0.724573	0.0890547	1.11651	1	0.0637528
2021	DBT	Chăm sóc sức khỏe	0.3081	0.1982	0	-0.252361	0.252361	0.0162	0.0713	0.95581	-0.0345292	0.0702084	-0.0418692	-0.130696	0.724573	27.523	0.36	0.360	0.0844692	-0.249955	0.0607162	0.0162	-0.0116599	27.3915	0.746431	0.0692501	1.07894	1	-0.268243
2022	DBT	Chăm sóc sức khỏe	0.2487	0.2834	0	-0.44621	0.44621	0.0467	0.1859	0.942728	-0.00354073	-0.249955	-0.0423434	-0.0418692	0.746431	27.3915	0.14	-0.140	0.0852434	0.181158	0.0820736	0.0467	-0.00989076	27.4575	0.733213	0.0768285	1.10213	1	0.232938
2023	DBT	Chăm sóc sức khỏe	0.3033	0.361	0	-0.632412	0.632412	0.0191	0.0708	0.943065	0.0453856	0.181158	0.000430156	-0.0423434	0.733213	27.4575	0.284	0.284	0.10027	0.0677964	0.0788037	0.0191	0.000111089	27.4751	0.710282	0.0774324	1.15521	1	0.075532
2024	DBT	Chăm sóc sức khỏe	0.2936	0.608	0	-0.485843	0.485843	0.0158	0.0548	0.96623	0.00794104	0.0677964	-0.0313183	0.000430156	0.710282	27.4751	0.316	0.316	0.0929183	0.0663798	0.152703	0.0158	-0.00789829	27.6248	0.714183	0.131475	1.09857	0	0.0699778
2020	DC4	Công nghiệp	0.1255	0.7681	0	-0.272021	0.272021	0.0493	0.0896	1.85887	0.00381053	0.0927069	0.0643618	0.0643618	0.406282	27.1567	0.181	0.181	-0.0252618	0.0927069	0.0556366	0.0493	0.0643618	27.1567	0.406282	0.058933	2.08875	0	0.150915
2021	DC4	Công nghiệp	0.1762	0.8065	0	0.217583	0.217583	0.0523	0.0866	0.752508	0.00434091	0.0927069	-0.242087	0.0643618	0.406282	27.1567	0.174	0.174	0.279387	0.238077	0.0496803	0.0523	-0.0587803	27.6125	0.386813	0.0314943	2.40636	0	0.317903
2022	DC4	Công nghiệp	0.1258	0.7167	0	0.386029	0.386029	-0.0017	-0.0031	1.00746	0.000728104	0.238077	-0.195041	-0.242087	0.386813	27.6125	0.123	0.123	0.387241	-0.356886	0.0261449	-0.0017	-0.0596842	27.7945	0.494768	0.0217953	1.49396	0	-0.570397
2023	DC4	Công nghiệp	0.1258	0.6398	0	0.25357	0.25357	0.0752	0.166	1.00244	0.00960022	-0.356886	-0.115009	-0.195041	0.494768	27.7945	0.176	0.176	0.106409	0.266726	0.0265512	0.0752	-0.031361	28.1485	0.581595	0.0186348	1.35871	0	1.19034
2024	DC4	Công nghiệp	0.1225	0.543	0.2839	-0.445987	0.445987	0.0589	0.16	0.986587	0.0025286	0.266726	-0.0419191	-0.115009	0.581595	28.1485	0.055	0.055	0.0510191	0.307801	0.0146487	0.0589	-0.0123158	28.5148	0.666825	0.0101563	1.66286	0	0.89356
2020	DCL	Chăm sóc sức khỏe	0.0002	0.7461	0	-0.198231	0.198231	0.0378	0.0764	1.67284	0.0594326	-0.0471646	0.054521	0.054521	0.46068	28.219	0.276	0.276	0.00297897	-0.0471646	0.172779	0.0378	0.054521	28.219	0.46068	0.16434	4.19761	0	-0.107402
2021	DCL	Chăm sóc sức khỏe	0.0002	0.7207	0	-0.120578	0.120578	0.048	0.0918	1.22906	0.0847651	-0.0471646	0.0211392	0.054521	0.46068	28.219	0.073	0.073	0.000760803	0.0179893	0.270199	0.048	0.00541709	28.2082	0.426359	0.273139	1.93193	0	0.0482508
2022	DCL	Chăm sóc sức khỏe	0	0.7207	0	0.0538044	0.0538044	0.0575	0.0953	1.19591	0.130699	0.0179893	-0.252703	0.0211392	0.426359	28.2082	0.186	0.186	0.270103	0.175208	0.260648	0.0575	-0.0628339	28.3755	0.338982	0.220499	2.56692	0	0.443485
2023	DCL	Chăm sóc sức khỏe	0	0.7461	0	-0.10275	0.10275	0.0282	0.044	1.2257	0.105686	0.175208	0.0107016	-0.252703	0.338982	28.3755	0.103	0.103	0.00689836	0.0609221	0.209424	0.0282	0.00289866	28.4541	0.362978	0.193595	2.27015	0	0.12628
2024	DCL	Chăm sóc sức khỏe	0	0.5805	0	-0.141049	0.141049	0.0228	0.0363	1.1859	0.0474679	0.0609221	0.0306539	0.0107016	0.362978	28.4541	0.091	0.091	0.258346	0.0715056	0.201291	0.0228	0.00796446	28.5165	0.379908	0.18911	2.18633	0	0.142359
2020	DCM	Nguyên vật liệu	0.0002	0.9251	0.7556	-0.350084	0.350084	0.07	0.1068	2.04148	0.0268232	0.0509514	0.175042	0.175042	0.27428	29.7964	0.032	-0.032	-0.0861419	0.0509514	0.388832	0.07	0.175042	29.7964	0.27428	0.453735	1.94044	1	0.0735923
2021	DCM	Nguyên vật liệu	0.0001	0.7556	0.7556	-0.483132	0.483132	0.1843	0.2652	1.5582	0.0180038	0.0509514	0.294675	0.175042	0.27428	29.7964	0.141	-0.141	-0.158175	0.264811	0.390666	0.1843	0.0679941	30.0355	0.324601	0.307585	2.2834	1	0.305304
2022	DCM	Nguyên vật liệu	0.0001	0.7556	0.7556	-1.0648	1.0648	0.342	0.4788	1.40609	0.0129867	0.264811	0.517661	0.294675	0.324601	30.0355	0.234	0.234	-0.411061	0.546848	0.199316	0.342	0.144814	30.2819	0.25139	0.155776	4.04399	1	0.613466
2023	DCM	Nguyên vật liệu	0.0001	0.7556	0.7556	-0.301794	0.301794	0.0754	0.1081	1.61771	0.0384042	0.546848	0.163265	0.517661	0.25139	30.2819	0.109	-0.109	-0.0457648	-0.236749	0.112952	0.0754	0.045821	30.3548	0.346147	0.105012	2.98953	1	-0.210618
2024	DCM	Nguyên vật liệu	0.0002	0.7556	0.7556	-0.137571	0.137571	0.0917	0.141	1.55118	0.0204958	-0.236749	0.00508922	0.163265	0.346147	30.3548	0.388	-0.388	0.106411	0.0580814	0.12772	0.0917	0.00131865	30.3865	0.352961	0.123734	2.76044	1	0.0704061
2020	DGC	Nguyên vật liệu	0.2094	0.3957	0.0885	-0.565047	0.565047	0.1711	0.2506	3.57877	0.0510204	0.242672	0.227238	0.227238	0.307807	29.4019	0.035	0.035	-0.0551383	0.242672	0.429802	0.1711	0.227238	29.4019	0.307807	0.345373	1.89841	0	0.225093
2021	DGC	Nguyên vật liệu	0.2162	0.4024	0.0885	-0.87932	0.87932	0.3318	0.4782	1.39933	0.0430026	0.242672	0.445796	0.227238	0.307807	29.4019	0.165	0.165	-0.316696	0.563959	0.335911	0.3318	0.123588	29.7735	0.256842	0.231664	2.74065	1	0.531375
2022	DGC	Nguyên vật liệu	0.2171	0.3099	0	-1.51782	1.51782	0.5076	0.6734	2.7841	0.0179518	0.563959	0.696771	0.445796	0.256842	29.7735	0.19	0.190	-0.636971	0.574354	0.209055	0.5076	0.206187	30.2267	0.191831	0.132877	4.27206	1	0.512411
2023	DGC	Nguyên vật liệu	0.2171	0.3601	0	-0.414535	0.414535	0.2142	0.2799	3.04014	0.0756341	0.574354	0.207672	0.696771	0.191831	30.2267	0.136	0.136	-0.0118723	-0.350319	0.183275	0.2142	0.0634849	30.3783	0.228402	0.157484	3.56913	1	-0.325122
2024	DGC	Nguyên vật liệu	0.2166	0.3099	0	-0.392362	0.392362	0.1905	0.2322	2.93291	0.0232244	-0.350319	0.19996	0.207672	0.228402	30.3783	0.063	0.063	0.0943403	0.00749687	0.159963	0.1905	0.0537735	30.3924	0.134012	0.157731	6.18531	1	0.0119978
2020	DGW	Tiêu dùng không thiết yếu	0.1337	0.5131	0	-0.824524	0.824524	0.0976	0.2571	2.19033	0.0264651	1.68294	0.343604	0.343604	0.622456	28.7523	0.055	-0.055	-0.334204	1.68294	0.0367022	0.0976	0.343604	28.7523	0.622456	0.0287644	1.50193	1	0.476854
2021	DGW	Tiêu dùng không thiết yếu	0	0.3891	0	0.241517	0.241517	0.1361	0.4457	1.26362	0.00717058	1.68294	0.0486414	0.343604	0.622456	28.7523	0.055	0.055	-0.0462414	2.73309	0.030789	0.1361	0.0136348	29.5097	0.727833	0.0144364	1.31603	1	0.669067
2022	DGW	Tiêu dùng không thiết yếu	0	0.38	0	0.144911	0.144911	0.106	0.3277	2.0313	0.0481641	2.73309	-0.169641	0.0486414	0.727833	29.5097	0.009	-0.009	0.142741	0.168885	0.0146121	0.106	-0.0577451	29.4803	0.618706	0.0150476	1.48943	1	0.0528285
2023	DGW	Tiêu dùng không thiết yếu	0	0.38	0	-0.206558	0.206558	0.0513	0.1421	1.56701	0.0221041	0.168885	0.0776075	-0.169641	0.618706	29.4803	0.105	-0.105	-0.0673075	-0.505184	0.0206138	0.0513	0.019117	29.6404	0.64783	0.0175639	1.41247	1	-0.145753
2024	DGW	Tiêu dùng không thiết yếu	0	0.3676	0	-0.162206	0.162206	0.0556	0.1574	1.68224	0.0123708	-0.505184	-0.014419	0.0776075	0.64783	29.6404	0.062	-0.062	-0.047181	0.437236	0.0230602	0.0556	-0.00389272	29.771	0.645619	0.0202377	1.41695	1	0.173315
2020	DHA	Nguyên vật liệu	0.0292	0.3904	0	-0.479822	0.479822	0.2179	0.2409	1.70751	-0.00279981	0.119463	0.247756	0.247756	0.0983204	26.8875	0.072	0.072	-0.256856	0.119463	0.153162	0.2179	0.247756	26.8875	0.0983204	0.137427	7.64657	0	0.153719
2021	DHA	Nguyên vật liệu	0.0263	0.2552	0	-0.427362	0.427362	0.1793	0.2012	1.16534	-0.0543184	0.119463	0.290911	0.247756	0.0983204	26.8875	0.06	-0.060	-0.263211	-0.0947896	0.123183	0.1793	0.0766659	26.9984	0.117914	0.110247	6.89686	0	-0.117824
2022	DHA	Nguyên vật liệu	0.0652	0.2552	0	-0.147063	0.147063	0.1023	0.1149	1.64745	0.0040451	-0.0947896	-0.000187481	0.290911	0.117914	26.9984	0.138	-0.138	-0.0225125	0.0948705	0.100073	0.1023	-4.94676e-05	26.9206	0.0998071	0.108179	8.56943	0	0.149359
2023	DHA	Nguyên vật liệu	0.0652	0.349	0	-0.52021	0.52021	0.1813	0.2041	1.53288	0.000757928	0.0948705	0.343957	-0.000187481	0.0998071	26.9206	0.136	-0.136	-0.330257	-0.025278	0.0923158	0.1813	0.0826419	26.8741	0.124341	0.0967076	6.93145	0	-0.0320301
2024	DHA	Nguyên vật liệu	0.0844	0.4017	0.2373	0.0748614	0.0748614	0.1101	0.1234	1.44261	-0.00790408	-0.025278	-0.216872	0.343957	0.124341	26.8741	0.073	-0.073	0.241172	-0.168845	0.0936882	0.1101	-0.0529582	26.8769	0.0919125	0.0934193	10.0841	0	-0.210989
2020	DHC	Nguyên vật liệu	0.2479	0.4133	0	-0.46965	0.46965	0.1782	0.3119	2.34793	0.0271966	0.689774	0.224586	0.224586	0.389342	28.4571	0.039	0.039	-0.118886	0.689774	0.537321	0.1782	0.224586	28.4571	0.389342	0.497086	1.48399	1	1.01944
2021	DHC	Nguyên vật liệu	0.281	0.4869	0	-0.380486	0.380486	0.2055	0.3113	1.4184	0.0682217	0.689774	0.138916	0.224586	0.389342	28.4571	0.135	0.135	-0.0245157	0.558921	0.460325	0.2055	0.0360798	28.507	0.29325	0.437908	1.6622	1	0.442157
2022	DHC	Nguyên vật liệu	0.2206	0.4552	0	-0.148548	0.148548	0.1436	0.2205	1.35887	0.0319563	0.558921	0.126507	0.138916	0.29325	28.507	0.012	-0.012	-0.0290069	-0.0956178	0.473995	0.1436	0.032416	28.6897	0.392414	0.394864	1.47	1	-0.0551358
2023	DHC	Nguyên vật liệu	0.2969	0.4741	0	-0.217924	0.217924	0.1067	0.172	1.33392	0.0304393	-0.0956178	0.0836914	0.126507	0.392414	28.6897	0.039	-0.039	0.00260865	-0.234457	0.361386	0.1067	0.0228284	28.7009	0.36472	0.357342	1.68032	1	-0.171757
2024	DHC	Nguyên vật liệu	0.1725	0.3186	0	-0.307616	0.307616	0.0786	0.1256	1.31791	0.0531233	-0.234457	0.225088	0.0836914	0.36472	28.7009	0.051	0.051	-0.164188	0.11581	0.341114	0.0786	0.0565886	28.808	0.382653	0.306467	1.76868	1	0.103593
2020	DHG	Chăm sóc sức khỏe	0.0001	0.9432	0.4331	-0.761507	0.761507	0.1722	0.2133	3.28449	0.0180711	-0.0340344	0.199231	0.199231	0.197743	29.1234	0.115	0.115	-0.151731	-0.0340344	0.204807	0.1722	0.199231	29.1234	0.197743	0.190961	4.26342	1	-0.0362185
2021	DHG	Chăm sóc sức khỏe	0.0001	0.9432	0.4331	-0.634537	0.634537	0.1715	0.2114	2.66172	0.00446226	-0.0340344	0.10173	0.199231	0.197743	29.1234	0.141	-0.141	-0.05073	0.0556607	0.172666	0.1715	0.0263223	29.1609	0.178558	0.166303	4.91912	1	0.0659149
2022	DHG	Chăm sóc sức khỏe	0.0004	0.9432	0.4331	-0.81755	0.81755	0.202	0.2446	2.83606	0.0492568	0.0556607	0.195182	0.10173	0.178558	29.1609	0.022	-0.022	-0.178182	0.145711	0.170516	0.202	0.0497114	29.2735	0.169624	0.152353	5.1985	1	0.168078
2023	DHG	Chăm sóc sức khỏe	0.0004	0.9432	0.4331	-0.607316	0.607316	0.1863	0.2298	2.49528	0.0937831	0.145711	0.0464711	0.195182	0.169624	29.2735	0.048	0.048	-0.0239711	0.0656669	0.157918	0.1863	0.0122713	29.441	0.205801	0.133566	3.90349	1	0.0725787
2024	DHG	Chăm sóc sức khỏe	0.4331	0.9432	0.4331	-0.753618	0.753618	0.1291	0.1741	2.59244	0.024099	0.0656669	0.215627	0.0464711	0.205801	29.441	0.074	-0.074	-0.191627	-0.0213613	0.195708	0.1291	0.0584105	29.416	0.312873	0.200674	2.57165	1	-0.0260253
2020	DHM	Nguyên vật liệu	0.2601	0.2432	0	0.090164	0.090164	-0.146	-0.2498	1.12715	0.045548	-0.35875	0.0286949	0.0286949	0.464167	26.9743	0.087	-0.087	0.0252051	-0.35875	0.156117	-0.146	0.0286949	26.9743	0.464167	0.171395	1.00332	0	-0.183592
2021	DHM	Nguyên vật liệu	0.0897	0.054	0	-0.0395195	0.0395195	0.1284	0.2174	0.892835	-0.0123011	-0.35875	0.0352279	0.0286949	0.464167	26.9743	0.164	-0.164	0.0120721	0.941066	0.348325	0.1284	0.00839615	27.0082	0.356148	0.336701	1.46867	0	0.537316
2022	DHM	Nguyên vật liệu	0.0488	0.1249	0	0.262331	0.262331	0.0023	0.0036	0.817939	0.0461091	0.941066	-0.0411205	0.0352279	0.356148	27.0082	0.104	-0.104	0.0638205	0.0738399	0.153947	0.0023	-0.0104546	27.0211	0.362092	0.151971	1.6129	0	0.0283712
2023	DHM	Nguyên vật liệu	0.0488	0.3291	0	0.612165	0.612165	0.0081	0.0171	0.898084	0.00967456	0.0738399	-0.2983	-0.0411205	0.362092	27.0211	0.079	-0.079	0.305	2.3856	0.147581	0.0081	-0.0750567	27.561	0.621959	0.0860165	1.25292	0	0.902909
2024	DHM	Nguyên vật liệu	0.1828	0.3297	0	0.15968	0.15968	0.0029	0.0078	0.936342	0.0198652	2.3856	-0.0318801	-0.2983	0.621959	27.561	0.143	-0.143	0.0545801	0.744401	0.0829048	0.0029	-0.0100705	27.6108	0.637499	0.0788758	1.22652	0	0.25403
2020	DIG	Bất động sản	0.1803	0.5689	0	-0.00244174	0.00244174	0.071	0.1639	2.84909	0.0168256	0.0453116	-0.0615204	-0.0615204	0.594955	30.1013	0.005	0.005	0.25832	0.0453116	0.0932443	0.071	-0.0615204	30.1013	0.594955	0.0646317	1.21924	1	0.175555
2021	DIG	Bất động sản	0.2412	0.5074	0	0.0397478	0.0397478	0.0688	0.1617	0.997142	0.000779604	0.0453116	-0.166282	-0.0615204	0.594955	30.1013	0.015	-0.015	0.393082	0.00689275	0.0613026	0.0688	-0.0491046	30.4552	0.544635	0.0430331	2.4012	0	0.0327741
2022	DIG	Bất động sản	0.1967	0.2774	0	0.215698	0.215698	0.0091	0.0192	1.57556	0.00250463	0.00689275	-0.130941	-0.166282	0.544635	30.4552	0.051	-0.051	0.369741	-0.0398886	0.042587	0.0091	-0.0384672	30.3221	0.471464	0.0486486	2.75665	0	-0.261612
2023	DIG	Bất động sản	0.2098	0.2348	0	-0.167923	0.167923	0.0075	0.0156	1.26118	0.0010294	-0.0398886	0.193875	-0.130941	0.471464	30.3221	0.042	-0.042	-0.111375	-0.0590557	0.0516148	0.0075	0.0452485	30.454	0.530916	0.0452354	1.79024	0	-0.459191
2024	DIG	Bất động sản	0.1655	0	0	0.102027	0.102027	0.0065	0.0144	1.18797	-0.00155828	-0.0590557	-0.0314938	0.193875	0.530916	30.454	0.077	0.077	0.134594	0.0163572	0.0500449	0.0065	-0.00839205	30.5509	0.566257	0.0454243	2.00779	0	0.268343
2020	DLG	Công nghệ thông tin	0.2529	0.2479	0	-0.108865	0.108865	-0.1076	-0.3424	0.951108	0.0239955	-0.0973672	0.0365654	0.0365654	0.695458	29.7389	0.023	0.023	-0.0296654	-0.0973672	0.374075	-0.1076	0.0365654	29.7389	0.695458	0.391525	0.86081	0	-0.291923
2021	DLG	Công nghệ thông tin	0.2579	0.2479	0	-0.061601	0.061601	0.0022	0.0076	0.76305	-0.0172717	-0.0973672	0.0306147	0.0365654	0.695458	29.7389	0.087	-0.087	-0.00631471	-0.0595402	0.346858	0.0022	0.00747923	29.5869	0.672034	0.403777	0.853572	0	-0.240871
2022	DLG	Công nghệ thông tin	0.2534	0.2479	0	-0.252027	0.252027	-0.1923	-0.7699	0.936784	0.00334982	-0.0595402	0.0262727	0.0306147	0.672034	29.5869	0.056	-0.056	0.00952729	-0.027802	0.369069	-0.1923	0.00607013	29.3559	0.802379	0.464989	0.63553	0	-0.127276
2023	DLG	Công nghệ thông tin	0.2534	0.2479	0	-0.185984	0.185984	-0.1115	-0.8662	1.00874	-0.00117372	-0.027802	0.0407986	0.0262727	0.802379	29.3559	0.012	-0.012	-0.0281986	-0.0401896	0.430776	-0.1115	0.00902666	29.2508	0.895582	0.478518	0.408608	0	-0.167329
2024	DLG	Công nghệ thông tin	0.2483	0.307	0	-0.165303	0.165303	0.0442	0.325	0.970263	0.00695277	-0.0401896	0.037234	0.0407986	0.895582	29.2508	0.033	0.033	-0.025234	-0.0125916	0.431625	0.0442	0.00881977	29.1008	0.827091	0.501463	0.723021	0	-0.0566786
2020	DMC	Chăm sóc sức khỏe	0	0.864	0.3471	-0.29354	0.29354	0.1198	0.1398	1.35162	0.00834894	-0.0107214	-0.0292354	-0.0292354	0.101511	28.0122	0.472	-0.472	0.0846354	-0.0107214	0.124435	0.1198	-0.0292354	28.0122	0.101511	0.130306	8.4061	1	-0.0111936
2021	DMC	Chăm sóc sức khỏe	0	0.864	0.3471	-0.363613	0.363613	0.1032	0.1188	1.08917	0.00406771	-0.0107214	0.110961	-0.0292354	0.101511	28.0122	0.095	0.095	-0.061961	0.0317224	0.117484	0.1032	0.027101	28.1146	0.157733	0.106048	5.55956	1	0.0319852
2022	DMC	Chăm sóc sức khỏe	0	0.864	0.3471	-0.455796	0.455796	0.1157	0.1416	1.33013	0.00620065	0.0317224	0.168751	0.110961	0.157733	28.1146	0.063	0.063	-0.131051	0.0581631	0.0983216	0.1157	0.0443461	28.2397	0.205915	0.08676	4.22546	1	0.0629553
2023	DMC	Chăm sóc sức khỏe	0	0.864	0.3471	-0.322887	0.322887	0.0994	0.123	1.41721	0.00397244	0.0581631	0.0810198	0.168751	0.205915	28.2397	0.035	-0.035	-0.0417198	0.0687196	0.0813645	0.0994	0.0215202	28.2458	0.17773	0.0808722	5.09172	1	0.0793012
2024	DMC	Chăm sóc sức khỏe	0	0.864	0.3471	-0.171473	0.171473	0.1099	0.1294	1.42574	0.00995189	0.0687196	0.00848327	0.0810198	0.17773	28.2458	0.394	0.394	0.0566167	0.0975548	0.0852571	0.1099	0.00212725	28.2411	0.123897	0.0856532	6.7107	1	0.10494
2020	DPG	Công nghiệp	0.362	0.3465	0	-0.192772	0.192772	0.0394	0.2052	1.34212	0.00899307	0.0285495	0.0242316	0.0242316	0.708256	29.2039	0.106	-0.106	0.0519684	0.0285495	0.440795	0.0394	0.0242316	29.2039	0.708256	0.464919	0.933415	0	0.0735627
2021	DPG	Công nghiệp	0.2869	0.3421	0	-0.312304	0.312304	0.0635	0.2896	1.02029	0.0613752	0.0285495	0.15215	0.0242316	0.708256	29.2039	0.165	-0.165	-0.0822495	0.0886061	0.50361	0.0635	0.0370243	29.4145	0.700567	0.407954	1.08074	0	0.20163
2022	DPG	Công nghiệp	0.2905	0.3362	0	-0.111046	0.111046	0.0634	0.2529	1.04588	0.040631	0.0886061	0.0558811	0.15215	0.700567	29.4145	0.041	0.041	-0.0317811	0.130072	0.406942	0.0634	0.0154363	29.4457	0.640525	0.394462	1.484	0	0.30408
2023	DPG	Công nghiệp	0.2905	0.3959	0	-0.148374	0.148374	0.0317	0.1166	1.12903	0.0217711	0.130072	0.0990234	0.0558811	0.640525	29.4457	0.31	-0.310	-0.0544234	0.021284	0.378489	0.0317	0.0251413	29.5316	0.648721	0.347344	1.30845	0	0.0393623
2024	DPG	Công nghiệp	0.2905	0.2835	0	0.0086484	0.0086484	0.0342	0.0902	1.04447	0.0465786	0.021284	-0.0429367	0.0990234	0.648721	29.5316	0.298	-0.298	0.0805367	0.0190443	0.328803	0.0342	-0.0111948	29.4902	0.592974	0.342678	1.42151	0	0.0369248
2020	DPM	Nguyên vật liệu	0.0008	0.5959	0.5959	-0.238046	0.238046	0.0608	0.086	1.72143	0.00714494	0.00684225	0.0688158	0.0688158	0.270129	30.0558	0.047	0.047	0.105784	0.00684225	0.374369	0.0608	0.0688158	30.0558	0.270129	0.379019	3.11651	1	0.0101877
2021	DPM	Nguyên vật liệu	0.0008	0.5958	0.5958	-0.576514	0.576514	0.2472	0.3352	1.38608	0.0196141	0.00684225	0.222662	0.0688158	0.270129	30.0558	0.111	0.111	-0.146662	0.444633	0.328937	0.2472	0.055322	30.2642	0.230262	0.267063	4.42431	1	0.647313
2022	DPM	Nguyên vật liệu	0.0005	0.5959	0.5959	-0.865159	0.865159	0.352	0.4571	0.949942	0.00538799	0.444633	0.356466	0.222662	0.230262	30.2642	0.295	0.295	-0.213166	0.419677	0.233858	0.352	0.098368	30.5045	0.208	0.183901	4.53308	1	0.456826
2023	DPM	Nguyên vật liệu	0.0004	0.6759	0.5958	-0.231776	0.231776	0.0335	0.0412	1.16918	0.0135519	0.419677	0.0533848	0.356466	0.208	30.5045	0.028	0.028	0.0458152	-0.285782	0.16885	0.0335	0.0149422	30.2195	0.132544	0.224539	6.44335	1	-0.271538
2024	DPM	Nguyên vật liệu	0	0.6558	0.6558	-0.245394	0.245394	0.036	0.0473	1.15206	0.0202675	-0.285782	0.0712158	0.0533848	0.132544	30.2195	0.008	-0.008	0.00488421	-0.00548816	0.203709	0.036	0.0152836	30.4375	0.324574	0.163797	2.54285	1	-0.00538303
2020	DPR	Nguyên vật liệu	0.0002	0.6315	0.6315	-0.100641	0.100641	0.0474	0.0999	1.11081	0.0242793	0.0279668	0.0231428	0.0231428	0.384154	28.9595	0.024	0.024	-0.0126428	0.0279668	0.414057	0.0474	0.0231428	28.9595	0.384154	0.409877	2.20737	0	0.101173
2021	DPR	Nguyên vật liệu	0.0002	0.5581	0.5581	-0.287966	0.287966	0.1104	0.2164	0.905306	0.0146405	0.0279668	0.187295	0.0231428	0.384154	28.9595	0.103	-0.103	-0.219395	0.0209895	0.390579	0.1104	0.0470613	29.0254	0.319886	0.365675	3.47718	0	0.0696582
2022	DPR	Nguyên vật liệu	0.0002	0.5581	0.5581	-0.16537	0.16537	0.0605	0.1102	0.607	0.0196665	0.0209895	0.0701456	0.187295	0.319886	29.0254	0.059	-0.059	-0.0611456	-0.00151502	0.353707	0.0605	0.0181139	29.0577	0.281779	0.342465	6.30181	0	-0.00502062
2023	DPR	Nguyên vật liệu	0.0001	0.5581	0.5581	-0.126162	0.126162	0.0496	0.0897	1.06624	0.0215754	-0.00151502	0.0552617	0.0701456	0.281779	29.0577	0.021	-0.021	-0.0203617	-0.0407239	0.331354	0.0496	0.0140385	29.0799	0.282726	0.324087	8.38587	0	-0.140088
2024	DPR	Nguyên vật liệu	0.0003	0.5524	0.5524	-0.190474	0.190474	0.0599	0.0833	1.03035	0.0226936	-0.0407239	0.0837334	0.0552617	0.282726	29.0799	0.042	-0.042	-0.0248334	0.0430535	0.324217	0.0599	0.0211655	29.1325	0.27922	0.307609	8.60731	0	0.176092
2020	DQC	Công nghiệp	0.2447	0.4006	0	-0.365516	0.365516	0.0109	0.0168	1.24695	0.0791947	0.0767699	0.0325679	0.0325679	0.345094	27.9744	0.03	-0.030	-0.0282679	0.0767699	0.253469	0.0109	0.0325679	27.9744	0.345094	0.270083	2.1509	0	0.139787
2021	DQC	Công nghiệp	0.3428	0.2711	0	-0.174637	0.174637	0.0154	0.0234	0.739607	0.0143666	0.0767699	-0.0255271	0.0325679	0.345094	27.9744	0.038	-0.038	0.0416271	-0.146413	0.254223	0.0154	-0.00617926	27.9747	0.330262	0.254132	2.21048	0	-0.219512
2022	DQC	Công nghiệp	0.2444	0.1934	0	-0.261352	0.261352	0.0095	0.0148	0.723938	0.0186633	-0.146413	-0.0573237	-0.0255271	0.330262	27.9747	0.081	-0.081	0.102424	0.181408	0.239287	0.0095	-0.0143335	28.0265	0.371109	0.227213	1.94988	0	0.3486
2023	DQC	Công nghiệp	0.2437	0.3622	0	-0.38703	0.38703	-0.0235	-0.038	0.678559	-0.00174673	0.181408	-0.0182393	-0.0573237	0.371109	28.0265	0.095	-0.095	0.0390393	-0.0879587	0.223391	-0.0235	-0.00467785	27.9985	0.37638	0.229738	1.87027	0	-0.131993
2024	DQC	Công nghiệp	0.3246	0.5935	0	-0.392676	0.392676	-0.0924	-0.146	0.643442	0.034231	-0.0879587	0.0966191	-0.0182393	0.37638	27.9985	0.097	-0.097	-0.0598191	-0.0314324	0.212519	-0.0924	0.0238164	27.8216	0.356454	0.253646	1.79387	0	-0.0528396
2020	DRC	Tiêu dùng không thiết yếu	0.002	0.5554	0.5051	-0.615562	0.615562	0.0998	0.1544	1.67669	0.00337743	-0.0780814	0.314956	0.314956	0.305844	28.5192	0.055	0.055	-0.353256	-0.0780814	0.392722	0.0998	0.314956	28.5192	0.305844	0.437568	1.76709	0	-0.0548109
2021	DRC	Tiêu dùng không thiết yếu	0.5077	0.5051	0.5051	-0.0220577	0.0220577	0.1045	0.168	1.24687	0.00430665	-0.0780814	-0.0278986	0.314956	0.305844	28.5192	0.14	-0.140	0.0328986	0.301507	0.401309	0.1045	-0.00659792	28.774	0.434323	0.31106	1.55456	0	0.200973
2022	DRC	Tiêu dùng không thiết yếu	0.0058	0.5051	0.5051	-0.169794	0.169794	0.0937	0.1668	1.41269	0.00379892	0.301507	0.00904946	-0.0278986	0.434323	28.774	0.185	-0.185	-0.00764946	0.165523	0.287167	0.0937	0.00254898	28.86	0.44123	0.263486	1.63075	0	0.118522
2023	DRC	Tiêu dùng không thiết yếu	0.0106	0.5051	0.5051	-0.473881	0.473881	0.0724	0.131	1.47439	0.0654278	0.165523	0.171211	0.00904946	0.44123	28.86	0.051	-0.051	-0.157211	-0.118033	0.274691	0.0724	0.0446435	28.8502	0.452957	0.277407	1.51968	0	-0.082353
2024	DRC	Tiêu dùng không thiết yếu	0.1126	0.5051	0.5051	-0.0948672	0.0948672	0.0611	0.123	1.35003	0.0199447	-0.118033	-0.0319828	0.171211	0.452957	28.8502	0.048	-0.048	0.0436828	0.0525522	0.35837	0.0611	-0.00795637	29.0661	0.543948	0.288767	1.30623	0	0.0395656
2020	DSN	Tiêu dùng không thiết yếu	0.0053	0.3354	0	-0.0956258	0.0956258	0.1644	0.1841	2.62432	0.0113424	-0.489784	-0.0413657	-0.0413657	0.0807719	26.1359	0.006	-0.006	0.0728657	-0.489784	0.0256971	0.1644	-0.0413657	26.1359	0.0807719	0.0316349	15.7848	0	-0.616038
2021	DSN	Tiêu dùng không thiết yếu	0.0053	0.3354	0	-0.0264753	0.0264753	0.116	0.1281	3.33331	0.0180546	-0.489784	0.0646287	-0.0413657	0.0807719	26.1359	0.055	-0.055	-0.0460287	-0.263235	0.0136746	0.116	0.0144838	26.0251	0.0884399	0.0152766	10.7228	0	-0.700446
2022	DSN	Tiêu dùng không thiết yếu	0.0053	0.3354	0	-1.35725	1.35725	0.4456	0.4991	2.44755	0.00495864	-0.263235	0.510987	0.0646287	0.0884399	26.0251	0.17	-0.170	-0.385787	1.03102	0.0443249	0.4456	0.120678	26.3699	0.114837	0.0313988	8.2645	0	8.19814
2023	DSN	Tiêu dùng không thiết yếu	0.0019	0.3354	0	-0.688502	0.688502	0.3576	0.3976	2.00338	0.0263929	1.03102	0.124388	0.510987	0.114837	26.3699	0.046	-0.046	-0.0166878	0.0590678	0.0543572	0.3576	0.0364052	26.5712	0.0854809	0.0444474	11.3981	0	0.0720828
2024	DSN	Tiêu dùng không thiết yếu	0.0019	0.4417	0	-0.561679	0.561679	0.2572	0.2928	1.93093	0.00599799	0.0590678	0.180699	0.124388	0.0854809	26.5712	0.064	-0.064	-0.0294991	-0.090264	0.0621657	0.2572	0.0497057	26.6479	0.15477	0.0575716	6.13802	0	-0.125655
2020	DTA	Bất động sản	0.2409	0.3744	0	-0.0760098	0.0760098	-0.0076	-0.0205	1.37344	0.0194645	-0.0213757	0.0720656	0.0720656	0.656142	27.0056	0.047	-0.047	0.00673441	-0.0213757	0.0335319	-0.0076	0.0720656	27.0056	0.656142	0.029074	0.858144	0	-0.186872
2021	DTA	Bất động sản	0.2409	0.3744	0	0.0821004	0.0821004	0.0166	0.0528	0.846665	0.00512854	-0.0213757	0.0190386	0.0720656	0.656142	27.0056	0.024	-0.024	0.0812614	0.122783	0.0414624	0.0166	0.00509858	27.2288	0.710037	0.0331666	0.903661	0	1.5225
2022	DTA	Bất động sản	0.2409	0.388	0	0.156382	0.156382	0.0114	0.0408	0.859635	0	0.122783	-0.063964	0.0190386	0.710037	27.2288	0.221	0.221	0.155264	0.0307599	0.0315018	0.0114	-0.0177686	27.342	0.730638	0.0281301	0.635276	0	0.189028
2023	DTA	Bất động sản	0.1642	0.3437	0	-0.0802343	0.0802343	0.0018	0.0066	0.818251	0	0.0307599	0.0293114	-0.063964	0.730638	27.342	0.194	0.194	0.0197886	-0.0393529	0.0266435	0.0018	0.00774217	27.287	0.713799	0.0281513	0.455741	0	-0.227767
2024	DTA	Bất động sản	0.131	0.3767	0	0.0431454	0.0431454	0.0022	0.0074	0.791174	0.00276801	-0.0393529	-0.0182543	0.0293114	0.713799	27.287	0.387	0.387	0.0868543	0.0591422	0.0265806	0.0022	-0.004438	27.1759	0.677867	0.0297034	0.645711	0	0.419523
2020	DTL	Nguyên vật liệu	0.6547	0.9013	0	-0.221084	0.221084	0.0081	0.0213	1.79794	0.0156436	-0.190123	0.149636	0.149636	0.583924	28.5185	0.046	-0.046	-0.273436	-0.190123	0.166008	0.0081	0.149636	28.5185	0.583924	0.190908	1.21864	0	-0.211319
2021	DTL	Nguyên vật liệu	0.6548	0.9022	0	-0.397213	0.397213	0.026	0.0541	1.29703	0.0196871	-0.190123	0.203233	0.149636	0.583924	28.5185	0.142	-0.142	-0.199333	-0.247571	0.187875	0.026	0.0472636	28.2662	0.436058	0.241794	1.44574	0	-0.303394
2022	DTL	Nguyên vật liệu	0.6547	0.8989	0	0.569037	0.569037	-0.0717	-0.1545	0.983427	-0.00822148	-0.247571	-0.406219	0.203233	0.436058	28.2662	0.006	0.006	0.351619	0.122794	0.183513	-0.0717	-0.0888107	28.4933	0.615115	0.146228	1.26023	0	0.167849
2023	DTL	Nguyên vật liệu	0.6547	0.8989	0	-0.0781263	0.0781263	-0.0703	-0.1873	0.93052	-8.93944e-05	0.122794	0.100892	-0.406219	0.615115	28.4933	0.153	-0.153	-0.0919924	0.151602	0.128418	-0.0703	0.0280751	28.3599	0.635613	0.146745	1.23967	0	0.222687
2024	DTL	Nguyên vật liệu	0.6547	0.8955	0	0.0690036	0.0690036	0.002	0.0056	0.932037	0.0189162	0.151602	0.0157395	0.100892	0.635613	28.3599	0.03	0.030	-0.0148395	-0.00231706	0.14749	0.002	0.00367281	28.3824	0.641729	0.144218	1.16732	0	-0.002436
2020	DTT	Nguyên vật liệu	0.3005	0.6977	0	-0.29347	0.29347	0.0517	0.0707	1.13276	0.0222423	-0.0565267	0.202915	0.202915	0.261496	25.8497	0.054	-0.054	-0.172115	-0.0565267	0.445149	0.0517	0.202915	25.8497	0.261496	0.44597	2.0949	0	-0.0571316
2021	DTT	Nguyên vật liệu	0.2986	0.7018	0	-0.0209312	0.0209312	0.0216	0.0282	0.850805	0.0612361	-0.0565267	0.0247104	0.202915	0.261496	25.8497	0.103	-0.103	0.0358896	-0.00389548	0.439442	0.0216	0.00617191	25.7479	0.202381	0.486519	2.52234	0	-0.00416805
2022	DTT	Nguyên vật liệu	0.3244	0.7211	0	-0.235533	0.235533	0.0578	0.0736	1.2514	0.0593968	-0.00389548	0.120553	0.0247104	0.202381	25.7479	0.004	-0.004	-0.0645527	0.198628	0.490338	0.0578	0.0286059	25.8397	0.224732	0.447336	2.40368	0	0.192765
2023	DTT	Nguyên vật liệu	0.4005	0.7432	0	-0.127387	0.127387	0.0503	0.0655	1.0482	0.0711629	0.198628	0.0559009	0.120553	0.224732	25.8397	0.091	-0.091	0.00819908	-0.0948393	0.464607	0.0503	0.0146161	25.8677	0.240047	0.451769	2.20055	0	-0.0845829
2024	DTT	Nguyên vật liệu	0.4005	0.7882	0	-0.267356	0.267356	0.0647	0.0863	1.19257	0.0428606	-0.0948393	0.132184	0.0559009	0.240047	25.8677	0.006	0.006	-0.0708839	0.153023	0.467798	0.0647	0.0335089	25.9242	0.260298	0.442122	2.09953	0	0.153321
2020	DXG	Bất động sản	0.1594	0.1215	0	0.0935646	0.0935646	-0.023	-0.0754	1.27845	0.0346314	-0.147025	-0.039246	-0.039246	0.610318	30.78	0.035	0.035	0.045746	-0.147025	0.0178614	-0.023	-0.039246	30.78	0.610318	0.0152326	1.91142	1	-0.502775
2021	DXG	Bất động sản	0.1607	0.1408	0	-0.363455	0.363455	0.0449	0.1551	0.799314	-0.00373268	-0.147025	0.0525477	-0.039246	0.610318	30.78	0.093	0.093	-0.0502477	0.308807	0.0182997	0.0449	0.0141805	30.9723	0.526388	0.0150985	1.90507	1	2.49035
2022	DXG	Bất động sản	0.2206	0.3858	0	0.0912582	0.0912582	0.0073	0.0239	0.913786	-0.0120016	0.308807	-0.138175	0.0525477	0.526388	30.9723	0.102	-0.102	0.138975	-0.162018	0.0139403	0.0073	-0.0378549	31.0429	0.535468	0.0129902	2.23345	1	-0.453711
2023	DXG	Bất động sản	0.2085	0.2827	0	-0.0391289	0.0391289	0.0058	0.0184	0.888665	-0.0215494	-0.162018	-0.0280331	-0.138175	0.535468	31.0429	0.265	0.265	0.0370331	-0.058933	0.0122757	0.0058	-0.00725554	30.9909	0.507186	0.01293	2.25777	1	-0.324198
2024	DXG	Bất động sản	0.1748	0.1695	0	-0.0853456	0.0853456	0.0088	0.0174	0.86433	0.00209075	-0.058933	-0.04824	-0.0280331	0.507186	30.9909	0.09	0.090	0.14374	0.0371927	0.0128444	0.0088	-0.011747	31.0046	0.479077	0.0126697	2.4969	1	0.287435
2020	DXV	Nguyên vật liệu	0	0.6581	0.6581	0.115134	0.115134	0.0008	0.001	0.694047	0.000857278	-0.455731	-0.0700177	-0.0700177	0.165144	25.6058	0.001	-0.001	0.150818	-0.455731	0.086269	0.0008	-0.0700177	25.6058	0.165144	0.0906775	5.46817	0	-0.2539
2021	DXV	Nguyên vật liệu	0	0.6581	0.6581	-0.0248839	0.0248839	0.003	0.0036	0.462909	-0.0680396	-0.455731	-0.0546097	-0.0700177	0.165144	25.6058	0.131	-0.131	0.12851	0.0610182	0.0771019	0.003	-0.0133123	25.5873	0.146518	0.078542	6.25141	0	0.0433483
2022	DXV	Nguyên vật liệu	0	0.6581	0.6581	-0.0141114	0.0141114	0.0015	0.0018	0.462561	0.000416824	0.0610182	-0.0202513	-0.0546097	0.146518	25.5873	0.408	-0.408	0.101351	0.226426	0.0693076	0.0015	-0.00501597	25.6446	0.192673	0.0654441	4.82346	0	0.151346
2023	DXV	Nguyên vật liệu	0	0.6581	0.6581	0.0704911	0.0704911	-0.0621	-0.0782	0.500045	0.00270996	0.226426	0.0129135	-0.0202513	0.192673	25.6446	0.123	0.123	0.0579865	-0.389992	0.0589199	-0.0621	0.00332093	25.5985	0.218181	0.0616995	4.27473	0	-0.239777
2024	DXV	Nguyên vật liệu	0	0.6581	0.6581	-0.137082	0.137082	-0.0443	-0.0568	0.524243	-0.00795387	-0.389992	0.0717183	0.0129135	0.218181	25.5985	0.117	0.117	0.0101817	0.0609974	0.0642063	-0.0443	0.0175164	25.5461	0.221629	0.0676631	4.17701	0	0.0471088
2020	ELC	Công nghệ thông tin	0.2778	0.4837	0.08	-0.281014	0.281014	0.0218	0.0384	1.14771	0.000195243	-0.0513149	0.18728	0.18728	0.430439	28.0353	0.014	-0.014	-0.01338	-0.0513149	0.0473668	0.0218	0.18728	28.0353	0.430439	0.0446857	1.89685	0	-0.0829099
2021	ELC	Công nghệ thông tin	0.2878	0.4878	0.08	-0.0892144	0.0892144	0.0364	0.0567	0.699802	-0.00078379	-0.0513149	-0.0649982	0.18728	0.430439	28.0353	0.066	0.066	0.192098	-0.0955181	0.00721464	0.0364	-0.0167228	27.7667	0.241801	0.00943719	3.27781	0	-0.178379
2022	ELC	Công nghệ thông tin	0.2901	0.2454	0	-0.0723777	0.0723777	0.0273	0.036	1.24098	0.00494303	-0.0955181	-0.0907965	-0.0649982	0.241801	27.7667	0.061	-0.061	0.251696	0.178247	0.0607778	0.0273	-0.0196694	27.7663	0.203897	0.0608017	3.65876	0	0.309727
2023	ELC	Công nghệ thông tin	0.2076	0.2317	0	-0.307821	0.307821	0.0524	0.084	1.59189	0.0258436	0.178247	0.083707	-0.0907965	0.203897	27.7663	0.028	-0.028	0.036493	0.102025	0.0785768	0.0524	0.0209226	28.2305	0.367334	0.0493987	2.07692	0	0.135305
2024	ELC	Công nghệ thông tin	0.2577	0.1923	0	-0.247016	0.247016	0.0501	0.0795	1.49839	0.012447	0.102025	0.0769115	0.083707	0.367334	28.2305	0.012	-0.012	0.0513885	-0.0988101	0.0549244	0.0501	0.0236118	28.3192	0.372531	0.0502623	1.81981	0	-0.1836
2020	EVE	Tiêu dùng không thiết yếu	0.1982	0.4268	0	-0.394709	0.394709	0.0291	0.0447	0.849683	0.00671262	-0.0967983	0.102303	0.102303	0.302066	27.9334	0.073	0.073	-0.00750279	-0.0967983	0.134084	0.0291	0.102303	27.9334	0.302066	0.152377	7.09873	1	-0.148218
2021	EVE	Tiêu dùng không thiết yếu	0.1982	0.471	0	-0.281127	0.281127	0.0456	0.0626	0.698429	0.0541053	-0.0967983	-0.0388536	0.102303	0.302066	27.9334	0.161	0.161	0.0214536	0.00782619	0.140094	0.0456	-0.0090931	27.869	0.240165	0.149401	3.55104	1	0.0123797
2022	EVE	Tiêu dùng không thiết yếu	0.1969	0.4937	0	-0.490335	0.490335	0.0672	0.0929	0.718034	0.119928	0.00782619	0.0672002	-0.0388536	0.240165	27.869	0.168	-0.168	0.0120998	0.122406	0.130452	0.0672	0.0162599	28.0072	0.294402	0.11362	3.38174	1	0.179343
2023	EVE	Tiêu dùng không thiết yếu	0.1945	0.5248	0	-0.410018	0.410018	0.0127	0.0178	0.584487	0.0906302	0.122406	0.10177	0.0672002	0.294402	28.0072	0.374	-0.374	-0.0176701	-0.160908	0.241756	0.0127	0.0271971	27.9355	0.262488	0.259734	3.29671	1	-0.229518
2024	EVE	Tiêu dùng không thiết yếu	0.1945	0.4243	0	-0.408517	0.408517	-0.0229	-0.031	0.599741	0.0513133	-0.160908	0.0508091	0.10177	0.262488	27.9355	0.048	-0.048	0.00589089	-0.0336405	0.232571	-0.0229	0.0122469	27.8811	0.261402	0.245553	3.18462	1	-0.0579678
2020	EVG	Bất động sản	0.3615	0.3283	0	-0.0352244	0.0352244	0.0205	0.0281	1.01558	0.0455411	0.215814	0.0621479	0.0621479	0.27791	27.6595	0.053	-0.053	-0.104048	0.215814	0.00179245	0.0205	0.0621479	27.6595	0.27791	0.00147901	2.18105	0	0.313068
2021	EVG	Bất động sản	0.3505	0.3283	0	0.373945	0.373945	0.0153	0.0252	0.399364	0.0641934	0.215814	-0.330479	0.0621479	0.27791	27.6595	0.135	-0.135	0.348779	0.19428	0.00057193	0.0153	-0.0905355	28.3393	0.228712	0.00028982	3.95787	0	0.260122
2022	EVG	Bất động sản	0.3534	0.3926	0	0.614011	0.614011	0.0108	0.0149	0.446287	0.211068	0.19428	-0.291407	-0.330479	0.228712	28.3393	0.109	-0.109	0.306307	0.152333	0.000697317	0.0108	-0.0967011	28.6107	0.0244713	0.000531537	29.4669	0	0.319407
2023	EVG	Bất động sản	0.3667	0.3926	0	0.2288	0.2288	0.0098	0.0137	0.651217	0.0412954	0.152333	-0.168566	-0.291407	0.0244713	28.6107	0.039	-0.039	0.177966	-0.0705433	0.000374617	0.0098	-0.0478267	28.9123	0.269868	0.000277101	6.06522	0	-0.14707
2024	EVG	Bất động sản	0.3759	0.3926	0	0.364077	0.364077	0.0074	0.0115	0.697103	0.0283375	-0.0705433	-0.182576	-0.168566	0.269868	28.9123	0.095	-0.095	0.197276	0.0285834	0.000259405	0.0074	-0.0524737	29.2118	0.421102	0.000192264	4.05991	0	0.0944537
2020	FCM	Nguyên vật liệu	0.0013	0.6805	0	-0.162773	0.162773	0.034	0.0566	0.807078	0.000471711	-0.197355	0.0640608	0.0640608	0.30229	27.42	0.291	-0.291	-0.0464608	-0.197355	0.168666	0.034	0.0640608	27.42	0.30229	0.188686	2.5903	1	-0.238207
2021	FCM	Nguyên vật liệu	0.0007	0.6805	0	-0.0724505	0.0724505	0.0162	0.0254	0.505756	0.00618604	-0.197355	0.0663085	0.0640608	0.30229	27.42	0.057	-0.057	-0.0612085	0.0339183	0.153799	0.0162	0.0156484	27.4148	0.299162	0.154611	2.71087	1	0.0480386
2022	FCM	Nguyên vật liệu	0.0007	0.51	0	-0.123983	0.123983	0.0253	0.04	0.555765	0.0219323	0.0339183	0.0715561	0.0663085	0.299162	27.4148	0.143	0.143	-0.0706561	-0.00985404	0.122289	0.0253	0.0178419	27.4494	0.314027	0.118122	2.68774	1	-0.0132467
2023	FCM	Nguyên vật liệu	0.0007	0.51	0	-0.0449472	0.0449472	0.0173	0.0269	0.449762	0.00450171	-0.00985404	0.0015461	0.0715561	0.314027	27.4494	0.047	-0.047	-0.0012461	-0.158662	0.0901552	0.0173	0.000393225	27.4173	0.276077	0.0931009	3.06376	1	-0.223776
2024	FCM	Nguyên vật liệu	0.0007	0.51	0	-0.118431	0.118431	0.0021	0.0028	0.39967	0.017815	-0.158662	0.0936476	0.0015461	0.276077	27.4173	0.184	0.184	-0.0908476	0.0125101	0.0287268	0.0021	0.0230356	27.1717	0.153075	0.0367218	5.78369	1	0.0220115
2020	FCN	Công nghiệp	0.0843	0.3056	0	-0.0213318	0.0213318	0.0191	0.0538	1.1535	0.07026	0.0111559	0.0156986	0.0156986	0.630845	29.545	0.022	-0.022	0.0330014	0.0111559	0.119175	0.0191	0.0156986	29.545	0.630845	0.0992662	1.42641	0	0.0203813
2021	FCN	Công nghiệp	0.0552	0.3567	0	0.0526516	0.0526516	0.0096	0.0281	0.836061	0.17886	0.0111559	-0.0162809	0.0156986	0.630845	29.545	0.126	-0.126	0.0358809	0.0486755	0.278213	0.0096	-0.00444119	29.6454	0.609219	0.251652	1.50428	0	0.104631
2022	FCN	Công nghiệp	0.0405	0.3567	0	-0.00595544	0.00595544	0.0053	0.0149	0.833341	-0.00289216	0.0486755	-0.0270681	-0.0162809	0.609219	29.6454	0.079	0.079	0.159368	-0.0585255	0.239693	0.0053	-0.00710622	29.6567	0.540518	0.236997	1.66092	0	-0.125908
2023	FCN	Công nghiệp	0.0405	0.3567	0	-0.107432	0.107432	-0.004	-0.0125	0.844001	0.00424023	-0.0585255	0.0541353	-0.0270681	0.540518	29.6567	0.225	-0.225	0.157465	-0.021892	0.226393	-0.004	0.0136104	29.7806	0.608249	0.199998	1.4208	0	-0.0544939
2024	FCN	Công nghiệp	0.0375	0.589	0	-0.0260774	0.0260774	0.001	0.0028	0.88982	0.0392749	-0.021892	-0.01993	0.0541353	0.608249	29.7806	0.087	0.087	0.23963	0.0576977	0.184333	0.001	-0.00529092	29.9038	0.652998	0.162975	1.32462	0	0.171946
2020	FIT	Chăm sóc sức khỏe	0.0386	0.5705	0	-0.084239	0.084239	0.0107	0.0187	0.844011	0.0211389	0.00131556	0.0137197	0.0137197	0.234179	29.2957	0.017	-0.017	-0.00831971	0.00131556	0.088923	0.0107	0.0137197	29.2957	0.234179	0.0889353	4.52767	0	0.00588449
2021	FIT	Chăm sóc sức khỏe	0.0004	0.3628	0	-0.0698578	0.0698578	0.028	0.0497	0.38147	0.0316293	0.00131556	-0.00164307	0.0137197	0.234179	29.2957	0.077	-0.077	0.0213431	0.00608139	0.126182	0.028	-0.000410738	29.4201	0.214631	0.111419	3.18807	0	0.027039
2022	FIT	Chăm sóc sức khỏe	0.0001	0.3041	0	0.150906	0.150906	0.0074	0.0135	0.381017	0.0292413	0.00608139	-0.280078	-0.00164307	0.214631	29.4201	0.05	-0.050	0.295978	0.116417	0.107309	0.0074	-0.0743698	29.5766	0.161931	0.091765	4.91894	0	0.570761
2023	FIT	Chăm sóc sức khỏe	0.0001	0.3042	0	-0.0676855	0.0676855	-0.0156	-0.0303	0.437649	0.0178669	0.116417	0.00548463	-0.280078	0.161931	29.5766	0.007	-0.007	0.000815374	-0.0244997	0.0888062	-0.0156	0.00147822	29.675	0.250547	0.0804812	3.37776	0	-0.0894226
2024	FIT	Chăm sóc sức khỏe	0.0001	0.3042	0	-0.0925262	0.0925262	0.0154	0.0203	0.41837	0.0206877	-0.0244997	0.0161347	0.00548463	0.250547	29.675	0.073	-0.073	0.000765312	0.0269234	0.0859482	0.0154	0.00423203	29.6784	0.233219	0.0856569	3.91693	0	0.119083
2020	FMC	Tiêu dùng thiết yếu	0.0331	0.5474	0	-0.188486	0.188486	0.1398	0.2237	1.77401	0.0458272	0.463972	0.0276217	0.0276217	0.368179	28.1682	0.066	-0.066	-0.0096217	0.463972	0.2024	0.1398	0.0276217	28.1682	0.368179	0.179888	1.97048	1	0.190217
2021	FMC	Tiêu dùng thiết yếu	0.0201	0.5012	0	-0.125121	0.125121	0.1211	0.2002	1.14942	0.135018	0.463972	0.10424	0.0276217	0.368179	28.1682	0.069	-0.069	-0.0920402	0.458103	0.153679	0.1211	0.0275946	28.6242	0.26781	0.0974039	3.01519	1	0.177542
2022	FMC	Tiêu dùng thiết yếu	0.0201	0.7502	0	-0.329595	0.329595	0.1086	0.1668	1.23494	0.202814	0.458103	0.161201	0.10424	0.26781	28.6242	0.114	-0.114	-0.148201	0.186111	0.155062	0.1086	0.0493328	28.7259	0.292005	0.140067	2.17609	1	0.0966433
2023	FMC	Tiêu dùng thiết yếu	0.0201	0.7502	0	-0.0921501	0.0921501	0.087	0.1397	1.24418	0.0718865	0.186111	0.0693189	0.161201	0.292005	28.7259	0.03	0.030	-0.0590189	-0.20549	0.283851	0.087	0.0182102	28.8418	0.334321	0.25278	1.91329	1	-0.10772
2024	FMC	Tiêu dùng thiết yếu	0.0177	0.7502	0	-0.374014	0.374014	0.0857	0.1301	1.1609	0.0643383	-0.20549	0.179204	0.0693189	0.334321	28.8418	0.136	-0.136	-0.162004	0.543841	0.22885	0.0857	0.047395	28.9594	0.346761	0.203466	2.03605	1	0.358775
2020	FPT	Công nghệ thông tin	0.1093	0.1299	0.059	-0.680409	0.680409	0.0942	0.2382	2.20916	0.0923663	0.0632877	0.189844	0.189844	0.554188	31.3623	0.148	-0.148	-0.180744	0.0632877	0.24908	0.0942	0.189844	31.3623	0.554188	0.199304	1.12972	1	0.0762508
2021	FPT	Công nghệ thông tin	0.106	0.1288	0.0583	-0.590741	0.590741	0.0909	0.2575	1.95322	0.0804756	0.0632877	0.139925	0.189844	0.554188	31.3623	0.011	-0.011	-0.0719254	0.139618	0.249168	0.0909	0.0388647	31.6144	0.60114	0.193654	1.18001	1	0.195333
2022	FPT	Công nghệ thông tin	0.1081	0.128	0.0579	-0.535899	0.535899	0.1008	0.2724	2.52683	0.069099	0.139618	0.0941159	0.139925	0.60114	31.6144	0.125	-0.125	-0.0457159	0.155542	0.224085	0.1008	0.0264786	31.5755	0.509082	0.232968	1.26167	1	0.234237
2023	FPT	Công nghệ thông tin	0.0947	0.1082	0.0579	-0.734269	0.734269	0.1155	0.281	3.66138	0.10857	0.155542	0.18426	0.0941159	0.509082	31.5755	0.012	-0.012	-0.13116	0.166666	0.264146	0.1155	0.0451696	31.7301	0.503457	0.22632	1.2379	1	0.195602
2024	FPT	Công nghệ thông tin	0.1046	0.1274	0.0575	-0.719386	0.719386	0.1188	0.2393	3.61959	0.060725	0.166666	0.194148	0.18426	0.503457	31.7301	0.165	-0.165	-0.147848	0.169715	0.245777	0.1188	0.0522802	31.9077	0.503784	0.20578	1.30714	1	0.194438
2020	FRT	Tiêu dùng không thiết yếu	0.012	0.541	0	-0.830899	0.830899	0.0041	0.0199	1.91608	0.000520047	-0.299152	0.230268	0.230268	0.772601	29.3151	0.016	-0.016	-0.220968	-0.299152	0.00767813	0.0041	0.230268	29.3151	0.772601	0.00939715	1.19161	1	-0.118585
2021	FRT	Tiêu dùng không thiết yếu	0.0131	0.4653	0	-0.00662557	0.00662557	0.0549	0.3086	1.32291	0.0543769	-0.299152	-0.242058	0.230268	0.772601	29.3151	0.071	0.071	0.259458	1.454	0.0831706	0.0549	-0.0544225	30.0124	0.844804	0.0414116	1.11422	1	0.534297
2022	FRT	Tiêu dùng không thiết yếu	0.0148	0.546	0	-0.339936	0.339936	0.0366	0.2127	2.02671	0.0480937	1.454	-0.139339	-0.242058	0.844804	30.0124	0.094	0.094	0.165339	0.708928	0.0783034	0.0366	-0.046511	29.9847	0.805267	0.0805099	1.10059	1	0.341003
2023	FRT	Tiêu dùng không thiết yếu	0.0097	0.7459	0	-0.3552	0.3552	-0.0293	-0.1916	2.80341	0.0670136	0.708928	-0.176467	-0.139339	0.805267	29.9847	0.082	0.082	0.211567	0.160004	0.124255	-0.0293	-0.0435038	30.2035	0.86875	0.0998315	1.00322	1	0.0558198
2024	FRT	Tiêu dùng không thiết yếu	0.0097	0.5757	0	-0.786217	0.786217	0.0219	0.1654	2.46324	0.0194159	0.160004	0.0478741	-0.176467	0.86875	30.2035	0.033	0.033	-0.0228741	0.630215	0.110393	0.0219	0.013273	30.3931	0.86611	0.0913297	1.0229	1	0.259182
2020	GAS	Dịch vụ tiện ích	0	0.9576	0.9576	-0.227811	0.227811	0.1253	0.1621	3.45684	0.0666931	-0.174824	0.117892	0.117892	0.216881	31.7775	0.104	0.104	-0.0383923	-0.174824	0.318012	0.1253	0.117892	31.7775	0.216881	0.312832	4.04894	1	-0.144928
2021	GAS	Dịch vụ tiện ích	0	0.9576	0.9576	-0.278114	0.278114	0.1222	0.1743	2.87659	0.0722452	-0.174824	0.120155	0.117892	0.216881	31.7775	0.279	-0.279	-0.0823552	0.235051	0.286327	0.1222	0.0302855	31.9975	0.337387	0.229767	3.10331	1	0.231655
2022	GAS	Dịch vụ tiện ích	0	0.9576	0.9576	-0.372582	0.372582	0.1833	0.2668	2.02891	0.0255066	0.235051	0.162402	0.120155	0.337387	31.9975	0.076	0.076	0.0358983	0.275891	0.207821	0.1833	0.04505	32.0458	0.259961	0.19803	4.45643	1	0.275108
2023	GAS	Dịch vụ tiện ích	0	0.9576	0.9576	-0.305915	0.305915	0.1362	0.1873	2.03823	0.0222746	0.275891	0.167271	0.162402	0.259961	32.0458	0.105	-0.105	0.0150292	-0.130284	0.236287	0.1362	0.0428266	32.1056	0.255894	0.222577	4.15562	1	-0.106923
2024	GAS	Dịch vụ tiện ích	0	0.9576	0.9576	-0.263825	0.263825	0.1226	0.1639	2.19681	0.0274062	-0.130284	0.10296	0.167271	0.255894	32.1056	0.061	-0.061	0.0899399	0.155094	0.207643	0.1226	0.0265091	32.036	0.247803	0.222609	3.93061	1	0.151302
2020	GDT	Tiêu dùng không thiết yếu	0.1141	0.3478	0	-0.533091	0.533091	0.2034	0.2914	2.60316	0.149483	0.151167	0.184815	0.184815	0.321734	26.7119	0.05	0.050	-0.132915	0.151167	0.253412	0.2034	0.184815	26.7119	0.321734	0.246117	2.38987	0	0.171302
2021	GDT	Tiêu dùng không thiết yếu	0.1244	0.3267	0	-0.256909	0.256909	0.1559	0.2268	1.78063	0.0126271	0.151167	0.0861146	0.184815	0.321734	26.7119	0.011	0.011	0.0249854	-0.154879	0.242722	0.1559	0.0218431	26.666	0.303367	0.254124	2.05366	0	-0.154282
2022	GDT	Tiêu dùng không thiết yếu	0.1129	0.3267	0	-0.368733	0.368733	0.176	0.2475	1.41313	0.0451861	-0.154879	0.00265507	0.0861146	0.303367	26.666	0.026	0.026	-0.0694551	0.16047	0.254294	0.176	0.000648535	26.7296	0.275009	0.23861	2.74018	0	0.180532
2023	GDT	Tiêu dùng không thiết yếu	0.1119	0.352	0	-0.305591	0.305591	0.0901	0.1252	1.76842	0.0139795	0.16047	0.0785948	0.00265507	0.275009	26.7296	0.06	0.060	-0.200595	-0.218633	0.317005	0.0901	0.0202739	26.7368	0.286743	0.314756	2.37287	0	-0.222048
2024	GDT	Tiêu dùng không thiết yếu	0.3492	0.2847	0	-0.658112	0.658112	0.1177	0.1861	1.65103	0.038508	-0.218633	0.263659	0.0785948	0.286743	26.7368	0.014	0.014	-0.258359	0.0602598	0.202066	0.1177	0.0661495	26.9852	0.431217	0.157611	1.60793	0	0.0792314
2020	GEG	Dịch vụ tiện ích	0.0073	0.7425	0	-0.198347	0.198347	0.0354	0.0957	1.28124	0.145385	0.0493772	0.0621831	0.0621831	0.553857	29.6817	0.101	-0.101	-0.0397831	0.0493772	0.794709	0.0354	0.0621831	29.6817	0.553857	0.69146	1.61597	1	0.288043
2021	GEG	Dịch vụ tiện ích	0.0121	0.7315	0	-0.42166	0.42166	0.0279	0.0879	1.07046	0.747038	0.0493772	0.327086	0.0621831	0.553857	29.6817	0.069	0.069	-0.315486	-0.014435	1.3501	0.0279	0.0874524	30.1546	0.70033	0.8414	1.49953	1	-0.0751375
2022	GEG	Dịch vụ tiện ích	0.0102	0.7201	0	-0.122026	0.122026	0.0213	0.0825	0.968879	0.317919	-0.014435	0.0397568	0.327086	0.70033	30.1546	0.217	-0.217	-0.0352568	0.0570939	0.798986	0.0213	0.0122463	30.4712	0.671125	0.582159	1.02309	1	0.515607
2023	GEG	Dịch vụ tiện ích	0.009	0.7582	0	-0.126408	0.126408	0.0083	0.0318	0.921473	0.0971583	0.0570939	0.0621087	0.0397568	0.671125	30.4712	0.068	-0.068	0.00439131	0.00410227	0.821806	0.0083	0.0179648	30.4118	0.6425	0.872023	0.868578	1	0.0335478
2024	GEG	Dịch vụ tiện ích	0.0086	0.8296	0	-0.11869	0.11869	0.0073	0.016	0.903464	0.175374	0.00410227	0.0565735	0.0621087	0.6425	30.4118	0.054	-0.054	-0.0262735	0.0100331	0.824197	0.0073	0.0137241	30.3506	0.620096	0.876277	1.75978	1	0.0748147
2020	GEX	Công nghiệp	0.1321	0.2487	0	-0.0988501	0.0988501	0.0331	0.1212	1.38434	0.151574	0.123871	0.0175583	0.0175583	0.697438	30.9325	0.007	0.007	0.101142	0.123871	0.276392	0.0331	0.0175583	30.9325	0.697438	0.216433	1.20678	1	0.171971
2021	GEX	Công nghiệp	0.2472	0.3588	0	0.21821	0.21821	0.0235	0.11	0.855656	0.216935	0.123871	-0.0925808	0.0175583	0.697438	30.9325	0.032	-0.032	0.113181	0.391487	0.63606	0.0235	-0.0259611	31.745	0.66501	0.282245	1.29724	1	0.592226
2022	GEX	Công nghiệp	0.2569	0.2375	0	-0.278583	0.278583	0.0065	0.0306	0.954269	0.0596525	0.391487	0.129389	-0.0925808	0.66501	31.745	0.056	-0.056	-0.113889	0.0573687	0.277076	0.0065	0.0448105	31.5896	0.598293	0.323645	1.14611	1	0.122832
2023	GEX	Công nghiệp	0.2417	0.2375	0	-0.197877	0.197877	0.0061	0.027	0.908395	0.125942	0.0573687	0.0844878	0.129389	0.598293	31.5896	0.019	0.019	-0.163388	-0.0399145	0.358872	0.0061	0.0194845	31.6398	0.614652	0.341331	1.09188	1	-0.0651604
2024	GEX	Công nghiệp	0.2448	0.2363	0	-0.165151	0.165151	0.03	0.0733	0.872768	0.0790132	-0.0399145	0.0455587	0.0844878	0.614652	31.6398	0.021	0.021	-0.0445587	0.0681678	0.251865	0.03	0.011675	31.616	0.567554	0.257928	1.34309	1	0.125158
2020	GIL	Tiêu dùng không thiết yếu	0.1749	0.2351	0	-0.529034	0.529034	0.1341	0.2943	1.42089	0.0448834	0.483758	0.132136	0.132136	0.523737	28.6274	0.143	0.143	-0.0229362	0.483758	0.0976911	0.1341	0.132136	28.6274	0.523737	0.0684724	1.52583	0	0.361805
2021	GIL	Tiêu dùng không thiết yếu	0.1642	0.2524	0	-0.224592	0.224592	0.102	0.2346	0.788019	0.0340179	0.483758	0.042264	0.132136	0.523737	28.6274	0.11	-0.110	0.055036	0.256068	0.0956908	0.102	0.0124239	28.957	0.572351	0.0688259	1.51243	0	0.200644
2022	GIL	Tiêu dùng không thiết yếu	0.137	0.1554	0	0.0705183	0.0705183	0.0933	0.1817	0.874557	-0.0771682	0.256068	-0.0246691	0.042264	0.572351	28.957	0.172	-0.172	0.126669	-0.261205	0.0678805	0.0933	-0.00717438	29.0144	0.370249	0.064093	2.62617	0	-0.237005
2023	GIL	Tiêu dùng không thiết yếu	0.1416	0.1404	0	0.132925	0.132925	0.0077	0.0116	0.695852	0.0114232	-0.261205	-0.0800605	-0.0246691	0.370249	29.0144	0.05	0.050	0.15936	-0.5592	0.0624956	0.0077	-0.0205895	28.8421	0.242344	0.0742454	4.47885	0	-0.704297
2024	GIL	Tiêu dùng không thiết yếu	0.133	0.1597	0	0.0812396	0.0812396	0.0079	0.0102	0.862786	-0.000253463	-0.5592	-0.0629026	-0.0800605	0.242344	28.8421	0.138	0.138	0.109103	-0.067171	0.0709157	0.0079	-0.0143744	28.8134	0.215005	0.0729796	6.41422	0	-0.240821
2020	GMD	Công nghiệp	0.0219	0.0694	0	-0.180657	0.180657	0.0372	0.063	1.59045	0.00709699	-0.00368062	0.0647599	0.0647599	0.329412	29.9169	0.009	-0.009	-0.0144599	-0.00368062	0.310583	0.0372	0.0647599	29.9169	0.329412	0.319595	0.777212	0	-0.0140934
2021	GMD	Công nghiệp	0.0174	0.0688	0	-0.234437	0.234437	0.0595	0.1002	1.68456	0.0496953	-0.00368062	0.0981049	0.0647599	0.329412	29.9169	0.065	0.065	-0.0331049	0.0610729	0.319891	0.0595	0.0241755	30.0042	0.343539	0.293162	0.746658	0	0.230507
2022	GMD	Công nghiệp	0.0173	0.0985	0	-0.406215	0.406215	0.0837	0.1501	1.9975	0.126853	0.0610729	0.214257	0.0981049	0.343539	30.0042	0.304	-0.304	-0.137757	0.0644805	0.303996	0.0837	0.0558997	30.1983	0.390072	0.250352	0.815656	0	0.215811
2023	GMD	Công nghiệp	0.0174	0.0802	0	-0.158902	0.158902	0.1694	0.2903	1.76744	-0.0975125	0.0644805	-0.000220274	0.214257	0.390072	30.1983	0.065	-0.065	0.15182	-0.00402262	0.31971	0.1694	-6.03976e-05	30.2371	0.281533	0.307546	1.76481	0	-0.0134464
2024	GMD	Công nghiệp	0.0195	0.126	0	-0.302583	0.302583	0.0923	0.1238	1.73452	0.00468765	-0.00402262	0.112714	-0.000220274	0.281533	30.2371	0.165	-0.165	0.0055863	0.0728035	0.297738	0.0923	0.0287249	30.5213	0.234802	0.224091	3.17674	0	0.256433
2020	GMH	Nguyên vật liệu	0	0	0	-0.309402	0.309402	0.0622	0.0675	2.077	0.00225477	0.169004	0.121744	0.121744	0.0581546	25.9179	0.053	-0.053	-0.0875435	0.169004	0.0593616	0.0622	0.121744	25.9179	0.0581546	0.0311947	16.525	0	0.156493
2021	GMH	Nguyên vật liệu	0.3835	0.6472	0	-0.44626	0.44626	0.142	0.1498	0.804077	0.00660727	0.169004	0.264534	0.121744	0.0581546	25.9179	0.06	-0.060	-0.231034	0.260157	0.203451	0.142	0.0867039	26.0718	0.0469469	0.174429	17.4	1	0.396382
2022	GMH	Nguyên vật liệu	0.3905	0.539	0	-0.251724	0.251724	0.1239	0.1324	0.876349	0.00824352	0.260157	0.108522	0.264534	0.0469469	26.0718	0.078	0.078	-0.0456219	-0.0662664	0.157126	0.1239	0.0292142	26.0194	0.0834553	0.165578	9.91219	0	-0.0843354
2023	GMH	Nguyên vật liệu	0.3833	0.539	0	-0.0310991	0.0310991	0.0691	0.0738	0.714316	0.00796165	-0.0662664	-0.00796937	0.108522	0.0834553	26.0194	0.07	-0.070	0.0122694	-0.189127	0.148399	0.0691	-0.00194016	26.008	0.0452667	0.150108	18.6306	0	-0.249448
2024	GMH	Nguyên vật liệu	0.3697	0.5392	0	-0.181327	0.181327	0.0312	0.0325	0.725836	0.00607886	-0.189127	0.0580514	-0.00796937	0.0452667	26.008	0.004	-0.004	-0.0456514	-0.129284	0.124714	0.0312	0.0144298	25.9413	0.036614	0.133307	23.5501	0	-0.224605
2020	GSP	Năng lượng	0.0006	0.7613	0.6774	-0.171557	0.171557	0.0674	0.1313	1.02767	9.1411e-05	0.173132	0.152836	0.152836	0.473659	27.5001	0.108	0.108	-0.0548358	0.173132	0.533333	0.0674	0.152836	27.5001	0.473659	0.548697	1.70408	1	0.112334
2021	GSP	Năng lượng	0.0002	0.6798	0.6798	-0.0263836	0.0263836	0.0515	0.1001	0.90185	0.367028	0.173132	0.0452738	0.152836	0.473659	27.5001	0.239	0.239	0.0631262	0.0961761	0.860842	0.0515	0.0111577	27.8925	0.493705	0.581442	1.6475	1	0.0545296
2022	GSP	Năng lượng	0	0.6798	0.6798	-0.181908	0.181908	0.0582	0.1166	0.959399	0.258837	0.0961761	0.140527	0.0452738	0.493705	27.8925	0.015	0.015	-0.0816274	0.164144	0.756798	0.0582	0.0419376	28.0324	0.507458	0.657938	1.53904	1	0.130662
2023	GSP	Năng lượng	0	0.6774	0.6774	-0.139233	0.139233	0.0562	0.1133	1.0054	0.000427714	0.164144	0.137217	0.140527	0.507458	28.0324	0.067	-0.067	-0.0876165	-0.0532987	0.578645	0.0562	0.0367013	28.0507	0.501137	0.568155	1.41788	1	-0.0431621
2024	GSP	Năng lượng	0	0.6798	0.6798	-0.200935	0.200935	0.0626	0.1249	1.0129	0.130534	-0.0532987	0.137405	0.137217	0.501137	28.0507	0.123	0.123	-0.0729054	0.316679	0.696592	0.0626	0.0346656	28.1571	0.496057	0.626298	1.40858	1	0.272969
2020	GTA	Nguyên vật liệu	0.0091	0.7498	0.597	-0.151728	0.151728	0.0346	0.1085	1.02193	0.0116243	-0.171213	0.0435768	0.0435768	0.667032	26.9546	0.073	-0.073	-0.00377679	-0.171213	0.0631845	0.0346	0.0435768	26.9546	0.667032	0.0684642	1.37587	0	-0.142363
2021	GTA	Nguyên vật liệu	0	0.7194	0.6315	0.131786	0.131786	0.0321	0.0931	0.911187	0.00399198	-0.171213	-0.065941	0.0435768	0.667032	26.9546	0.018	-0.018	0.127941	-0.112886	0.0643455	0.0321	-0.0158241	26.8712	0.642161	0.0699404	1.43534	0	-0.101005
2022	GTA	Nguyên vật liệu	0.003	0.6847	0.597	-0.120963	0.120963	0.0243	0.0622	0.957241	0.0162912	-0.112886	0.044041	-0.065941	0.642161	26.8712	0.135	-0.135	0.016459	-0.0456044	0.0753464	0.0243	0.0105515	26.6532	0.567371	0.0937032	1.58043	0	-0.0417585
2023	GTA	Nguyên vật liệu	0.003	0.6847	0.597	0.0700948	0.0700948	0.0289	0.0633	0.83541	0.00082054	-0.0456044	-0.050992	0.044041	0.567371	26.6532	0.066	-0.066	0.105292	-0.638872	0.0768105	0.0289	-0.0113637	26.5465	0.518541	0.0854597	1.7374	0	-0.490891
2024	GTA	Nguyên vật liệu	0.003	0.7329	0.1075	0.101353	0.101353	0.026	0.0528	0.816123	0.0152584	-0.638872	-0.103423	-0.050992	0.518541	26.5465	0.023	-0.023	0.156723	0.0360285	0.0842304	0.026	-0.0244776	26.4906	0.496326	0.0890734	1.80407	0	0.0488726
2020	GVR	Nguyên vật liệu	0.0001	0.9677	0.9677	-0.0701172	0.0701172	0.0475	0.0799	1.90896	0.00779289	0.0167138	-0.0108524	-0.0108524	0.359345	32.0165	0.094	-0.094	0.0620524	0.0167138	0.389245	0.0475	-0.0108524	32.0165	0.359345	0.380706	2.01241	0	0.0662654
2021	GVR	Nguyên vật liệu	0.0001	0.9677	0.9677	-0.128327	0.128327	0.0522	0.0871	1.07923	0.00771888	0.0167138	0.0488436	-0.0108524	0.359345	32.0165	0.009	-0.009	-0.0104436	0.0631962	0.405577	0.0522	0.0123463	32.0006	0.342649	0.412065	2.0953	0	0.240254
2022	GVR	Nguyên vật liệu	0.0002	0.9677	0.9677	-0.0875472	0.0875472	0.0488	0.0792	1.48802	0.00181838	0.0631962	0.0169931	0.0488436	0.342649	32.0006	0.002	0.002	-0.00419312	-0.0097222	0.430058	0.0488	0.00421457	31.9935	0.31782	0.433163	2.25683	0	-0.0293319
2023	GVR	Nguyên vật liệu	0.0002	0.9677	0.9677	-0.114666	0.114666	0.0335	0.053	1.89445	0.00464897	-0.0097222	0.0414098	0.0169931	0.31782	31.9935	0.149	-0.149	-0.0337098	-0.0418494	0.438995	0.0335	0.0103152	31.9885	0.295725	0.441165	2.47005	0	-0.129143
2024	GVR	Nguyên vật liệu	0	0.9677	0.9677	-0.0921433	0.0921433	0.0494	0.0704	1.75558	0.00969751	-0.0418494	0.00555957	0.0414098	0.295725	31.9885	0.086	-0.086	0.0932404	0.0525677	0.45268	0.0494	0.00138647	32.0545	0.299657	0.42379	2.38659	0	0.185358
2020	HAG	Tiêu dùng thiết yếu	0.3718	0.3685	0	-0.00892447	0.00892447	-0.0354	-0.1976	1.10174	0.0428613	0.0327978	-0.0525425	-0.0525425	0.730912	31.2491	0.036	-0.036	0.205242	0.0327978	0.376057	-0.0354	-0.0525425	31.2491	0.730912	0.338816	0.578805	1	0.530586
2021	HAG	Tiêu dùng thiết yếu	0.3458	0.345	0	-0.0387145	0.0387145	0.0073	0.0425	1.20628	-0.059999	0.0327978	-0.0171813	-0.0525425	0.730912	31.2491	0.079	-0.079	0.159581	-0.0289603	0.0753954	0.0073	-0.00451909	30.5455	0.746567	0.152371	1.04402	1	-0.339738
2022	HAG	Tiêu dùng thiết yếu	0.3457	0.345	0	0.0444241	0.0444241	0.059	0.2381	1.43796	-0.00175935	-0.0289603	0.00202473	-0.0171813	0.746567	30.5455	0.133	0.133	-0.0322247	0.163417	0.207224	0.059	0.000335114	30.6166	0.737618	0.193003	0.872044	1	1.4367
2023	HAG	Tiêu dùng thiết yếu	0.3457	0.345	0	-0.0775421	0.0775421	0.0818	0.2931	1.23517	0.0222715	0.163417	0.00510717	0.00202473	0.737618	30.6166	0.232	0.232	0.00679283	0.0672588	0.302948	0.0818	0.00132216	30.6709	0.680554	0.286935	0.903003	1	0.26055
2024	HAG	Tiêu dùng thiết yếu	0.3035	0.3026	0	-0.0746203	0.0746203	0.0469	0.1267	1.15332	-0.0553335	0.0672588	-0.0374478	0.00510717	0.680554	30.6709	0.218	0.218	0.0393478	-0.0315428	0.314162	0.0469	-0.00961608	30.7347	0.58145	0.294738	0.758382	1	-0.102345
2020	HAP	Nguyên vật liệu	0.2471	0.1295	0	-0.118685	0.118685	0.0498	0.058	1.02408	-0.039245	-0.052331	0.0277079	0.0277079	0.112017	27.418	0.011	-0.011	-0.0258079	-0.052331	0.0789387	0.0498	0.0277079	27.418	0.112017	0.0793076	4.76809	0	-0.112699
2021	HAP	Nguyên vật liệu	0.2236	0.1291	0	-0.101874	0.101874	0.0528	0.0596	0.412933	0.00714721	-0.052331	-0.0195642	0.0277079	0.112017	27.418	0.073	-0.073	0.0247642	0.201905	0.0623985	0.0528	-0.00487965	27.4147	0.0993884	0.062605	5.72991	0	0.487769
2022	HAP	Nguyên vật liệu	0.2574	0.1293	0	-0.38896	0.38896	0.0062	0.0068	0.456376	0.493523	0.201905	-0.0271263	-0.0195642	0.0993884	27.4147	0.05	-0.050	0.118126	0.167761	0.0503439	0.0062	-0.00677038	27.9124	0.0631374	0.030603	9.66595	0	0.271511
2023	HAP	Nguyên vật liệu	0.2574	0.1293	0	-0.02737	0.02737	0.0136	0.0145	0.435555	-0.199492	0.167761	-0.0100526	-0.0271263	0.0631374	27.9124	0.113	-0.113	0.0621526	-0.251315	0.0239249	0.0136	-0.00312606	27.8742	0.055721	0.0248585	10.9424	0	-0.526234
2024	HAP	Nguyên vật liệu	0.3517	0.3735	0	-0.523542	0.523542	0.0689	0.0767	0.430887	0.0166901	-0.251315	0.412678	-0.0100526	0.055721	27.8742	0.082	-0.082	-0.381978	0.0938513	0.300813	0.0689	0.101195	28.1462	0.135286	0.229175	2.98599	0	0.39922
2020	HAX	Tiêu dùng không thiết yếu	0.4563	0.4029	0	-0.349652	0.349652	0.0871	0.2516	1.41241	-0.0317792	0.255255	0.258685	0.258685	0.565633	27.84	0.009	-0.009	-0.252085	0.255255	0.152276	0.0871	0.258685	27.84	0.565633	0.201681	1.32545	0	0.0808527
2021	HAX	Tiêu dùng không thiết yếu	0.3729	0.3592	0	-0.245771	0.245771	0.1276	0.2584	1.1342	0.0347499	0.255255	0.272567	0.258685	0.565633	27.84	0.054	-0.054	-0.380467	-0.01466	0.212298	0.1276	0.0586306	27.8757	0.444099	0.204843	1.66152	0	-0.00324382
2022	HAX	Tiêu dùng không thiết yếu	0.361	0.3297	0	0.781875	0.781875	0.1242	0.2937	0.936723	0.310087	-0.01466	-0.520502	0.272567	0.444099	27.8757	0.006	-0.006	0.624002	0.958111	0.330163	0.1242	-0.132451	28.5783	0.624253	0.163531	1.11272	0	0.22043
2023	HAX	Tiêu dùng không thiết yếu	0.3062	0.398	0	-0.245181	0.245181	0.0151	0.034	1.18353	-7.47563e-05	0.958111	0.167904	-0.520502	0.624253	28.5783	0.072	-0.072	-0.166604	-1.08323	0.147872	0.0151	0.0561439	28.3273	0.419822	0.190058	1.27677	0	-0.41228
2024	HAX	Tiêu dùng không thiết yếu	0.392	0.4996	0	-0.419377	0.419377	0.0566	0.0942	1.13714	0.0393851	-1.08323	0.180855	0.167904	0.419822	28.3273	0.003	-0.003	-0.149855	0.763283	0.229213	0.0566	0.0395696	28.5102	0.381184	0.190894	1.43367	0	0.38458
2020	HCD	Công nghiệp	0.1679	0.1418	0	0.191072	0.191072	0.0031	0.0042	1.1439	0	-0.470827	-0.00503224	-0.00503224	0.263225	26.8609	0.123	0.123	0.0125322	-0.470827	0.161251	0.0031	-0.00503224	26.8609	0.263225	0.159134	3.1516	0	-0.302578
2021	HCD	Công nghiệp	0.1679	0.1418	0	0.0704496	0.0704496	0.0927	0.1316	0.624413	0.0251071	-0.470827	0.0117941	-0.00503224	0.263225	26.8609	0.052	-0.052	-0.0173941	0.511263	0.148658	0.0927	0.002968	27.0412	0.322961	0.12413	2.61748	0	0.477379
2022	HCD	Công nghiệp	0.3441	0.2684	0	0.2713	0.2713	0.0614	0.1016	0.771532	-0.0236293	0.511263	-0.0366558	0.0117941	0.322961	27.0412	0.027	-0.027	-0.219044	0.0216907	0.116321	0.0614	-0.00998796	27.3508	0.450039	0.0853479	1.56007	0	0.0164177
2023	HCD	Công nghiệp	0.2941	0.2684	0	-0.0165405	0.0165405	0.0676	0.1196	0.84473	-0.0297955	0.0216907	0.0189763	-0.0366558	0.450039	27.3508	0.052	0.052	-0.0159763	0.223033	0.2574	0.0676	0.00547268	27.3806	0.419816	0.249844	1.761	0	0.226361
2024	HCD	Công nghiệp	0.2684	0.3888	0	-0.0374309	0.0374309	0.038	0.0647	0.808947	-0.00261946	0.223033	0.0781529	0.0189763	0.419816	27.3806	0.101	-0.101	-0.123553	-0.0562198	0.251429	0.038	0.0198292	27.4228	0.406595	0.241041	1.84415	0	-0.0479338
2020	HDC	Bất động sản	0.1528	0.0935	0	0.0215837	0.0215837	0.0794	0.2256	2.31402	0.162494	0.0058575	0.11257	0.11257	0.657251	28.8347	0.131	-0.131	-0.0745696	0.0058575	0.34574	0.0794	0.11257	28.8347	0.657251	0.255582	1.21929	0	0.0174993
2021	HDC	Bất động sản	0.16	0.095	0	0.0297364	0.0297364	0.087	0.2395	1.30308	0.0151053	0.0058575	-0.0927778	0.11257	0.657251	28.8347	0.109	-0.109	0.123678	0.154054	0.102386	0.087	-0.0266721	28.9599	0.607089	0.0903337	1.81761	0	0.611879
2022	HDC	Bất động sản	0.1573	0.0984	0	-0.334926	0.334926	0.1023	0.254	1.33626	0.125914	0.154054	0.0228321	-0.0927778	0.607089	28.9599	0.13	-0.130	-0.0107321	-0.0143747	0.086733	0.1023	0.00606499	29.1176	0.578508	0.0740824	1.43002	0	-0.040147
2023	HDC	Bất động sản	0.1573	0.0984	0	-0.0800939	0.0800939	0.0289	0.0706	1.35014	0.0469275	-0.0143747	0.0408158	0.0228321	0.578508	29.1176	0.051	-0.051	-0.0161158	-0.143057	0.0713167	0.0289	0.0110067	29.1783	0.593943	0.067112	1.01589	0	-0.487333
2024	HDC	Bất động sản	0.1587	0.0985	0	0.0323807	0.0323807	0.0138	0.0316	1.45018	0.0514534	-0.143057	-0.0282981	0.0408158	0.593943	29.1783	0.028	-0.028	0.113998	-0.025374	0.0643128	0.0138	-0.0072894	29.2156	0.534153	0.0619591	1.08336	0	-0.179169
2020	HDG	Dịch vụ tiện ích	0.4512	0.5211	0	-0.362791	0.362791	0.0706	0.3601	1.34703	0.155809	0.0473133	0.102827	0.102827	0.713414	30.2614	0.101	-0.101	0.0132726	0.0473133	0.30163	0.0706	0.102827	30.2614	0.713414	0.301362	1.03842	1	0.151078
2021	HDG	Dịch vụ tiện ích	0.35	0.6313	0	-0.260726	0.260726	0.0737	0.2983	1.05496	0.14141	0.0473133	0.0761554	0.102827	0.713414	30.2614	0.094	0.094	0.0326446	-0.0879871	0.71103	0.0737	0.0190473	30.3968	0.660805	0.620968	0.95882	1	-0.244298
2022	HDG	Dịch vụ tiện ích	0.402	0.5935	0	-0.247394	0.247394	0.0707	0.2274	0.994824	0.0292337	-0.0879871	0.122203	0.0761554	0.660805	30.3968	0.029	0.029	-0.0208026	-0.012349	0.597479	0.0707	0.0326163	30.346	0.566498	0.628594	1.17324	1	-0.051952
2023	HDG	Dịch vụ tiện ích	0.4019	0.5657	0	-0.178979	0.178979	0.045	0.1185	1.13887	0.0127186	-0.012349	0.0525409	0.122203	0.566498	30.346	0.041	-0.041	0.0636591	-0.0458001	0.598111	0.045	0.0128019	30.3009	0.499337	0.625724	1.44024	1	-0.193178
2024	HDG	Dịch vụ tiện ích	0.0043	0.4574	0	-0.209425	0.209425	0.0246	0.0477	1.15954	0.0997636	-0.0458001	0.0727484	0.0525409	0.499337	30.3009	0.064	0.064	0.0782516	-0.0118968	0.59204	0.0246	0.0177768	30.2593	0.467414	0.617218	1.50832	1	-0.0594489
2020	HHP	Nguyên vật liệu	0.2442	0.2433	0	-0.194233	0.194233	0.049	0.1038	0.933458	0.236081	0.292354	0.145927	0.145927	0.537642	26.9383	0.01	-0.010	-0.122027	0.292354	0.457046	0.049	0.145927	26.9383	0.537642	0.348022	1.0925	0	0.302469
2021	HHP	Nguyên vật liệu	0.2488	0.2349	0	0.00382874	0.00382874	0.0565	0.1178	0.800853	0.270663	0.292354	-0.0149295	0.145927	0.537642	26.9383	0.037	-0.037	0.14183	0.623423	0.324406	0.0565	-0.00423783	27.2739	0.449322	0.231921	1.49362	0	0.650341
2022	HHP	Nguyên vật liệu	0.3486	0.2349	0	0.0162139	0.0162139	0.0433	0.0976	0.87948	0.334963	0.623423	0.0382744	-0.0149295	0.449322	27.2739	0.025	0.025	-0.0369744	0.220023	0.227488	0.0433	0.0111593	27.6185	0.555202	0.161184	1.3453	0	0.194536
2023	HHP	Nguyên vật liệu	0.1964	0.2157	0	0.129198	0.129198	0.0137	0.0382	0.891217	0.503948	0.220023	-0.0404255	0.0382744	0.555202	27.6185	0.006	-0.006	0.0414255	0.166065	0.152871	0.0137	-0.0118304	28.3625	0.63185	0.072647	0.59637	0	0.173479
2024	HHP	Nguyên vật liệu	0.2142	0.2488	0	0.306834	0.306834	0.0075	0.0208	0.889294	0.0781226	0.166065	-0.199107	-0.0404255	0.63185	28.3625	0.016	-0.016	0.0537071	0.366268	0.106185	0.0075	-0.067484	28.687	0.64091	0.0767551	1.16535	0	0.68612
2020	HHS	Tiêu dùng không thiết yếu	0.0539	0.5106	0	-0.277891	0.277891	0.075	0.081	0.703421	0.677196	0.00415861	0.222632	0.222632	0.051831	29.0039	0.089	0.089	-0.105732	0.00415861	0.00722694	0.075	0.222632	29.0039	0.051831	0.00664292	4.3604	0	0.0255528
2021	HHS	Tiêu dùng không thiết yếu	0	0.4567	0	0.0440116	0.0440116	0.0567	0.0618	0.352365	-0.000172758	0.00415861	-0.020693	0.222632	0.051831	29.0039	0.055	-0.055	0.041593	-0.0225809	0.00645674	0.0567	-0.00539109	29.0815	0.0757784	0.00597445	2.75949	0	-0.147187
2022	HHS	Tiêu dùng không thiết yếu	0	0.5106	0	0.0808508	0.0808508	0.0507	0.0558	0.62289	0.0137392	-0.0225809	-0.0391793	-0.020693	0.0757784	29.0815	0.013	0.013	0.0646793	-0.0307292	0.00542847	0.0507	-0.0101748	29.1335	0.0726651	0.00515378	3.9079	0	-0.253829
2023	HHS	Tiêu dùng không thiết yếu	0	0.5106	0	-0.0598439	0.0598439	0.076	0.0817	0.591008	0.0572498	-0.0307292	0.0184519	-0.0391793	0.0726651	29.1335	0.015	0.015	-0.0173519	-0.00416685	0.00158335	0.076	0.00473272	29.1729	0.0368689	0.00152203	6.03797	0	-0.048586
2024	HHS	Tiêu dùng không thiết yếu	0	0.6498	0	-0.0487356	0.0487356	0.0724	0.0786	0.613652	0.0952658	-0.00416685	0.062182	0.0184519	0.0368689	29.1729	0.032	0.032	-0.045082	0.0437886	0.00616036	0.0724	0.0158525	29.3315	0.115101	0.00525692	2.47303	0	0.558275
2020	HII	Nguyên vật liệu	0.0028	0.6354	0	0.0873448	0.0873448	0.0263	0.0913	0.964453	0.0181179	-0.313648	-0.104048	-0.104048	0.625439	28.0566	0.061	0.061	-0.0748521	-0.313648	0.21366	0.0263	-0.104048	28.0566	0.625439	0.244298	1.0806	1	-0.118503
2021	HII	Nguyên vật liệu	0	0.5051	0	-0.230952	0.230952	0.0427	0.1541	0.77577	0.0526936	-0.313648	-0.0562986	-0.104048	0.625439	28.0566	0.013	0.013	0.154399	2.73286	0.215995	0.0427	-0.0131331	28.4304	0.708042	0.148623	1.15245	1	1.02444
2022	HII	Nguyên vật liệu	0	0.5485	0	0.278841	0.278841	-0.022	-0.0752	0.801337	0.0960521	2.73286	-0.0750629	-0.0562986	0.708042	28.4304	0.186	-0.186	0.138663	1.07911	0.1305	-0.022	-0.0222331	28.5014	0.62981	0.121562	1.23302	1	0.290394
2023	HII	Nguyên vật liệu	0	0.5485	0	-0.182039	0.182039	0.0324	0.0832	0.666124	0.0299803	1.07911	0.129424	-0.0750629	0.62981	28.5014	0.104	-0.104	-0.097424	-1.16587	0.104487	0.0324	0.0335034	28.269	0.490988	0.131817	1.4396	1	-0.261015
2024	HII	Nguyên vật liệu	0	0.451	0	-0.0378282	0.0378282	0.0016	0.0032	0.665936	0.061936	-1.16587	-0.0440183	0.129424	0.490988	28.269	0.011	0.011	0.0741183	-0.356834	0.125966	0.0016	-0.00973186	28.2875	0.49591	0.123664	1.62296	1	-0.0856917
2020	HPG	Nguyên vật liệu	0.3549	0.3944	0	-0.191264	0.191264	0.1153	0.2521	1.65823	0.116739	0.259986	0.11385	0.11385	0.549699	32.5101	0.011	0.011	-0.0118505	0.259986	0.644176	0.1153	0.11385	32.5101	0.549699	0.498524	1.09181	1	0.415662
2021	HPG	Nguyên vật liệu	0.3463	0.3342	0	-0.358469	0.358469	0.2226	0.4606	0.991327	0.0816529	0.259986	0.203183	0.11385	0.549699	32.5101	0.004	0.004	-0.0719832	0.452898	0.526805	0.2226	0.0572704	32.8141	0.490673	0.388702	1.28173	1	0.660922
2022	HPG	Nguyên vật liệu	0.3451	0.3342	0	-0.146356	0.146356	0.0487	0.0909	1.39159	0.102284	0.452898	0.068884	0.203183	0.490673	32.8141	0.457	0.457	0.016316	-0.0464019	0.39741	0.0487	0.0198188	32.7688	0.435743	0.415843	1.2906	1	-0.0552547
2023	HPG	Nguyên vật liệu	0.3448	0.3268	0	-0.0661544	0.0661544	0.0382	0.0688	1.28843	0.103875	-0.0464019	0.0507412	0.068884	0.435743	32.7688	0.143	0.143	0.0584588	-0.131835	0.422686	0.0382	0.0123978	32.8663	0.452364	0.383413	1.15666	1	-0.158803
2024	HPG	Nguyên vật liệu	0.3418	0.3268	0	-0.0329102	0.0329102	0.0583	0.1106	1.24862	0.0949413	-0.131835	0.0351913	0.0507412	0.452364	32.8663	0.091	-0.091	-0.0350913	0.105985	0.359077	0.0583	0.00922645	33.0449	0.489297	0.300363	1.1522	1	0.16731
2020	HPX	Bất động sản	0.4367	0.4876	0	0.106325	0.106325	0.013	0.0299	1.65635	-0.116748	-0.307821	-0.10761	-0.10761	0.509259	29.6296	0.005	0.005	0.10791	-0.307821	0.0189309	0.013	-0.10761	29.6296	0.509259	0.0175226	2.04062	1	-0.612572
2021	HPX	Bất động sản	0.4365	0.4876	0	0.557933	0.557933	0.0295	0.0763	0.789949	0.00391595	-0.307821	-0.404009	-0.10761	0.509259	29.6296	0.055	-0.055	0.373809	0.0118423	0.00966465	0.0295	-0.104904	29.8906	0.631809	0.00744482	1.91429	1	0.0657165
2022	HPX	Bất động sản	0.1971	0.4876	0	-0.0479352	0.0479352	0.0149	0.0414	0.810201	-0.0349098	0.0118423	0.0254554	-0.404009	0.631809	29.8906	0.096	-0.096	-0.0335554	-0.0215725	0.00652994	0.0149	0.00718952	29.8788	0.634775	0.00660689	1.6472	0	-0.145825
2023	HPX	Bất động sản	0.1389	0.2997	0	-0.147488	0.147488	0.0143	0.0384	0.74135	-0.0880374	-0.0215725	0.0255123	0.0254554	0.634775	29.8788	0.069	-0.069	0.0378877	0.0496357	0.00605819	0.0143	0.00634072	29.7469	0.56758	0.00691255	1.65869	0	0.38823
2024	HPX	Bất động sản	0.1388	0.1843	0	-0.173563	0.173563	0.0072	0.0159	0.712591	-0.0221767	0.0496357	0.0718858	0.0255123	0.56758	29.7469	0.017	-0.017	-0.0601858	-0.00778627	0.00658537	0.0072	0.0167877	29.6724	0.528154	0.00709444	1.64376	0	-0.0384475
2020	HQC	Bất động sản	0.1319	0.1478	0	-0.0695489	0.0695489	0.0014	0.0022	0.874955	-3.11245e-06	-0.0176038	0.0253677	0.0253677	0.377855	29.5727	0.187	-0.187	0.00653226	-0.0176038	0.000717624	0.0014	0.0253677	29.5727	0.377855	0.00069119	1.33423	0	-0.18008
2021	HQC	Bất động sản	0.0742	0.0592	0	-0.325423	0.325423	0.0005	0.001	0.670536	0.303874	-0.0176038	0.326057	0.0253677	0.377855	29.5727	0.145	-0.145	-0.305057	-0.0371758	0.00056303	0.0005	0.0830437	29.8639	0.534609	0.00042077	0.92573	0	-0.481558
2022	HQC	Bất động sản	0.0742	0	0	-0.0121301	0.0121301	0.0023	0.0043	0.670921	-3.73278e-05	-0.0371758	0.000889574	0.326057	0.534609	29.8639	0.446	0.446	0.0206104	-0.000326197	0.000349043	0.0023	0.000254552	29.6102	0.397613	0.000449842	1.3195	0	-0.0109057
2023	HQC	Bất động sản	0.0355	0	0	0.000672421	0.000672421	0.0007	0.0012	0.605139	0	-0.000326197	-0.00507006	0.000889574	0.397613	29.6102	0.089	-0.089	-0.0833299	0.002298	0.000357786	0.0007	-0.00110759	29.6188	0.402079	0.000354719	1.3689	0	0.0602706
2024	HQC	Bất động sản	0.0035	0.0867	0	0.324019	0.324019	0.0039	0.0069	0.644733	0.0483426	0.002298	-0.234444	-0.00507006	0.402079	29.6188	0.09	-0.090	0.259544	-0.0492008	0.000265652	0.0039	-0.0588634	29.9438	0.466079	0.000191954	2.08216	0	-1.22758
2020	HRC	Nguyên vật liệu	0.0002	0.6071	0.5506	-0.0241956	0.0241956	0.0085	0.0167	1.94626	0.0220911	0.0255236	0.00486953	0.00486953	0.494733	27.6925	0.092	0.092	0.14793	0.0255236	0.25687	0.0085	0.00486953	27.6925	0.494733	0.255717	0.842149	0	0.167313
2021	HRC	Nguyên vật liệu	0	0.5506	0.5506	0.213013	0.213013	0.0231	0.0406	2.30967	0.0120902	0.0255236	-0.217913	0.00486953	0.494733	27.6925	0	0.000	0.351513	-0.00338979	0.253366	0.0231	-0.0546007	27.4659	0.350028	0.317802	0.536056	0	-0.0191217
2022	HRC	Nguyên vật liệu	0	0.5506	0.5506	-0.0333827	0.0333827	0.0123	0.0185	2.2391	0.00739917	-0.00338979	0.00755796	-0.217913	0.350028	27.4659	0.063	0.063	0.103842	-0.00673054	0.311422	0.0123	0.00167633	27.4211	0.323788	0.325696	0.35682	0	-0.0308589
2023	HRC	Nguyên vật liệu	0	0.6888	0.5506	0.00100193	0.00100193	0.0208	0.0309	1.70345	0.00975874	-0.00673054	-0.018051	0.00755796	0.323788	27.4211	0.073	0.073	0.064751	0.00489854	0.321053	0.0208	-0.00441166	27.4313	0.325773	0.317802	0.376777	0	0.0221589
2024	HRC	Nguyên vật liệu	0	0.7388	0.5506	-0.0896922	0.0896922	0.0738	0.1063	1.75099	0.0190687	0.00489854	0.0602401	-0.018051	0.325773	27.4313	0.043	-0.043	-0.0111401	0.0379691	0.351603	0.0738	0.0151367	27.4637	0.28696	0.340379	0.63104	0	0.169751
2020	HSL	Tiêu dùng thiết yếu	0.1869	0.2579	0	0.0715006	0.0715006	0.0466	0.0495	0.664397	0.20319	-0.900266	0.109525	0.109525	0.053054	26.283	0.232	-0.232	-0.00392519	-0.900266	0.0410667	0.0466	0.109525	26.283	0.053054	0.0389047	9.24055	0	-0.4769
2021	HSL	Tiêu dùng thiết yếu	0.1955	0.1587	0	0.023113	0.023113	0.0545	0.0635	0.451766	0.113963	-0.900266	-0.00788953	0.109525	0.053054	26.283	0.07	-0.070	0.0164895	0.239332	0.0496616	0.0545	-0.00202571	26.5134	0.199826	0.0394397	2.54853	0	0.255836
2022	HSL	Tiêu dùng thiết yếu	0.2528	0.202	0	-0.131274	0.131274	0.038	0.0454	0.614234	0.649184	0.239332	0.298703	-0.00788953	0.199826	26.5134	0.065	0.065	-0.245203	0.492173	0.153178	0.038	0.0832426	26.9149	0.121827	0.10253	6.84626	0	0.527513
2023	HSL	Tiêu dùng thiết yếu	0.2332	0.202	0	-0.00994706	0.00994706	0.0243	0.0274	0.381809	-0.122961	0.492173	0.000815083	0.298703	0.121827	26.9149	0.004	0.004	-0.0174151	-0.156357	0.0945634	0.0243	0.000244131	26.8973	0.0833326	0.0962416	8.37847	0	-0.163905
2024	HSL	Tiêu dùng thiết yếu	0.2139	0.2021	0	-0.047278	0.047278	0.0142	0.0152	0.38285	0.0914483	-0.156357	0.0891432	0.000815083	0.0833326	26.8973	0.066	-0.066	-0.0960432	-0.521725	0.0874452	0.0142	0.0220898	26.8746	0.0484025	0.0894531	13.6252	0	-0.642716
2020	HT1	Nguyên vật liệu	0.0279	0.797	0.797	-0.205399	0.205399	0.0598	0.1132	1.22303	0.00858185	-0.0851427	0.121406	0.121406	0.46293	29.9377	0.125	-0.125	-0.124806	-0.0851427	0.615659	0.0598	0.121406	29.9377	0.46293	0.630868	0.504017	1	-0.09911
2021	HT1	Nguyên vật liệu	0.0283	0.797	0.797	-0.120285	0.120285	0.0392	0.0701	0.966676	0.0125396	-0.0851427	0.0733272	0.121406	0.46293	29.9377	0.007	0.007	-0.0721272	-0.0894661	0.58353	0.0392	0.0181081	29.8152	0.412523	0.659572	0.418781	0	-0.112813
2022	HT1	Nguyên vật liệu	0.028	0.797	0.797	-0.0957191	0.0957191	0.0282	0.05	0.969578	0.0216505	-0.0894661	0.0660207	0.0733272	0.412523	29.8152	0.1	-0.100	-0.111721	0.208671	0.612312	0.0282	0.0154955	29.8701	0.455238	0.579553	0.557638	1	0.262391
2023	HT1	Nguyên vật liệu	0.0001	0.797	0.797	-0.0888173	0.0888173	0.002	0.0036	0.955079	0.015672	0.208671	0.0514095	0.0660207	0.455238	29.8701	0.114	-0.114	-0.0492095	-0.199139	0.532909	0.002	0.0132056	29.7855	0.439581	0.579954	0.522086	1	-0.20957
2024	HT1	Nguyên vật liệu	0.0001	0.7969	0.7969	-0.139992	0.139992	0.0071	0.0124	0.950054	0.0135939	-0.199139	0.0663267	0.0514095	0.439581	29.7855	0.033	-0.033	0.0261733	-0.0191077	0.588346	0.0071	0.0158807	29.738	0.407137	0.616993	0.572285	1	-0.0233763
2020	HTG	Tiêu dùng không thiết yếu	0.0605	0.6496	0.6496	-0.16997	0.16997	0.0345	0.1341	1.14371	0.0588937	-0.562675	0.0921717	0.0921717	0.727056	28.1913	0.036	0.036	-0.0726717	-0.562675	0.416262	0.0345	0.0921717	28.1913	0.727056	0.421317	1.01714	1	-0.23447
2021	HTG	Tiêu dùng không thiết yếu	0.0816	0.6187	0.6187	-0.0214305	0.0214305	0.092	0.354	1.07038	0.0490115	-0.562675	0.00804254	0.0921717	0.727056	28.1913	0.33	-0.330	0.0198575	0.346752	0.384217	0.092	0.0019985	28.4815	0.72069	0.287451	1.16783	1	0.186485
2022	HTG	Tiêu dùng không thiết yếu	0.07	0.6187	0.6187	-0.287109	0.287109	0.1112	0.362	1.03799	0.0596636	0.346752	0.0872567	0.00804254	0.72069	28.4815	0.296	0.296	-0.0428567	0.561794	0.300262	0.1112	0.0249569	28.5119	0.626444	0.291258	1.30767	1	0.340371
2023	HTG	Tiêu dùng không thiết yếu	0.0711	0.6187	0.6187	-0.282491	0.282491	0.0699	0.2078	1.3583	0.0389789	0.561794	0.151128	0.0872567	0.626444	28.5119	0.008	-0.008	-0.0948279	-0.198219	0.275885	0.0699	0.0383571	28.5504	0.666308	0.265478	1.22193	1	-0.0923674
2024	HTG	Tiêu dùng không thiết yếu	0.0723	0.6187	0.6187	-0.317618	0.317618	0.1035	0.3191	1.27519	0.0464965	-0.198219	0.155388	0.151128	0.666308	28.5504	0.101	-0.101	-0.121088	0.160592	0.296448	0.1035	0.0395937	28.7034	0.683814	0.254399	1.17037	1	0.0856811
2020	HTI	Công nghiệp	0.0009	0.6381	0	-0.200343	0.200343	0.0355	0.1328	1.00332	0.010198	-0.00231403	0.07603	0.07603	0.726505	28.1369	0.02	0.020	0.00317004	-0.00231403	0.815299	0.0355	0.07603	28.1369	0.726505	0.862873	1.40847	0	-0.0107099
2021	HTI	Công nghiệp	0.0001	0.6286	0	-0.150021	0.150021	0.0225	0.079	0.969815	0.00657752	-0.00231403	0.05204	0.07603	0.726505	28.1369	0.101	-0.101	0.01146	-0.0248755	0.822767	0.0225	0.0126412	28.0732	0.702852	0.876886	0.230661	0	-0.109961
2022	HTI	Công nghiệp	0.0001	0.6666	0	-0.2467	0.2467	0.0361	0.1216	0.97596	0.00896747	-0.0248755	0.121923	0.05204	0.702852	28.0732	0.033	-0.033	-0.0937229	0.0574116	0.818504	0.0361	0.0295102	28.0431	0.704142	0.843523	0.25731	0	0.267541
2023	HTI	Công nghiệp	0	0.7195	0	-0.241723	0.241723	0.0395	0.1234	0.942029	-0.0819358	0.0574116	0.120261	0.121923	0.704142	28.0431	0.044	-0.044	-0.119261	0.0113262	0.778804	0.0395	0.0296127	27.9622	0.653596	0.844373	2.07773	0	0.0404053
2024	HTI	Công nghiệp	0.0013	0.7498	0	-0.267078	0.267078	0.044	0.1292	0.936716	0.0248135	0.0113262	0.157983	0.120261	0.653596	27.9622	0.043	-0.043	-0.0868831	0.0355391	0.779417	0.044	0.0379003	28.0414	0.665269	0.720099	2.94453	1	0.112396
2020	HTL	Tiêu dùng không thiết yếu	0.6872	0.8576	0	-0.274262	0.274262	0.0625	0.1219	1.26897	-0.0619199	-0.110815	0.14408	0.14408	0.482641	26.6098	0.001	0.001	-0.08488	-0.110815	0.115082	0.0625	0.14408	26.6098	0.482641	0.1213	1.64539	0	-0.051084
2021	HTL	Tiêu dùng không thiết yếu	0.6872	0.8576	0	-0.216646	0.216646	0.0774	0.1394	0.968764	0.00374847	-0.110815	0.0720629	0.14408	0.482641	26.6098	0.057	-0.057	0.0272371	0.345327	0.105623	0.0774	0.0175418	26.5456	0.403863	0.112626	1.97949	0	0.159159
2022	HTL	Tiêu dùng không thiết yếu	0.6872	0.8575	0	0.111687	0.111687	0.1064	0.1706	0.759569	0.0118919	0.345327	-0.0549076	0.0720629	0.403863	26.5456	0.169	0.169	0.125208	0.418663	0.102001	0.1064	-0.0132864	26.6024	0.350049	0.096371	2.35444	0	0.156114
2023	HTL	Tiêu dùng không thiết yếu	0.7572	0.8575	0	-0.0640412	0.0640412	0.0951	0.1561	1.17905	0.00462985	0.418663	0.108236	-0.0549076	0.350049	26.6024	0.221	0.221	0.223864	-1.09003	0.0855231	0.0951	0.0278271	26.8285	0.422682	0.0682153	2.0633	0	-0.372112
2024	HTL	Tiêu dùng không thiết yếu	0.5817	0.8576	0	-0.488228	0.488228	0.0649	0.1056	1.64397	-0.00537475	-1.09003	0.149951	0.108236	0.422682	26.8285	0.149	0.149	0.0603488	-0.403877	0.0600815	0.0649	0.0417081	26.3056	0.322902	0.10135	2.48274	0	-0.275298
2020	HUB	Nguyên vật liệu	0.0832	0.36	0	-0.167245	0.167245	0.0906	0.1674	1.21624	0.0405755	-0.0193582	0.0573904	0.0573904	0.397757	27.3553	0.379	-0.379	0.11611	-0.0193582	0.126593	0.0906	0.0573904	27.3553	0.397757	0.122044	1.92962	1	-0.0301289
2021	HUB	Nguyên vật liệu	0.0663	0.36	0	-0.26026	0.26026	0.0695	0.1244	0.748443	0.0546373	-0.0193582	0.126818	0.0573904	0.397757	27.3553	0.185	0.185	-0.0444182	-0.0139264	0.106185	0.0695	0.0322846	27.3977	0.391061	0.101783	1.86563	1	-0.0231811
2022	HUB	Nguyên vật liệu	0.0571	0.3997	0	-0.230452	0.230452	0.071	0.1241	0.828463	0.0412901	-0.0139264	0.0781193	0.126818	0.391061	27.3977	0.411	-0.411	-0.0625193	-0.0256438	0.0883366	0.071	0.0199432	27.4645	0.363874	0.0826229	2.29484	0	-0.045588
2023	HUB	Nguyên vật liệu	0.0492	0.7319	0	-0.266198	0.266198	0.0705	0.1199	0.883006	0.0496129	-0.0256438	0.111834	0.0781193	0.363874	27.4645	0.244	0.244	-0.0870339	-0.0826923	0.0750171	0.0705	0.0288929	27.563	0.365064	0.0679812	2.55977	0	-0.164678
2024	HUB	Nguyên vật liệu	0.0579	0.3997	0	-0.0293839	0.0293839	0.0716	0.1124	0.858501	0.0337404	-0.0826923	-0.0394953	0.111834	0.365064	27.563	0.044	-0.044	0.0523953	-0.0498536	0.1842	0.0716	-0.0103596	27.5913	0.360472	0.179064	3.06811	0	-0.131155
2020	HVH	Công nghiệp	0.5001	0.5	0	-0.175756	0.175756	0.0527	0.0767	0.819746	0.376215	-0.318038	0.0384448	0.0384448	0.324004	26.8746	0.167	-0.167	0.0240552	-0.318038	0.160424	0.0527	0.0384448	26.8746	0.324004	0.13015	1.59654	0	-0.230075
2021	HVH	Công nghiệp	0.4923	0.4442	0	0.247387	0.247387	0.0177	0.0284	0.622307	0.099568	-0.318038	-0.168214	0.0384448	0.324004	26.8746	0.004	-0.004	0.237114	-0.20646	0.123482	0.0177	-0.0464349	27.2994	0.358732	0.0807435	1.73959	0	-0.239113
2022	HVH	Công nghiệp	0.4953	0.4442	0	-0.182554	0.182554	0.0317	0.0486	0.572859	0.0369841	-0.20646	0.0590114	-0.168214	0.358732	27.2994	0.031	0.031	0.0140886	0.188507	0.0738555	0.0317	0.0178402	27.2457	0.299097	0.0779276	1.89399	0	0.438804
2023	HVH	Công nghiệp	0.4614	0.4536	0	-0.191908	0.191908	0.0163	0.023	0.813955	0.0121398	0.188507	0.109988	0.0590114	0.299097	27.2457	0.018	-0.018	-0.0452876	-0.283478	0.0771789	0.0163	0.0267592	27.2173	0.261909	0.0794081	2.11149	0	-0.434662
2024	HVH	Công nghiệp	0.5113	0.4548	0	-0.177743	0.177743	0.0446	0.0581	0.775363	0.0572659	-0.283478	0.0951669	0.109988	0.261909	27.2173	0.105	-0.105	-0.0158669	0.215953	0.074671	0.0446	0.023453	27.2657	0.205479	0.071142	2.40517	0	0.569269
2020	HVN	Công nghiệp	0	0.9496	0.8619	0.239245	0.239245	-0.1572	-0.8928	1.42322	0.00196578	-0.754559	-0.0844363	-0.0844363	0.902939	31.7672	0.044	0.044	0.188136	-0.754559	0.58245	-0.1572	-0.0844363	31.7672	0.902939	0.711791	0.252236	1	-0.587304
2021	HVN	Công nghiệp	0.0001	0.9196	0.8634	0.290706	0.290706	-0.2055	-3.2938	1.50435	0.00634288	-0.754559	-0.108042	-0.0844363	0.902939	31.7672	0.013	0.013	0.280842	-0.201831	0.691347	-0.2055	-0.0243111	31.7751	0.991659	0.685894	0.275677	1	-0.311483
2022	HVN	Công nghiệp	0.0001	0.9196	0.8634	-0.0936366	0.0936366	-0.1691	2.2703	1.63882	0.00153367	-0.201831	0.109322	-0.108042	0.991659	31.7751	0.005	0.005	-0.0801224	0.673949	0.644978	-0.1691	0.0274388	31.7359	1.18233	0.670755	0.238029	1	1.52264
2023	HVN	Công nghiệp	0.0001	0.9196	0.8634	-0.0693744	0.0693744	-0.1002	0.4079	2.34431	-0.00851083	0.673949	0.0165527	0.109322	1.18233	31.7359	0.022	-0.022	0.0399473	0.348466	0.566635	-0.1002	0.00405709	31.6866	1.29499	0.595294	0.243321	1	0.300093
2024	HVN	Công nghiệp	0.0001	0.9196	0.8634	-0.378583	0.378583	0.1305	-0.5737	2.25092	0.00658485	0.348466	0.163567	0.0165527	1.29499	31.6866	0.013	0.013	-0.0866668	0.24953	0.512692	0.1305	0.0398831	31.6947	1.16059	0.508553	0.303323	1	0.157332
2020	HVX	Nguyên vật liệu	0.3794	0.7575	0.7575	-0.0252739	0.0252739	0.0054	0.0102	0.806313	0.0131685	-0.269707	0.047308	0.047308	0.444266	27.3956	0.37	-0.370	0.056792	-0.269707	0.693335	0.0054	0.047308	27.3956	0.444266	0.756708	0.429906	0	-0.267504
2021	HVX	Nguyên vật liệu	0	0.7575	0.7575	-0.0165185	0.0165185	0.0139	0.0248	0.600501	0.0115354	-0.269707	0.0325711	0.047308	0.444266	27.3956	0.296	-0.296	0.105329	0.045114	0.702261	0.0139	0.00778689	27.3641	0.436187	0.724743	0.505102	0	0.0559704
2022	HVX	Nguyên vật liệu	0.0004	0.7575	0.7575	-0.123933	0.123933	0.0024	0.0042	0.587243	0.0101837	0.045114	0.142539	0.0325711	0.436187	27.3641	0.177	0.177	0.0518612	0.102078	0.678238	0.0024	0.0350733	27.3718	0.425268	0.673027	0.592426	0	0.11621
2023	HVX	Nguyên vật liệu	0.0004	0.7575	0.7575	0.0955139	0.0955139	-0.088	-0.1577	0.615619	0.00309663	0.102078	-0.0227063	0.142539	0.425268	27.3718	0.096	-0.096	0.100806	-0.309488	0.610641	-0.088	-0.00569847	27.2541	0.461262	0.686896	0.490853	0	-0.318096
2024	HVX	Nguyên vật liệu	0.0005	0.7575	0.7575	-0.106834	0.106834	-0.0681	-0.1246	0.624617	0.00848018	-0.309488	0.0578453	-0.0227063	0.461262	27.2541	0.047	0.047	0.0435547	-0.239292	0.618038	-0.0681	0.0136114	27.124	0.445352	0.703964	0.447069	0	-0.320637
2020	ICT	Dịch vụ viễn thông	0.0782	0.3143	0.3143	0.0588233	0.0588233	0.0312	0.0982	0.955508	0.0131908	-0.308325	0.0645463	0.0645463	0.676965	28.4015	0.052	0.052	0.0327537	-0.308325	0.0633118	0.0312	0.0645463	28.4015	0.676965	0.0643676	1.34499	0	-0.299664
2021	ICT	Dịch vụ viễn thông	0.0667	0.3143	0.3143	-0.237787	0.237787	0.0271	0.0819	0.87398	0.00704567	-0.308325	0.159418	0.0645463	0.676965	28.4015	0.021	-0.021	-0.0766175	0.236545	0.0665723	0.0271	0.0395248	28.3745	0.662032	0.068395	1.36744	0	0.322887
2022	ICT	Dịch vụ viễn thông	0.097	0.3143	0.3143	-0.0802426	0.0802426	0.0057	0.0148	0.795717	0.0016675	0.236545	-0.00911516	0.159418	0.662032	28.3745	0.1	-0.100	0.0721152	-0.380744	0.0604462	0.0057	-0.00224801	28.0052	0.544434	0.0874488	1.54748	0	-0.382398
2023	ICT	Dịch vụ viễn thông	0.097	0.3143	0.3143	-0.133693	0.133693	0.0103	0.0229	0.83741	0.0141175	-0.380744	0.00788908	-0.00911516	0.544434	28.0052	0.03	0.030	0.00531092	0.13935	0.0951556	0.0103	0.00161217	27.9965	0.553799	0.0959816	1.51972	0	0.156638
2024	ICT	Dịch vụ viễn thông	0.1761	0.3143	0.3143	-0.308512	0.308512	0.0213	0.0479	0.85299	0.0105444	0.13935	0.257044	0.00788908	0.553799	27.9965	0.12	-0.120	-0.262944	0.0531743	0.0889042	0.0213	0.0639834	28.0199	0.55522	0.0868464	1.52964	0	0.0512318
2020	IDI	Tiêu dùng thiết yếu	0.0568	0.5674	0	0.0325259	0.0325259	0.0126	0.0342	0.978673	0.1039	-0.182173	-0.00419822	-0.00419822	0.611249	29.674	0.06	-0.060	0.0199982	-0.182173	0.156825	0.0126	-0.00419822	29.674	0.611249	0.152351	1.27206	0	-0.176558
2021	IDI	Tiêu dùng thiết yếu	0.0457	0.5123	0	-0.0760262	0.0760262	0.0179	0.0468	0.965196	0.00154426	-0.182173	0.0330119	-0.00419822	0.611249	29.674	0.034	-0.034	-0.0102119	-0.0839952	0.140899	0.0179	0.00837241	29.6531	0.583973	0.143879	1.34	0	-0.101764
2022	IDI	Tiêu dùng thiết yếu	0.0534	0.565	0	-0.158215	0.158215	0.07	0.1771	0.897554	0.0479887	-0.0839952	0.0702248	0.0330119	0.583973	29.6531	0.127	-0.127	-0.0370248	0.292788	0.13241	0.07	0.0173725	29.7209	0.583576	0.123725	1.20451	0	0.386735
2023	IDI	Tiêu dùng thiết yếu	0.0528	0.565	0	-0.0143204	0.0143204	0.0071	0.0179	0.815181	0.0260363	0.292788	0.0213855	0.0702248	0.583576	29.7209	0.025	-0.025	0.000414514	-0.0877382	0.112443	0.0071	0.00552766	29.7446	0.586641	0.109817	1.22232	0	-0.0894373
2024	IDI	Tiêu dùng thiết yếu	0.0528	0.565	0	-0.0481935	0.0481935	0.0068	0.0175	0.867338	0.0411047	-0.0877382	-0.00985678	0.0213855	0.586641	29.7446	0.05	-0.050	0.0271568	-0.0102044	0.098304	0.0068	-0.00249331	29.8693	0.62759	0.0867733	1.52574	0	-0.0116969
2020	IJC	Bất động sản	0	0.4976	0.4976	-0.302182	0.302182	0.0521	0.1896	1.24666	0.00578085	0.0717446	0.074249	0.074249	0.688299	29.5244	0.024	-0.024	-0.067449	0.0717446	0.0728002	0.0521	0.074249	29.5244	0.688299	0.0827261	1.48106	0	0.338464
2021	IJC	Bất động sản	0	0.4976	0.4976	0.0667699	0.0667699	0.0924	0.2294	0.939344	0.00676526	0.0717446	-0.145111	0.074249	0.688299	29.5244	0.074	-0.074	0.314011	0.0693231	0.0793602	0.0924	-0.0339624	29.5492	0.50889	0.0774149	2.47847	0	0.215023
2022	IJC	Bất động sản	0	0.4976	0.4976	-0.208089	0.208089	0.0767	0.1428	0.897549	0.0164205	0.0693231	0.0453588	-0.145111	0.50889	29.5492	0.054	-0.054	0.0148412	-0.0930582	0.0856406	0.0767	0.0114804	29.5064	0.414993	0.0893853	2.19197	0	-0.243531
2023	IJC	Bất động sản	0	0.4976	0.4976	-0.25282	0.25282	0.0611	0.1034	0.937745	0.0328632	-0.0930582	0.0446718	0.0453588	0.414993	29.5064	0.034	-0.034	0.0212282	-0.0726274	0.089213	0.0611	0.010929	29.4879	0.402915	0.09088	1.6148	0	-0.240726
2024	IJC	Bất động sản	0	0.4976	0.4976	0.203103	0.203103	0.0497	0.0789	1.01025	0.0126377	-0.0726274	-0.124444	0.0446718	0.402915	29.4879	0.032	-0.032	0.125944	-0.0740324	0.0855157	0.0497	-0.030823	29.6906	0.343153	0.0698259	2.15281	0	-0.317253
2020	IMP	Chăm sóc sức khỏe	0.033	0.6118	0.2203	-0.371692	0.371692	0.1063	0.1275	2.62456	0.0459056	-0.0178829	0.0396029	0.0396029	0.174566	28.3713	0.108	0.108	-0.0366029	-0.0178829	0.27245	0.1063	0.0396029	28.3713	0.174566	0.240054	2.83045	1	-0.0235535
2021	IMP	Chăm sóc sức khỏe	0.0205	0.6661	0.2203	-0.366277	0.366277	0.0861	0.1073	1.88951	0.0200799	-0.0178829	0.112037	0.0396029	0.174566	28.3713	0.005	-0.005	-0.0969372	-0.0490471	0.243172	0.0861	0.0297798	28.4616	0.21802	0.222164	2.87868	1	-0.0750864
2022	IMP	Chăm sóc sức khỏe	0.0147	0.8681	0.2203	-0.612218	0.612218	0.0978	0.1212	2.03707	0.0519012	-0.0490471	0.16499	0.112037	0.21802	28.4616	0.075	-0.075	-0.16069	0.164339	0.212963	0.0978	0.0431098	28.4539	0.167987	0.214623	2.88513	1	0.297735
2023	IMP	Chăm sóc sức khỏe	0.014	0.8683	0.2203	-0.339428	0.339428	0.1283	0.1506	1.52066	0.0267887	0.164339	-0.0173631	0.16499	0.167987	28.4539	0.091	0.091	0.0204631	0.15386	0.410881	0.1283	-0.00432392	28.5034	0.128745	0.391017	3.91881	1	0.213134
2024	IMP	Chăm sóc sức khỏe	0.0099	0.7948	0.2204	-0.547031	0.547031	0.131	0.1504	3.01826	0.0471967	0.15386	0.0903896	-0.0173631	0.128745	28.5034	0.151	0.151	-0.0822896	0.0882227	0.358942	0.131	0.0231572	28.5492	0.128418	0.342869	4.38213	1	0.105857
2020	ITC	Bất động sản	0.0096	0.6074	0.1617	-0.122172	0.122172	0.0331	0.082	0.888409	0.0171316	0.114013	0.0216977	0.0216977	0.559543	29.1154	0.086	0.086	-0.0150977	0.114013	0.27333	0.0331	0.0216977	29.1154	0.559543	0.255623	1.19231	1	1.04296
2021	ITC	Bất động sản	0.0096	0.4085	0.1617	-0.118373	0.118373	0.0316	0.0733	0.660802	0.0152768	0.114013	0.0396548	0.0216977	0.559543	29.1154	0.119	0.119	-0.0367548	-0.0461208	0.2575	0.0316	0.0102456	29.0673	0.507383	0.270184	1.27118	1	-0.220821
2022	ITC	Bất động sản	0.014	0.4599	0.1618	-0.127053	0.127053	0.0362	0.0761	0.71241	0.0268228	-0.0461208	0.0383262	0.0396548	0.507383	29.0673	0.024	0.024	-0.0344262	0.0232752	0.295733	0.0362	0.00935123	29.0602	0.467731	0.297849	1.36908	1	0.136307
2023	ITC	Bất động sản	0.014	0.4717	0.1618	-0.0917257	0.0917257	0.0187	0.0371	0.693084	0.00209128	0.0232752	0.040042	0.0383262	0.467731	29.0602	0.125	0.125	-0.044742	-0.0687149	0.286424	0.0187	0.0099748	29.0542	0.444609	0.288149	1.51233	1	-0.351627
2024	ITC	Bất động sản	0.014	0.4597	0.1618	-0.00626663	0.00626663	0.0081	0.0142	0.679825	0.00572724	-0.0687149	-0.0347624	0.040042	0.444609	29.0542	0.077	0.077	-0.0387376	0.0105362	0.266979	0.0081	-0.0086645	29.0144	0.417644	0.277806	1.65743	0	0.0826572
2020	KBC	Bất động sản	0.1822	0.3684	0	0.377733	0.377733	0.0111	0.0234	1.56212	-0.00643174	-0.0644401	-0.177278	-0.177278	0.552129	30.8001	0.043	0.043	0.178278	-0.0644401	0.0155953	0.0111	-0.177278	30.8001	0.552129	0.0107743	3.07421	1	-0.329899
2021	KBC	Bất động sản	0.1502	0.2955	0	-0.0701346	0.0701346	0.04	0.0916	0.929796	0.0198039	-0.0644401	-0.0518069	-0.177278	0.552129	30.8001	0.045	0.045	0.0528069	0.0880783	0.0104496	0.04	-0.0153196	31.0651	0.465541	0.00801736	3.94467	1	0.973992
2022	KBC	Bất động sản	0.1986	0.3711	0	0.0543849	0.0543849	0.0463	0.1008	1.16936	0.0224498	0.0880783	-0.0392738	-0.0518069	0.465541	31.0651	0.159	0.159	0.0398738	-0.106307	0.011786	0.0463	-0.0111116	31.1837	0.488762	0.0104676	2.5902	1	-0.776196
2023	KBC	Bất động sản	0.1986	0.4364	0	-0.216154	0.216154	0.0594	0.1186	1.04608	0.004188	-0.106307	0.0860113	-0.0392738	0.488762	31.1837	0.104	0.104	0.152289	0.133735	0.0128576	0.0594	0.0227767	31.1406	0.395204	0.0134238	3.80457	1	4.91253
2024	KBC	Bất động sản	0.0858	0.3168	0	-0.0240554	0.0240554	0.0098	0.0187	1.00523	0.00580126	0.133735	0.0344507	0.0860113	0.395204	31.1406	0.05	-0.050	0.172549	-0.0850237	0.0122129	0.0098	0.00842713	31.4317	0.538454	0.00912873	5.0863	1	-0.505956
2020	KDC	Tiêu dùng thiết yếu	0.1504	0.3708	0	-0.195706	0.195706	0.0168	0.0351	1.57938	-0.017781	0.0933334	0.00813114	0.00813114	0.376525	30.1446	0.009	0.009	0.166269	0.0933334	0.224316	0.0168	0.00813114	30.1446	0.376525	0.216741	1.43942	1	0.154463
2021	KDC	Tiêu dùng thiết yếu	0.1401	0.4133	0	-0.113057	0.113057	0.0447	0.0953	1.74252	0.138898	0.0933334	-0.00168068	0.00813114	0.376525	30.1446	0	-0.000	-0.0866193	0.175984	0.205749	0.0447	-0.000427387	30.2753	0.51007	0.18055	1.29948	1	0.261094
2022	KDC	Tiêu dùng thiết yếu	0.1506	0.3634	0	-0.21553	0.21553	0.0258	0.0536	1.72685	0.00630184	0.175984	-0.0270453	-0.00168068	0.51007	30.2753	0.001	0.001	-0.123455	0.144842	0.186741	0.0258	-0.00720238	30.2704	0.496406	0.187647	1.28619	1	0.194184
2023	KDC	Tiêu dùng thiết yếu	0.1449	0.237	0	-0.278258	0.278258	0.0108	0.021	1.8058	-0.156861	0.144842	0.059857	-0.0270453	0.496406	30.2704	0.024	-0.024	0.047943	-0.277446	0.184378	0.0108	0.0149281	30.148	0.425881	0.208391	1.65259	1	-0.309973
2024	KDC	Tiêu dùng thiết yếu	0.167	0.4121	0	-0.209366	0.209366	0.0029	0.0052	1.71661	0.0150363	-0.277446	0.042539	0.059857	0.425881	30.148	0.053	-0.053	0.043861	-0.0262934	0.209241	0.0029	0.00998456	30.2322	0.461023	0.192344	1.37479	1	-0.0376666
2020	KDH	Bất động sản	0.0313	0.51	0	-0.175795	0.175795	0.0849	0.1464	2.50156	0.00434593	0.129839	0.0122843	0.0122843	0.418449	30.2721	0.026	-0.026	0.164616	0.129839	0.00358316	0.0849	0.0122843	30.2721	0.418449	0.00338116	3.02631	1	0.610913
2021	KDH	Bất động sản	0.0407	0.3582	0	0.0476572	0.0476572	0.0847	0.1313	1.46086	0.00409429	0.129839	-0.143265	0.0122843	0.418449	30.2721	0.094	-0.094	0.323165	-0.0565791	0.00287566	0.0847	-0.0368551	30.2964	0.288846	0.00280673	5.95488	1	-0.17513
2022	KDH	Bất động sản	0.0601	0.3391	0	0.297957	0.297957	0.0614	0.1015	1.48909	0.0584476	-0.0565791	-0.0728282	-0.143265	0.288846	30.2964	0.079	-0.079	0.130428	-0.0574982	0.00563954	0.0614	-0.0184279	30.7009	0.452417	0.00376315	5.85453	1	-0.22106
2023	KDH	Bất động sản	0.0539	0.4488	0	0.288483	0.288483	0.0298	0.0572	1.45819	-0.126295	-0.0574982	-0.0716464	-0.0728282	0.452417	30.7009	0.005	0.005	0.191246	-0.0382647	0.00377576	0.0298	-0.021486	30.9074	0.413804	0.00307118	4.62759	1	-0.283037
2024	KDH	Bất động sản	0.0483	0.2669	0	0.191436	0.191436	0.0283	0.0463	1.55429	-0.0123956	-0.0382647	-0.137744	-0.0716464	0.413804	30.9074	0.054	-0.054	0.188744	0.0449691	0.00276963	0.0283	-0.0379795	31.0572	0.367527	0.0023845	6.89666	1	0.570376
2020	KHP	Dịch vụ tiện ích	0.0049	0.5918	0.5918	-0.132689	0.132689	0.0225	0.0692	1.14865	0.0674843	-0.400244	0.123371	0.123371	0.673299	28.3384	0.103	-0.103	-0.120371	-0.400244	0.5972	0.0225	0.123371	28.3384	0.673299	0.585629	1.17233	0	-0.148295
2021	KHP	Dịch vụ tiện ích	0.0018	0.521	0.521	-0.0588937	0.0588937	0.023	0.0715	0.897181	0.101156	-0.400244	0.0760258	0.123371	0.673299	28.3384	0.429	-0.429	-0.0633258	-0.104252	0.605735	0.023	0.0191924	28.3944	0.682793	0.57273	1.21535	0	-0.0462484
2022	KHP	Dịch vụ tiện ích	0.0009	0.521	0.521	-0.148554	0.148554	0.0273	0.0849	0.929961	0.126977	-0.104252	0.141874	0.0760258	0.682793	28.3944	0.101	0.101	-0.109674	0.373912	0.58807	0.0273	0.036462	28.4061	0.673393	0.581241	1.38589	0	0.183941
2023	KHP	Dịch vụ tiện ích	0.0009	0.521	0.521	-0.0113817	0.0113817	0.0245	0.0778	1.04108	0.079726	0.373912	0.0362682	0.141874	0.673393	28.4061	0.077	0.077	-0.000668169	0.479876	0.56201	0.0245	0.00911999	28.4637	0.695627	0.530561	1.2536	0	0.201735
2024	KHP	Dịch vụ tiện ích	0.0009	0.5344	0.5344	-0.042959	0.042959	0.0253	0.0823	1.04543	0.0868842	0.479876	0.113232	0.0362682	0.695627	28.4637	0.056	-0.056	-0.0616324	0.397185	0.480041	0.0253	0.0291229	28.4466	0.688849	0.488322	1.18066	0	0.147178
2020	KMR	Tiêu dùng không thiết yếu	0.2502	0.5559	0	0.0345606	0.0345606	0.0002	0.0003	0.86275	0.0245219	-0.128521	0.0508126	0.0508126	0.457223	27.7311	0.018	0.018	-0.0260126	-0.128521	0.306992	0.0002	0.0508126	27.7311	0.457223	0.276411	1.55939	0	-0.234756
2021	KMR	Tiêu dùng không thiết yếu	0.2483	0.5559	0	-0.0563894	0.0563894	0.0166	0.0297	0.575434	0.00672325	-0.128521	0.00724095	0.0508126	0.457223	27.7311	0.064	-0.064	0.0202591	0.0701943	0.240032	0.0166	0.00190513	27.7033	0.425159	0.2468	1.75233	0	0.186088
2022	KMR	Tiêu dùng không thiết yếu	0.2483	0.4654	0	-0.213345	0.213345	0.0168	0.0269	0.532459	0.0105044	0.0701943	0.048672	0.00724095	0.425159	27.7033	0.107	-0.107	-0.013672	0.0971634	0.212912	0.0168	0.0119989	27.555	0.317025	0.246967	2.33974	0	0.211216
2023	KMR	Tiêu dùng không thiết yếu	0.2483	0.556	0	-0.0608473	0.0608473	0.0109	0.0154	0.480618	0.00734281	0.0971634	-0.0135226	0.048672	0.317025	27.555	0.14	-0.140	0.0395226	-0.113605	0.21214	0.0109	-0.00313032	27.5025	0.271049	0.223561	2.83019	0	-0.175776
2024	KMR	Tiêu dùng không thiết yếu	0.2483	0.5662	0	-0.0496438	0.0496438	0.0079	0.0106	0.463118	0.026308	-0.113605	0.0224016	-0.0135226	0.271049	27.5025	0.268	-0.268	0.0215984	-0.093307	0.211263	0.0079	0.00545359	27.4809	0.248316	0.215885	3.10223	0	-0.166211
2020	KOS	Dịch vụ tiện ích	0.5371	0.8888	0	0.308551	0.308551	0.0107	0.0191	1.97366	0.0415544	0.128778	-0.182014	-0.182014	0.472962	28.4188	0.169	0.169	0.250914	0.128778	0.0121803	0.0107	-0.182014	28.4188	0.472962	0.0105749	2.55859	0	0.231268
2021	KOS	Dịch vụ tiện ích	0.5911	0.7696	0	0.275836	0.275836	0.0074	0.0132	2.42152	0.0377151	0.128778	-0.130494	-0.182014	0.472962	28.4188	0.053	-0.053	0.228094	-0.0919083	0.286518	0.0074	-0.0349252	28.9855	0.415833	0.162563	2.92945	0	-0.154405
2022	KOS	Dịch vụ tiện ích	0.5923	0.6732	0	0.376037	0.376037	0.005	0.0096	2.28682	0.0468207	-0.0919083	-0.14223	-0.130494	0.415833	28.9855	0.075	-0.075	0.22183	0.0611364	0.286784	0.005	-0.045372	29.207	0.527413	0.229804	2.58677	0	0.214078
2023	KOS	Dịch vụ tiện ích	0.4999	0.631	0	0.0209819	0.0209819	0.0044	0.0092	2.27285	0.00240793	0.0611364	0.00708853	-0.14223	0.527413	29.207	0.096	-0.096	0.0917115	-0.005717	0.226434	0.0044	0.0019676	29.1898	0.514754	0.230369	2.60865	0	-0.0205774
2024	KOS	Dịch vụ tiện ích	0.4536	0.5207	0	-0.00770487	0.00770487	0.0045	0.0093	2.23783	0.0159305	-0.005717	0.00718137	0.00708853	0.514754	29.1898	0.007	-0.007	0.115119	0.0259019	0.223576	0.0045	0.00177988	29.2103	0.52206	0.219045	2.45875	0	0.0935627
2020	KSB	Nguyên vật liệu	0.0582	0.269	0	-0.290087	0.290087	0.0831	0.2281	1.29856	0.0260275	0.00213818	0.115519	0.115519	0.596426	28.9983	0.049	-0.049	-0.0637188	0.00213818	0.0353399	0.0831	0.115519	28.9983	0.596426	0.0356503	1.69933	1	0.0064428
2021	KSB	Nguyên vật liệu	0.0558	0.269	0	-0.113267	0.113267	0.0639	0.15	0.976326	0.0565564	0.00213818	0.0112703	0.115519	0.596426	28.9983	0.136	-0.136	0.0502297	-0.111643	0.0298445	0.0639	0.00280524	29.0135	0.551337	0.0293951	1.70588	1	-0.33134
2022	KSB	Nguyên vật liệu	0.0733	0.2988	0	-0.114727	0.114727	0.037	0.0816	1.06633	0.127232	-0.111643	0.0325857	0.0112703	0.551337	29.0135	0.079	-0.079	-0.0162857	-0.00631564	0.0242833	0.037	0.00820822	29.0762	0.542549	0.0228072	1.53428	1	-0.0284606
2023	KSB	Nguyên vật liệu	0.0611	0.3565	0	-0.0562151	0.0562151	0.0173	0.0375	0.857198	0.0513589	-0.00631564	0.00683263	0.0325857	0.542549	29.0762	0.011	-0.011	0.0671674	-0.077893	0.0185301	0.0173	0.0017617	29.0842	0.532872	0.0183833	1.56551	1	-0.384681
2024	KSB	Nguyên vật liệu	0.0606	0.2109	0	-0.120946	0.120946	0.0115	0.0228	0.892871	0.138129	-0.077893	0.0752679	0.00683263	0.532872	29.0842	0.227	0.227	-0.0287679	-0.0297778	0.0126112	0.0115	0.0188918	29.2258	0.462021	0.0109458	1.88522	1	-0.240907
2020	LAF	Tiêu dùng thiết yếu	0	0.8052	0	-0.575374	0.575374	0.1053	0.1656	2.08104	0.0697218	-0.250216	0.331353	0.331353	0.236006	26.0586	0.063	-0.063	-0.270953	-0.250216	0.24123	0.1053	0.331353	26.0586	0.236006	0.294161	2.75879	1	-0.135138
2021	LAF	Tiêu dùng thiết yếu	0.5368	0.8052	0	-0.113595	0.113595	0.1627	0.2233	1.00584	0.0892615	-0.250216	0.010292	0.331353	0.236006	26.0586	0.156	-0.156	0.035708	0.0486882	0.352093	0.1627	0.00231863	26.3572	0.297737	0.261215	2.35214	1	0.0249336
2022	LAF	Tiêu dùng thiết yếu	0	0.8052	0	0.539303	0.539303	0.0753	0.1342	1.02187	0.0564452	0.0486882	-0.367344	0.010292	0.297737	26.3572	0.013	-0.013	0.429744	0.337565	0.290671	0.0753	-0.105444	26.7238	0.53659	0.201454	1.42774	1	0.227344
2023	LAF	Tiêu dùng thiết yếu	0	0.8052	0	-0.492684	0.492684	0.0778	0.14	1.1128	0.043786	0.337565	0.250352	-0.367344	0.53659	26.7238	0.113	0.113	-0.190452	-0.194033	0.186001	0.0778	0.0739347	26.5288	0.332356	0.226047	2.13462	1	-0.153625
2024	LAF	Tiêu dùng thiết yếu	0.0526	0.7788	0	-0.766154	0.766154	0.1288	0.1917	1.09426	0.0481857	-0.194033	0.320557	0.250352	0.332356	26.5288	0.046	-0.046	-0.290357	0.10377	0.250378	0.1288	0.0723505	26.626	0.324585	0.227199	2.25628	1	0.0798748
2020	LBM	Nguyên vật liệu	0.0721	0.699	0	-0.604812	0.604812	0.1572	0.1915	2.13494	0.156585	0.0385923	0.270473	0.270473	0.16103	26.8345	0.039	-0.039	-0.242973	0.0385923	0.574093	0.1572	0.270473	26.8345	0.16103	0.508673	2.7381	0	0.0261789
2021	LBM	Nguyên vật liệu	0.0218	0.649	0	-0.760165	0.760165	0.1643	0.204	0.936442	0.338882	0.0385923	0.365847	0.270473	0.16103	26.8345	0.135	-0.135	-0.343447	0.40692	0.665815	0.1643	0.0969876	27.0224	0.201252	0.551766	2.00595	0	0.303585
2022	LBM	Nguyên vật liệu	0.0253	0.7292	0	-0.726228	0.726228	0.1928	0.2528	1.59817	0.235428	0.40692	0.306087	0.365847	0.201252	27.0224	0.028	-0.028	-0.431287	0.598156	0.666663	0.1928	0.0836893	27.2928	0.251756	0.508714	1.76439	0	0.413091
2023	LBM	Nguyên vật liệu	0.0229	0.7704	0	-0.579824	0.579824	0.1687	0.2224	0.922627	0.249743	0.598156	0.211917	0.306087	0.251756	27.2928	0.02	-0.020	-0.197517	-0.296693	0.431607	0.1687	0.0600987	27.3695	0.219917	0.399725	3.11703	0	-0.190021
2024	LBM	Nguyên vật liệu	0.0161	0.7693	0	-0.62593	0.62593	0.1041	0.1359	1.63762	0.149776	-0.296693	0.378591	0.211917	0.219917	27.3695	0.082	-0.082	-0.370291	-0.0372561	0.435244	0.1041	0.0982774	27.4252	0.246877	0.411675	1.57985	0	-0.0318086
2020	LGC	Công nghiệp	0	0.9972	0	-0.0645776	0.0645776	0.0288	0.1096	1.39447	0.0241477	-0.000722217	0.0161056	0.0161056	0.626657	30.108	0.044	0.044	-0.0161056	-0.000722217	0.283613	0.0288	0.0161056	30.108	0.626657	0.268237	0.82054	0	-0.0114068
2021	LGC	Công nghiệp	0	0.9973	0	-0.0817055	0.0817055	0.0173	0.0652	1.51769	0.0142217	-0.000722217	0.0290193	0.0161056	0.626657	30.108	0.022	0.022	-0.0290193	0.0164152	0.61148	0.0173	0.00745697	30.1307	0.615029	0.597798	0.84991	0	0.27729
2022	LGC	Công nghiệp	0	0.9976	0	-0.107606	0.107606	0.0234	0.0855	1.53674	0.00645558	0.0164152	0.0335185	0.0290193	0.615029	30.1307	0.012	-0.012	-0.0335185	0.0361684	0.559536	0.0234	0.00847443	30.1766	0.620122	0.534437	0.559882	0	0.489277
2023	LGC	Công nghiệp	0	0.9978	0	-0.104747	0.104747	0.0388	0.1972	1.34946	0.0375333	0.0361684	0.0112749	0.0335185	0.620122	30.1766	0.013	0.013	-0.0112749	0.0201036	1.28521	0.0388	0.0028834	30.7628	0.773766	0.715144	0.557181	0	0.191185
2024	LGC	Công nghiệp	0	0.9977	0	-0.105532	0.105532	0.0229	0.0979	1.31992	0.0152301	0.0201036	0.0256604	0.0112749	0.773766	30.7628	0.124	-0.124	-0.0256604	0.039563	0.692334	0.0229	0.00824329	30.7865	0.757716	0.676111	1.10282	0	0.56764
2020	LHG	Bất động sản	0.0128	0.6869	0.4867	-0.17287	0.17287	0.0822	0.1606	1.40463	0.0270137	0.0200037	0.0988694	0.0988694	0.50621	28.5864	0.008	0.008	-0.0988694	0.0200037	0.0336297	0.0822	0.0988694	28.5864	0.50621	0.0289148	2.27808	1	0.0746598
2021	LHG	Bất động sản	0.2128	0.6117	0.4867	-0.363931	0.363931	0.1088	0.2158	0.895857	0.00416766	0.0200037	0.181369	0.0988694	0.50621	28.5864	0.003	-0.003	-0.181369	0.0531118	0.0267922	0.1088	0.0487603	28.6767	0.485441	0.0244784	2.46769	1	0.214536
2022	LHG	Bất động sản	0.0124	0.4867	0.4867	-0.179794	0.179794	0.0697	0.136	0.9869	0.0124452	0.0531118	0.0968068	0.181369	0.485441	28.6767	0.442	0.442	-0.0968068	-0.0536988	0.0210948	0.0697	0.0252939	28.7309	0.489063	0.0199826	2.38198	0	-0.195474
2023	LHG	Bất động sản	0.0124	0.5528	0.4867	-0.0706609	0.0706609	0.0549	0.1062	1.07309	0.038045	-0.0536988	0.014317	0.0968068	0.489063	28.7309	0.018	-0.018	-0.014317	-0.077903	0.0184623	0.0549	0.00367614	28.7478	0.478047	0.0181516	2.49674	0	-0.372101
2024	LHG	Bất động sản	0	0.4867	0	-0.0075224	0.0075224	0.0612	0.1151	1.03663	0.0243195	-0.077903	-0.0115002	0.014317	0.478047	28.7478	0.067	0.067	0.0115002	0.00936467	0.018966	0.0612	-0.00289944	28.7528	0.458353	0.018873	2.73187	0	0.0724568
2020	LIX	Tiêu dùng thiết yếu	0.0026	0.51	0.51	-1.07836	1.07836	0.2404	0.3859	1.98773	0.113241	0.41899	0.142535	0.142535	0.373574	27.6485	0.03	0.030	-0.142535	0.41899	0.446844	0.2404	0.142535	27.6485	0.373574	0.393728	1.4968	0	0.148708
2021	LIX	Tiêu dùng thiết yếu	0.0007	0.51	0.51	-0.73593	0.73593	0.1532	0.2414	1.47948	0.0530818	0.41899	0.209306	0.142535	0.373574	27.6485	0.08	-0.080	-0.209306	-0.284169	0.403184	0.1532	0.055633	27.786	0.358451	0.351398	1.70218	0	-0.0996453
2022	LIX	Tiêu dùng thiết yếu	0	0.51	0.51	-0.843445	0.843445	0.1777	0.267	1.66584	0.0355581	-0.284169	0.140769	0.209306	0.358451	27.786	0.038	0.038	-0.140769	0.173117	0.349631	0.1777	0.0376074	27.8398	0.31169	0.331311	2.01996	0	0.0773588
2023	LIX	Tiêu dùng thiết yếu	0	0.51	0.51	-0.802283	0.802283	0.1497	0.2196	1.10835	0.0538817	0.173117	0.200377	0.140769	0.31169	27.8398	0.021	-0.021	-0.200377	-0.0118349	0.339788	0.1497	0.0514419	27.898	0.324418	0.32058	1.98354	0	-0.00518021
2024	LIX	Tiêu dùng thiết yếu	0	0.5609	0.51	-0.750975	0.750975	0.1491	0.2215	1.88354	0.0448789	-0.0118349	0.199288	0.200377	0.324418	27.898	0.087	-0.087	-0.199288	0.0584857	0.318141	0.1491	0.051271	27.965	0.329048	0.297539	2.03626	0	0.0272747
2020	MCM	Tiêu dùng thiết yếu	0.0096	0.51	0	-1.53981	1.53981	0.2447	0.3426	3.18866	0.0166201	0.246712	0.278623	0.278623	0.25412	27.832	0.191	-0.191	-0.278623	0.246712	0.141134	0.2447	0.278623	27.832	0.25412	0.123774	4.13349	1	0.103395
2021	MCM	Tiêu dùng thiết yếu	0.007	0.6815	0	-1.2219	1.2219	0.172	0.2069	1.84772	0.119831	0.246712	0.188337	0.278623	0.25412	27.832	0.049	0.049	-0.188337	0.0840146	0.115955	0.172	0.0501697	28.5421	0.12609	0.0570036	7.65259	1	0.0363861
2022	MCM	Tiêu dùng thiết yếu	0.0044	0.6815	0	-0.694249	0.694249	0.1402	0.1581	1.75458	0.0518393	0.0840146	0.10796	0.188337	0.12609	28.5421	0.16	-0.160	-0.10796	0.0834092	0.0912053	0.1402	0.0361893	28.5292	0.0997729	0.0923836	8.92121	1	0.0709022
2023	MCM	Tiêu dùng thiết yếu	0.0044	0.6815	0	-0.710285	0.710285	0.148	0.165	1.57165	0.0987897	0.0834092	0.117014	0.10796	0.0997729	28.5292	0.05	0.050	-0.117014	0.000946417	0.159894	0.148	0.0290656	28.5889	0.106984	0.15064	7.57013	1	0.000741658
2024	MCM	Tiêu dùng thiết yếu	0.0042	0.6815	0.593	-0.553825	0.553825	0.0831	0.0949	1.54633	0.0372808	0.000946417	0.075232	0.117014	0.106984	28.5889	0.018	0.018	-0.075232	-0.0838295	0.140666	0.0831	0.0193684	28.6193	0.141993	0.136445	5.60079	1	-0.0696764
2020	MCP	Nguyên vật liệu	0	0.5247	0	-0.0413334	0.0413334	0.0573	0.0942	1.35032	0.00323251	1.39105	-0.0147336	-0.0147336	0.425386	26.6452	0.063	-0.063	0.0147336	1.39105	0.164777	0.0573	-0.0147336	26.6452	0.425386	0.132437	2.01348	0	1.538
2021	MCP	Nguyên vật liệu	0.2944	0.2519	0	-0.0570748	0.0570748	0.0639	0.1033	1.0047	0.127709	1.39105	-0.00176187	-0.0147336	0.425386	26.6452	0.058	-0.058	0.00176187	-0.689131	0.095607	0.0639	-0.000488395	26.5338	0.331949	0.106877	2.20713	0	-0.373517
2022	MCP	Nguyên vật liệu	0.2944	0.7918	0	-0.129518	0.129518	0.035	0.0496	2.19562	0.0304391	-0.689131	0.0524691	-0.00176187	0.331949	26.5338	0.184	-0.184	-0.0524691	0.249559	0.103738	0.035	0.0123872	26.4644	0.25491	0.111195	2.79855	0	0.193142
2023	MCP	Nguyên vật liệu	0.1825	0.7519	0	-0.263803	0.263803	0.0553	0.0726	1.63397	0.00640858	0.249559	0.110852	0.0524691	0.25491	26.4644	0.118	-0.118	-0.110852	-0.0698945	0.0794204	0.0553	0.0267515	26.4887	0.221701	0.0775105	3.36181	0	-0.0422969
2024	MCP	Nguyên vật liệu	0.1826	0.5544	0	-0.555271	0.555271	0.0946	0.1147	1.90854	0.0342599	-0.0698945	0.292856	0.110852	0.221701	26.4887	0.23	0.230	-0.292856	-0.0821967	0.053426	0.0946	0.074105	26.4844	0.128998	0.0536596	7.17919	0	-0.0532182
2020	MDG	Nguyên vật liệu	0.108	0.751	0	-0.10765	0.10765	0.024	0.0587	1.00432	0.0154652	-0.42773	0.0751257	0.0751257	0.570177	26.5773	0.209	-0.209	-0.0751257	-0.42773	0.0635625	0.024	0.0751257	26.5773	0.570177	0.0691797	1.27886	0	-0.374772
2021	MDG	Nguyên vật liệu	0.0145	0.4681	0	-0.103594	0.103594	0.0438	0.1019	0.945144	0.0158571	-0.42773	0.0108118	0.0751257	0.570177	26.5773	0.086	0.086	-0.0108118	-0.171862	0.0660829	0.0438	0.00258857	26.6322	0.569689	0.0625492	1.33357	0	-0.221289
2022	MDG	Nguyên vật liệu	0.0941	0.7669	0	-0.229865	0.229865	0.0567	0.1315	0.968197	0.0277853	-0.171862	0.00978749	0.0108118	0.569689	26.6322	0.081	0.081	-0.00978749	0.407189	0.0621428	0.0567	0.00251409	26.701	0.568007	0.0580144	1.37349	0	0.711325
2023	MDG	Nguyên vật liệu	0.0941	0.7714	0	-0.193126	0.193126	-0.0974	-0.246	0.997091	0.00616284	0.407189	-0.0518174	0.00978749	0.568007	26.701	0.116	-0.116	0.0518174	-0.212455	0.0595428	-0.0974	-0.0133994	26.5953	0.644324	0.066179	1.1844	0	-0.232306
2024	MDG	Nguyên vật liệu	0.0941	0.7683	0	-0.315961	0.315961	0.0117	0.031	0.993233	0.0215588	-0.212455	0.111954	-0.0518174	0.644324	26.5953	0.008	-0.008	-0.111954	-0.136154	0.0537348	0.0117	0.0265111	26.5101	0.600479	0.0585158	1.14862	0	-0.17448
2020	MSH	Tiêu dùng không thiết yếu	0.3751	0.5862	0	-0.408689	0.408689	0.0893	0.1832	1.91086	0.0396201	-0.232968	0.0672359	0.0672359	0.451167	28.5972	0.114	0.114	-0.0672359	-0.232968	0.21611	0.0893	0.0672359	28.5972	0.451167	0.211049	1.68802	0	-0.135527
2021	MSH	Tiêu dùng không thiết yếu	0.2634	0.5562	0	-0.336098	0.336098	0.1518	0.317	1.04212	0.0984635	-0.232968	0.0760775	0.0672359	0.451167	28.5972	0.051	0.051	-0.0760775	0.355518	0.190222	0.1518	0.0192447	28.795	0.533072	0.156077	1.62829	0	0.244981
2022	MSH	Tiêu dùng không thiết yếu	0.4611	0.6317	0	-0.645487	0.645487	0.1154	0.2473	1.35259	0.0807308	0.355518	0.277982	0.0760775	0.533072	28.795	0.029	-0.029	-0.277982	0.241468	0.262831	0.1154	0.0763478	28.8232	0.478158	0.255525	1.84505	0	0.162889
2023	MSH	Tiêu dùng không thiết yếu	0.4611	0.5577	0	-0.149082	0.149082	0.0725	0.1502	1.60771	0.0563601	0.241468	-0.00230937	0.277982	0.478158	28.8232	0.003	-0.003	0.00230937	-0.297205	0.234904	0.0725	-0.000585478	28.8703	0.475903	0.224095	1.91145	0	-0.177333
2024	MSH	Tiêu dùng không thiết yếu	0.4521	0.5577	0	-0.233343	0.233343	0.1034	0.2134	1.40794	0.0459722	-0.297205	0.0474015	-0.00230937	0.475903	28.8703	0.082	-0.082	-0.0474015	0.213865	0.202601	0.1034	0.0121294	29.1402	0.545557	0.154669	1.74698	0	0.162596
2020	MSN	Tiêu dùng thiết yếu	0.0406	0.6254	0	-0.300167	0.300167	0.0116	0.042	2.22599	0.333438	0.409711	0.0138884	0.0138884	0.783731	32.3823	0.062	-0.062	-0.0138884	0.409711	0.509595	0.0116	0.0138884	32.3823	0.783731	0.428406	0.765555	1	1.06718
2021	MSN	Tiêu dùng thiết yếu	0.0409	0.5974	0	-0.272329	0.272329	0.0708	0.3513	1.55367	-0.0487344	0.409711	0.00988377	0.0138884	0.783731	32.3823	0.084	0.084	-0.00988377	0.0985942	0.368543	0.0708	0.00268482	32.468	0.664244	0.338272	1.26289	1	0.147776
2022	MSN	Tiêu dùng thiết yếu	0.041	0.5389	0	-0.186224	0.186224	0.0267	0.121	1.40157	0.162524	0.0985942	-0.030048	0.00988377	0.664244	32.468	0.06	-0.060	0.030048	-0.0986533	0.345263	0.0267	-0.00783371	32.5822	0.740795	0.308013	0.729853	1	-0.140356
2023	MSN	Tiêu dùng thiết yếu	0.0407	0.5401	0	-0.244725	0.244725	0.0029	0.0159	1.43082	0.0107154	-0.0986533	0.00354076	-0.030048	0.740795	32.5822	0.143	-0.143	-0.00354076	0.0145914	0.303417	0.0029	0.000935664	32.6241	0.74056	0.290981	0.867935	1	0.0270694
2024	MSN	Tiêu dùng thiết yếu	0.0415	0.42	0	-0.323135	0.323135	0.0136	0.0506	1.40609	0.0675787	0.0145914	0.0646305	0.00354076	0.74056	32.6241	0.151	0.151	-0.0646305	0.0334237	0.251383	0.0136	0.0164957	32.6254	0.723871	0.251041	0.912411	1	0.0629521
2020	MWG	Tiêu dùng không thiết yếu	0.0634	0.4703	0	-1.20155	1.20155	0.0893	0.2838	1.9446	0.093731	0.152771	0.258761	0.258761	0.663667	31.4603	0.252	0.252	-0.258761	0.152771	0.174905	0.0893	0.258761	31.4603	0.663667	0.15848	1.26832	1	0.0623619
2021	MWG	Tiêu dùng không thiết yếu	0.0464	0.4644	0	-0.641649	0.641649	0.0899	0.2734	1.15255	0.0911459	0.152771	0.00372338	0.258761	0.663667	31.4603	0.267	0.267	-0.00372338	0.313096	0.20958	0.0899	0.000976706	31.7737	0.676389	0.153199	1.2198	1	0.132774
2022	MWG	Tiêu dùng không thiết yếu	0.0432	0.4644	0	-0.87146	0.87146	0.069	0.1852	1.76168	0.0737011	0.313096	0.126665	0.00372338	0.676389	31.7737	0.113	-0.113	-0.126665	0.165895	0.154475	0.069	0.0365878	31.6534	0.571363	0.174222	1.71451	1	0.0849612
2023	MWG	Tiêu dùng không thiết yếu	0.043	0.4233	0	-0.701063	0.701063	0.0029	0.0071	2.09641	0.010705	0.165895	0.0615364	0.126665	0.571363	31.6534	0.102	0.102	-0.0615364	-0.270892	0.116419	0.0029	0.0144599	31.7272	0.611394	0.108135	1.6886	1	-0.113377
2024	MWG	Tiêu dùng không thiết yếu	0.0387	0.1049	0	-0.795756	0.795756	0.057	0.1446	1.86642	0.0519371	-0.270892	0.141693	0.0615364	0.611394	31.7272	0.007	-0.007	-0.141693	0.267194	0.0596665	0.057	0.03673	31.8858	0.60076	0.0509191	1.55582	1	0.135791
2020	NAF	Tiêu dùng thiết yếu	0.5483	0.5479	0	-0.237113	0.237113	0.0436	0.0855	1.33296	0.0204102	0.126405	0.0307522	0.0307522	0.510293	28.0585	0.107	-0.107	-0.0307522	0.126405	0.275814	0.0436	0.0307522	28.0585	0.510293	0.228715	1.63485	0	0.154258
2021	NAF	Tiêu dùng thiết yếu	0.5364	0.5442	0	-0.327956	0.327956	0.0486	0.0977	0.889969	0.0513574	0.126405	0.0703616	0.0307522	0.510293	28.0585	0.037	-0.037	-0.0703616	0.268678	0.237371	0.0486	0.0192325	28.1343	0.494335	0.220053	1.46869	0	0.342559
2022	NAF	Tiêu dùng thiết yếu	0.5084	0.5243	0	-0.270462	0.270462	0.0469	0.0923	1.04225	0.0404186	0.268678	0.00136479	0.0703616	0.494335	28.1343	0.103	-0.103	-0.00136479	0.091807	0.252796	0.0469	0.000354115	28.1871	0.48835	0.239793	1.5108	0	0.0940474
2023	NAF	Tiêu dùng thiết yếu	0.4818	0.4653	0	-0.351571	0.351571	0.058	0.1168	1.12315	0.0998937	0.091807	0.0716849	0.00136479	0.48835	28.1871	0.235	0.235	-0.0716849	-0.0190288	0.380818	0.058	0.0183943	28.3456	0.516472	0.324999	1.05405	0	-0.0187836
2024	NAF	Tiêu dùng thiết yếu	0.4725	0.4476	0	-0.312622	0.312622	0.0571	0.1178	1.06005	0.045751	-0.0190288	0.053039	0.0716849	0.516472	28.3456	0.027	-0.027	-0.053039	-0.145016	0.320491	0.0571	0.0143084	28.3386	0.514533	0.322742	1.15711	0	-0.170944
2020	NAV	Tiêu dùng không thiết yếu	0.4216	0.9052	0.2	-0.00124762	0.00124762	0.1344	0.2277	1.3366	-0.0519533	-0.183759	-0.0361204	-0.0361204	0.383824	25.9191	0.083	-0.083	0.0361204	-0.183759	0.0239051	0.1344	-0.0361204	25.9191	0.383824	0.024809	2.14323	0	-0.327156
2021	NAV	Tiêu dùng không thiết yếu	0.1005	0.9105	0.2	0.112042	0.112042	0.1022	0.1732	1.28517	0.00061619	-0.183759	-0.133403	-0.0361204	0.383824	25.9191	0.011	0.011	0.133403	-0.0526815	0.0219999	0.1022	-0.032732	25.9208	0.43571	0.0219641	2.15887	0	-0.134318
2022	NAV	Tiêu dùng không thiết yếu	0.1005	0.9105	0.2	0.181734	0.181734	0.1576	0.2204	1.17929	0.0430934	-0.0526815	-0.254414	-0.133403	0.43571	25.9208	0.021	-0.021	0.254414	0.217206	0.0610983	0.1576	-0.0636554	25.4557	0.045237	0.0972729	21.9914	0	0.640762
2023	NAV	Tiêu dùng không thiết yếu	0.1005	0.9052	0.2	-0.130139	0.130139	0.1802	0.1887	1.39701	0.0181694	0.217206	0.072011	-0.254414	0.045237	25.4557	0.003	0.003	-0.072011	0.253184	0.0978469	0.1802	0.0138906	25.5163	0.0445853	0.0920923	38.3787	0	0.285924
2024	NAV	Tiêu dùng không thiết yếu	0.1005	0.9105	0.2	0.158302	0.158302	0.1605	0.1688	1.36389	0.00260351	0.253184	-0.149718	0.072011	0.0445853	25.5163	0.032	-0.032	0.149718	-0.191641	0.0825418	0.1605	-0.0385635	25.4927	0.0538258	0.0845134	23.4657	0	-0.178818
2020	NBB	Bất động sản	0.0015	0.7838	0	-0.492927	0.492927	0.0671	0.1673	1.59359	0.00476465	0.55908	0.0540534	0.0540534	0.568131	29.0397	0.074	-0.074	-0.0540534	0.55908	0.0412122	0.0671	0.0540534	29.0397	0.568131	0.0571247	1.75057	0	9.58932
2021	NBB	Bất động sản	0.0015	0.6532	0	-0.343939	0.343939	0.0743	0.1756	0.87789	-0.00819454	0.55908	-0.0252218	0.0540534	0.568131	29.0397	0.007	-0.007	0.0252218	-0.717586	0.0541137	0.0743	-0.00528514	29.1066	0.581539	0.050613	0.813017	0	-0.838536
2022	NBB	Bất động sản	0.0008	0.4977	0	0.310912	0.310912	0.0011	0.0033	1.03757	-0.0193806	-0.717586	-0.261597	-0.0252218	0.581539	29.1066	0.027	-0.027	0.261597	-0.0226057	0.0562747	0.0011	-0.0675854	29.4853	0.715088	0.0385339	1.48905	0	-0.174919
2023	NBB	Bất động sản	0.0008	0.7502	0	0.0975273	0.0975273	0.0003	0.0011	1.06441	0.00704109	-0.0226057	-0.078329	-0.261597	0.715088	29.4853	0.064	-0.064	0.078329	-0.0271363	0.034737	0.0003	-0.0232465	29.564	0.736524	0.0321085	1.19427	0	-0.371656
2024	NBB	Bất động sản	0.0002	0.7467	0	0.152793	0.152793	0.0001	0.0004	1.05748	-0.00055249	-0.0271363	-0.101995	-0.078329	0.736524	29.564	0.02	-0.020	0.101995	-0.0330398	0.0314903	0.0001	-0.0265014	29.6792	0.765537	0.0280648	1.31783	0	-0.779117
2020	NCT	Công nghiệp	0.0011	0.6211	0.5513	-0.973803	0.973803	0.3802	0.4477	4.4722	0.0137554	-0.0515165	0.433214	0.433214	0.185321	26.9426	0.06	0.060	-0.433214	-0.0515165	0.173082	0.3802	0.433214	26.9426	0.185321	0.201632	3.79682	0	-0.0431021
2021	NCT	Công nghiệp	0.0007	0.6211	0.5513	-1.13132	1.13132	0.4234	0.5161	4.18922	0.0502215	-0.0515165	0.437785	0.433214	0.185321	26.9426	0.227	-0.227	-0.437785	0.144991	0.188096	0.4234	0.101107	27.0404	0.174463	0.170561	4.41524	0	0.108823
2022	NCT	Công nghiệp	0.0011	0.7089	0.5513	-1.04739	1.04739	0.4498	0.5332	4.76237	0.0708738	0.144991	0.400246	0.437785	0.174463	27.0404	0.489	0.489	-0.400246	-0.011266	0.206235	0.4498	0.104954	26.9391	0.13636	0.228237	5.35385	0	-0.00840981
2023	NCT	Công nghiệp	0.0011	0.7214	0.5513	-1.23618	1.23618	0.4109	0.5008	5.52607	0.0189281	-0.011266	0.542032	0.400246	0.13636	26.9391	0.071	-0.071	-0.542032	-0.0681704	0.193755	0.4109	0.128646	27.0416	0.218599	0.174874	3.52611	0	-0.0463722
2024	NCT	Công nghiệp	0.0011	0.7413	0.5513	-1.2729	1.2729	0.4113	0.5373	4.31489	0.0585204	-0.0681704	0.460272	0.542032	0.218599	27.0416	0.125	0.125	-0.460272	0.394585	0.164359	0.4113	0.120962	27.3311	0.246332	0.123046	3.08047	0	0.311854
2020	NHH	Nguyên vật liệu	0.0013	0.7239	0	-0.196362	0.196362	0.0789	0.1995	1.26704	0.21098	-0.146294	0.179577	0.179577	0.624763	28.1629	0.196	-0.196	-0.179577	-0.146294	0.742452	0.0789	0.179577	28.1629	0.624763	0.502062	1.00021	1	-0.136613
[truncated: 554 more rows]

## Sheet: Measurement of OverIE 
	Measurement of firm-level over-investment proxies
Step	Variable	Construction / Definition
[truncated: 8 more rows]

## Sheet: OverINV_robusness
			Classification of investment conditions based on investment efficiency residuals (OverINV)
[truncated: 7 more rows]

[truncated: 2 more sheets: Variable , Roychowdhury _Kothari (2005)]
